# Supplementary material for: One-pot, three-component regioselective coupling reaction of triphenylamine/carbazole derivatives with [60]fullerene and indoles via an “umpolung relay” strategy
Source: Royal Society of Chemistry journal article supplement (doi:10.1039/d1qo01058a), 2021-01-01

# Electronic Supplementary Information

## One-pot, Three-component Regioselective Coupling Reaction of Triphenylamine/Carbazole Derivatives with [60]Fullerene and Indoles via an “Umpolung Relay” Strategy

Xin-Rui Chen, Qian-Wen Zhang, Ge-Ge Tao, Jun Xuan, Hong-Ping Zhou, Yu-Peng Tian and Fei Li\*

*Department of Chemistry, Anhui University; Key Laboratory of Structure and Functional Regulation of Hybrid Materials (Anhui University), Ministry of Education; Anhui Province Key Laboratory of Chemistry for Inorganic/Organic Hybrid Functionalized Materials and Key Laboratory of Functional Inorganic Materials of Anhui Province, Hefei, Anhui 230601, People's Republic of China*

[lfe@ahu.edu.cn](mailto:lfe@ahu.edu.cn)

|                                                                                                                       |         |
|-----------------------------------------------------------------------------------------------------------------------|---------|
| 1. Experimental Procedures and Spectral Data of <b>3aa-5fg</b>                                                        | S3-S33  |
| 2. Experimental Procedure, Spectral Data, MALDI-TOF-MS spectrum and expanded <sup>13</sup> C NMR spectrum of <b>6</b> | S34-S35 |
| 3. NMR Spectra of <b>3aa-3ak</b> , <b>5aa-5fg</b> and <b>6</b>                                                        | S36-S90 |
| <sup>1</sup> H NMR spectrum and <sup>13</sup> C NMR spectrum of product <b>3aa</b>                                    | S36-S37 |
| <sup>1</sup> H NMR spectrum and <sup>13</sup> C NMR spectrum of product <b>3ba</b>                                    | S37-S38 |
| <sup>1</sup> H NMR spectrum and <sup>13</sup> C NMR spectrum of product <b>3ca</b>                                    | S39-S40 |
| <sup>1</sup> H NMR spectrum and <sup>13</sup> C NMR spectrum of product <b>3da</b>                                    | S40-S41 |
| <sup>1</sup> H NMR spectrum and <sup>13</sup> C NMR spectrum of product <b>3ea</b>                                    | S42-S43 |
| <sup>1</sup> H NMR spectrum and <sup>13</sup> C NMR spectrum of product <b>3fa</b>                                    | S43-S44 |
| <sup>1</sup> H NMR spectrum and <sup>13</sup> C NMR spectrum of product <b>3ga</b>                                    | S45-S46 |
| <sup>1</sup> H NMR spectrum and <sup>13</sup> C NMR spectrum of product <b>3ha</b>                                    | S46-S47 |
| <sup>1</sup> H NMR spectrum and <sup>13</sup> C NMR spectrum of product <b>3ia</b>                                    | S48-S49 |
| <sup>1</sup> H NMR spectrum and <sup>13</sup> C NMR spectrum of product <b>3ja</b>                                    | S49-S50 |
| <sup>1</sup> H NMR spectrum and <sup>13</sup> C NMR spectrum of product <b>3ab</b>                                    | S51-S52 |
| <sup>1</sup> H NMR spectrum and <sup>13</sup> C NMR spectrum of product <b>3fb</b>                                    | S52-S53 |
| <sup>1</sup> H NMR spectrum and <sup>13</sup> C NMR spectrum of product <b>3ac</b>                                    | S54-S55 |
| <sup>1</sup> H NMR spectrum and <sup>13</sup> C NMR spectrum of product <b>3fc</b>                                    | S55-S56 |
| <sup>1</sup> H NMR spectrum and <sup>13</sup> C NMR spectrum of product <b>3ad</b>                                    | S57-S58 |
| <sup>1</sup> H NMR spectrum and <sup>13</sup> C NMR spectrum of product <b>3fd</b>                                    | S58-S59 |
| <sup>1</sup> H NMR spectrum and <sup>13</sup> C NMR spectrum of product <b>3ae</b>                                    | S60-S61 |
| <sup>1</sup> H NMR spectrum and <sup>13</sup> C NMR spectrum of product <b>3fe</b>                                    | S61-S62 |
| <sup>1</sup> H NMR spectrum and <sup>13</sup> C NMR spectrum of product <b>3af</b>                                    | S63-S64 |

|                                                                                                                                                                                                                                              |          |
|----------------------------------------------------------------------------------------------------------------------------------------------------------------------------------------------------------------------------------------------|----------|
| <sup>1</sup> H NMR spectrum and <sup>13</sup> C NMR spectrum of product <b>3ff</b>                                                                                                                                                           | S64-S65  |
| <sup>1</sup> H NMR spectrum and <sup>13</sup> C NMR spectrum of product <b>3ag</b>                                                                                                                                                           | S66-S67  |
| <sup>1</sup> H NMR spectrum and <sup>13</sup> C NMR spectrum of product <b>3fg</b>                                                                                                                                                           | S67-S68  |
| <sup>1</sup> H NMR spectrum and <sup>13</sup> C NMR spectrum of product <b>3ah</b>                                                                                                                                                           | S69-S70  |
| <sup>1</sup> H NMR spectrum and <sup>13</sup> C NMR spectrum of product <b>3ai</b>                                                                                                                                                           | S70-S71  |
| <sup>1</sup> H NMR spectrum and <sup>13</sup> C NMR spectrum of product <b>3fi</b>                                                                                                                                                           | S72-S73  |
| <sup>1</sup> H NMR spectrum and <sup>13</sup> C NMR spectrum of product <b>3aj</b>                                                                                                                                                           | S73-S74  |
| <sup>1</sup> H NMR spectrum and <sup>13</sup> C NMR spectrum of product <b>3ak</b>                                                                                                                                                           | S75-S76  |
| <sup>1</sup> H NMR spectrum and <sup>13</sup> C NMR spectrum of product <b>5aa</b>                                                                                                                                                           | S76-S77  |
| <sup>1</sup> H NMR spectrum and <sup>13</sup> C NMR spectrum of product <b>5ab</b>                                                                                                                                                           | S78-S79  |
| <sup>1</sup> H NMR spectrum and <sup>13</sup> C NMR spectrum of product <b>5ac</b>                                                                                                                                                           | S76-S80  |
| <sup>1</sup> H NMR spectrum and <sup>13</sup> C NMR spectrum of product <b>5ad</b>                                                                                                                                                           | S81-S82  |
| <sup>1</sup> H NMR spectrum and <sup>13</sup> C NMR spectrum of product <b>5ae</b>                                                                                                                                                           | S82-S83  |
| <sup>1</sup> H NMR spectrum and <sup>13</sup> C NMR spectrum of product <b>5af</b>                                                                                                                                                           | S84-S85  |
| <sup>1</sup> H NMR spectrum and <sup>13</sup> C NMR spectrum of product <b>5ag</b>                                                                                                                                                           | S85-S86  |
| <sup>1</sup> H NMR spectrum and <sup>13</sup> C NMR spectrum of product <b>5fg</b>                                                                                                                                                           | S87-S88  |
| <sup>1</sup> H NMR spectrum and <sup>13</sup> C NMR spectrum of product <b>6</b>                                                                                                                                                             | S88-S90  |
| 4. Single-Crystal X-Ray Crystallography of <b>3aa</b> , <b>3ca</b> , <b>5ad</b> and <b>5af</b>                                                                                                                                               | S90-S96  |
| 5. Optimization of the Reaction Conditions                                                                                                                                                                                                   | S96-S97  |
| 6. UV-vis absorption spectra of compounds <b>3aa</b> , <b>3ba</b> , <b>3fa</b> , <b>3ga</b> , <b>3ha</b> , <b>3ae</b> , <b>3af</b> , <b>3ah</b> , <b>3ai</b> , <b>3ak</b> , <b>5ab</b> , <b>5ad</b> , <b>5af</b> , <b>5ag</b> and <b>5fg</b> | S97      |
| 7. The MALDI-TOF-MS spectra of <b>3aa-3ak</b> , <b>5aa-5fg</b>                                                                                                                                                                               | S98-S115 |

## Synthesis of 3aa

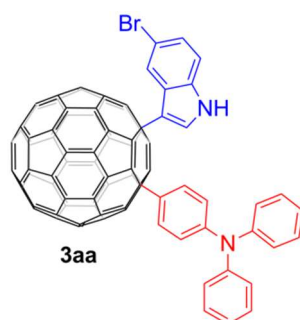

C<sub>60</sub> (36.0 mg, 0.05 mmol), 5-bromoindole (12 mg, 0.06 mmol), KO<sup>t</sup>Bu (11.2 mg, 0.1 mmol) were dissolved in chlorobenzene (8 mL) at room temperature under Ar atmosphere. Then DMSO (2 mL) was added to the mixture and the color of the solution changed gradually from purple to dark green. After being stirred for 30 minutes, CF<sub>3</sub>SO<sub>3</sub>H (90 μL, 1 mmol) was added to the mixture and the color changed from dark green to brown. And after being stirred for 10 minutes, DDQ (56 mg, 0.25 mmol) and triphenylamine (62 mg, 0.25 mmol) were added to the mixture and stirred in an oil bath at 130 °C for 60 minutes. The mixture was cooled to room temperature and then added 20 mL carbon disulfide. Resulting solution was washed with water and then evaporated in vacuo. The residue was separated on a silica gel column with carbon disulfide/dichloromethane (20:1) as the eluent to give unreacted C<sub>60</sub> (5.2 mg, 14%) and **3aa** (38.4 mg, 66%) as black amorphous solid. <sup>1</sup>H NMR (400 MHz, CS<sub>2</sub>/d<sub>6</sub>-acetone) δ 10.55 (s, 1H), 8.41 (s, 1H), 7.92 (d, *J* = 8.4 Hz, 2H), 7.74 (d, *J* = 2.4 Hz, 1H), 7.38 (d, *J* = 8.8 Hz, 1H), 7.28 - 7.22 (m, 5H), 7.09 (t, *J* = 6.8 Hz, 6H), 7.01 (t, *J* = 7.2 Hz, 2H). <sup>13</sup>C NMR (100 MHz, CS<sub>2</sub>/d<sub>6</sub>-acetone) (all 1C unless indicated) δ 157.10, 157.00, 151.71, 151.60, 149.14(2C), 149.01, 148.85, 148.05, 147.72(3C), 147.66, 147.60(2C), 147.50(3C), 147.36, 147.30, 146.09, 146.04, 145.92(aryl C), 145.63(2C), 145.32(3C), 145.27, 145.24, 144.99, 144.94(2C), 144.87, 144.84, 144.79, 144.72, 144.62, 144.54(3C), 144.39, 143.82(aryl C), 143.72(2C), 143.67, 143.65(2C), 143.27, 143.15(4C), 142.94(aryl C), 142.74, 142.58, 141.48, 139.27, 139.14, 138.10, 137.97, 136.58(aryl C), 134.48(aryl C), 130.00(aryl C, 4C), 129.17(aryl C, 2C), 128.12(aryl C), 125.97(aryl C), 125.83(aryl C), 125.16(aryl C, 4C), 124.06(aryl C, 2C), 123.87(aryl C, 2C), 123.55(aryl C), 115.90(aryl C), 114.52(aryl C), 114.17(aryl C), 61.85(sp<sup>3</sup>-C of C<sub>60</sub>), 56.77(sp<sup>3</sup>-C of C<sub>60</sub>). UV-vis (CHCl<sub>3</sub>) λ<sub>max</sub> 448, 542, 683 nm; HRMS (MALDI-TOF-MS, DCTB as matrix, negative mode): *m/z* [M]<sup>-</sup> calcd for C<sub>86</sub>H<sub>19</sub>BrN<sub>2</sub> 1160.0724; found 1160.0718.

## Synthesis of 3ba

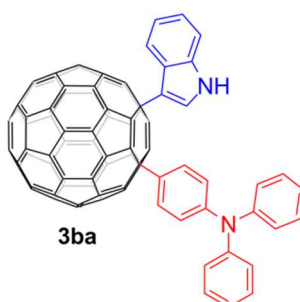

C<sub>60</sub> (36.0 mg, 0.05 mmol), indole (7.2 mg, 0.06 mmol), KO<sup>t</sup>Bu (11.2 mg, 0.1 mmol) were dissolved in chlorobenzene (8 mL) at room temperature under Ar atmosphere. Then DMSO (2 mL) was added to the mixture and the color of the solution changed gradually from purple to dark green. After being stirred for 30 minutes, CF<sub>3</sub>SO<sub>3</sub>H (90 μL, 1 mmol) was added to the mixture and the color changed from dark green to brown. And after being stirred for 10 minutes, DDQ (56 mg, 0.25 mmol) and triphenylamine (62 mg, 0.25 mmol) were added to the mixture and stirred in an oil bath at 130 °C for 60 minutes. The mixture was cooled to room temperature and then added 20 mL carbon disulfide. Resulting solution was washed with water and then evaporated in vacuo. The residue was separated on a silica gel column with carbon disulfide/dichloromethane (20:1) as the eluent to give unreacted C<sub>60</sub> (10.2 mg, 28%) and **3ba** (27.9 mg, 52%) as black amorphous solid. <sup>1</sup>H NMR (400 MHz, CS<sub>2</sub>/d<sub>6</sub>-acetone) δ 10.25 (s, 1H), 8.34 (d, *J* = 8.0 Hz, 1H), 7.94 (d, *J* = 8.4 Hz, 2H), 7.70 (s, 1H), 7.43 (d, *J* = 8.4 Hz, 1H), 7.25 (t, *J* = 7.6 Hz, 3H), 7.18 (t, *J* = 7.6 Hz, 2H), 7.10 (t, *J* = 7.6 Hz, 6H), 7.01 (t, *J* = 7.2 Hz, 3H). <sup>13</sup>C NMR (100 MHz, CS<sub>2</sub>/d<sub>6</sub>-acetone) (all 1C unless indicated) δ 157.69, 157.15, 152.08, 151.84, 149.28, 149.21, 149.15, 148.97, 148.07(2C), 147.81(5C), 147.72(2C), 147.65, 147.60(2C), 147.40(2C), 146.12(aryl C, 2C), 145.92, 145.77, 145.71, 145.63, 145.43(4C), 145.02(3C), 144.95(2C), 144.83(2C), 144.60(3C), 144.51, 144.43, 143.89, 143.74(3C), 143.69, 143.25(4C), 142.92(aryl C), 142.79, 142.66, 141.45, 139.34, 139.23, 138.21, 137.98, 137.93(aryl C), 134.75(aryl C), 130.01(aryl C, 4C), 129.31(aryl C, 2C), 126.53(aryl C), 125.13(aryl C, 4C), 124.46(aryl C), 124.25(aryl C, 2C), 123.84(aryl C, 2C), 123.17(aryl C), 121.31(aryl C), 120.79(aryl C), 116.26(aryl C), 112.64(aryl C), 61.93(sp<sup>3</sup>-C of C<sub>60</sub>), 57.26(sp<sup>3</sup>-C of C<sub>60</sub>). UV-vis (CHCl<sub>3</sub>) λ<sub>max</sub> 448, 542, 682 nm; HRMS (MALDI-TOF-MS, DCTB as matrix, negative mode): *m/z* [M]<sup>-</sup> calcd for C<sub>86</sub>H<sub>20</sub>N<sub>2</sub> 1080.1632; found 1080.1641.

### Synthesis of 3ca

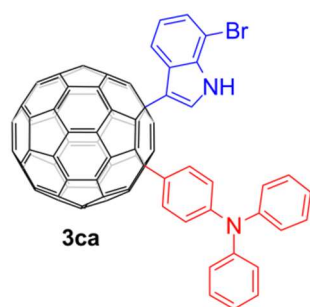

C<sub>60</sub> (36.0 mg, 0.05 mmol), 7-bromoindole (12 mg, 0.06 mmol), KO<sup>t</sup>Bu (11.2 mg, 0.1 mmol) were dissolved in chlorobenzene (8 mL) at room temperature under Ar atmosphere. Then DMSO (2 mL) was added to the mixture and the color of the solution changed gradually from purple to dark green. After being stirred for 30 minutes, CF<sub>3</sub>SO<sub>3</sub>H (90 μL, 1 mmol) was added to the mixture and the color changed from dark green to brown. And after being stirred for 10 minutes, DDQ (56 mg, 0.25 mmol) and triphenylamine (62 mg, 0.25 mmol) were added to the mixture and stirred in an oil bath at 130 °C for 60 minutes. The mixture was cooled to room temperature

and then added 20 mL carbon disulfide. Resulting solution was washed with water and then evaporated in vacuo. The residue was separated on a silica gel column with carbon disulfide/dichloromethane (20:1) as the eluent to give unreacted C<sub>60</sub> (10 mg, 28%) and **3ca** (38 mg, 66%) as black amorphous solid. <sup>1</sup>H NMR (400 MHz, CS<sub>2</sub>/d<sub>6</sub>-acetone) δ 10.43 (s, 1H), 8.36 (d, *J* = 8.0 Hz, 1H), 7.96 (d, *J* = 8.8 Hz, 2H), 7.84 (d, *J* = 2.4 Hz, 1H), 7.39 (d, *J* = 7.2 Hz, 1H), 7.27 (t, *J* = 7.8 Hz, 4H), 7.15 - 7.08 (m, 6H), 7.06 - 7.01 (m, 3H). <sup>13</sup>C NMR (100 MHz, CS<sub>2</sub>/d<sub>6</sub>-acetone) (all 1C unless indicated) δ 157.20, 157.15, 151.79, 151.69, 149.18(2C), 149.11, 148.96, 148.18, 147.76(3C), 147.69, 147.66(3C), 147.56(2C), 147.39, 147.34, 146.12, 146.09, 145.99(aryl C), 145.66(2C), 145.46, 145.38, 145.35, 145.33, 145.30, 144.98(2C), 144.97, 144.94, 144.89, 144.87, 144.84, 144.67, 144.65, 144.62, 144.53, 144.52, 144.46, 143.84(aryl C), 143.78, 143.74, 143.72, 143.70, 143.68, 143.31, 143.23, 143.21, 143.19(2C), 142.88(aryl C), 142.81, 142.63, 141.48, 139.36, 139.20, 138.09, 136.42(aryl C), 134.36(aryl C), 130.07(aryl C, 4C), 129.20(aryl C, 2C), 127.98(aryl C), 125.68(aryl C), 125.62(aryl C), 125.20(aryl C, 4C), 124.15(aryl C, 2C), 123.96(aryl C, 2C), 121.92(aryl C), 120.67(aryl C), 117.41(aryl C), 106.32(aryl C), 61.91(sp<sup>3</sup>-C of C<sub>60</sub>), 57.02(sp<sup>3</sup>-C of C<sub>60</sub>). HRMS (MALDI-TOF-MS, DCTB as matrix, negative mode): *m/z* [M]<sup>-</sup> calcd for C<sub>86</sub>H<sub>19</sub>BrN<sub>2</sub> 1160.0724; found 1160.0729.

### Synthesis of **3da**

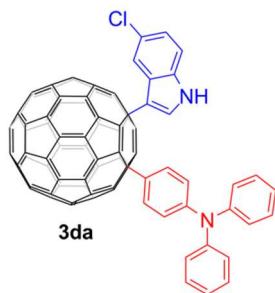

C<sub>60</sub> (36.0 mg, 0.05 mmol), 5-chloroindole (9 mg, 0.06 mmol), KO<sup>t</sup>Bu (11.2 mg, 0.1 mmol) were dissolved in chlorobenzene (8 mL) at room temperature under Ar atmosphere. Then DMSO (2 mL) was added to the mixture and the color of the solution changed gradually from purple to dark green. After being stirred for 30 minutes, CF<sub>3</sub>SO<sub>3</sub>H (90 μL, 1 mmol) was added to the mixture and the color changed from dark green to brown. And after being stirred for 10 minutes, DDQ (56 mg, 0.25 mmol) and triphenylamine (62 mg, 0.25 mmol) were added to the mixture and stirred in an oil bath at 130 °C for 60 minutes. The mixture was cooled to room temperature and then added 20 mL carbon disulfide. Resulting solution was washed with water and then evaporated in vacuo. The residue was separated on a silica gel column with carbon disulfide/dichloromethane (20:1) as the eluent to give unreacted C<sub>60</sub> (6.7 mg, 19%) and **3da** (35 mg, 63%) as black amorphous solid. <sup>1</sup>H NMR (400 MHz, CS<sub>2</sub>/d<sub>6</sub>-acetone) δ 10.58 (s, 1H), 8.28 (s, 1H), 7.94 (d, *J* = 8.8 Hz, 2H), 7.79 (d, *J* = 2.4 Hz, 1H), 7.44 (d, *J* = 8.8 Hz, 1H), 7.26 (t, *J* = 7.8 Hz, 4H), 7.16 - 7.09 (m, 7H), 7.03 (t, *J* = 7.2 Hz, 2H). <sup>13</sup>C NMR (100 MHz, CS<sub>2</sub>/d<sub>6</sub>-acetone) (all 1C unless indicated) δ 157.22, 157.13, 151.80, 151.72, 149.20, 149.18, 149.09, 148.94, 148.15, 147.78(3C),

147.71, 147.66(2C), 147.59(3C), 147.42, 147.36, 146.14, 146.10, 145.98(aryl C), 145.68(2C), 145.48, 145.38(2C), 145.34, 145.31, 145.04, 145.00(2C), 144.93(3C), 144.85, 144.77, 144.66, 144.62, 144.59(2C), 144.46, 143.87(aryl C), 143.79, 143.76, 143.74, 143.71(2C), 143.32, 143.21(3C), 142.98(aryl C), 142.80, 142.64, 141.51, 139.34, 139.22, 138.15, 138.02, 136.40(aryl C), 134.48(aryl C), 130.04(aryl C, 4C), 129.21(aryl C, 2C), 127.50(aryl C), 126.60(aryl C), 126.12(aryl C), 125.24(aryl C, 4C), 124.05(aryl C, 2C), 123.94(aryl C, 2C), 123.42(aryl C), 120.56(aryl C), 116.00(aryl C), 113.84(aryl C), 61.94(sp<sup>3</sup>-C of C<sub>60</sub>), 56.87(sp<sup>3</sup>-C of C<sub>60</sub>). HRMS (MALDI-TOF-MS, DCTB as matrix, negative mode): m/z [M]<sup>-</sup> calcd for C<sub>86</sub>H<sub>19</sub>ClN<sub>2</sub> 1114.1242; found 1114.1238.

### Synthesis of **3ea**

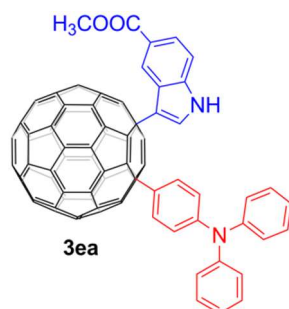

C<sub>60</sub> (36.0 mg, 0.05 mmol), methyl indole-5-carboxylate (10.2 mg, 0.06 mmol), KO<sup>t</sup>Bu (11.2 mg, 0.1 mmol) were dissolved in chlorobenzene (8 mL) at room temperature under Ar atmosphere. Then DMSO (2 mL) was added to the mixture and the color of the solution changed gradually from purple to dark green. After being stirred for 30 minutes, CF<sub>3</sub>SO<sub>3</sub>H (90 μL, 1 mmol) was added to the mixture and the color changed from dark green to brown. And after being stirred for 10 minutes, DDQ (56 mg, 0.25 mmol) and triphenylamine (62 mg, 0.25 mmol) were added to the mixture and stirred in an oil bath at 130 °C for 60 minutes. The mixture was cooled to room temperature and then added 20 mL carbon disulfide. Resulting solution was washed with water and then evaporated in vacuo. The residue was separated on a silica gel column with carbon disulfide/dichloromethane (2:1) as the eluent to give unreacted C<sub>60</sub> (5.3 mg, 15%) and **3ea** (37 mg, 65%) as black amorphous solid. <sup>1</sup>H NMR (400 MHz, CS<sub>2</sub>/d<sub>6</sub>-acetone) δ 10.43 (s, 1H), 9.04 (s, 1H), 7.90 (d, J = 8.4 Hz, 2H), 7.86 (d, J = 8.8 Hz, 1H), 7.75 (s, 1H), 7.45 (d, J = 8.8 Hz, 1H), 7.23 (t, J = 7.6 Hz, 4H), 7.07 (t, J = 8.4 Hz, 6H), 7.00 (t, J = 7.6 Hz, 2H), 3.81 (s, 3H). <sup>13</sup>C NMR (100 MHz, CS<sub>2</sub>/d<sub>6</sub>-acetone) (all 1C unless indicated) δ 166.78(acyl C), 157.10, 156.97, 151.68, 151.55, 149.15, 149.12, 149.03, 148.81, 147.97, 147.69(2C), 147.66, 147.60, 147.57, 147.53, 147.52(2C), 147.38, 147.30, 146.10, 146.04, 145.84(aryl C), 145.63(2C), 145.40, 145.34, 145.32, 145.29, 145.21, 144.99, 144.94(2C), 144.88, 144.85, 144.84, 144.78, 144.70, 144.63, 144.54(2C), 144.52, 144.38, 143.84(aryl C), 143.72(2C), 143.68, 143.65(2C), 143.27, 143.18, 143.14(3C), 142.91(aryl C), 142.74, 142.59, 141.48, 140.28, 139.24, 139.21, 138.08, 138.03(aryl C), 134.55(aryl C), 129.96(aryl C, 4C), 129.16(aryl C, 2C), 125.98(aryl C), 125.74(aryl C), 125.07(aryl C, 4C), 124.54(aryl C), 124.13(aryl C, 2C), 124.10(aryl C), 123.80(aryl C, 2C), 122.93(aryl C),

117.76(aryl C), 112.13(aryl C), 61.80(sp<sup>3</sup>-C of C<sub>60</sub>), 56.73(sp<sup>3</sup>-C of C<sub>60</sub>), 51.81(-OCH<sub>3</sub>). HRMS (MALDI-TOF-MS, DCTB as matrix, negative mode): m/z [M]<sup>-</sup> calcd for C<sub>88</sub>H<sub>22</sub>O<sub>2</sub>N<sub>2</sub> 1138.1687; found 1138.1694.

### Synthesis of 3fa

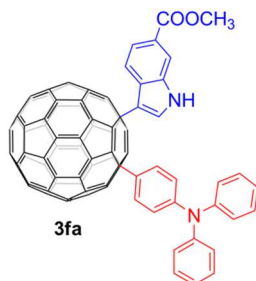

C<sub>60</sub> (36.0 mg, 0.05 mmol), methyl indole-6-carboxylate (10.2 mg, 0.06 mmol), KO<sup>t</sup>Bu (11.2 mg, 0.1 mmol) were dissolved in chlorobenzene (8 mL) at room temperature under Ar atmosphere. Then DMSO (2 mL) was added to the mixture and the color of the solution changed gradually from purple to dark green. After being stirred for 30 minutes, CF<sub>3</sub>SO<sub>3</sub>H (90 μL, 1 mmol) was added to the mixture and the color changed from dark green to brown. And after being stirred for 10 minutes, DDQ (56 mg, 0.25 mmol) and triphenylamine (62 mg, 0.25 mmol) were added to the mixture and stirred in an oil bath at 130 °C for 60 minutes. The mixture was cooled to room temperature and then added 20 mL carbon disulfide. Resulting solution was washed with water and then evaporated in vacuo. The residue was separated on a silica gel column with carbon disulfide/dichloromethane (2:1) as the eluent to give unreacted C<sub>60</sub> (3.4 mg, 9%) and **3fa** (45 mg, 79%) as black amorphous solid. <sup>1</sup>H NMR (400 MHz, CS<sub>2</sub>/d<sub>6</sub>-acetone) δ 10.73 (s, 1H), 8.35 (d, *J* = 8.4 Hz, 1H), 8.15 (s, 1H), 7.95 - 7.92 (m, 3H), 7.76 (dd, *J* = 8.4, 1.2 Hz, 1H), 7.25 (t, *J* = 7.8 Hz, 4H), 7.11 (t, *J* = 8.4 Hz, 6H), 7.02 (t, *J* = 7.2 Hz, 2H), 3.88 (s, 3H). <sup>13</sup>C NMR (100 MHz, CS<sub>2</sub>/d<sub>6</sub>-acetone) (all 1C unless indicated) δ 166.96(acyl C), 157.27, 157.21, 151.80, 151.75, 149.21, 149.19, 149.15, 148.99, 148.19, 147.75(2C), 147.72, 147.68, 147.63(2C), 147.59, 147.57, 147.42, 147.37, 146.14, 146.12, 145.89(aryl C), 145.69(2C), 145.55, 145.39(2C), 145.35, 145.31, 145.00(3C), 144.95, 144.94, 144.91, 144.86, 144.72, 144.65, 144.63, 144.58, 144.56, 144.48, 143.86(aryl C), 143.80, 143.77, 143.75, 143.72(2C), 143.34, 143.22(4C), 142.94(aryl C), 142.83, 142.66, 141.51, 139.34, 139.25, 138.08, 138.01, 137.29(aryl C), 134.37(aryl C), 130.04(aryl C, 4C), 129.65(aryl C), 129.16(aryl C, 2C), 127.86(aryl C), 125.19(aryl C, 4C), 124.80(aryl C), 124.15(aryl C, 2C), 123.92(aryl C, 2C), 121.59(aryl C), 120.71(aryl C), 116.58(aryl C), 115.08(aryl C), 61.91(sp<sup>3</sup>-C of C<sub>60</sub>), 56.88(sp<sup>3</sup>-C of C<sub>60</sub>), 51.84(-OCH<sub>3</sub>). UV-vis (CHCl<sub>3</sub>) λ<sub>max</sub> 449, 538, 683 nm; HRMS (MALDI-TOF-MS, DCTB as matrix, negative mode): m/z [M]<sup>-</sup> calcd for C<sub>88</sub>H<sub>22</sub>O<sub>2</sub>N<sub>2</sub> 1138.1687; found 1138.1679.

### Synthesis of 3ga

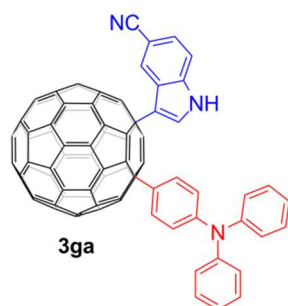

C<sub>60</sub> (36.0 mg, 0.05 mmol), indole-5-carbonitrile (8.6 mg, 0.06 mmol), KO<sup>t</sup>Bu (11.2 mg, 0.1 mmol) were dissolved in chlorobenzene (8 mL) at room temperature under Ar atmosphere. Then DMSO (2 mL) was added to the mixture and the color of the solution changed gradually from purple to dark green. After being stirred for 30 minutes, CF<sub>3</sub>SO<sub>3</sub>H (90 μL, 1 mmol) was added to the mixture and the color changed from dark green to brown. And after being stirred for 10 minutes, DDQ (56 mg, 0.25 mmol) and triphenylamine (62 mg, 0.25 mmol) were added to the mixture and stirred in an oil bath at 130 °C for 60 minutes. The mixture was cooled to room temperature and then added 20 mL carbon disulfide. Resulting solution was washed with water and then evaporated in vacuo. The residue was separated on a silica gel column with carbon disulfide/dichloromethane (2:1) as the eluent to give unreacted C<sub>60</sub> (11.4 mg, 32%) and **3ga** (30.2 mg, 55%) as black amorphous solid. <sup>1</sup>H NMR (400 MHz, CS<sub>2</sub>/d<sub>6</sub>-DMSO) δ 11.89 (s, 1H), 8.59 (s, 1H), 7.96 (d, *J* = 8.8 Hz, 2H), 7.91 (d, *J* = 2.0 Hz, 1H), 7.65 (d, *J* = 8.4 Hz, 1H), 7.44 (d, *J* = 8.4 Hz, 1H), 7.29 (t, *J* = 7.8 Hz, 4H), 7.15 - 7.12 (m, 6H), 7.05 (t, *J* = 7.2 Hz, 2H). <sup>13</sup>C NMR (100 MHz, CS<sub>2</sub>/d<sub>6</sub>-DMSO) (all 1C unless indicated) δ 155.82, 155.74, 150.42, 150.26, 147.89(2C), 147.69, 147.63, 146.82, 146.40(4C), 146.36, 146.29, 146.27(2C), 146.14(2C), 146.05(aryl C), 144.84, 144.79, 144.67, 144.37(2C), 144.06(2C), 144.03, 143.97(aryl C), 143.86, 143.73, 143.68(2C), 143.63, 143.56(3C), 143.41, 143.37, 143.30(3C), 143.16(aryl C), 142.55, 142.47(2C), 142.43(3C), 142.03, 141.89(4C), 141.71, 141.50, 141.32, 140.26, 138.35, 138.05, 137.84, 136.76(aryl C), 136.64(aryl C), 132.96(aryl C), 128.83(aryl C, 4C), 127.88(aryl C, 2C), 126.22(aryl C), 124.81(aryl C), 124.64(aryl C), 123.96(aryl C, 4C), 122.83(aryl C, 2C), 122.69(aryl C, 2C), 119.01(-CN), 115.07(aryl C), 112.93(aryl C), 102.62(aryl C), 60.57(sp<sup>3</sup>-C of C<sub>60</sub>), 55.34(sp<sup>3</sup>-C of C<sub>60</sub>). UV-vis (CHCl<sub>3</sub>) λ<sub>max</sub> 448, 543, 682 nm; HRMS (MALDI-TOF-MS, DCTB as matrix, negative mode): *m/z* [M]<sup>-</sup> calcd for C<sub>87</sub>H<sub>19</sub>N<sub>3</sub> 1105.1579; found 1105.1572.

### Synthesis of 3ha

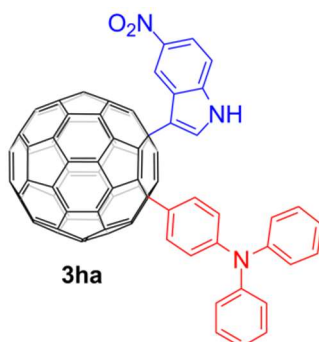



C<sub>60</sub> (36.0 mg, 0.05 mmol), 5-nitroindole (9.8 mg, 0.06 mmol), KO<sup>t</sup>Bu (11.2 mg, 0.1 mmol) were dissolved in chlorobenzene (8 mL) at room temperature under Ar atmosphere. Then DMSO (2 mL) was added to the mixture and the color of the solution changed gradually from purple to dark green. After being stirred for 30 minutes, CF<sub>3</sub>SO<sub>3</sub>H (90 μL, 1 mmol) was added to the mixture and the color changed from dark green to brown. And after being stirred for 10 minutes, DDQ (56 mg, 0.25 mmol) and triphenylamine (62 mg, 0.25 mmol) were added to the mixture and stirred in an oil bath at 130 °C for 60 minutes. The mixture was cooled to room temperature and then added 20 mL carbon disulfide. Resulting solution was washed with water and then evaporated in vacuo. The residue was separated on a silica gel column with carbon disulfide/dichloromethane (3:1) as the eluent to give unreacted C<sub>60</sub> (12.7 mg, 35%) and **3ha** (27.4 mg, 49%) as black amorphous solid. <sup>1</sup>H NMR (400 MHz, CS<sub>2</sub>/d<sub>6</sub>-acetone) δ 11.02 (s, 1H), 9.29 (s, 1H), 8.10 (dd, *J* = 8.8, 2.0 Hz, 1H), 7.98 - 7.89 (m, 3H), 7.60 (d, *J* = 8.8 Hz, 1H), 7.25 (t, *J* = 7.8 Hz, 4H), 7.09 (t, *J* = 8.8 Hz, 5H), 7.02 (t, *J* = 7.2 Hz, 3H). <sup>13</sup>C NMR (100 MHz, CS<sub>2</sub>/d<sub>6</sub>-acetone) (all 1C unless indicated) δ 157.13, 156.79, 151.82, 151.24, 149.28(2C), 148.98, 148.91, 148.25, 147.76(5C), 147.64(4C), 147.52, 147.41(2C), 146.24(3C), 145.80(aryl C), 145.73, 145.41(2C), 145.18, 145.04(5C), 144.92(2C), 144.81(2C), 144.69(4C), 144.54, 143.94(aryl C), 143.81(4C), 143.40, 143.28(2C), 143.24(2C), 143.08(aryl C), 142.87, 142.64(3C), 141.70, 140.81, 139.50, 139.15(aryl C), 138.10(aryl C), 134.32(aryl C), 130.05(aryl C, 4C), 129.13(aryl C, 2C), 127.79(aryl C), 125.72(aryl C), 125.26(aryl C, 4C), 124.08(aryl C, 2C), 123.99(aryl C, 2C), 118.85(aryl C), 118.48(aryl C), 118.17(aryl C), 112.72(aryl C), 61.96(sp<sup>3</sup>-C of C<sub>60</sub>), 56.47(sp<sup>3</sup>-C of C<sub>60</sub>). UV-vis (CHCl<sub>3</sub>) λ<sub>max</sub> 447, 539, 684 nm; HRMS (MALDI-TOF-MS, DCTB as matrix, negative mode): *m/z* [M]<sup>-</sup> calcd for C<sub>86</sub>H<sub>19</sub>O<sub>2</sub>N<sub>3</sub> 1125.1483; found 1125.1475.

### Synthesis of 3ia

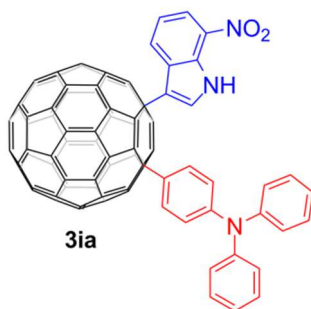

C<sub>60</sub> (36.0 mg, 0.05 mmol), 7-nitroindole (9.8 mg, 0.06 mmol), KO<sup>t</sup>Bu (11.2 mg, 0.1 mmol) were dissolved in chlorobenzene (8 mL) at room temperature under Ar atmosphere. Then DMSO (2 mL) was added to the mixture and the color of the solution changed gradually from purple to dark green. After being stirred for 30 minutes, CF<sub>3</sub>SO<sub>3</sub>H (90 μL, 1 mmol) was added to the mixture and the color changed from dark green to brown. And after being stirred for 10 minutes, DDQ (56 mg, 0.25 mmol) and triphenylamine (62 mg, 0.25 mmol) were added to the mixture and stirred in an oil bath at 130 °C for 60 minutes. The mixture was cooled to room temperature and then added 20 mL carbon disulfide. Resulting solution was washed with water

and then evaporated in vacuo. The residue was separated on a silica gel column with carbon disulfide/dichloromethane (2:1) as the eluent to give unreacted C<sub>60</sub> (16.0 mg, 44%) and **3ia** (24 mg, 43%) as black amorphous solid. <sup>1</sup>H NMR (400 MHz, CS<sub>2</sub>/d<sub>6</sub>-DMSO) δ 12.16 (s, 1H), 8.80 (d, *J* = 8.0 Hz, 1H), 8.20 (d, *J* = 7.6 Hz, 1H), 7.97-7.93 (m, 3H), 7.31-7.27 (m, 5H), 7.17-7.12 (m, 6H), 7.05 (t, *J* = 7.2 Hz, 2H). <sup>13</sup>C NMR (100 MHz, CS<sub>2</sub>/d<sub>6</sub>-DMSO) δ 155.85, 155.52, 150.41, 150.12, 147.87(2C), 147.63(2C), 146.89, 146.38(5C), 146.27, 146.24(3C), 146.20, 146.09, 146.05(aryl C), 144.82(2C), 144.39, 144.36, 144.05, 144.02, 143.95, 143.91(aryl C), 143.82, 143.66(4C), 143.55, 143.51, 143.38, 143.30(aryl C), 143.25(2C), 143.19(2C), 142.52(2C), 142.49, 142.45, 142.42(2C), 142.38, 142.03, 141.91(2C), 141.86(2C), 141.60, 141.53, 141.31, 140.24(aryl C), 138.13, 137.72, 136.77, 136.69, 132.76(aryl C), 129.37(aryl C), 129.33(aryl C), 128.84(aryl C, 4C), 127.82(aryl C, 2C), 127.60(aryl C), 127.47(aryl C), 123.95(aryl C, 4C), 122.90(aryl C, 2C), 122.72(aryl C, 2C), 118.62(aryl C), 118.32(aryl C), 115.72(aryl C), 60.57(sp<sup>3</sup>-C of C<sub>60</sub>), 55.14(sp<sup>3</sup>-C of C<sub>60</sub>). HRMS (MALDI-TOF-MS, DCTB as matrix, negative mode): *m/z* [M]<sup>-</sup> calcd for C<sub>86</sub>H<sub>19</sub>O<sub>2</sub>N<sub>3</sub> 1125.1483; found 1125.1492.

### Synthesis of **3ja**

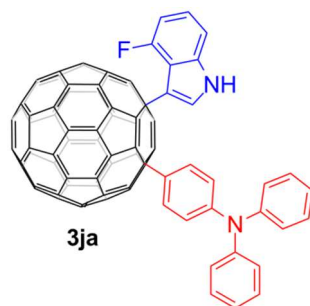

C<sub>60</sub> (36.0 mg, 0.05 mmol), 4-fluoroindole (8 μL, 0.06 mmol), KO<sup>t</sup>Bu (11.2 mg, 0.1 mmol) were dissolved in chlorobenzene (8 mL) at room temperature under Ar atmosphere. Then DMSO (2 mL) was added to the mixture and the color of the solution changed gradually from purple to dark green. After being stirred for 30 minutes, CF<sub>3</sub>SO<sub>3</sub>H (90 μL, 1 mmol) was added to the mixture and the color changed from dark green to brown. And after being stirred for 10 minutes, DDQ (56 mg, 0.25 mmol) and triphenylamine (62 mg, 0.25 mmol) were added to the mixture and stirred in an oil bath at 130 °C for 60 minutes. The mixture was cooled to room temperature and then added 20 mL carbon disulfide. Resulting solution was washed with water and then evaporated in vacuo. The residue was separated on a silica gel column with carbon disulfide/dichloromethane (2:1) as the eluent to give unreacted C<sub>60</sub> (8.0 mg, 22%) and **3ja** (27.5 mg, 50%) as black amorphous solid. <sup>1</sup>H NMR (400 MHz, CS<sub>2</sub>/d<sub>6</sub>-acetone) δ 10.68 (s, 1H), 7.95 (d, *J* = 8.4 Hz, 2H), 7.81 (d, *J* = 2.4 Hz, 1H), 7.29 - 7.25 (m, 5H), 7.16 (dd, *J* = 7.8, 4.9 Hz, 1H), 7.11 (t, *J* = 8.0 Hz, 6H), 7.03 (t, *J* = 7.2 Hz, 2H), 6.81 (dd, *J* = 11.6, 7.6 Hz, 1H). <sup>13</sup>C NMR (100 MHz, CS<sub>2</sub>/d<sub>6</sub>-acetone) δ 157.63, 156.83(aryl C, d, *J* = 247.6 Hz), 157.21, 152.45, 151.82, 149.82, 149.20, 149.17, 148.78(2C), 148.10, 147.86(3C), 147.81, 147.68, 147.66, 147.60(2C), 147.46, 147.34, 146.51, 146.16(2C), 145.87(aryl C), 145.74(2C), 145.48, 145.42, 145.35,

145.14, 145.05(3C), 145.02, 144.92, 144.78, 144.70, 144.64, 144.53, 144.45, 144.43, 144.08, 143.97(aryl C), 143.86, 143.75(2C), 143.50, 143.39, 143.37, 143.20(aryl C), 143.15, 143.08, 142.78(2C), 142.20, 141.32, 141.07, 140.95, 139.93(aryl C), 139.35(aryl C), 139.28, 138.20, 134.61, 130.07(aryl C, 4C), 129.30(aryl C, 2C), 126.25(aryl C), 125.17(aryl C, 4C), 124.20(aryl C, 2C), 123.91(aryl C, 2C), 123.79(aryl C, d,  $J = 7.4$  Hz), 116.00(aryl C), 115.30(aryl C, d,  $J = 21.1$  Hz), 108.94(aryl C), 106.01(aryl C, d,  $J = 20.8$  Hz), 61.86(sp<sup>3</sup>-C of C<sub>60</sub>), 56.86(sp<sup>3</sup>-C of C<sub>60</sub>). HRMS (MALDI-TOF-MS, DCTB as matrix, negative mode):  $m/z$  [M]<sup>-</sup> calcd for C<sub>86</sub>H<sub>19</sub>FN<sub>2</sub> 1098.1538; found 1098.1546.

### Synthesis of 3ab

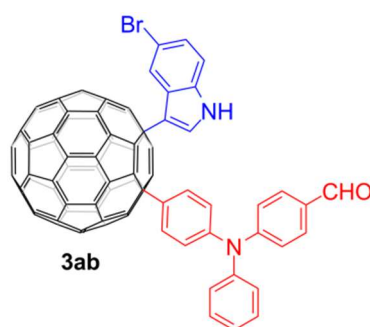

C<sub>60</sub> (36.0 mg, 0.05 mmol), 5-bromoindole (12 mg, 0.06 mmol), KO<sup>t</sup>Bu (11.2 mg, 0.1 mmol) were dissolved in chlorobenzene (8 mL) at room temperature under Ar atmosphere. Then DMSO (2 mL) was added to the mixture and the color of the solution changed gradually from purple to dark green. After being stirred for 30 minutes, CF<sub>3</sub>SO<sub>3</sub>H (90 μL, 1 mmol) was added to the mixture and the color changed from dark green to brown. And after being stirred for 10 minutes, DDQ (56 mg, 0.25 mmol) and 4-(N, N-diphenylamino) benzaldehyde (69 mg, 0.25 mmol) were added to the mixture and stirred in an oil bath at 100 °C for 120 minutes. The mixture was cooled to room temperature and then added 20 mL carbon disulfide. Resulting solution was washed with water and then evaporated in vacuo. The residue was separated on a silica gel column with carbon disulfide/dichloromethane (1:1) as the eluent to give unreacted C<sub>60</sub> (6.3 mg, 18%) and **3ab** (30.2 mg, 51%) as black amorphous solid. <sup>1</sup>H NMR (400 MHz, CS<sub>2</sub>/d<sub>6</sub>-acetone) δ 10.50 (s, 1H), 9.78 (s, 1H), 8.41 (s, 1H), 8.03 (d,  $J = 8.8$  Hz, 2H), 7.74 (d,  $J = 2.4$  Hz, 1H), 7.65 (d,  $J = 8.8$  Hz, 2H), 7.38 – 7.33 (m, 3H), 7.29 - 7.26 (m, 1H), 7.23 (d,  $J = 8.4$  Hz, 2H), 7.19-7.17 (m, 3H), 7.09 (d,  $J = 8.8$  Hz, 2H). <sup>13</sup>C NMR (100 MHz, CS<sub>2</sub>/d<sub>6</sub>-acetone) (all 1C unless indicated) δ 188.36(acyl C), 157.01, 156.52, 152.79(aryl C), 151.50, 151.34, 149.19, 149.13, 148.95, 148.74, 147.69, 147.61, 147.53, 147.50, 147.42, 147.39, 147.33, 146.56, 146.41, 146.12, 146.07(aryl C, 2C), 145.70, 145.64, 145.57, 145.49, 145.28(3C), 145.19, 145.11, 145.03, 144.93(2C), 144.87(2C), 144.74(2C), 144.62, 144.58, 144.54, 144.30, 143.84, 143.74(3C), 143.69(2C), 143.30, 143.20, 143.16, 143.11, 143.09, 142.96(aryl C), 142.73, 142.57, 141.90, 141.57, 139.27, 139.16, 138.23, 137.92, 137.04, 136.53(aryl C), 131.49(aryl C, 2C), 130.67(aryl C), 130.42(aryl C, 2C), 129.58(aryl C, 2C), 128.04(aryl C), 126.77(aryl C, 2C), 126.50(aryl C, 2C), 126.08(aryl C), 125.72(aryl C), 125.66(aryl C), 123.54(aryl C),

120.91(aryl C, 2C), 115.85(aryl C), 114.62(aryl C), 114.10(aryl C), 61.72(sp<sup>3</sup>-C of C<sub>60</sub>), 56.75(sp<sup>3</sup>-C of C<sub>60</sub>). HRMS (MALDI-TOF-MS, DCTB as matrix, negative mode): m/z [M]<sup>-</sup> calcd for C<sub>87</sub>H<sub>19</sub>BrON<sub>2</sub> 1188.0673; found 1188.0665.

### Synthesis of **3fb**

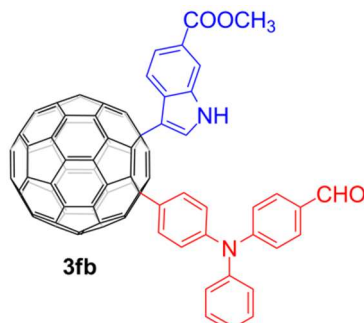

C<sub>60</sub> (36.0 mg, 0.05 mmol), methyl indole-6-carboxylate (10.2 mg, 0.06 mmol), KO<sup>t</sup>Bu (11.2 mg, 0.1 mmol) were dissolved in 1,2-dichlorobenzene (8 mL) at room temperature under Ar atmosphere. Then DMSO (2 mL) was added to the mixture and the color of the solution changed gradually from purple to dark green. After being stirred for 30 minutes, CF<sub>3</sub>SO<sub>3</sub>H (90 μL, 1 mmol) was added to the mixture and the color changed from dark green to brown. And after being stirred for 10 minutes, DDQ (56 mg, 0.25 mmol) and 4-(N, N-diphenylamino) benzaldehyde (69 mg, 0.25 mmol) were added to the mixture and stirred in an oil bath at 150 °C for 60 minutes. The mixture was cooled to room temperature and then added 20 mL carbon disulfide. Resulting solution was washed with water and then evaporated in vacuo. The residue was separated on a silica gel column with carbon disulfide/dichloromethane (1:1) as the eluent to give unreacted C<sub>60</sub> (4.5 mg, 15%) and **3fb** (20.2 mg, 35%) as black amorphous solid. <sup>1</sup>H NMR (400 MHz, CS<sub>2</sub>/d<sub>6</sub>-DMSO) δ 11.71(s, 1H), 9.98(s, 1H), 8.30 (d, J = 8.4 Hz, 1H), 8.21 (s, 1H), 8.07 (d, J = 8.4 Hz, 2H), 7.89 (s, 1H), 7.72-7.70 (m, 2H), 7.71 (d, J = 2.0 Hz, 1H), 7.39 - 7.37 (m, 2H), 7.26 (d, J = 8.4 Hz, 2H), 7.23-7.21 (m, 3H), 7.11 (d, J = 8.8 Hz, 2H) 3.92 (s, 3H). <sup>13</sup>C NMR (100 MHz, d<sub>6</sub>-DMSO) δ 187.59(acyl C), 165.88(acyl C), 156.02, 155.49, 151.57(aryl C), 150.58, 150.10, 147.92, 147.85, 147.78, 147.62, 146.41, 146.36, 146.28(3C), 146.23, 146.10(aryl C), 146.06(aryl C), 145.32, 145.14, 144.81(2C), 144.67, 144.44, 144.34, 144.05(2C), 144.02(2C), 143.91, 143.75, 143.67(2C), 143.62(3C), 143.48, 143.45, 143.30(3C), 143.26, 143.07(aryl C), 142.56, 142.47(4C), 142.38, 142.03, 141.92(2C), 141.89, 141.86, 141.64, 141.50, 141.32, 140.24, 138.08, 137.87, 136.90, 136.63, 136.16, 135.67(aryl C), 130.47(aryl C, 2C), 129.34(aryl C), 129.28(aryl C, 2C), 128.34(aryl C, 2C), 128.28(aryl C), 127.05(aryl C), 125.62(aryl C, 2C), 125.35(aryl C, 2C), 124.55(aryl C), 122.97(aryl C), 119.97(aryl C), 119.61(aryl C, 2C), 119.16(aryl C), 114.39(aryl C), 114.26(aryl C), 60.45(sp<sup>3</sup>-C of C<sub>60</sub>), 55.68(sp<sup>3</sup>-C of C<sub>60</sub>), 50.69(-OCH<sub>3</sub>). HRMS (MALDI-TOF-MS, DCTB as matrix, negative mode): m/z [M]<sup>-</sup> calcd for C<sub>89</sub>H<sub>22</sub>O<sub>3</sub>N<sub>2</sub> 1166.1636; found 1166.1651.

## Synthesis of 3ac

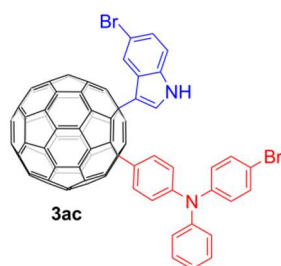

C<sub>60</sub> (36.0 mg, 0.05 mmol), 5-bromoindole (12 mg, 0.06 mmol), KO<sup>t</sup>Bu (11.2 mg, 0.1 mmol) were dissolved in chlorobenzene (8 mL) at room temperature under Ar atmosphere. Then DMSO (2 mL) was added to the mixture and the color of the solution changed gradually from purple to dark green. After being stirred for 30 minutes, CF<sub>3</sub>SO<sub>3</sub>H (90 μL, 1 mmol) was added to the mixture and the color changed from dark green to brown. And after being stirred for 10 minutes, DDQ (56 mg, 0.25 mmol) and 4-bromotriphenylamine (81 mg, 0.25 mmol) were added to the mixture and stirred in an oil bath at 110 °C for 60 minutes. The mixture was cooled to room temperature and then added 20 mL carbon disulfide. Resulting solution was washed with water and then evaporated in vacuo. The residue was separated on a silica gel column with carbon disulfide/dichloromethane (10:1) as the eluent to give unreacted C<sub>60</sub> (4 mg, 11%) and **3ac** (31 mg, 50%) as black amorphous solid. <sup>1</sup>H NMR (400 MHz, CS<sub>2</sub>/d<sub>6</sub>-acetone) δ 10.47 (s, 1H), 8.41 (s, 1H), 7.95 (d, *J* = 8.4 Hz, 2H), 7.73 (d, *J* = 2.8 Hz, 1H), 7.37 (d, *J* = 8.8 Hz, 1H), 7.33 (d, *J* = 8.8 Hz, 2H), 7.29 - 7.25 (m, 3H), 7.13-7.09 (m, 4H), 7.05 (t, *J* = 7.2 Hz, 1H), 6.99 (d, *J* = 8.8 Hz, 2H). <sup>13</sup>C NMR (100 MHz, CS<sub>2</sub>/d<sub>6</sub>-acetone) (all 1C unless indicated) δ 157.03, 156.76, 151.53, 151.50, 149.13, 149.09, 148.95, 148.76, 147.64, 147.57, 147.52, 147.50, 147.47(2C), 147.42, 147.34, 147.28, 147.20, 146.87, 146.07, 146.02(aryl C), 145.73, 145.62, 145.60, 145.37, 145.27(2C), 145.24, 145.13, 144.97, 144.90(2C), 144.83(2C), 144.76, 144.74, 144.68, 144.58, 144.51(3C), 144.32, 143.79(aryl C), 143.69(3C), 143.63(2C), 143.25, 143.16, 143.12, 143.09(2C), 142.92(aryl C), 142.70, 142.54, 141.48, 139.18, 139.16, 138.10, 137.89, 136.49(aryl C), 135.19(aryl C), 132.84(aryl C, 2C), 130.15(aryl C, 2C), 129.33(aryl C, 2C), 128.04(aryl C), 126.02(aryl C), 125.91(aryl C, 2C), 125.67(aryl C), 125.33(aryl C, 2C), 124.51(aryl C, 2C), 124.35(aryl C), 123.53(aryl C), 116.21(aryl C), 115.90(aryl C), 114.56(aryl C), 114.07(aryl C), 61.74(sp<sup>3</sup>-C of C<sub>60</sub>), 56.70(sp<sup>3</sup>-C of C<sub>60</sub>). HRMS (MALDI-TOF-MS, DCTB as matrix, negative mode): *m/z* [M]<sup>-</sup> calcd for C<sub>86</sub>H<sub>18</sub>Br<sub>2</sub>N<sub>2</sub> 1237.9838; found 1237.9826.

## Synthesis of 3fc

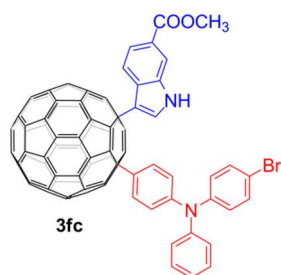

C<sub>60</sub> (36.0 mg, 0.05 mmol), methyl indole-6-carboxylate (10.2 mg, 0.06 mmol), KO<sup>t</sup>Bu (11.2 mg, 0.1 mmol) were dissolved in chlorobenzene (8 mL) at room temperature under Ar atmosphere. Then DMSO (2 mL) was added to the mixture and the color of the solution changed gradually from purple to dark green. After being stirred for 30 minutes, CF<sub>3</sub>SO<sub>3</sub>H (90 μL, 1 mmol) was added to the mixture and the color changed from dark green to brown. And after being stirred for 10 minutes, DDQ (56 mg, 0.25 mmol) and 4-bromotriphenylamine (81 mg, 0.25 mmol) were added to the mixture and stirred in an oil bath at 110 °C for 60 minutes. The mixture was cooled to room temperature and then added 20 mL carbon disulfide. Resulting solution was washed with water and then evaporated in vacuo. The residue was separated on a silica gel column with carbon disulfide/dichloromethane (2:1) as the eluent to give unreacted C<sub>60</sub> (5.3 mg, 15%) and **3fc** (35 mg, 58%) as black amorphous solid. <sup>1</sup>H NMR (400 MHz, CS<sub>2</sub>/d<sub>6</sub>-acetone) δ 10.79 (s, 1H), 8.35 (d, *J* = 8.4 Hz, 1H), 8.17 (s, 1H), 7.99 (d, *J* = 8.0 Hz, 2H), 7.95 (d, *J* = 2.4 Hz, 1H), 7.76 (d, *J* = 8.4 Hz, 1H), 7.35 (d, *J* = 8.4 Hz, 2H), 7.29 (t, *J* = 7.8 Hz, 2H), 7.15 (d, *J* = 8.8 Hz, 2H), 7.12 (d, *J* = 8.0 Hz, 2H), 7.07 (t, *J* = 7.6 Hz, 1H), 7.01 (d, *J* = 8.8 Hz, 2H), 3.89 (s, 3H). <sup>13</sup>C NMR (100 MHz, CS<sub>2</sub>/d<sub>6</sub>-acetone) (all 1C unless indicated) δ 167.02(acyl), 157.32, 157.12, 151.79, 151.71, 149.26, 149.23, 149.17, 149.00, 147.76, 147.73(2C), 147.63(4C), 147.46, 147.42, 147.33(2C), 147.03, 146.18, 146.17, 145.78(aryl C), 145.74, 145.70(2C), 145.43, 145.41, 145.38, 145.31, 145.07, 145.03(2C), 144.99(aryl C), 144.95(2C), 144.88, 144.76, 144.68, 144.65, 144.61(2C), 144.49, 143.90, 143.80(3C), 143.76(2C), 143.38, 143.28(2C), 143.24(2C), 142.98(aryl C), 142.86, 142.69, 141.56, 139.34, 138.13, 138.00, 137.33(aryl C), 135.13(aryl C), 132.95(aryl C, 2C), 130.27(aryl C, 2C), 129.66(aryl C), 129.37(aryl C, 2C), 127.94(aryl C), 126.05(aryl C, 2C), 125.48(aryl C, 2C), 124.83(aryl C), 124.64(aryl C, 2C), 124.50(aryl C), 121.59(aryl C), 120.71(aryl C), 116.5(aryl C), 116.25(aryl C), 115.13(aryl C), 61.90(sp<sup>3</sup>-C of C<sub>60</sub>), 56.92(sp<sup>3</sup>-C of C<sub>60</sub>), 51.89(-OCH<sub>3</sub>). HRMS (MALDI-TOF-MS, DCTB as matrix, negative mode): *m/z* [M]<sup>-</sup> calcd for C<sub>88</sub>H<sub>21</sub>BrO<sub>2</sub>N<sub>2</sub> 1218.0779; found 1218.0765.

### Synthesis of **3ad**

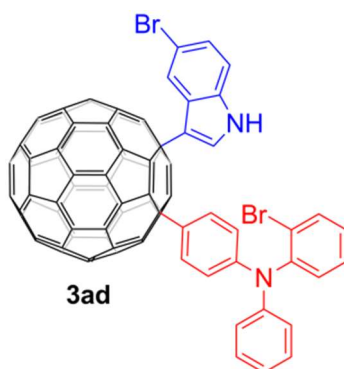

C<sub>60</sub> (36.0 mg, 0.05 mmol), 5-bromoindole (12 mg, 0.06 mmol), KO<sup>t</sup>Bu (11.2 mg, 0.1 mmol) were dissolved in chlorobenzene (8 mL) at room temperature under Ar atmosphere. Then DMSO (2 mL) was added to the mixture and the color of the solution changed gradually from purple to dark green. After being stirred for 30 minutes, CF<sub>3</sub>SO<sub>3</sub>H (90 μL, 1 mmol) was added to the mixture and the color changed

from dark green to brown. And after being stirred for 10 minutes, DDQ (56 mg, 0.25 mmol) and 2-bromotriphenylamine (81 mg, 0.25 mmol) were added to the mixture and stirred in an oil bath at 130 °C for 60 minutes. The mixture was cooled to room temperature and then added 20 mL carbon disulfide. Resulting solution was washed with water and then evaporated in vacuo. The residue was separated on a silica gel column with carbon disulfide/dichloromethane (10:1) as the eluent to give unreacted C<sub>60</sub> (4 mg, 11%) and **3ad** (40 mg, 65%) as black amorphous solid. <sup>1</sup>H NMR (400 MHz, CS<sub>2</sub>/d<sub>6</sub>-acetone) δ 10.48 (s, 1H), 8.41 (s, 1H), 7.90 (d, *J* = 8.8 Hz, 2H), 7.71 (d, *J* = 2.4 Hz, 1H), 7.65 (d, *J* = 8.0 Hz, 1H), 7.41 - 7.35 (m, 2H), 7.28 - 7.26 (m, 2H), 7.24 - 7.16 (m, 3H), 7.01 - 6.96 (m, 5H). <sup>13</sup>C NMR (100 MHz, CS<sub>2</sub>/d<sub>6</sub>-acetone) (all 1C unless indicated) δ 157.05(2C), 151.72, 151.58, 149.11, 149.08, 148.97, 148.85, 147.62, 147.58(2C), 147.50(2C), 147.47, 147.33, 147.26, 147.17, 146.62, 146.05, 146.00(aryl C), 145.91, 145.60(2C), 145.43, 145.32, 145.30(2C), 145.25, 145.22, 144.95(2C), 144.92(2C), 144.84(3C), 144.76, 144.67, 144.57, 144.53(2C), 144.48, 144.37, 143.79(aryl C), 143.70, 143.67, 143.64, 143.61(2C), 143.23, 143.15, 143.12(2C), 142.89(aryl C), 142.71, 142.55, 141.43, 139.24, 139.09, 138.04, 137.98, 136.50(aryl C), 135.04(aryl C), 133.81(aryl C), 132.19(aryl C), 129.75(aryl C, 2C), 129.47(aryl C), 128.99(aryl C, 2C), 128.06(aryl C, 2C), 125.93(aryl C), 125.77(aryl C), 124.55(aryl C), 123.50(aryl C), 123.34(aryl C), 123.24(aryl C, 2C), 122.03(aryl C, 2C), 115.84(aryl C), 114.49(aryl C), 114.11(aryl C), 61.79(sp<sup>3</sup>-C of C<sub>60</sub>), 56.72(sp<sup>3</sup>-C of C<sub>60</sub>). HRMS (MALDI-TOF-MS, DCTB as matrix, negative mode): *m/z* [M]<sup>-</sup> calcd for C<sub>86</sub>H<sub>18</sub>Br<sub>2</sub>N<sub>2</sub> 1237.9838; found 1237.9847.

### Synthesis of **3fd**

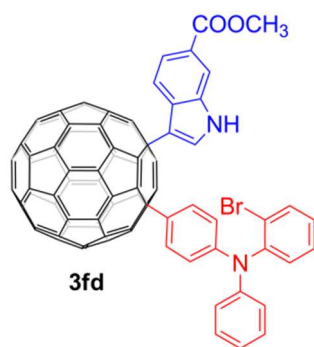

C<sub>60</sub> (36.0 mg, 0.05 mmol), methyl indole-6-carboxylate (10.2 mg, 0.06 mmol), KO<sup>t</sup>Bu (11.2 mg, 0.1 mmol) were dissolved in chlorobenzene (8 mL) at room temperature under Ar atmosphere. Then DMSO (2 mL) was added to the mixture and the color of the solution changed gradually from purple to dark green. After being stirred for 30 minutes, CF<sub>3</sub>SO<sub>3</sub>H (90 μL, 1 mmol) was added to the mixture and the color changed from dark green to brown. And after being stirred for 10 minutes, DDQ (56 mg, 0.25 mmol) and 2-bromotriphenylamine (81 mg, 0.25 mmol) were added to the mixture and stirred in an oil bath at 130 °C for 60 minutes. The mixture was cooled to room temperature and then added 20 mL carbon disulfide. Resulting solution was washed with water and then evaporated in vacuo. The residue was separated on a silica gel column with carbon disulfide/dichloromethane (2:1) as the eluent to give unreacted

C<sub>60</sub> (6 mg, 17%) and **3fd** (40.2 mg, 66%) as black amorphous solid. <sup>1</sup>H NMR (400 MHz, CS<sub>2</sub>/d<sub>6</sub>-acetone) δ 10.74 (s, 1H), 8.34 (d, *J* = 8.4 Hz, 1H), 8.15 (s, 1H), 7.93 - 7.89 (m, 3H), 7.75 (d, *J* = 8.4 Hz, 1H), 7.65 (d, *J* = 8.0 Hz, 1H), 7.40 (t, *J* = 7.2 Hz, 1H), 7.29 (d, *J* = 7.6 Hz, 1H), 7.24 - 7.17 (m, 3H), 7.01 (d, *J* = 8.0 Hz, 2H), 6.98 (d, *J* = 8.4 Hz, 3H), 3.88 (s, 3H). <sup>13</sup>C NMR (100 MHz, CS<sub>2</sub>/d<sub>6</sub>-acetone) (all 1C unless indicated) δ 167.02(acyl C), 157.30, 157.25, 151.85, 151.77, 149.19(2C), 149.14, 149.02, 147.70, 147.66(2C), 147.58(2C), 147.41, 147.36(2C), 146.69, 146.13(2C), 145.94(aryl C), 145.67(2C), 145.55, 145.48, 145.40(2C), 145.34(2C), 145.01(3C), 144.95(2C), 144.90, 144.86, 144.70, 144.64(2C), 144.58, 144.55, 144.50, 143.85(aryl C), 143.80, 143.71(4C), 143.32, 143.23(4C), 142.92(aryl C), 142.83, 142.65, 141.49, 139.36, 139.23, 138.05, 137.29, 135.11, 133.70(aryl C), 132.29(aryl C), 129.82(aryl C, 3C), 129.66(aryl C), 129.60(aryl C), 129.01(aryl C, 2C), 128.21(aryl C), 127.92(aryl C), 124.75(aryl C), 124.63(aryl C), 123.45(aryl C), 123.38(aryl C, 3C), 122.05(aryl C, 2C), 121.59(aryl C), 120.71(aryl C), 116.55(aryl C), 115.09(aryl C), 61.89(sp<sup>3</sup>-C of C<sub>60</sub>), 56.88(sp<sup>3</sup>-C of C<sub>60</sub>), 51.85(-OCH<sub>3</sub>). HRMS (MALDI-TOF-MS, DCTB as matrix, negative mode): *m/z* [M]<sup>-</sup> calcd for C<sub>88</sub>H<sub>21</sub>BrO<sub>2</sub>N<sub>2</sub> 1218.0779; found 1218.0791.

### Synthesis of **3ae**

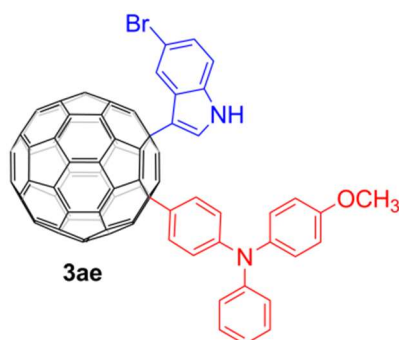

C<sub>60</sub> (36.0 mg, 0.05 mmol), 5-bromoindole (12 mg, 0.06 mmol), KO<sup>t</sup>Bu (11.2 mg, 0.1 mmol) were dissolved in chlorobenzene (8 mL) at room temperature under Ar atmosphere. Then DMSO (2 mL) was added to the mixture and the color of the solution changed gradually from purple to dark green. After being stirred for 30 minutes, CF<sub>3</sub>SO<sub>3</sub>H (90 μL, 1 mmol) was added to the mixture and the color changed from dark green to brown. And after being stirred for 10 minutes, DDQ (56 mg, 0.25 mmol) and 4-methoxytriphenylamine (68 mg, 0.25 mmol) were added to the mixture and stirred in an oil bath at 130 °C for 60 minutes. The mixture was cooled to room temperature and then added 20 mL carbon disulfide. Resulting solution was washed with water and then evaporated in vacuo. The residue was separated on a silica gel column with carbon disulfide/dichloromethane (2:1) as the eluent to give unreacted C<sub>60</sub> (5 mg, 14%) and **3ae** (45 mg, 76%) as black amorphous solid. <sup>1</sup>H NMR (400 MHz, CS<sub>2</sub>/d<sub>6</sub>-acetone) δ 10.51 (s, 1H), 8.41 (s, 1H), 7.87 (d, *J* = 8.4 Hz, 2H), 7.74 (d, *J* = 2.4 Hz, 1H), 7.38 (d, *J* = 8.4 Hz, 1H), 7.27 (dd, *J* = 8.8, 1.2 Hz, 1H), 7.20 (t, *J* = 7.8 Hz, 2H), 7.04 (dd, *J* = 8.0, 2.4 Hz, 6H), 6.95 (t, *J* = 7.2 Hz, 1H), 6.83 (d, *J* = 8.8 Hz, 2H), 3.79 (s, 3H). <sup>13</sup>C NMR (100 MHz, CS<sub>2</sub>/d<sub>6</sub>-acetone) (all 1C unless indicated) δ 157.14(2C), 157.01(aryl C), 151.84, 151.63, 149.15(2C), 149.05, 148.89, 148.41,



147.95, 147.66, 147.62(2C), 147.54(2C), 147.51, 147.37, 147.31, 146.10, 146.05(aryl C, 2C), 145.65, 145.63, 145.34(2C), 145.29(3C), 145.00, 144.96(2C), 144.89, 144.86(2C), 144.81, 144.73, 144.64, 144.59, 144.56, 144.53, 144.43, 143.83, 143.74, 143.72, 143.66(3C), 143.28, 143.17(4C), 142.95, 142.76, 142.59, 141.47, 140.44, 139.31, 139.12, 138.07, 138.00(aryl C), 136.59(aryl C), 133.54(aryl C), 129.86(aryl C, 2C), 129.05(aryl C, 2C), 128.14(aryl C), 128.00(aryl C, 2C), 125.98(aryl C), 125.87(aryl C), 124.14(aryl C, 2C), 123.57(aryl C), 123.18(aryl C), 122.77(aryl C, 2C), 115.95(aryl C), 115.51(aryl C, 2C), 114.50(aryl C), 114.19(aryl C), 61.88(sp<sup>3</sup>-C of C<sub>60</sub>), 56.77(sp<sup>3</sup>-C of C<sub>60</sub>), 55.53(-OCH<sub>3</sub>). UV-vis (CHCl<sub>3</sub>) λ<sub>max</sub> 449, 540, 683 nm; HRMS (MALDI-TOF-MS, DCTB as matrix, negative mode): m/z [M]<sup>-</sup> calcd for C<sub>87</sub>H<sub>21</sub>BrON<sub>2</sub> 1190.0829; found 1190.0819.

### Synthesis of 3fe

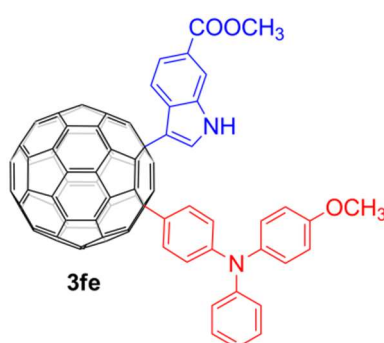

C<sub>60</sub> (36.0 mg, 0.05 mmol), methyl indole-6-carboxylate (10.2 mg, 0.06 mmol), KO<sup>t</sup>Bu (11.2 mg, 0.1 mmol) were dissolved in chlorobenzene (8 mL) at room temperature under Ar atmosphere. Then DMSO (2 mL) was added to the mixture and the color of the solution changed gradually from purple to dark green. After being stirred for 30 minutes, CF<sub>3</sub>SO<sub>3</sub>H (90 μL, 1 mmol) was added to the mixture and the color changed from dark green to brown. And after being stirred for 10 minutes, DDQ (56 mg, 0.25 mmol) and 4-methoxytriphenylamine (68 mg, 0.25 mmol) were added to the mixture and stirred in an oil bath at 130 °C for 60 minutes. The mixture was cooled to room temperature and then added 20 mL carbon disulfide. Resulting solution was washed with water and then evaporated in vacuo. The residue was separated on a silica gel column with carbon disulfide/dichloromethane /ethyl acetate(12:5:1) as the eluent to give unreacted C<sub>60</sub> (5 mg, 14%) and **3fe** (45 mg, 77%) as black amorphous solid. <sup>1</sup>H NMR (400 MHz, CS<sub>2</sub>/d<sub>6</sub>-acetone) δ 10.69 (s, 1H), 8.33 (d, *J* = 8.4 Hz, 1H), 8.15 (s, 1H), 7.89 (d, *J* = 2.0 Hz, 2H), 7.87 (s, 1H), 7.75 (d, *J* = 8.4 Hz, 1H), 7.20 (t, *J* = 7.8 Hz, 2H), 7.05 (d, *J* = 8.0 Hz, 6H), 6.94 (t, *J* = 7.2 Hz, 1H), 6.82 (d, *J* = 8.8 Hz, 2H), 3.88 (s, 3H), 3.79 (s, 3H). <sup>13</sup>C NMR (100 MHz, CS<sub>2</sub>/d<sub>6</sub>-acetone) (all 1C unless indicated) δ 167.02(acyl C), 157.28, 157.22, 157.03, 151.85, 151.71, 149.15(2C), 149.12, 148.97, 148.50, 147.96, 147.67, 147.64, 147.60(2C), 147.54(2C), 147.38, 147.33, 146.08(2C), 145.96(aryl C), 145.64(2C), 145.44, 145.36(2C), 145.31, 145.28, 144.98(3C), 144.92, 144.89, 144.87, 144.83, 144.67, 144.63, 144.59, 144.54, 144.51, 144.47, 143.82, 143.76, 143.73, 143.68(3C), 143.29, 143.20(4C), 142.90(aryl C), 142.81, 142.62, 141.46, 140.46, 139.34, 139.18(aryl C), 137.99, 137.27(aryl C),

133.41(aryl C), 129.86(aryl C, 2C), 129.66(aryl C), 128.99(aryl C, 2C), 127.99(aryl C, 3C), 127.85(aryl C), 124.76(aryl C), 124.16(aryl C, 2C), 123.20(aryl C), 122.84(aryl C, 2C), 121.60(aryl C), 120.73(aryl C), 116.63(aryl C), 115.53(aryl C, 2C), 115.07(aryl C), 61.89(sp<sup>3</sup>-C of C<sub>60</sub>), 56.83(sp<sup>3</sup>-C of C<sub>60</sub>), 55.53(-OCH<sub>3</sub>), 51.84(-OCH<sub>3</sub>). HRMS (MALDI-TOF-MS, DCTB as matrix, negative mode): m/z [M]<sup>-</sup> calcd for C<sub>89</sub>H<sub>24</sub>O<sub>3</sub>N<sub>2</sub> 1168.1792; found 1168.1788.

### Synthesis of **3af**

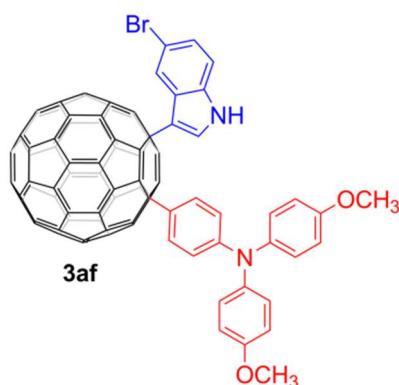

C<sub>60</sub> (36.0 mg, 0.05 mmol), 5-bromoindole (12 mg, 0.06 mmol), KO<sup>t</sup>Bu (11.2 mg, 0.1 mmol) were dissolved in chlorobenzene (8 mL) at room temperature under Ar atmosphere. Then DMSO (2 mL) was added to the mixture and the color of the solution changed gradually from purple to dark green. After being stirred for 30 minutes, CF<sub>3</sub>SO<sub>3</sub>H (90 μL, 1 mmol) was added to the mixture and the color changed from dark green to brown. And after being stirred for 10 minutes, DDQ (56 mg, 0.25 mmol) and 4,4'-dimethoxytriphenylamine (76 mg, 0.25 mmol) were added to the mixture and stirred in an oil bath at 130 °C for 60 minutes. The mixture was cooled to room temperature and then added 20 mL carbon disulfide. Resulting solution was washed with water and then evaporated in vacuo. The residue was separated on a silica gel column with carbon disulfide/dichloromethane (2:1) as the eluent to give unreacted C<sub>60</sub> (3.8 mg, 11%) and **3af** (48 mg, 79%) as black amorphous solid. <sup>1</sup>H NMR (400 MHz, CS<sub>2</sub>/d<sub>6</sub>-DMSO) δ 11.47 (s, 1H), 8.38 (s, 1H), 7.85 (d, *J* = 7.2 Hz, 2H), 7.72 (s, 1H), 7.44 (d, *J* = 8.8 Hz, 1H), 7.28 (d, *J* = 8.8 Hz, 1H), 7.07 (d, *J* = 7.6 Hz, 4H), 6.97 (d, *J* = 7.2 Hz, 2H), 6.84 (d, *J* = 7.6 Hz, 4H), 3.80 (s, 6H). <sup>13</sup>C NMR (100 MHz, CS<sub>2</sub>/d<sub>6</sub>-DMSO) (all 1C unless indicated) δ 156.02(2C), 155.27(aryl C, 2C), 150.63, 150.55, 147.83, 147.81, 147.79, 147.65(2C), 146.35(2C), 146.29(2C), 146.23, 146.20, 146.06, 145.99(aryl C), 144.78, 144.75, 144.73, 144.32, 144.31, 144.10, 144.04(3C), 144.01, 143.68(3C), 143.59(2C), 143.56, 143.52, 143.45, 143.30(2C), 143.27, 143.20, 143.15, 142.53, 142.44, 142.40, 142.34(3C), 141.97, 141.90(3C), 141.86, 141.66, 141.48, 141.29, 140.11, 139.44(aryl C, 2C), 137.99, 137.80, 136.71, 136.66, 135.44(aryl C), 131.02(aryl C), 127.73(aryl C, 2C), 126.82(aryl C), 126.07(aryl C, 4C), 124.99(aryl C), 124.28(aryl C), 122.02(aryl C), 119.69(aryl C, 2C), 114.26(aryl C, 4C), 113.92(aryl C), 113.37(aryl C), 112.91(aryl C), 60.58(sp<sup>3</sup>-C of C<sub>60</sub>), 55.60(sp<sup>3</sup>-C of C<sub>60</sub>), 54.44(-OCH<sub>3</sub>, 2C). UV-vis (CHCl<sub>3</sub>) λ<sub>max</sub> 449, 541, 682

nm;HRMS (MALDI-TOF-MS, DCTB as matrix, negative mode):  $m/z$   $[M]^-$  calcd for  $C_{88}H_{23}BrO_2N_2$  1220.0935; found 1220.0926.

### Synthesis of 3ff

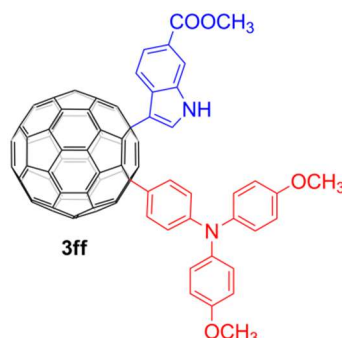

$C_{60}$  (36.0 mg, 0.05 mmol), methyl indole-6-carboxylate (10.2 mg, 0.06 mmol), KO<sup>t</sup>Bu (11.2 mg, 0.1 mmol) were dissolved in chlorobenzene (8 mL) at room temperature under Ar atmosphere. Then DMSO (2 mL) was added to the mixture and the color of the solution changed gradually from purple to dark green. After being stirred for 30 minutes,  $CF_3SO_3H$  (90  $\mu$ L, 1 mmol) was added to the mixture and the color changed from dark green to brown. And after being stirred for 10 minutes, DDQ (56 mg, 0.25 mmol) and 4,4'-dimethoxytriphenylamine (76 mg, 0.25 mmol) were added to the mixture and stirred in an oil bath at 130 °C for 60 minutes. The mixture was cooled to room temperature and then added 20 mL carbon disulfide. Resulting solution was washed with water and then evaporated in vacuo. The residue was separated on a silica gel column with carbon disulfide/dichloromethane /ethyl acetate(12:5:1) as the eluent to give unreacted  $C_{60}$  (4.2 mg, 12%) and **3ff** (47.4 mg, 79%) as black amorphous solid.  $^1H$  NMR (400 MHz,  $CS_2/d_6$ -acetone)  $\delta$  10.30 (s, 1H), 8.24 (d,  $J$  = 8.4 Hz, 1H), 8.09 (s, 1H), 7.68 - 7.45 (m, 4H), 6.94 (d,  $J$  = 8.8 Hz, 4H), 6.87 (d,  $J$  = 8.4 Hz, 2H), 6.70 (d,  $J$  = 8.4 Hz, 4H), 3.83 (s, 3H), 3.69 (s, 6H).  $^{13}C$  NMR (100 MHz,  $CS_2/d_6$ -acetone) (all 1C unless indicated)  $\delta$  166.95(acyl C), 157.34, 157.16, 156.53(aryl C, 2C), 151.92, 151.64, 149.12(2C), 149.08, 149.00, 148.93, 147.61(2C), 147.56(2C), 147.51(2C), 147.35, 147.29, 146.04(3C), 145.62, 145.59, 145.33(2C), 145.27(3C), 144.94(3C), 144.90, 144.82(3C), 144.60(2C), 144.56, 144.51, 144.46(2C), 143.78, 143.70(2C), 143.65(3C), 143.26, 143.17(4C), 142.87(aryl C), 142.79, 142.58, 141.41, 140.74(aryl C, 2C), 139.32, 139.10, 137.97, 137.90, 137.19(aryl C), 132.20(aryl C), 129.61(aryl C), 128.84(aryl C, 2C), 127.70(aryl C), 127.16(aryl C, 4C), 124.75(aryl C), 121.59(aryl C), 121.16(aryl C, 2C), 120.74(aryl C), 116.71(aryl C), 115.34(aryl C, 4C), 115.00(aryl C), 61.84( $sp^3$ -C of  $C_{60}$ ), 56.73( $sp^3$ -C of  $C_{60}$ ), 55.47(-OCH<sub>3</sub>, 2C), 51.82(-OCH<sub>3</sub>). HRMS (MALDI-TOF-MS, DCTB as matrix, negative mode):  $m/z$   $[M]^-$  calcd for  $C_{90}H_{26}O_4N_2$  1198.1887; found 1198.1893.

### Synthesis of 3ag

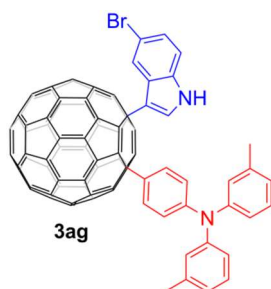

C<sub>60</sub> (36.0 mg, 0.05 mmol), 5-bromoindole (12 mg, 0.06 mmol), KO<sup>t</sup>Bu (11.2 mg, 0.1 mmol) were dissolved in chlorobenzene (8 mL) at room temperature under Ar atmosphere. Then DMSO (2 mL) was added to the mixture and the color of the solution changed gradually from purple to dark green. After being stirred for 30 minutes, CF<sub>3</sub>SO<sub>3</sub>H (90 μL, 1 mmol) was added to the mixture and the color changed from dark green to brown. And after being stirred for 10 minutes, DDQ (56 mg, 0.25 mmol) and 3,3'-dimethyltriphenylamine (68 mg, 0.25 mmol) were added to the mixture and stirred in an oil bath at 130 °C for 60 minutes. The mixture was cooled to room temperature and then added 20 mL carbon disulfide. Resulting solution was washed with water and then evaporated in vacuo. The residue was separated on a silica gel column with carbon disulfide/dichloromethane (2:1) as the eluent to give unreacted C<sub>60</sub> (6.6 mg, 19%) and **3ag** (40.6 mg, 68%) as black amorphous solid. <sup>1</sup>H NMR (400 MHz, CS<sub>2</sub>/d<sub>6</sub>-acetone) δ 10.40 (s, 1H), 8.36 (s, 1H), 8.06 (dd, J = 8.4 , 2.8 Hz, 1H), 7.65 (d, J = 2.8 Hz, 1H), 7.35 (dd, J = 8.4 , 2.8 Hz, 1H), 7.26 - 7.21 (m, 3H), 7.12 (td, J = 7.6, 2.8 Hz, 1H), 7.05 (d, J = 7.6 Hz, 2H), 7.00 - 6.95 (m, 2H), 6.89 (s, 3H), 6.82 (d, J = 5.6 Hz, 1H), 3.03 (s, 3H), 2.29 (s, 3H). <sup>13</sup>C NMR (100 MHz, CS<sub>2</sub>/d<sub>6</sub>-acetone) δ 157.02, 156.19, 152.06, 150.76, 149.19, 149.03, 148.77, 148.54, 147.97(2C), 147.77(3C), 147.64(4C), 147.52(2C), 147.32(2C), 146.46, 146.15, 146.10, 146.01(aryl C), 145.74(2C), 145.32(3C), 145.10, 145.00(4C), 144.85, 144.75, 144.70, 144.59, 144.25(2C), 144.15, 143.95(3C), 143.75, 143.70(2C), 143.51, 143.42, 143.24(2C), 143.13, 143.04, 142.84, 142.64, 142.44, 141.31(aryl C), 139.40, 139.27(aryl C, 2C), 138.95(aryl C), 138.85(aryl C), 138.11, 136.42(aryl C), 132.99(aryl C), 131.52(aryl C), 129.89(aryl C, 2C), 128.23(aryl C), 127.40(aryl C), 126.16(aryl C), 125.93(aryl C), 125.73(aryl C), 125.14(aryl C, 2C), 124.84(aryl C), 123.64(aryl C), 123.49(aryl C), 122.68(aryl C), 121.32(aryl C), 115.32(aryl C), 114.49(aryl C), 113.96(aryl C), 62.42(sp<sup>3</sup>-C of C<sub>60</sub>), 56.64(sp<sup>3</sup>-C of C<sub>60</sub>), 24.74(-CH<sub>3</sub>), 22.07(-CH<sub>3</sub>). HRMS (MALDI-TOF-MS, DCTB as matrix, negative mode): m/z [M]<sup>-</sup> calcd for C<sub>88</sub>H<sub>23</sub>BrN<sub>2</sub> 1188.1037; found 1186.1045.

### Synthesis of 3fg

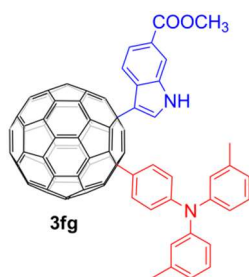

C<sub>60</sub> (36.0 mg, 0.05 mmol), methyl indole-6-carboxylate (10.2 mg, 0.06 mmol), KO<sup>t</sup>Bu (11.2 mg, 0.1 mmol) were dissolved in chlorobenzene (8 mL) at room temperature under Ar atmosphere. Then DMSO (2 mL) was added to the mixture and the color of the solution changed gradually from purple to dark green. After being stirred for 30 minutes, CF<sub>3</sub>SO<sub>3</sub>H (90 μL, 1 mmol) was added to the mixture and the color changed from dark green to brown. And after being stirred for 10 minutes, DDQ (56 mg, 0.25 mmol) and 3,3'-dimethyltriphenylamine (68 mg, 0.25 mmol) were added to the mixture and stirred in an oil bath at 130 °C for 60 minutes. The mixture was cooled to room temperature and then added 20 mL carbon disulfide. Resulting solution was washed with water and then evaporated in vacuo. The residue was separated on a silica gel column with carbon disulfide/dichloromethane (2:1) as the eluent to give unreacted C<sub>60</sub> (6.7 mg, 19%) and **3fg** (35.3 mg, 61%) as black amorphous solid. <sup>1</sup>H NMR (400 MHz, CS<sub>2</sub>/d<sub>6</sub>-acetone) δ 10.76 (s, 1H), 8.32 (d, J = 8.4 Hz, 1H), 8.16 (s, 1H), 8.11 (d, J = 8.4 Hz, 1H), 7.87 (d, J = 2,4 Hz, 1H), 7.76 (dd, J = 8.4, 1.2 Hz, 1H), 7.26 (t, J = 8.4 Hz, 2H), 7.15 (t, J = 8.0 Hz, 1H), 7.08 (d, J = 8.0 Hz, 2H), 7.04 - 6.98 (m, 2H), 6.92 (t, J = 8.4 Hz, 3H), 6.85 (d, J = 7.2 Hz, 1H), 3.88 (s, 3H), 3.04 (s, 3H), 2.29 (s, 3H). <sup>13</sup>C NMR (100 MHz, CS<sub>2</sub>/d<sub>6</sub>-acetone) (all 1C unless indicated) δ 166.74(acyl C), 156.91, 156.04, 151.86, 150.63, 148.90, 148.76, 148.56, 148.36, 147.82, 147.67, 147.53, 147.45(2C), 147.33(3C), 147.24(2C), 147.05, 146.99, 146.30, 145.90(aryl C), 145.79, 145.74, 145.44(2C), 145.08(3C), 144.87, 144.74, 144.71, 144.69, 144.66, 144.57, 144.47, 144.43, 144.32, 144.28, 143.97, 143.95, 143.90, 143.64(2C), 143.57, 143.46, 143.42, 143.35, 143.22, 143.13, 142.96(2C), 142.86, 142.69, 142.58, 142.38, 142.18(aryl C), 140.97(aryl C), 139.16(aryl C), 139.02(aryl C), 138.94, 138.61, 137.82, 136.87(aryl C), 132.47(aryl C), 131.26(aryl C), 129.65(aryl C, 2C), 129.61(aryl C), 129.45(aryl C), 127.64(aryl C), 126.85(aryl C), 125.90(aryl C), 124.94(aryl C, 2C), 124.62(aryl C), 124.33(aryl C), 123.46(aryl C), 122.45(aryl C), 121.19(aryl C), 120.94(aryl C), 120.26(aryl C), 115.68(aryl C), 114.67(aryl C), 62.18(sp<sup>3</sup>-C of C<sub>60</sub>), 56.45(sp<sup>3</sup>-C of C<sub>60</sub>), 51.55(-OCH<sub>3</sub>), 24.51(-CH<sub>3</sub>), 21.71(-CH<sub>3</sub>). HRMS (MALDI-TOF-MS, DCTB as matrix, negative mode): m/z [M]<sup>-</sup> calcd for C<sub>90</sub>H<sub>26</sub>N<sub>2</sub>O<sub>2</sub> 1166.2001; found 1166.2011.

### Synthesis of **3ah**

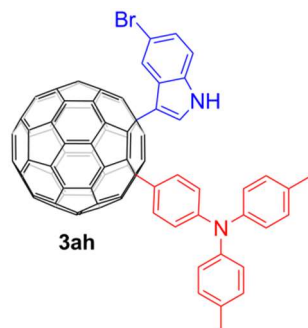

C<sub>60</sub> (36.0 mg, 0.05 mmol), 5-bromoindole (12 mg, 0.06 mmol), KO<sup>t</sup>Bu (11.2 mg, 0.1 mmol) were dissolved in chlorobenzene (8 mL) at room temperature under Ar atmosphere. Then DMSO (2 mL) was added to the mixture and the color of the solution changed gradually from purple to dark green. After being stirred for 30

minutes, CF<sub>3</sub>SO<sub>3</sub>H (90 μL, 1 mmol) was added to the mixture and the color changed from dark green to brown. And after being stirred for 10 minutes, DDQ (56 mg, 0.25 mmol) and 4,4'-dimethyltriphenylamine (68 mg, 0.25 mmol) were added to the mixture and stirred in an oil bath at 130 °C for 120 minutes. The mixture was cooled to room temperature and then added 20 mL carbon disulfide. Resulting solution was washed with water and then evaporated in vacuo. The residue was separated on a silica gel column with carbon disulfide/dichloromethane (10:1) as the eluent to give unreacted C<sub>60</sub> (5.8 mg, 16%) and **3ah** (42 mg, 71%) as black amorphous solid. <sup>1</sup>H NMR (400 MHz, CS<sub>2</sub>/d<sub>6</sub>-acetone) δ 10.38 (s, 1H), 8.40 (s, 1H), 7.85 (d, *J* = 8.4 Hz, 2H), 7.71 (d, *J* = 2.4 Hz, 1H), 7.36 (d, *J* = 8.4 Hz, 1H), 7.27 (d, *J* = 8.8 Hz, 1H), 7.04 (d, *J* = 2.8 Hz, 2H), 7.04-7.01 (m, 4H), 6.97 (d, *J* = 8.0 Hz, 4H), 2.34 (s, 6H). <sup>13</sup>C NMR (100 MHz, CS<sub>2</sub>/d<sub>6</sub>-acetone) (all 1C unless indicated) δ 157.00, 156.96, 151.71, 151.46, 149.03, 149.01, 148.91, 148.74, 148.23, 147.55, 147.50(2C), 147.42(3C), 147.26, 147.19, 145.99(aryl C), 145.93(2C), 145.54, 145.51, 145.22(2C), 145.17, 145.13(5C), 144.88, 144.84(2C), 144.77, 144.73(2C), 144.70, 144.60, 144.51, 144.46, 144.44, 144.39, 144.30, 143.72, 143.62(2C), 143.54(3C), 143.16, 143.08, 143.05(aryl C, 2C), 142.83, 142.64, 142.47, 141.36, 139.17, 138.99, 137.94, 137.89, 136.37(aryl C), 133.33(aryl C), 132.93(aryl C, 2C), 130.52(aryl C, 4C), 128.90(aryl C, 2C), 127.99(aryl C), 125.94(aryl C), 125.59(aryl C), 125.32(aryl C, 4C), 123.49(aryl C), 122.81(aryl C, 2C), 115.91(aryl C), 114.52(aryl C), 113.95(aryl C), 61.74(sp<sup>3</sup>-C of C<sub>60</sub>), 56.61(sp<sup>3</sup>-C of C<sub>60</sub>), 21.58(-CH<sub>3</sub>, 2C). UV-vis (CHCl<sub>3</sub>) λ<sub>max</sub> 449, 543, 685 nm; HRMS (MALDI-TOF-MS, DCTB as matrix, negative mode): *m/z* [M]<sup>-</sup> calcd for C<sub>88</sub>H<sub>23</sub>BrN<sub>2</sub> 1188.1037; found 1188.1028.

### Synthesis of **3ai**

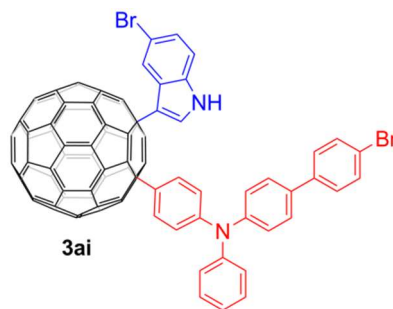

C<sub>60</sub> (36.0 mg, 0.05 mmol), 5-bromoindole (12 mg, 0.06 mmol), KO<sup>t</sup>Bu (11.2 mg, 0.1 mmol) were dissolved in chlorobenzene (8 mL) at room temperature under Ar atmosphere. Then DMSO (2 mL) was added to the mixture and the color of the solution changed gradually from purple to dark green. After being stirred for 30 minutes, CF<sub>3</sub>SO<sub>3</sub>H (90 μL, 1 mmol) was added to the mixture and the color changed from dark green to brown. And after being stirred for 10 minutes, DDQ (56 mg, 0.25 mmol) and 4-bromo-4'-(diphenylamino)biphenyl (100 mg, 0.25 mmol) were added to the mixture and stirred in an oil bath at 130 °C for 60 minutes. The mixture was cooled to room temperature and then added 20 mL carbon disulfide. Resulting solution was washed with water and then evaporated in vacuo. The residue was separated on a silica gel column with carbon disulfide/dichloromethane (10:1) as the

eluent to give unreacted C<sub>60</sub> (8 mg, 22%) and **3ai** (32.7 mg, 50%) as black amorphous solid. <sup>1</sup>H NMR (400 MHz, CS<sub>2</sub>/d<sub>6</sub>-acetone) δ 10.59 (s, 1H), 8.43 (s, 1H), 7.97 (d, *J* = 8.0 Hz, 2H), 7.79 (s, 1H), 7.53-7.45 (m, 6H), 7.40 (d, *J* = 8.4 Hz, 1H), 7.29 (t, *J* = 8.0 Hz, 3H), 7.20-7.12 (m, 6H), 7.07 (t, *J* = 7.2 Hz, 1H). <sup>13</sup>C NMR (100 MHz, CS<sub>2</sub>/d<sub>6</sub>-acetone) (all 1C unless indicated) δ 157.19, 156.97, 151.71, 151.64, 149.20, 149.16, 149.08, 148.89, 147.79, 147.72, 147.64(2C), 147.57, 147.54, 147.53, 147.48(2C), 147.41, 147.35, 146.14, 146.09, 145.92(aryl C), 145.69, 145.67, 145.44, 145.36(2C), 145.32, 145.28, 145.04(aryl C), 144.98(2C), 144.92, 144.90, 144.88, 144.83, 144.77, 144.66, 144.59(3C), 144.42, 143.87, 143.77(2C), 143.73, 143.70(2C), 143.32, 143.24, 143.19(3C), 142.99(aryl C), 142.78, 142.62, 141.53, 139.86, 139.30, 139.21, 138.18(aryl C), 137.97(aryl C), 136.63, 135.00(aryl C), 134.65(aryl C), 132.46(aryl C, 2C), 130.17(aryl C, 2C), 129.34(aryl C 2C), 128.76(aryl C, 2C), 128.35(aryl C, 2C), 128.14(aryl C), 125.99(aryl C), 125.91(aryl C), 125.51(aryl C, 2C), 124.84(aryl C, 2C), 124.57(aryl C, 2C), 124.30(aryl C), 123.53(aryl C), 121.93(aryl C), 115.88(aryl C), 114.49(aryl C), 114.28(aryl C), 61.90(sp<sup>3</sup>-C of C<sub>60</sub>), 56.83(sp<sup>3</sup>-C of C<sub>60</sub>). UV-vis (CHCl<sub>3</sub>) λ<sub>max</sub> 447, 537, 683 nm; HRMS (MALDI-TOF-MS, DCTB as matrix, negative mode): *m/z* [M]<sup>-</sup> calcd for C<sub>92</sub>H<sub>22</sub>Br<sub>2</sub>N<sub>2</sub> 1314.0152; found 1312.0146.

### Synthesis of **3fi**

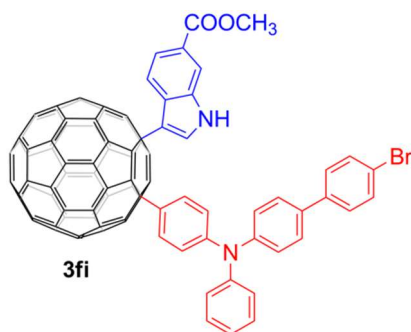

C<sub>60</sub> (36.0 mg, 0.05 mmol), methyl indole-6-carboxylate (10.2 mg, 0.06 mmol), KO<sup>t</sup>Bu (11.2 mg, 0.1 mmol) were dissolved in chlorobenzene (8 mL) at room temperature under Ar atmosphere. Then DMSO (2 mL) was added to the mixture and the color of the solution changed gradually from purple to dark green. After being stirred for 30 minutes, CF<sub>3</sub>SO<sub>3</sub>H (90 μL, 1 mmol) was added to the mixture and the color changed from dark green to brown. And after being stirred for 10 minutes, DDQ (56 mg, 0.25 mmol) and 4-bromo-4'-(diphenylamino)biphenyl (100 mg, 0.25 mmol) were added to the mixture and stirred in an oil bath at 130 °C for 60 minutes. The mixture was cooled to room temperature and then added 20 mL carbon disulfide. Resulting solution was washed with water and then evaporated in vacuo. The residue was separated on a silica gel column with carbon disulfide/dichloromethane (2:1) as the eluent to give unreacted C<sub>60</sub> (8 mg, 22%) and **3fi** (44.7 mg, 69%) as black amorphous solid. <sup>1</sup>H NMR (400 MHz, CS<sub>2</sub>/d<sub>6</sub>-acetone) δ 10.73 (s, 1H), 8.33 (d, *J* = 8.4 Hz, 1H), 8.15 (s, 1H), 7.97 (d, *J* = 7.2 Hz, 2H), 7.91 (s, 1H), 7.76 (d, *J* = 8.4 Hz, 1H), 7.51 - 7.43 (m, 6H), 7.28 (t, *J* = 7.0 Hz, 2H), 7.18 - 7.13 (m, 6H), 7.05 (t, *J* = 6.8 Hz, 1H), 3.87 (s, 3H). <sup>13</sup>C NMR (100 MHz, CS<sub>2</sub>/d<sub>6</sub>-acetone) (all 1C unless indicated) δ

166.97(acyl C), 157.21, 157.06, 151.68, 151.66, 149.17, 149.14, 149.08, 148.92, 147.82, 147.68, 147.64, 147.54(4C), 147.44(3C), 147.38, 147.33, 146.10, 146.08, 145.74(aryl C), 145.66, 145.63, 145.55, 145.33(2C), 145.29, 145.21, 144.99, 144.94(2C), 144.91(aryl C), 144.86(2C), 144.80, 144.67, 144.62, 144.57, 144.53(2C), 144.42, 143.81, 143.74(2C), 143.71, 143.69(2C), 143.30, 143.20(2C), 143.16(2C), 142.91(aryl C), 142.80, 142.60, 141.49, 139.82, 139.28, 139.24(aryl C), 138.05(aryl C), 137.93, 137.25(aryl C), 134.87(aryl C), 134.66(aryl C), 132.43(aryl C, 2C), 130.14(aryl C, 2C), 129.61(aryl C), 129.24(aryl C, 2C), 128.72(aryl C, 2C), 128.32(aryl C, 2C), 127.81(aryl C), 125.48(aryl C, 2C), 124.79(aryl C, 2C), 124.61(aryl C, 2C), 124.27(aryl C), 121.98(aryl C), 121.59(aryl C), 120.70(aryl C), 116.56(aryl C), 115.07(aryl C), 61.84(sp<sup>3</sup>-C of C<sub>60</sub>), 56.82(sp<sup>3</sup>-C of C<sub>60</sub>), 51.85(-OCH<sub>3</sub>). HRMS (MALDI-TOF-MS, DCTB as matrix, negative mode): m/z [M]<sup>-</sup> calcd for C<sub>94</sub>H<sub>25</sub>BrN<sub>2</sub>O<sub>2</sub> 1294.1092; found 1294.1084.

### Synthesis of **3aj**

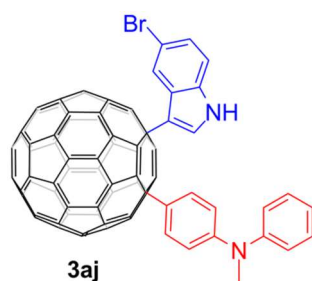

C<sub>60</sub> (36.0 mg, 0.05 mmol), 5-bromoindole (12 mg, 0.06 mmol), KO<sup>t</sup>Bu (11.2 mg, 0.1 mmol) were dissolved in chlorobenzene (8 mL) at room temperature under Ar atmosphere. Then DMSO (2 mL) was added to the mixture and the color of the solution changed gradually from purple to dark green. After being stirred for 30 minutes, CF<sub>3</sub>SO<sub>3</sub>H (90 μL, 1 mmol) was added to the mixture and the color changed from dark green to brown. And after being stirred for 10 minutes, DDQ (56 mg, 0.25 mmol) and N-methyldiphenylamine (44 μL, 0.25 mmol) were added to the mixture and stirred in an oil bath at 130 °C for 120 minutes. The mixture was cooled to room temperature and then added 20 mL carbon disulfide. Resulting solution was washed with water and then evaporated in vacuo. The residue was separated on a silica gel column with carbon disulfide/dichloromethane (10:1) as the eluent to give unreacted C<sub>60</sub> (4.9 mg, 14%) and **3aj** (23.3 mg, 43%) as black amorphous solid. <sup>1</sup>H NMR (400 MHz, CS<sub>2</sub>/d<sub>6</sub>-acetone) δ 10.20 (s, 1H), 8.38 (s, 1H), 7.87 (dd, *J* = 8.8, 3.2 Hz, 2H), 7.65 (t, *J* = 2.8 Hz, 1H), 7.34 (dd, *J* = 8.4, 2.8 Hz, 1H), 7.28 - 7.23 (m, 3H), 7.09-7.07 (m, 2H), 6.98 (dd, *J* = 8.4, 2.8 Hz, 3H), 3.38 (s, 3H). <sup>13</sup>C NMR (100 MHz, CS<sub>2</sub>/d<sub>6</sub>-acetone) (all 1C unless indicated) δ 157.23, 156.98, 151.83, 151.48, 149.08(2C), 148.97(2C), 148.84(aryl C), 148.70, 147.60, 147.55(2C), 147.45(3C), 147.32, 147.25, 146.04(2C), 145.99(aryl C), 145.61, 145.55, 145.28(2C), 145.24, 145.17, 145.14, 144.94, 144.91(2C), 144.84(2C), 144.79(2C), 144.65, 144.58, 144.51(2C), 144.46, 144.40, 143.78, 143.68(2C), 143.60(3C), 143.23, 143.12(4C), 142.89, 142.72, 142.53, 141.43, 139.26, 139.04, 137.96, 137.90, 136.39(aryl C), 132.21(aryl C), 129.93(aryl C, 2C), 128.93(aryl C, 2C), 128.03(aryl C), 126.07(aryl



C), 125.56(aryl C), 123.63(aryl C), 123.33(aryl C), 122.92(aryl C, 2C), 119.39(aryl C, 2C), 116.09(aryl C), 114.64(aryl C), 113.86(aryl C), 61.76(sp<sup>3</sup>-C of C<sub>60</sub>), 56.62(sp<sup>3</sup>-C of C<sub>60</sub>), 40.60(-CH<sub>3</sub>). HRMS (MALDI-TOF-MS, DCTB as matrix, negative mode): m/z [M]<sup>-</sup> calcd for C<sub>81</sub>H<sub>17</sub>BrN<sub>2</sub> 1098.0567; found 1098.0575.

### Synthesis of **3ak**

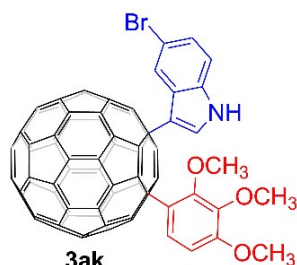

C<sub>60</sub> (36.0 mg, 0.05 mmol), 5-bromoindole (12 mg, 0.06 mmol), KO<sup>t</sup>Bu (11.2 mg, 0.1 mmol) were dissolved in 1,2-dichlorobenzene (8 mL) at room temperature under Ar atmosphere. Then DMSO (2 mL) was added to the mixture and the color of the solution changed gradually from purple to dark green. After being stirred for 30 minutes, CF<sub>3</sub>SO<sub>3</sub>H (90 μL, 1 mmol) was added to the mixture and the color changed from dark green to brown. And after being stirred for 10 minutes, DDQ (56 mg, 0.25 mmol) and 1,2,3-trimethoxybenzene (42 mg, 0.25 mmol) were added to the mixture and stirred in an oil bath at 150 °C for 60 minutes. The mixture was cooled to room temperature and then added 20 mL carbon disulfide. Resulting solution was washed with water and then evaporated in vacuo. The residue was separated on a silica gel column with carbon disulfide/dichloromethane (2:1) as the eluent to give unreacted C<sub>60</sub> (5.8 mg, 16%) and **3ak** (18.5 mg, 36%) as black amorphous solid. <sup>1</sup>H NMR (400 MHz, CS<sub>2</sub>/d<sub>6</sub>-DMSO) δ 11.33 (s, 1H), 8.32 (s, 1H), 7.68 (d, *J* = 8.8 Hz, 1H), 7.61 (s, 1H), 7.38 (d, *J* = 8.4 Hz, 1H), 7.24 (d, *J* = 8.4 Hz, 1H), 6.74 (d, *J* = 8.4 Hz, 1H), 4.10 (s, 3H), 3.92 (s, 6H). <sup>13</sup>C NMR (100 MHz, CS<sub>2</sub>/d<sub>6</sub>-DMSO) (all 1C unless indicated) δ 155.88, 155.60, 153.54(aryl C), 152.33(aryl C), 150.59, 150.09, 147.85, 147.78, 147.70, 147.28, 146.84, 146.44, 146.22(4C), 145.99, 145.93, 145.21, 144.71, 144.63(2C), 144.48, 144.36, 144.29, 144.15, 144.08(2C), 143.83, 143.70(4C), 143.50(2C), 143.35, 143.27, 143.23, 143.05(2C), 142.68, 142.54, 142.45, 142.38(2C), 142.24, 142.09, 141.98, 141.93, 141.86, 141.79(2C), 141.61, 141.57, 141.36, 140.96, 139.96, 137.86(2C), 137.73, 136.74(aryl C), 135.26(aryl C), 126.80(aryl C), 125.64(aryl C), 124.80(aryl C), 124.10(aryl C), 123.19(aryl C), 121.89(aryl C), 113.56(aryl C), 113.16(aryl C), 112.69(aryl C), 106.71(aryl C), 59.90(sp<sup>3</sup>-C of C<sub>60</sub>), 59.43(sp<sup>3</sup>-C of C<sub>60</sub>), 58.85(-OCH<sub>3</sub>), 55.40(-OCH<sub>3</sub>), 55.03(-OCH<sub>3</sub>). UV-vis (CHCl<sub>3</sub>) λ<sub>max</sub> 447, 539, 683 nm; HRMS (MALDI-TOF-MS, DCTB as matrix, negative mode): m/z [M]<sup>-</sup> calcd for C<sub>77</sub>H<sub>16</sub>BrNO<sub>3</sub> 1083.0305; found 1083.0311.

## Synthesis of 5aa

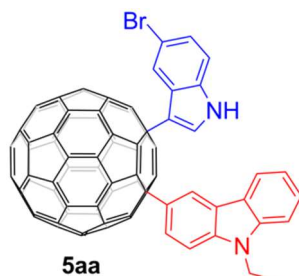

C<sub>60</sub> (36.0 mg, 0.05 mmol), 5-bromoindole (12 mg, 0.06 mmol), KO<sup>t</sup>Bu (11.2 mg, 0.1 mmol) were dissolved in chlorobenzene (8 mL) at room temperature under Ar atmosphere. Then DMSO (2 mL) was added to the mixture and the color of the solution changed gradually from purple to dark green. After being stirred for 30 minutes, CF<sub>3</sub>SO<sub>3</sub>H (90 μL, 1 mmol) was added to the mixture and the color changed from dark green to brown. And after being stirred for 10 minutes, DDQ (56 mg, 0.25 mmol) and N-ethylcarbazole (49 mg, 0.25 mmol) were added to the mixture and stirred in an oil bath at 120 °C for 120 minutes. The mixture was cooled to room temperature and then added 20 mL carbon disulfide. Resulting solution was washed with water and then evaporated in vacuo. The residue was separated on a silica gel column with carbon disulfide/dichloromethane (10:1) as the eluent to give unreacted C<sub>60</sub> (8.6 mg, 24%) and **5aa** (31.2 mg, 56%) as black amorphous solid. <sup>1</sup>H NMR (400 MHz, CS<sub>2</sub>/d<sub>6</sub>-acetone) δ 10.51 (s, 1H), 8.64 (d, *J* = 1.6 Hz, 1H), 8.48 (s, 1H), 8.18 (dd, *J* = 8.4, 2.0 Hz, 1H), 7.75 (d, *J* = 2.8 Hz, 1H), 7.69 (d, *J* = 8.0 Hz, 1H), 7.50 (d, *J* = 8.4 Hz, 1H), 7.44 - 7.39 (m, 3H), 7.31 (dd, *J* = 8.8, 1.6 Hz, 1H), 7.15 - 7.11 (m, 1H), 4.44 (q, *J* = 7.2 Hz, 2H), 1.49 (t, *J* = 7.2 Hz, 3H). <sup>13</sup>C NMR (100 MHz, CS<sub>2</sub>/d<sub>6</sub>-acetone) (all 1C unless indicated) δ 157.34, 157.16, 152.48, 151.54, 149.19, 149.13(2C), 148.89, 147.90, 147.67, 147.62, 147.59, 147.52(2C), 147.36, 147.29, 146.71, 146.09, 146.02, 145.68(2C), 145.40(3C), 145.30, 145.14, 145.00(4C), 144.91, 144.85, 144.83, 144.73, 144.68, 144.60, 144.57, 144.52, 144.49, 143.85, 143.77, 143.72, 143.65(3C), 143.28, 143.21(3C), 143.14, 142.98, 142.79, 142.61, 141.49, 140.92(aryl C), 140.07, 139.43, 139.12, 138.37, 138.13(aryl C), 136.63(aryl C), 131.78(aryl C), 128.19(aryl C), 126.71(aryl C), 126.11(aryl C), 126.01(aryl C), 125.81(aryl C), 124.27(aryl C), 123.69(aryl C), 123.42(aryl C), 121.32(aryl C), 120.69(aryl C), 119.90(aryl C), 116.14(aryl C), 114.60(aryl C), 114.16(aryl C), 109.74(aryl C), 109.20(aryl C), 62.59(sp<sup>3</sup>-C of C<sub>60</sub>), 56.83(sp<sup>3</sup>-C of C<sub>60</sub>), 38.33(-CH<sub>2</sub>), 14.65(-CH<sub>3</sub>). HRMS (MALDI-TOF-MS, DCTB as matrix, negative mode): *m/z* [M]<sup>-</sup> calcd for C<sub>82</sub>H<sub>17</sub>BrN<sub>2</sub> 1110.0557; found 1110.0554.

## Synthesis of 5ab

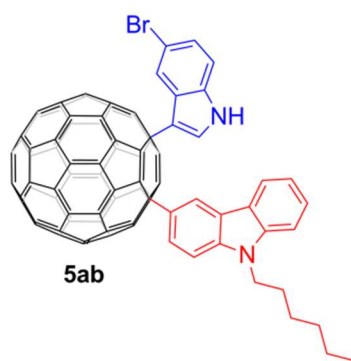

C<sub>60</sub> (36.0 mg, 0.05 mmol), 5-bromoindole (12 mg, 0.06 mmol), KO<sup>t</sup>Bu (11.2 mg, 0.1 mmol) were dissolved in chlorobenzene (8 mL) at room temperature under Ar atmosphere. Then DMSO (2 mL) was added to the mixture and the color of the solution changed gradually from purple to dark green. After being stirred for 30 minutes, CF<sub>3</sub>SO<sub>3</sub>H (90 μL, 1 mmol) was added to the mixture and the color changed from dark green to brown. And after being stirred for 10 minutes, DDQ (56 mg, 0.25 mmol) and N-hexylcarbazole (64 mg, 0.25 mmol) were added to the mixture and stirred in an oil bath at 120 °C for 60 minutes. The mixture was cooled to room temperature and then added 20 mL carbon disulfide. Resulting solution was washed with water and then evaporated in vacuo. The residue was separated on a silica gel column with carbon disulfide/dichloromethane (10:1) as the eluent to give unreacted C<sub>60</sub> (11 mg, 31%) and **5ab** (33.4 mg, 57%) as black amorphous solid. <sup>1</sup>H NMR (400 MHz, CS<sub>2</sub>/d<sub>6</sub>-acetone) 10.53 (s, 1H), 8.74 (s, 1H), 8.61 (s, 1H), 8.30 (d, J = 8.4 Hz, 1H), 7.86 (d, J = 2.4 Hz, 1H), 7.78 (d, J = 7.6 Hz, 1H), 7.61 (d, J = 8.4 Hz, 1H), 7.56 - 7.59 (m, 3H), 7.44 (d, J = 8.4 Hz, 1H), 7.25 (t, J = 7.2 Hz, 1H), 4.49 (t, J = 7.2 Hz, 2H), 1.57 - 1.42 (m, 8H), 1.06 (t, J = 6.8 Hz, 3H). <sup>13</sup>C NMR (100 MHz, CS<sub>2</sub>/d<sub>6</sub>-acetone) (all 1C unless indicated) δ 157.22, 157.09, 152.42, 151.44, 149.14, 149.11(2C), 148.81, 147.85, 147.65, 147.56(2C), 147.49(2C), 147.33, 147.26, 146.64, 146.07, 145.99, 145.66(2C), 145.35(3C), 145.27, 145.06, 144.95(4C), 144.88, 144.82, 144.79, 144.70, 144.66, 144.56(2C), 144.46(2C), 143.82, 143.73, 143.69, 143.62(3C), 143.25, 143.18(3C), 143.11, 142.96, 142.75, 142.57, 141.47, 141.29(aryl C), 140.44, 139.37, 139.08, 138.34, 138.08(aryl C), 136.51(aryl C), 131.72(aryl C), 128.11(aryl C), 126.61(aryl C), 126.05(aryl C), 125.91(aryl C), 125.73(aryl C), 124.07(aryl C), 123.70(aryl C), 123.24(aryl C), 121.20(aryl C), 120.62(aryl C), 119.83(aryl C), 116.18(aryl C), 114.66(aryl C), 113.99(aryl C), 109.80(aryl C), 109.27(aryl C), 62.51(sp<sup>3</sup>-C of C<sub>60</sub>), 56.74(sp<sup>3</sup>-C of C<sub>60</sub>), 43.72(-CH<sub>2</sub>), 32.56(-CH<sub>2</sub>), 29.92(-CH<sub>2</sub>), 27.87(-CH<sub>2</sub>), 23.68(-CH<sub>2</sub>), 14.97(-CH<sub>3</sub>). UV-vis (CHCl<sub>3</sub>) λ<sub>max</sub> 448, 540, 682 nm; HRMS (MALDI-TOF-MS, DCTB as matrix, negative mode): m/z [M]<sup>-</sup> calcd for C<sub>86</sub>H<sub>25</sub>BrN<sub>2</sub> 1166.1193; found 1166.1184.

## Synthesis of 5ac

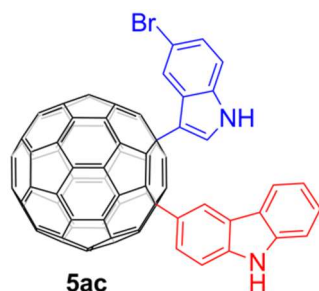

C<sub>60</sub> (36.0 mg, 0.05 mmol), 5-bromoindole (12 mg, 0.06 mmol), KO<sup>t</sup>Bu (11.2 mg, 0.1 mmol) were dissolved in chlorobenzene (8 mL) at room temperature under Ar atmosphere. Then DMSO (2 mL) was added to the mixture and the color of the solution changed gradually from purple to dark green. After being stirred for 30 minutes, CF<sub>3</sub>SO<sub>3</sub>H (90 μL, 1 mmol) was added to the mixture and the color changed from dark green to brown. And after being stirred for 10 minutes, DDQ (56 mg, 0.25 mmol) and carbazole (42 mg, 0.25 mmol) were added to the mixture and stirred at in an oil bath 110 °C for 120 minutes. The mixture was cooled to room temperature and then added 20 mL carbon disulfide. Resulting solution was washed with water and then evaporated in vacuo. The residue was separated on a silica gel column with carbon disulfide/dichloromethane (10:1) as the eluent to give unreacted C<sub>60</sub> (3.1 mg, 9%) and **5ac** (30.1 mg, 56%) as black amorphous solid. <sup>1</sup>H NMR (400 MHz, CS<sub>2</sub>/d<sub>6</sub>-acetone) δ 10.45 (s, 1H), 9.46 (d, *J* = 9.2 Hz, 1H), 8.49 (s, 1H), 8.27 (dd, *J* = 7.2, 1.6 Hz, 1H), 8.12 (d, *J* = 7.6 Hz, 1H), 8.04 (d, *J* = 7.6 Hz, 1H), 7.64-7.62 (m, 1H), 7.37 - 7.27 (m, 4H), 7.18 (t, *J* = 7.6 Hz, 1H), 7.02-6.97 (m, 1H). <sup>13</sup>C NMR (100 MHz, CS<sub>2</sub>/d<sub>6</sub>-acetone) (all 1C unless indicated) δ 157.17, 156.77, 152.00, 151.20, 149.37, 149.27, 149.11, 148.92, 147.84, 147.81, 147.70(3C), 147.53, 147.49(2C), 146.43, 146.29, 146.26, 145.85(2C), 145.46, 145.42, 145.39(aryl C), 145.21(2C), 145.14(2C), 145.06(4C), 144.93(2C), 144.80, 144.73, 144.65(2C), 144.42, 144.05, 143.92(3C), 143.83(2C), 143.49, 143.38, 143.32, 143.21(2C), 143.09, 142.94, 142.76, 141.67, 140.28, 139.46, 139.10, 138.22, 138.03, 137.91(aryl C), 136.74(aryl C), 128.09(aryl C), 126.94(aryl C), 126.86(aryl C), 126.31(aryl C), 126.24(aryl C), 126.01(aryl C), 123.37(aryl C), 123.27(aryl C), 123.16(aryl C), 121.13(aryl C), 120.80(aryl C), 120.62(aryl C), 120.52(aryl C), 115.05(aryl C), 114.52(aryl C, 2C), 111.98(aryl C), 61.10(sp<sup>3</sup>-C of C<sub>60</sub>), 57.12(sp<sup>3</sup>-C of C<sub>60</sub>). HRMS (MALDI-TOF-MS, DCTB as matrix, negative mode): *m/z* [M]<sup>-</sup> calcd for C<sub>80</sub>H<sub>13</sub>BrN<sub>2</sub> 1082.0254; found 1082.0246.

## Synthesis of 5ad

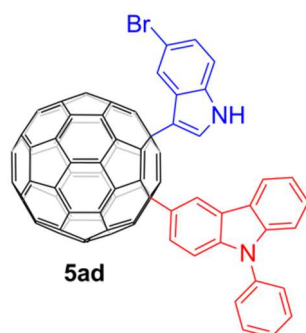

C<sub>60</sub> (36.0 mg, 0.05 mmol), 5-bromoindole (12 mg, 0.06 mmol), KO<sup>t</sup>Bu (11.2 mg, 0.1 mmol) were dissolved in chlorobenzene (8 mL) at room temperature under Ar atmosphere. Then DMSO (2 mL) was added to the mixture and the color of the solution changed gradually from purple to dark green. After being stirred for 30 minutes, CF<sub>3</sub>SO<sub>3</sub>H (90 μL, 1 mmol) was added to the mixture and the color changed from dark green to brown. And after being stirred for 10 minutes, DDQ (56 mg, 0.25 mmol) and N-phenylcarbazole (61 mg, 0.25 mmol) were added to the mixture and stirred in an oil bath at 120 °C for 120 minutes. The mixture was cooled to room temperature and then added 20 mL carbon disulfide. Resulting solution was washed with water and then evaporated in vacuo. The residue was separated on a silica gel column with carbon disulfide/dichloromethane (10:1) as the eluent to give unreacted C<sub>60</sub> (6 mg, 17%) and **5ad** (21.8 mg, 38%) as black amorphous solid. <sup>1</sup>H NMR (400 MHz, CS<sub>2</sub>/d<sub>6</sub>-acetone) δ 10.57 (s, 1H), 8.72 (s, 1H), 8.48 (s, 1H), 8.16 (dd, *J* = 8.8, 1.6 Hz, 1H), 7.80 - 7.75 (m, 2H), 7.68 - 7.59 (m, 4H), 7.52 - 7.39 (m, 5H), 7.33 - 7.30 (m, 1H), 7.23-7.19 (m, 1H). <sup>13</sup>C NMR (100 MHz, CS<sub>2</sub>/d<sub>6</sub>-acetone) (all 1C unless indicated) δ 157.26(2C), 152.41, 151.63, 149.23(4C), 148.95, 147.95, 147.75, 147.68(2C), 147.62(2C), 147.44, 147.38, 146.62, 146.17, 146.12(aryl C), 145.78(2C), 145.46(3C), 145.32, 145.06(4C), 144.99, 144.94, 144.89, 144.82, 144.75, 144.67(2C), 144.58(2C), 143.93, 143.85, 143.79, 143.74(3C), 143.36, 143.28(3C), 143.06, 142.86, 142.69, 141.81, 141.58, 140.91, 139.47, 139.23, 138.48, 138.16, 138.03(aryl C), 136.70(aryl C), 133.00(aryl C), 130.66(aryl C, 3C), 128.22(aryl C), 127.42(aryl C, 3C), 127.10(aryl C), 126.20(aryl C, 2C), 126.07(aryl C), 124.82(aryl C), 123.85(aryl C), 123.70(aryl C), 121.30(aryl C), 121.08(aryl C), 120.69(aryl C), 116.14(aryl C), 114.62(aryl C), 114.24(aryl C), 110.98(aryl C), 110.40(aryl C), 62.60(sp<sup>3</sup>-C of C<sub>60</sub>), 56.92(sp<sup>3</sup>-C of C<sub>60</sub>). UV-vis (CHCl<sub>3</sub>) λ<sub>max</sub> 448, 542, 683 nm; HRMS (MALDI-TOF-MS, DCTB as matrix, negative mode): *m/z* [M]<sup>-</sup> calcd for C<sub>86</sub>H<sub>17</sub>BrN<sub>2</sub> 1158.0567; found 1156.0578.

## Synthesis of 5ae

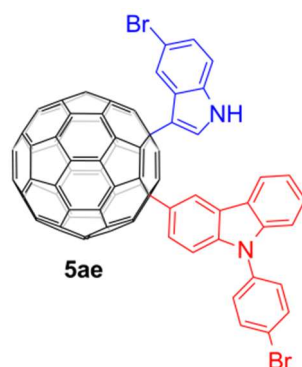

C<sub>60</sub> (36.0 mg, 0.05 mmol), 5-bromoindole (12 mg, 0.06 mmol), KO<sup>t</sup>Bu (11.2 mg, 0.1 mmol) were dissolved in chlorobenzene (8 mL) at room temperature under Ar atmosphere. Then DMSO (2 mL) was added to the mixture and the color of the solution changed gradually from purple to dark green. After being stirred for 30 minutes, CF<sub>3</sub>SO<sub>3</sub>H (90 μL, 1 mmol) was added to the mixture and the color changed from dark green to brown. And after being stirred for 10 minutes, DDQ (56 mg, 0.25 mmol) and 9-(4-bromophenyl)carbazole (81 mg, 0.25 mmol) were added to the mixture and stirred in an oil bath at 120 °C for 120 minutes. The mixture was cooled to room temperature and then added 20 mL carbon disulfide. Resulting solution was washed with water and then evaporated in vacuo. The residue was separated on a silica gel column with carbon disulfide/dichloromethane (10:1) as the eluent to give unreacted C<sub>60</sub> (5.4 mg, 15%) and **5ae** (19.5 mg, 32%) as black amorphous solid. <sup>1</sup>H NMR (400 MHz, CS<sub>2</sub>/d<sub>6</sub>-acetone) δ 10.72 (s, 1H), 8.77 (s, 1H), 8.50 (s, 1H), 8.20 (d, *J* = 8.4 Hz, 1H), 7.88 (d, *J* = 2.0 Hz, 1H), 7.82 - 7.80 (m, 3H), 7.58 (d, *J* = 8.4 Hz, 2H), 7.50 (t, *J* = 8.8 Hz, 2H), 7.42 (s, 2H), 7.33 (d, *J* = 8.8 Hz, 1H), 7.25 (t, *J* = 5.6 Hz, 1H). <sup>13</sup>C NMR (100 MHz, CS<sub>2</sub>/d<sub>6</sub>-acetone) (all 1C unless indicated) δ 157.44, 157.28, 152.46, 151.73, 149.37, 149.31(2C), 149.03, 148.03, 147.83, 147.73(2C), 147.70(2C), 147.52, 147.46, 146.69, 146.24, 146.19, 145.85, 145.81, 145.55(2C), 145.46(2C), 145.13(4C), 145.06, 145.02, 144.96(aryl C), 144.91, 144.81, 144.74(2C), 144.65(2C), 144.00, 143.92, 143.82(4C), 143.43, 143.35(4C), 143.14, 142.92, 142.76, 141.63, 140.74, 139.54, 139.32, 138.57, 138.16, 137.20, 136.84(aryl C), 133.94(aryl C, 3C), 133.40(aryl C), 129.22(aryl C, 3C), 128.28(aryl C), 127.35(aryl C), 126.42(aryl C), 126.36(aryl C), 126.07(aryl C), 125.06(aryl C), 124.03(aryl C), 123.67(aryl C), 121.87(aryl C), 121.43(aryl C, 2C), 120.84(aryl C), 116.12(aryl C), 114.55(aryl C), 114.47(aryl C), 110.99(aryl C), 110.37(aryl C), 62.66(sp<sup>3</sup>-C of C<sub>60</sub>), 57.03(sp<sup>3</sup>-C of C<sub>60</sub>). HRMS (MALDI-TOF-MS, DCTB as matrix, negative mode): *m/z* [M]<sup>-</sup> calcd for C<sub>86</sub>H<sub>16</sub>Br<sub>2</sub>N<sub>2</sub> 1235.9680; found 1235.9674.

## Synthesis of 5af

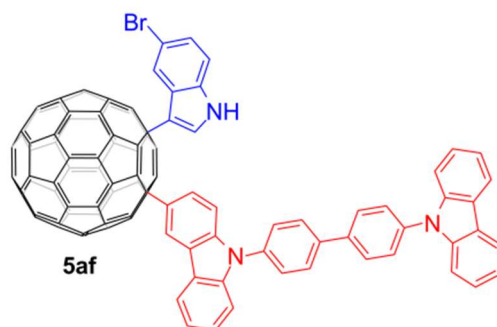

$C_{60}$  (36.0 mg, 0.05 mmol), 5-bromoindole (12 mg, 0.06 mmol), KO<sup>t</sup>Bu (11.2 mg, 0.1 mmol) were dissolved in chlorobenzene (8 mL) at room temperature under Ar atmosphere. Then DMSO (2 mL) was added to the mixture and the color of the solution changed gradually from purple to dark green. After being stirred for 30 minutes, CF<sub>3</sub>SO<sub>3</sub>H (90  $\mu$ L, 1 mmol) was added to the mixture and the color changed from dark green to brown. And after being stirred for 10 minutes, DDQ (56 mg, 0.25 mmol) and 4,4'-bis(N-carbazolyl)-1,1'-biphenyl (121 mg, 0.25 mmol) were added to the mixture and stirred in an oil bath at 130 °C for 120 minutes. The mixture was cooled to room temperature and then added 20 mL carbon disulfide. Resulting solution was washed with water and then evaporated in vacuo. The residue was separated on a silica gel column with carbon disulfide/dichloromethane (10:1) as the eluent to give unreacted  $C_{60}$  (5 mg, 14%) and **5af** (35 mg, 50%) as black amorphous solid. <sup>1</sup>H NMR (400 MHz, CS<sub>2</sub>/d<sub>6</sub>-acetone)  $\delta$  10.69 (s, 1H), 8.78 (s, 1H), 8.52 (s, 1H), 8.23 (dd,  $J$  = 8.4, 1.6 Hz, 1H), 8.11 (d,  $J$  = 8.0 Hz, 2H), 8.04 - 8.01 (m, 3H), 7.88 (d,  $J$  = 2.4 Hz, 1H), 7.83 - 7.74 (m, 5H), 7.62 (d,  $J$  = 8.4 Hz, 1H), 7.53 - 7.46 (m, 5H), 7.42 (t,  $J$  = 8.0 Hz, 3H), 7.34 (dd,  $J$  = 8.4, 1.2 Hz, 1H), 7.29 - 7.24 (m, 3H). <sup>13</sup>C NMR (100 MHz, CS<sub>2</sub>/d<sub>6</sub>-acetone) (all 1C unless indicated)  $\delta$  157.41, 157.33, 152.49, 151.72, 149.36, 149.30, 149.28, 149.04, 148.03, 147.83, 147.74, 147.70(2C), 147.51, 147.45, 146.71, 146.24, 146.18, 145.85, 145.81, 145.55(3C), 145.45, 145.41, 145.13(3C), 145.06, 145.01, 144.96, 144.90, 144.82, 144.73(2C), 144.65, 143.99, 143.92, 143.86, 143.81(3C), 143.43, 143.35(3C), 143.29, 143.13, 142.93, 142.75, 141.80, 141.64, 141.19(aryl C, 2C), 140.90(aryl C), 139.97 139.59, 139.55, 139.30, 138.55, 138.17, 137.91(aryl C), 137.56(aryl C), 136.80(aryl C), 133.21(aryl C), 129.33(aryl C, 2C), 129.24(aryl C, 2C), 128.27(aryl C), 127.98(aryl C, 3C), 127.90(aryl C, 2C), 127.26(aryl C), 126.80(aryl C, 3C), 126.32(aryl C, 2C), 126.07(aryl C), 125.01(aryl C), 124.18(aryl C, 2C), 124.01(aryl C), 123.68(aryl C), 121.43(aryl C), 121.28(aryl C), 121.08(aryl C, 2C), 121.00(aryl C, 3C), 120.81(aryl C), 116.13(aryl C), 114.51(aryl C), 114.40(aryl C), 111.17(aryl C), 110.56(aryl C), 110.38(aryl C, 2C), 62.69(sp<sup>3</sup>-C of C<sub>60</sub>), 57.02(sp<sup>3</sup>-C of C<sub>60</sub>). UV-vis (CHCl<sub>3</sub>)  $\lambda_{max}$  448, 542, 683 nm; HRMS (MALDI-TOF-MS, DCTB as matrix, negative mode):  $m/z$  [M]<sup>-</sup> calcd for C<sub>104</sub>H<sub>28</sub>BrN<sub>3</sub> 1399.1460; found 1399.1451.

## Synthesis of 5ag

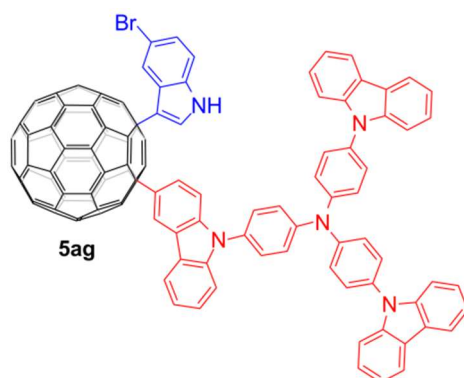

C<sub>60</sub> (36.0 mg, 0.05 mmol), 5-bromoindole (12 mg, 0.06 mmol), KO<sup>t</sup>Bu (11.2 mg, 0.1 mmol) were dissolved in chlorobenzene (8 mL) at room temperature under Ar atmosphere. Then DMSO (2 mL) was added to the mixture and the color of the solution changed gradually from purple to dark green. After being stirred for 30 minutes, CF<sub>3</sub>SO<sub>3</sub>H (90 μL, 1 mmol) was added to the mixture and the color changed from dark green to brown. And after being stirred for 10 minutes, DDQ (56 mg, 0.25 mmol) and tris(4-carbazoyl-9-ylphenyl)amine (186 mg, 0.25 mmol) were added to the mixture and stirred in an oil bath at 120 °C for 120 minutes. The mixture was cooled to room temperature and then added 20 mL carbon disulfide. Resulting solution was washed with water and then evaporated in vacuo. The residue was separated on a silica gel column with carbon disulfide/dichloromethane (10:1) as the eluent to give unreacted C<sub>60</sub> (5.5 mg, 15%) and **5ag** (36.3 mg, 44%) as black amorphous solid. <sup>1</sup>H NMR (400 MHz, CS<sub>2</sub>/d<sub>6</sub>-acetone) δ 10.38 (s, 1H), 8.70 (s, 1H), 8.47 (s, 1H), 8.19 - 8.16 (m, 1H), 8.08 - 8.05 (m, 4H), 7.74 (d, *J* = 2.8 Hz, 2H), 7.61 - 7.56 (m, 13H), 7.47-7.44 (m, 5H), 7.41 - 7.37 (m, 5H), 7.31 - 7.29 (m, 2H), 7.23 (td, *J* = 7.2, 2.8 Hz, 5H). <sup>13</sup>C NMR (100 MHz, CS<sub>2</sub>/d<sub>6</sub>-acetone) (all 1C unless indicated) δ 157.05(2C), 152.22, 151.42, 149.07(3C), 148.76, 147.77, 147.59, 147.45(4C), 147.28, 147.22, 146.78, 146.42(4C), 146.00(2C), 145.63(2C), 145.29(4C), 144.87(5C), 144.63(2C), 144.49(4C), 143.75(aryl C), 143.66(2C), 143.58(2C), 143.18(aryl C), 143.10(3C), 142.91, 142.71, 142.52, 141.74, 141.44, 141.14(aryl C, 4C), 140.83, 139.31, 139.09, 138.34, 137.98, 136.54, 133.48(aryl C), 133.01(aryl C), 132.91(aryl C), 128.55(aryl C, 5C), 128.42(aryl C, 2C), 128.11(aryl C), 127.04(aryl C), 126.62(aryl C, 5C), 126.13(aryl C), 126.08(aryl C), 125.95(aryl C, 5C), 125.66(aryl C, 2C), 124.76(aryl C), 123.95(aryl C, 6C), 123.80(aryl C), 123.71(aryl C), 121.31(aryl C), 120.99(aryl C, 5C), 120.84(aryl C, 5C), 116.19(aryl C), 114.68(aryl C), 114.06(aryl C), 110.97(aryl C), 110.37(aryl C), 110.21(aryl C, 5C), 62.44(sp<sup>3</sup>-C of C<sub>60</sub>), 56.74(sp<sup>3</sup>-C of C<sub>60</sub>). UV-vis (CHCl<sub>3</sub>) λ<sub>max</sub> 448, 539, 682 nm; HRMS (MALDI-TOF-MS, DCTB as matrix, negative mode): *m/z* [M]<sup>-</sup> calcd for C<sub>122</sub>H<sub>40</sub>BrN<sub>5</sub> 1655.2461; found 1653.2453.



## Synthesis of 5fg

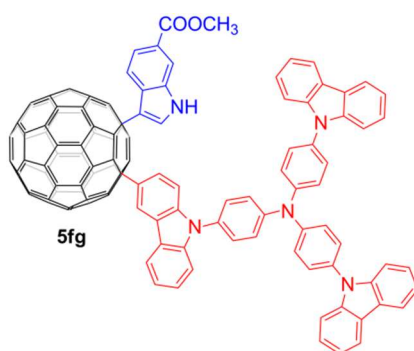

C<sub>60</sub> (36.0 mg, 0.05 mmol), methyl indole-6-carboxylate (10.2 mg, 0.06 mmol), KO<sup>t</sup>Bu (11.2 mg, 0.1 mmol) were dissolved in chlorobenzene (8 mL) at room temperature under Ar atmosphere. Then DMSO (2 mL) was added to the mixture and the color of the solution changed gradually from purple to dark green. After being stirred for 30 minutes, CF<sub>3</sub>SO<sub>3</sub>H (90 μL, 1 mmol) was added to the mixture and the color changed from dark green to brown. And after being stirred for 10 minutes, DDQ (56 mg, 0.25 mmol) and tris(4-carbazoyl-9-ylphenyl)amine (186 mg, 0.25 mmol) were added to the mixture and stirred in an oil bath at 120 °C for 120 minutes. The mixture was cooled to room temperature and then added 20 mL carbon disulfide. Resulting solution was washed with water and then evaporated in vacuo. The residue was separated on a silica gel column with carbon disulfide/dichloromethane (1:1) as the eluent to give unreacted C<sub>60</sub> (5.8 mg, 16%) and **5fg** (27.5 mg, 35%) as black amorphous solid. <sup>1</sup>H NMR (400 MHz, CS<sub>2</sub>/d<sub>6</sub>-acetone) δ 10.67 (s, 1H), 8.68 (s, 1H), 8.44 (d, J = 8.4 Hz, 1H), 8.20 (s, 1H), 8.16 (d, J = 8.4 Hz, 1H), 8.05 (d, J = 7.6 Hz, 4H), 7.91 (s, 1H), 7.80 (d, J = 8.4 Hz, 1H), 7.65 - 7.55 (m, 14H), 7.45 (d, J = 8.4 Hz, 5H), 7.40-7.36 (m, 5H), 7.25 - 7.17 (m, 5H), 3.86 (s, 3H). <sup>13</sup>C NMR (100 MHz, CS<sub>2</sub>/d<sub>6</sub>-acetone) (all 1C unless indicated) δ 166.98(acyl C), 157.23, 157.03, 152.33, 151.49, 149.26, 149.16, 148.82, 147.90, 147.69, 147.61(2C), 147.54, 147.36(3C), 146.83, 146.52, 146.47(2C), 146.10(2C), 145.73, 145.67, 145.37(4C), 145.22, 144.97(5C), 144.87, 144.81, 144.71(2C), 144.48(3C), 143.67(5C), 143.30(aryl C), 143.19(3C), 142.95(aryl C), 142.79, 142.60, 141.76, 141.52, 141.17(aryl C, 4C), 140.83, 139.41, 139.21, 138.47, 138.07, 137.30, 133.52(aryl C), 132.99(aryl C), 132.91(aryl C), 129.67(aryl C), 128.60(aryl C, 5C), 128.47(aryl C, 2C), 127.91(aryl C), 127.09(aryl C), 126.63(aryl C, 5C), 125.99(aryl C, 5C), 125.66(aryl C, 2C), 124.89(aryl C), 124.77(aryl C), 123.96(aryl C, 5C), 123.73(aryl C), 121.77(aryl C), 121.29(aryl C), 121.11(aryl C), 120.99(aryl C, 5C), 120.85(aryl C, 5C), 120.72(aryl C), 116.78(aryl C), 115.10(aryl C), 110.96(aryl C), 110.38(aryl C), 110.22(aryl C, 5C), 62.51(sp<sup>3</sup>-C of C<sub>60</sub>), 56.85(sp<sup>3</sup>-C of C<sub>60</sub>), 51.86(-OCH<sub>3</sub>). UV-vis (CHCl<sub>3</sub>) λ<sub>max</sub> 448, 540, 682 nm; HRMS (MALDI-TOF-MS, DCTB as matrix, negative mode): m/z [M]<sup>-</sup> calcd for C<sub>124</sub>H<sub>43</sub>O<sub>2</sub>N<sub>5</sub> 1634.3455; found 1634.3463.

## 2. Experimental Procedure, Spectral Data, MALDI-TOF-MS spectrum and expanded $^{13}\text{C}$ NMR (100 MHz) of **6**

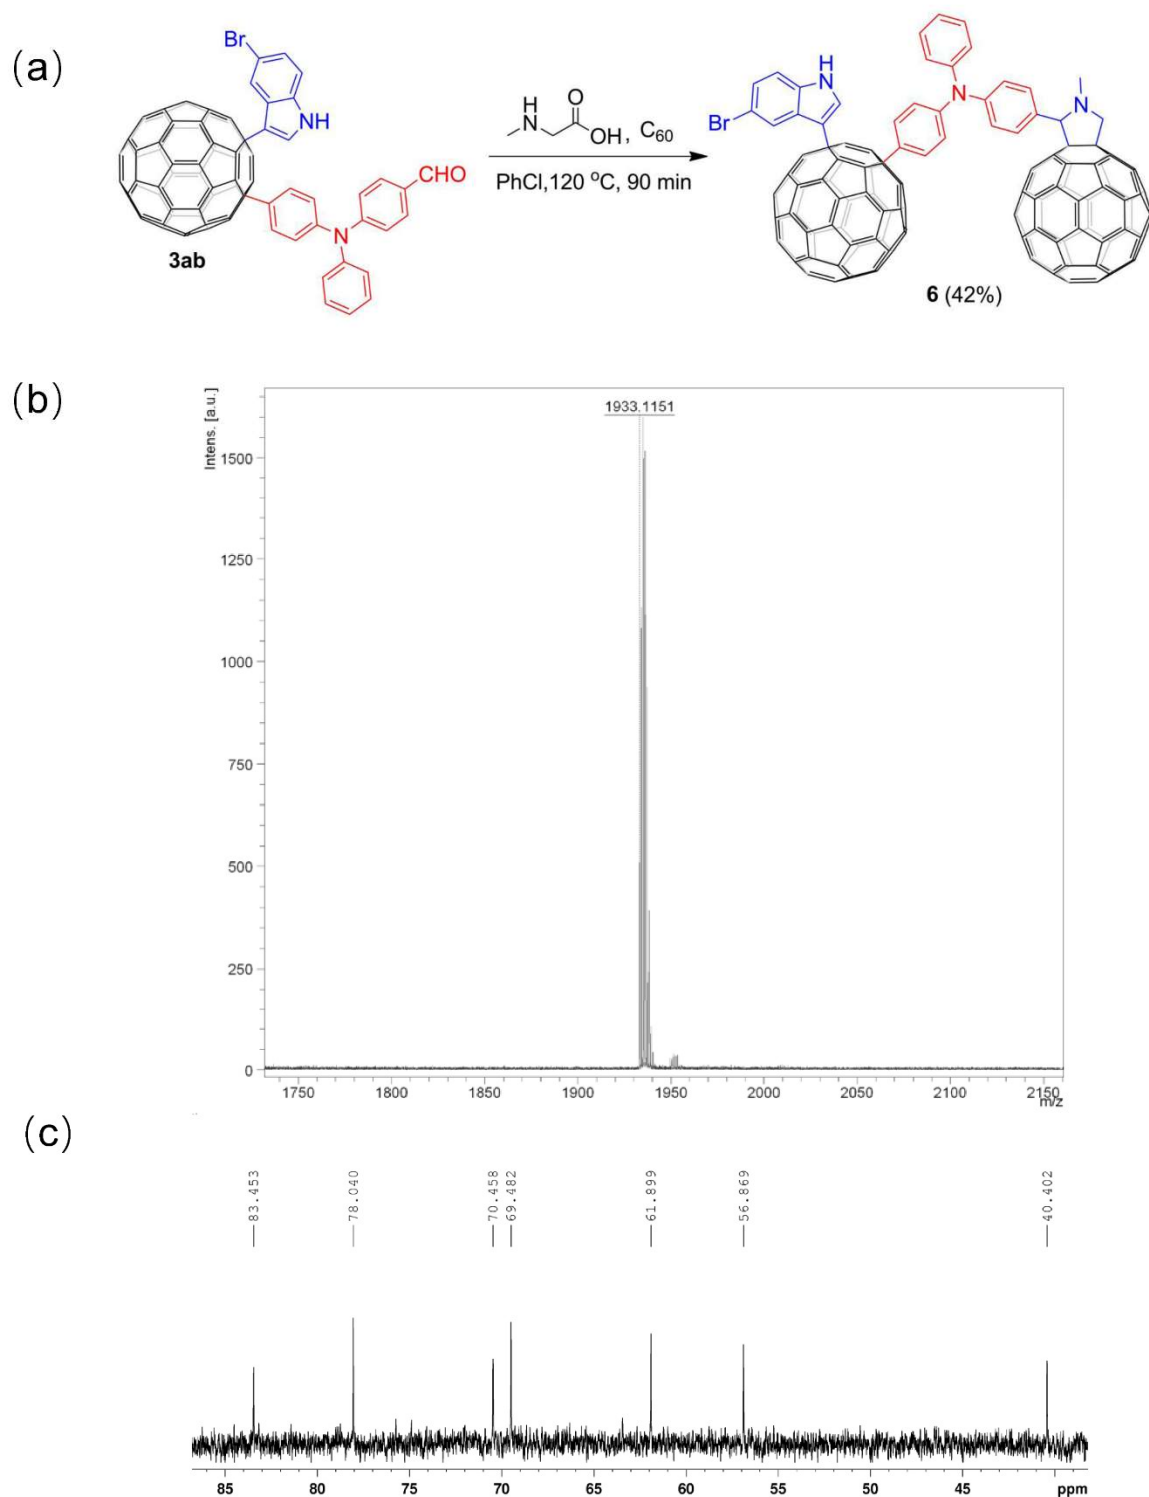

**Figure S1** (a) Synthesis of dimer **6**. (b) The MALDI-TOF-MS spectrum of **6**:  $m/z$  [**6**] $^-$  calcd for  $\text{C}_{149}\text{H}_{24}\text{BrN}_3$  1933.1154; found 1933.1151. (c) Expanded  $^{13}\text{C}$  NMR (100 MHz) of **6**.

**3ab** (12 mg, 0.01 mmol), sarcosine (3 mg, 0.03 mmol), C<sub>60</sub> (22 mg, 0.03 mmol) were dissolved in chlorobenzene (8 mL) at room temperature under Ar atmosphere. Then the mixture were stirred in an oil bath at 120 °C for 90 minutes. The mixture was cooled to room temperature and then added 20 mL carbon disulfide. Resulting solution was washed with water and then evaporated in vacuo. The residue was separated on a silica gel column with carbon disulfide/dichloromethane (5:1) as the eluent to give **6** (8 mg, 42%) as black amorphous solid. <sup>1</sup>H NMR (400 MHz, CS<sub>2</sub>/d<sub>6</sub>-acetone) δ 10.54 (s, 1H), 8.41 (s, 1H), 7.92 (d, J = 8.4 Hz, 2H), 7.74 (d, J = 2.4 Hz, 3H), 7.38 (d, J = 8.8 Hz, 1H), 7.28 - 7.22 (m, 3H), 7.17 (d, J = 8.4 Hz, 2H), 7.08 - 7.00 (m, 5H), 5.01 (d, J = 9.4 Hz, 1H), 4.98 (s, 1H), 4.33 (d, J = 9.2 Hz, 1H), 3.27 (s, 3H). <sup>13</sup>C NMR (100 MHz, CS<sub>2</sub>/d<sub>6</sub>-acetone) δ 157.23, 157.14, 156.99, 154.54(aryl C), 154.15, 153.99, 151.77, 151.67, 149.26, 149.23, 149.09, 149.00, 148.08(2C), 147.87(2C), 147.80(2C), 147.76, 147.71, 147.64(4C), 147.52, 147.48, 147.42, 147.35, 147.07, 146.89, 146.81(2C), 146.74(2C), 146.62(2C), 146.46(2C), 146.29, 146.19(aryl C), 146.15(2C), 146.05(2C), 145.88(2C), 145.82(2C), 145.76, 145.73(2C), 145.66(2C), 145.51, 145.43(2C), 145.39, 145.32, 145.26, 145.19, 145.10, 145.05(2C), 144.94(4C), 144.90(2C), 144.82, 144.70, 144.65(2C), 144.49, 143.93, 143.79(3C), 143.76(2C), 143.71, 143.56, 143.38, 143.25(4C), 143.17, 143.13(2C), 143.04(aryl C), 142.85, 142.82(2C), 142.72, 142.69(2C), 142.65(2C), 142.58, 142.54(2C), 142.30, 142.22, 142.17(aryl C), 141.58, 140.75, 140.69, 140.50, 139.75, 139.35, 139.26(2C), 138.12, 138.03, 137.35, 137.12, 136.64, 136.52(2C), 136.37(aryl C), 134.92(aryl C), 132.27(aryl C), 130.13(aryl C, 3C), 129.24(aryl C, 2C), 128.16(aryl C), 126.03(aryl C, 2C), 125.92(aryl C), 125.15(aryl C, 3C), 124.58(aryl C, 2C), 124.12(aryl C), 123.59(aryl C), 115.88(aryl C), 114.55(aryl C), 114.25(aryl C), 83.45, 78.04, 70.46, 69.48, 61.90(sp<sup>3</sup>-C of C<sub>60</sub>), 56.87(sp<sup>3</sup>-C of C<sub>60</sub>), 40.40(-CH<sub>3</sub>). HRMS (MALDI-TOF-MS, DCTB as matrix, negative mode): m/z [M]<sup>-</sup> calcd for C<sub>149</sub>H<sub>24</sub>BrN<sub>3</sub> 1933.1154; found 1933.1151.

### 3. NMR Spectra of 3aa-3ak, 5aa-5fg and 6

#### <sup>1</sup>H NMR (400 MHz, CS<sub>2</sub>/d<sub>6</sub>-acetone) of compound 3aa

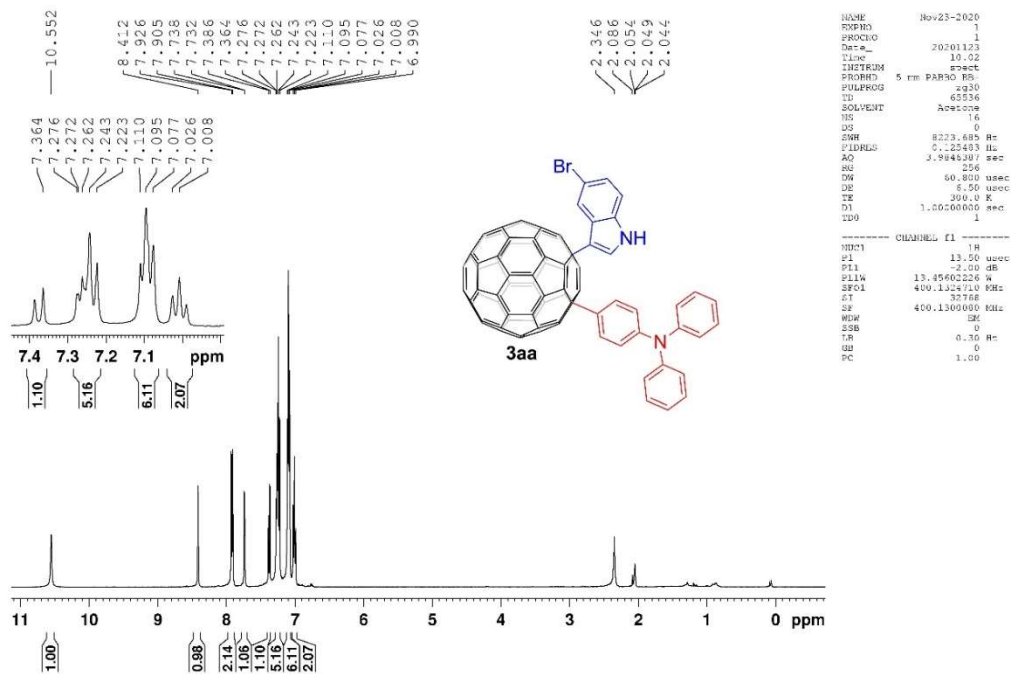

#### <sup>13</sup>C NMR (100 MHz, CS<sub>2</sub>/d<sub>6</sub>-acetone) of compound 3aa

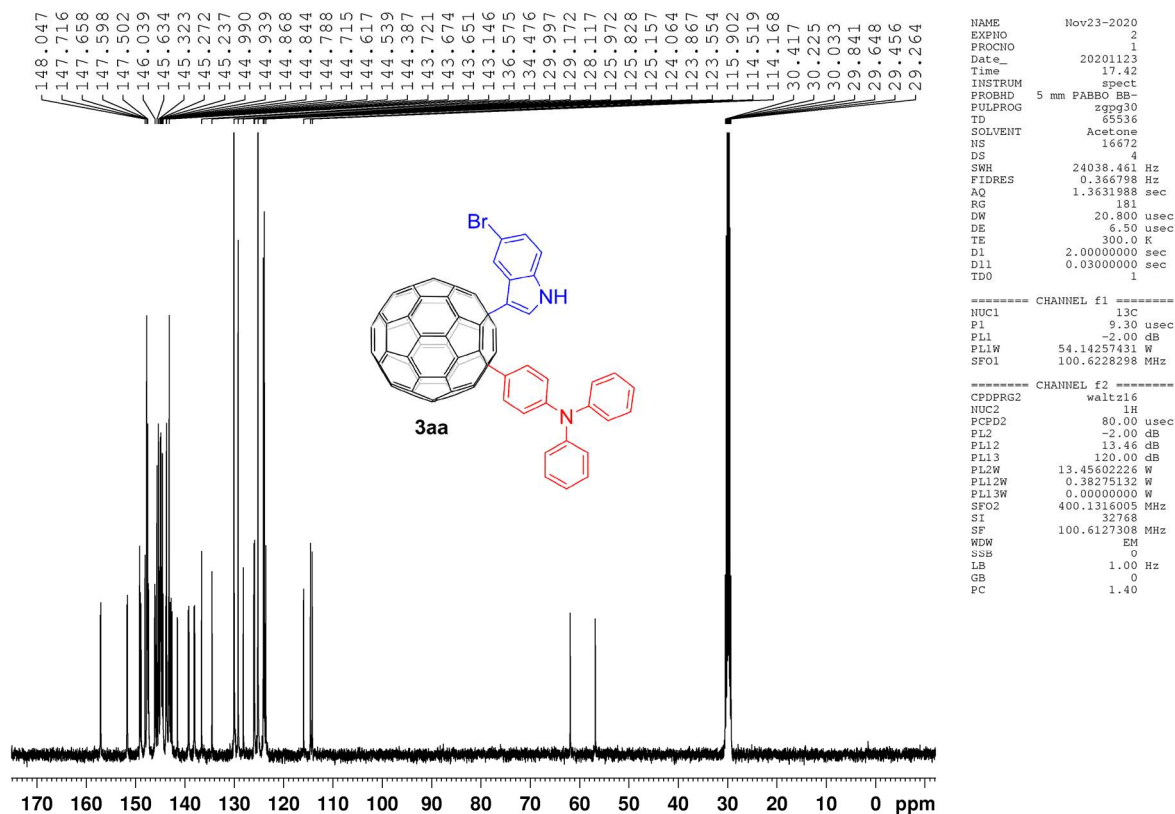

Expanded  $^{13}\text{C}$  NMR (100 MHz,  $\text{CS}_2/\text{d}_6\text{-acetone}$ ) of compound 3aa

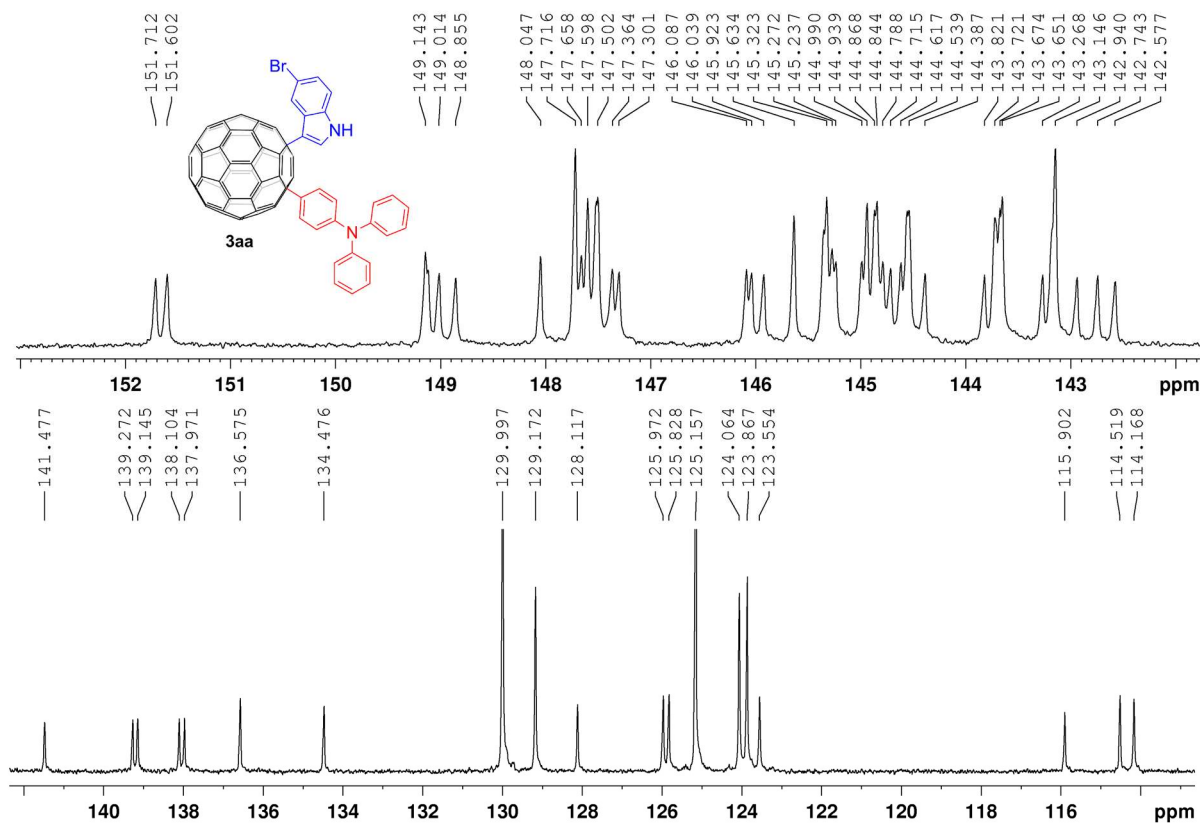

$^1\text{H}$  NMR (400 MHz,  $\text{CS}_2/\text{d}_6\text{-acetone}$ ) of compound 3ba

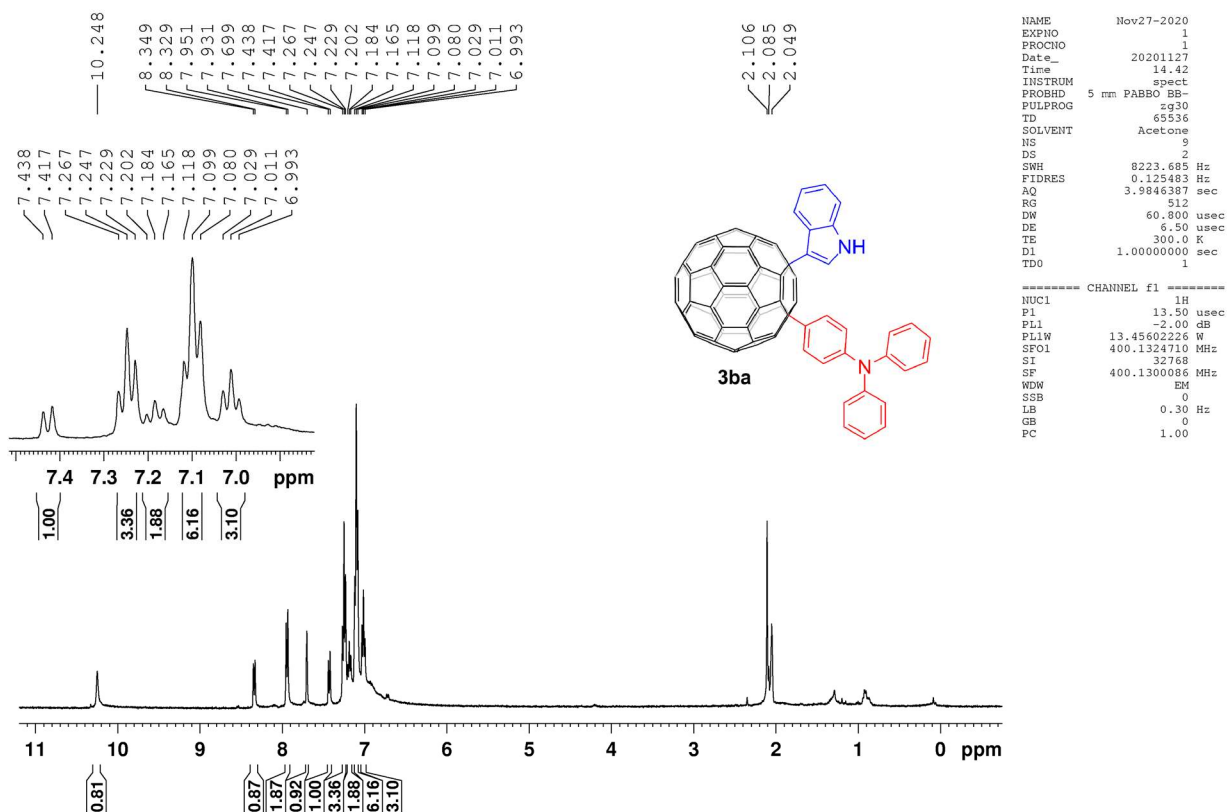

### <sup>13</sup>C NMR (100 MHz, CS<sub>2</sub>/d<sub>6</sub>-acetone) of compound 3ba

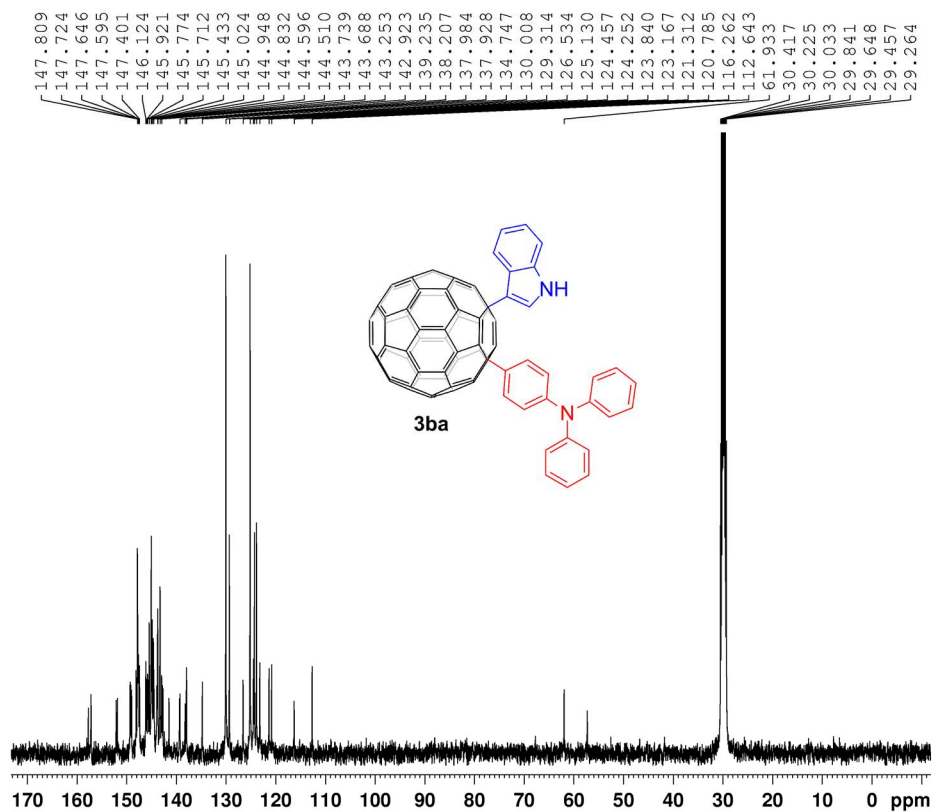

```

NAME      Nov27-2020
EXPNO    2
PROCNO   1
Date_    20201127
Time     17.25
INSTRUM  spect
PROBHD   5 mm PABBO BB-
PULPROG  zgpg30
TD        65536
SOLVENT  Acetone
NS        20480
DS        4
SWH       24038.461 Hz
FIDRES    0.366798 Hz
AQ        1.363198 sec
RG        80.6
DW        20.800 usec
DE        6.50 usec
TE        300.0 K
D1        2.0000000 sec
D11       0.0300000 sec
TD0       1
    
```

```

===== CHANNEL f1 =====
NUC1      13C
P1        9.30 usec
PL1       -2.00 dB
PL12      54.14257431 W
SFO1      100.6228298 MHz

===== CHANNEL f2 =====
CPDPRG2   waltz16
NUC2      1H
PCPD2     80.00 usec
PL2       -2.00 dB
PL12      13.46 dB
PL13      120.00 dB
PL2W      13.45602226 W
PL12W     0.38276132 W
PL13W     0.00000000 W
SFO2      400.1316005 MHz
SI        32768
SF        100.6127271 MHz
WDW       EM
SSB       0
LB        2.00 Hz
GB        0
PC        1.40
    
```

### Expanded <sup>13</sup>C NMR (100 MHz, CS<sub>2</sub>/d<sub>6</sub>-acetone) of compound 3ba

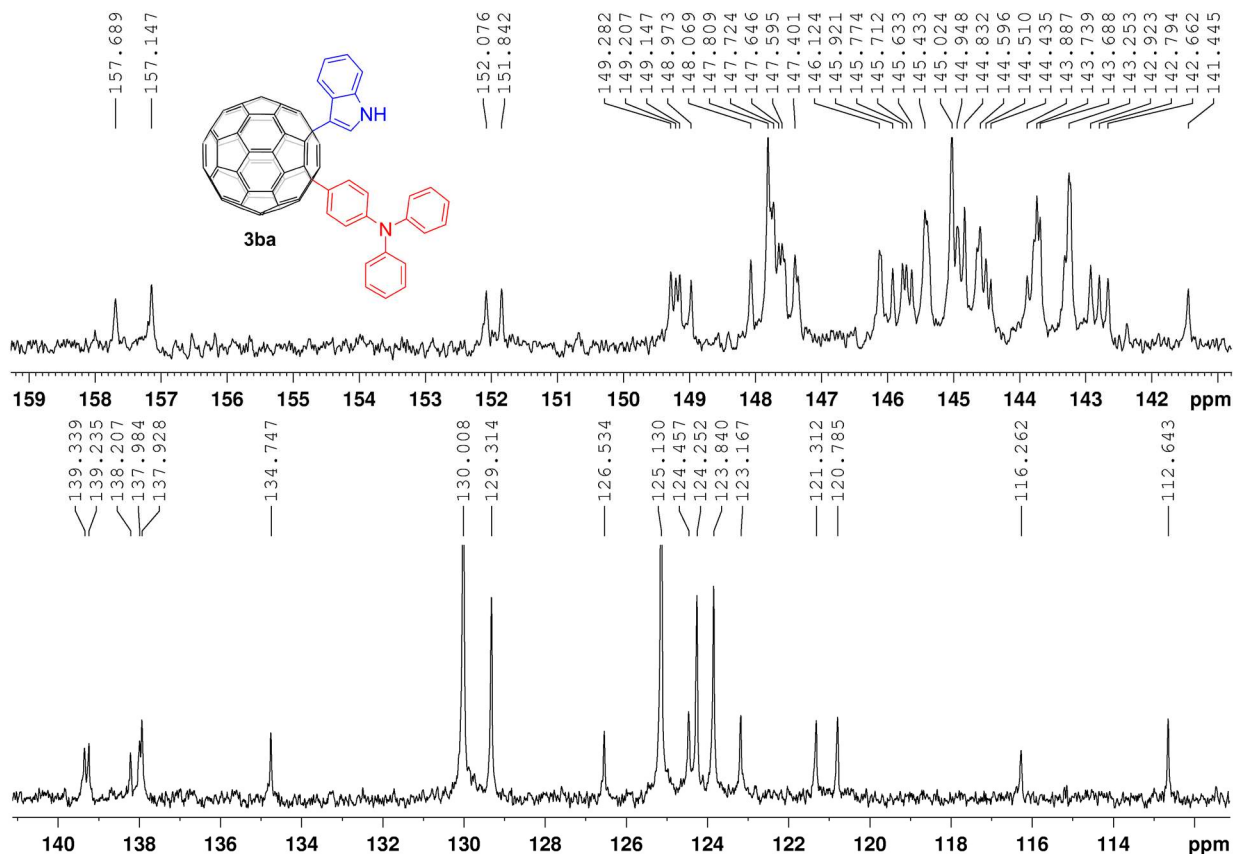

### <sup>1</sup>H NMR (400 MHz, CS<sub>2</sub>/d<sub>6</sub>-acetone) of compound 3ca

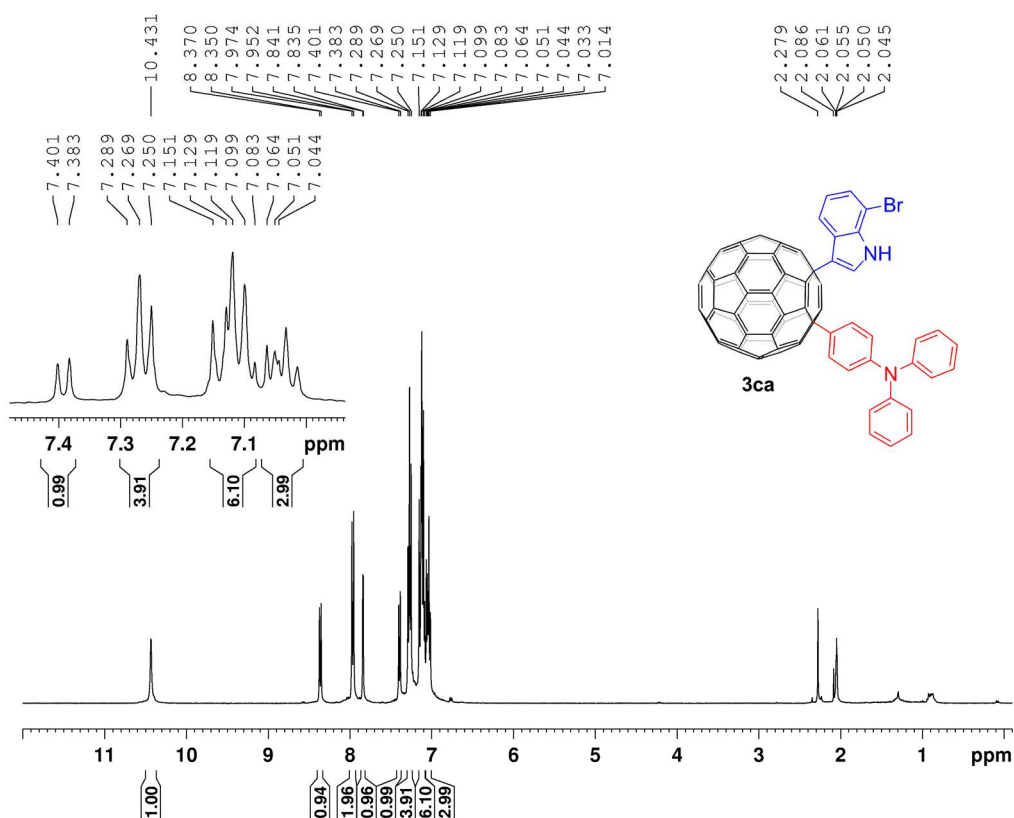

```

NAME      Dec03-2020
EXPNO    1
PROCNO   1
Date_    20201203
Time     10.26
INSTRUM  spect
PROBHD   5 mm PABBO BB-
PULPROG  zg30
TD        65536
SOLVENT  Acetone
NS        16
DS        2
SWH       8223.685 Hz
FIDRES    0.125483 Hz
AQ         3.9846387 sec
RG         362
DW         60.800 usec
DE         6.50 usec
TE         300.0 K
D1         1.00000000 sec
TDO        1
  
```

```

===== CHANNEL f1 =====
NUC1      1H
P1        13.50 usec
PL1       -2.00 dB
PL1W      13.45602226 W
SFO1      400.1324710 MHz
SI         32768
SF         400.1300075 MHz
EM         EM
SSB        0
LB         0.30 Hz
GB         0
PC         1.00
  
```

### <sup>13</sup>C NMR (100 MHz, CS<sub>2</sub>/d<sub>6</sub>-acetone) of compound 3ca

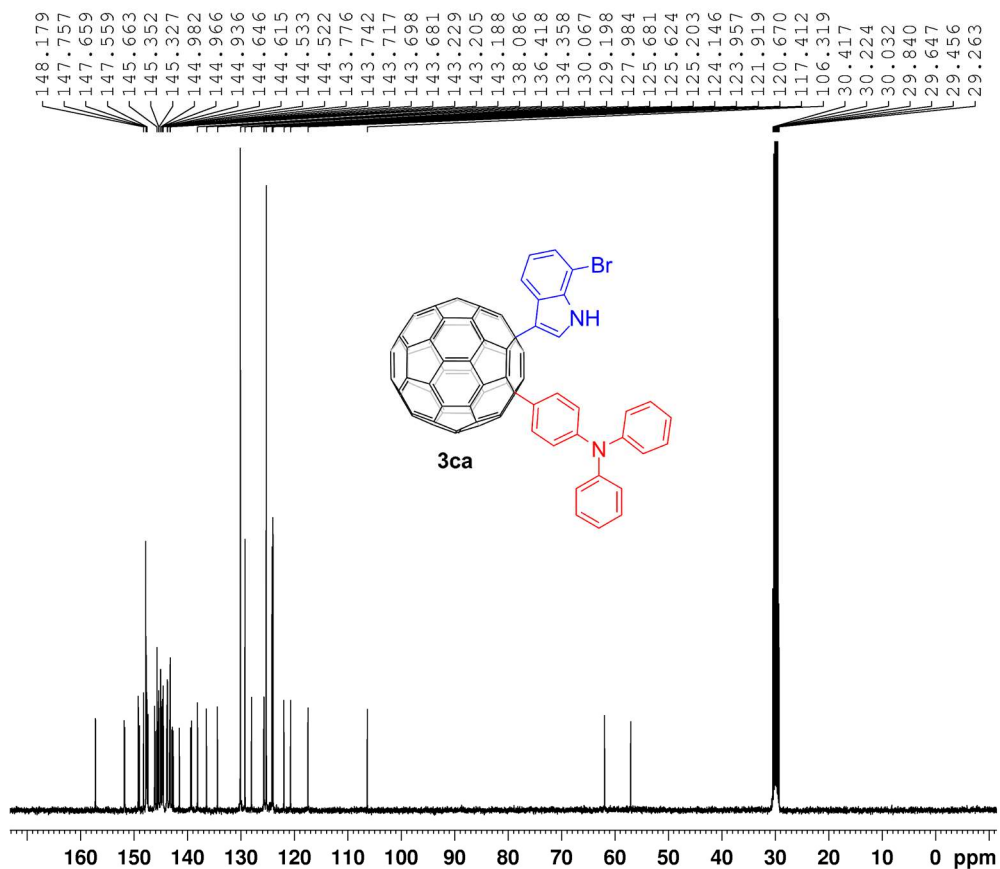

```

NAME      Dec03-2020
EXPNO    5
PROCNO   1
Date_    20201204
Time     8.35
INSTRUM  spect
PROBHD   5 mm PABBO BB-
PULPROG  zgpg30
TD        65536
SOLVENT  Acetone
NS        15769
DS        4
SWH       24038.461 Hz
FIDRES    0.366798 Hz
AQ         1.3631988 sec
RG         80.6
DW         20.800 usec
DE         6.50 usec
TE         300.0 K
D1         2.00000000 sec
D11        0.03000000 sec
TDO        1
  
```

```

===== CHANNEL f1 =====
NUC1      13C
P1         9.30 usec
PL1       -2.00 dB
PL1W      54.14257431 W
SFO1      100.6228298 MHz
  
```

```

===== CHANNEL f2 =====
CPDPRG2   waltz16
NUC2      1H
PCPD2     80.00 usec
PL2       -2.00 dB
PL12      13.46 dB
PL13      120.00 dB
PL2W      13.45602226 W
PL12W     0.38275132 W
PL13W     0.00000000 W
SFO2      400.1316005 MHz
SI         32768
SF         100.6127271 MHz
EM         EM
SSB        0
LB         1.00 Hz
GB         0
PC         1.40
  
```

### Expanded <sup>13</sup>C NMR (100 MHz, CS<sub>2</sub>/d<sub>6</sub>-acetone) of compound 3ca

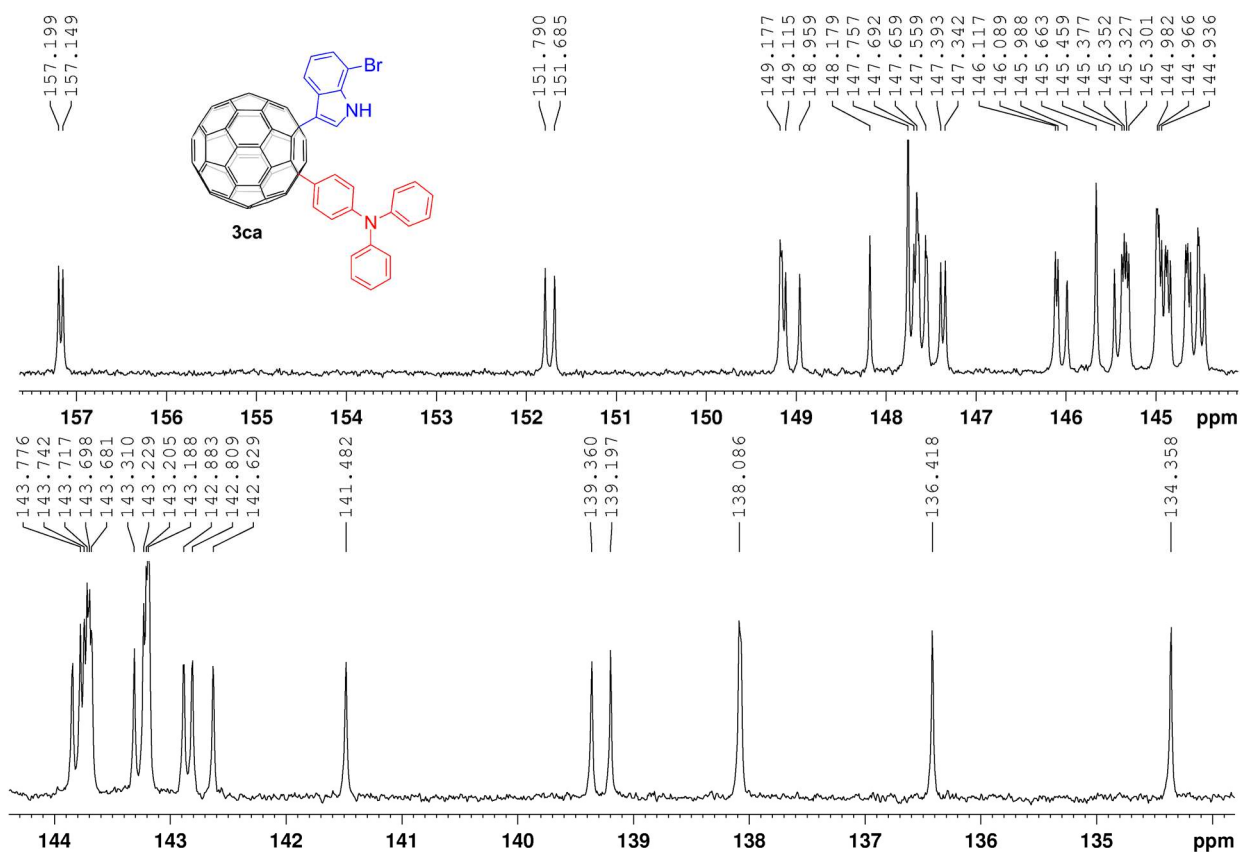

### <sup>1</sup>H NMR (400 MHz, CS<sub>2</sub>/d<sub>6</sub>-acetone) of compound 3da

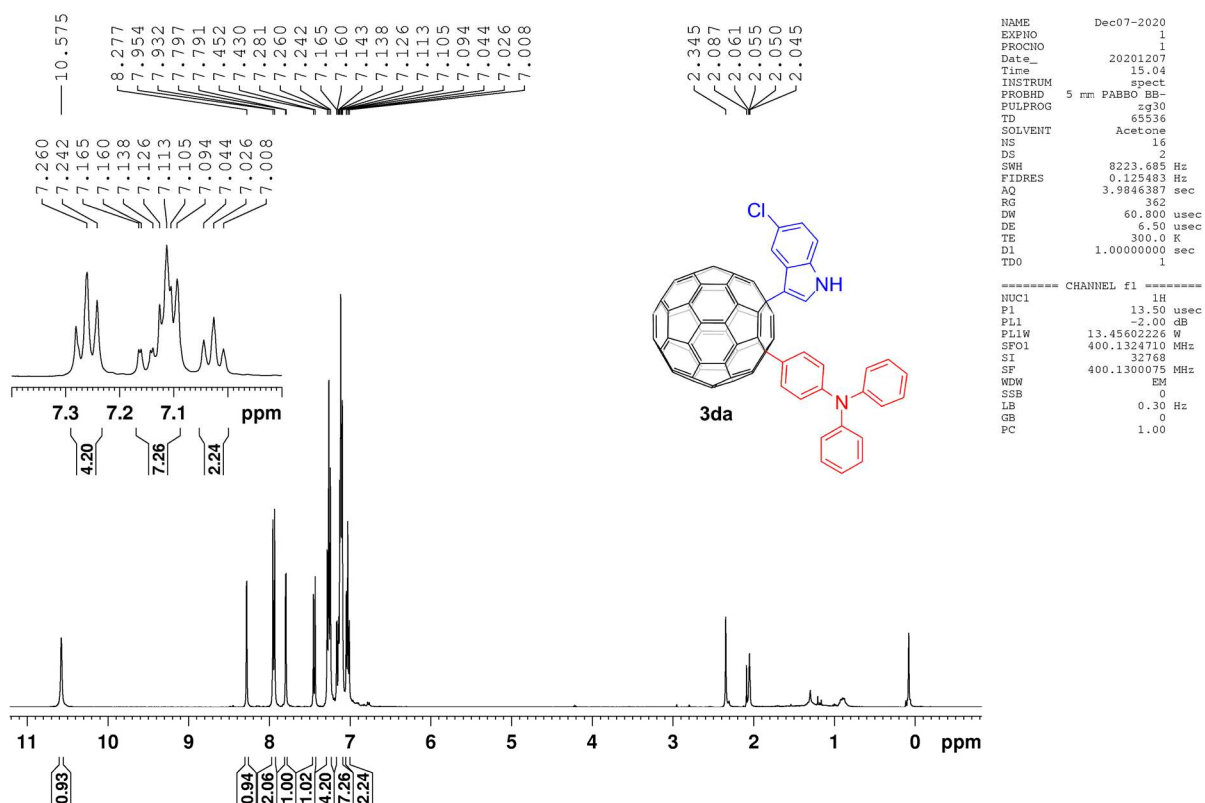



### <sup>13</sup>C NMR (100 MHz, CS<sub>2</sub>/d<sub>6</sub>-acetone) of compound 3da

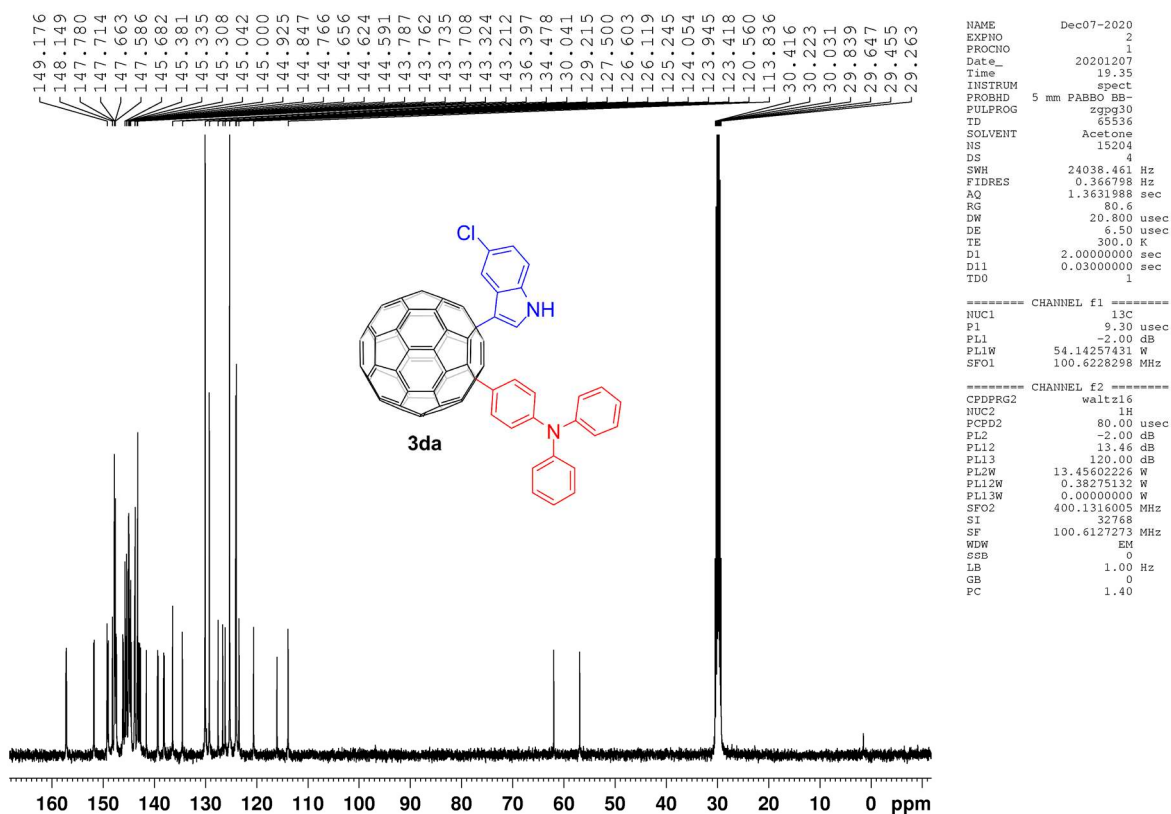

### Expanded <sup>13</sup>C NMR (100 MHz, CS<sub>2</sub>/d<sub>6</sub>-acetone) of compound 3da

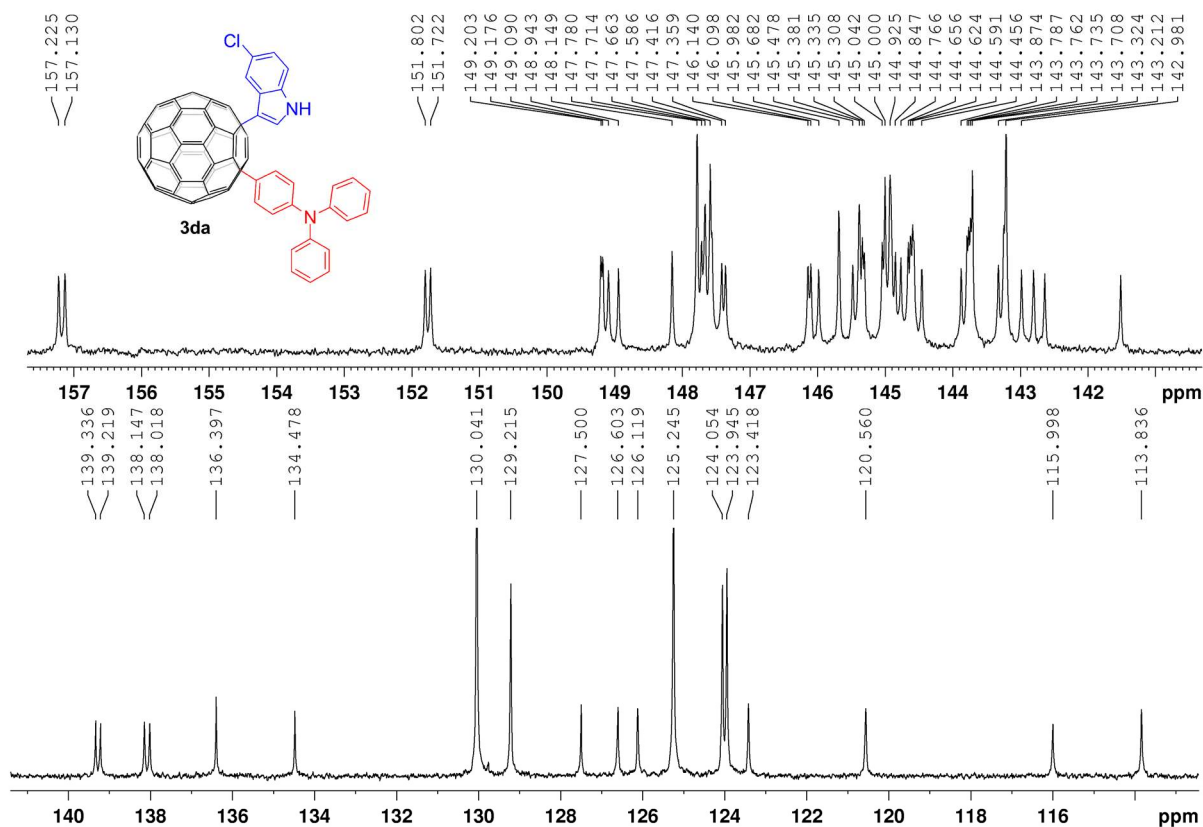

### <sup>1</sup>H NMR (400 MHz, CS<sub>2</sub>/d<sub>6</sub>-acetone) of compound 3ea

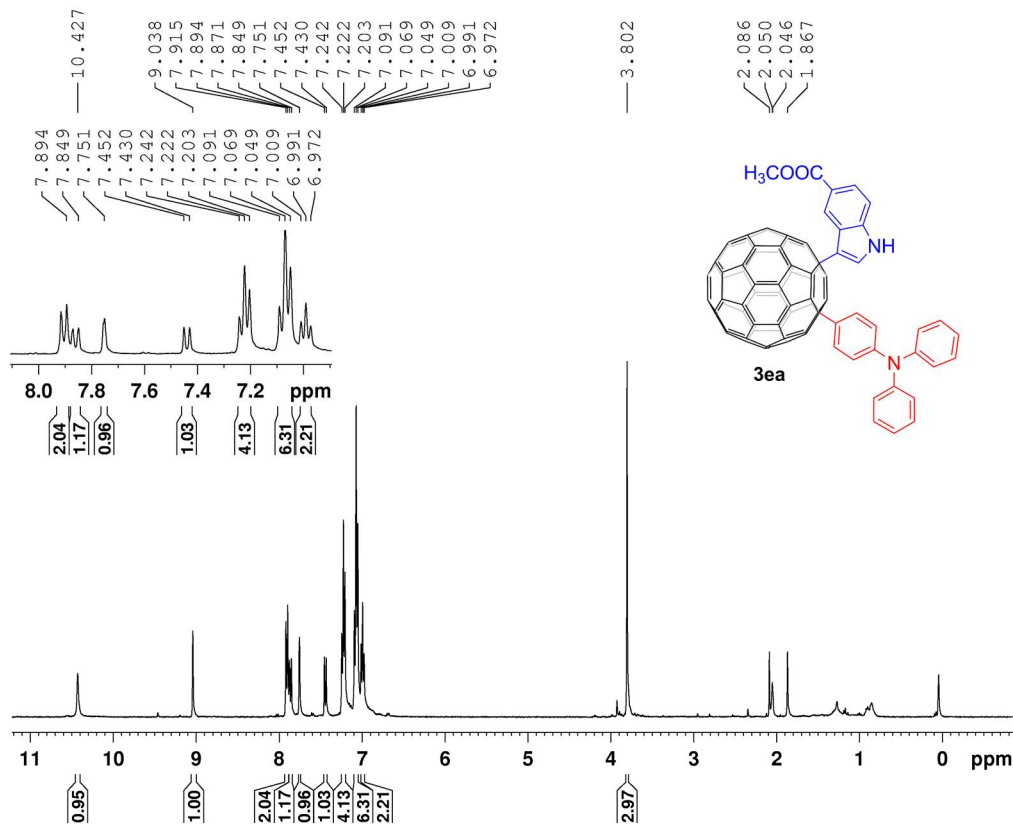

```

NAME      Dec04-2020
EXPNO    1
PROCNO    1
Date_     20201204
Time      14.33
INSTRUM   spect
PROBHD    5 mm PABBO BB-
PULPROG   zg30
TD         65536
SOLVENT   Acetone
NS         16
DS         2
SWH        8223.685 Hz
FIDRES     0.125483 Hz
AQ         3.9846387 sec
RG         362
DW         60.800 usec
DE         6.50 usec
TE         300.0 K
D1         1.00000000 sec
TD0        1

----- CHANNEL f1 -----
NUC1      1H
P1        13.50 usec
PL1       -2.00 dB
PL1W      13.45602226 W
SFO1      400.1324710 MHz
SI         32768
SF         400.1300080 MHz
WDW        EM
SSB        0
LB         0.30 Hz
GB         0
PC         1.00
    
```

### <sup>13</sup>C NMR (100 MHz, CS<sub>2</sub>/d<sub>6</sub>-acetone) of compound 3ea

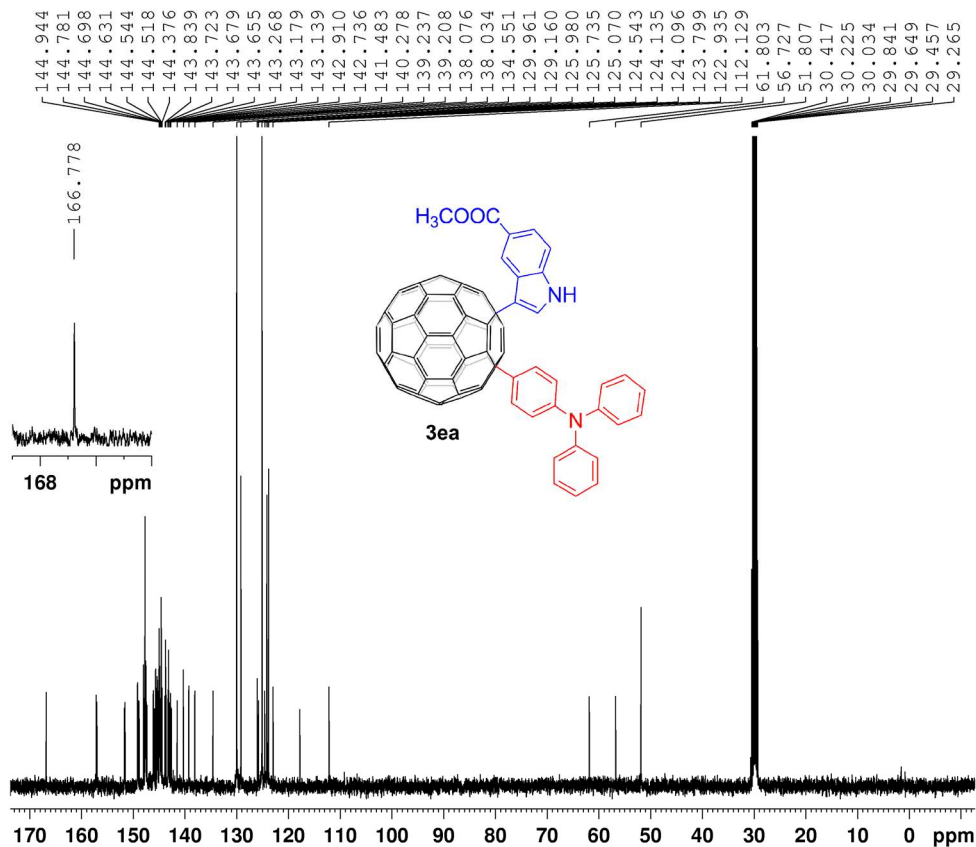

```

NAME      Dec04-2020
EXPNO    2
PROCNO    1
Date_     20201204
Time      20.17
INSTRUM   spect
PROBHD    5 mm PABBO BB-
PULPROG   zgpg30
TD         65536
SOLVENT   Acetone
NS         20480
DS         4
SWH        24038.461 Hz
FIDRES     0.366798 Hz
AQ         1.3631988 sec
RG         71.8
DW         20.800 usec
DE         6.50 usec
TE         300.0 K
D1         2.00000000 sec
D11        0.03000000 sec
TD0        1

----- CHANNEL f1 -----
NUC1      13C
P1         9.30 usec
PL1       -2.00 dB
PL1W      54.14257431 W
SFO1      100.6228298 MHz

----- CHANNEL f2 -----
CPDPRG2   waltz16
NUC2      1H
PCPD2     80.00 usec
PL2       -2.00 dB
PL12      13.46 dB
PL13      20.00 dB
PL2W      13.45602226 W
PL12W     0.38275132 W
PL13W     0.00000000 W
SFO2      400.1316005 MHz
SI         32768
SF         100.6127320 MHz
WDW        EM
SSB        0
LB         1.00 Hz
GB         0
PC         1.40
    
```

### Expanded <sup>13</sup>C NMR (100 MHz, CS<sub>2</sub>/d<sub>6</sub>-acetone) of compound 3ea

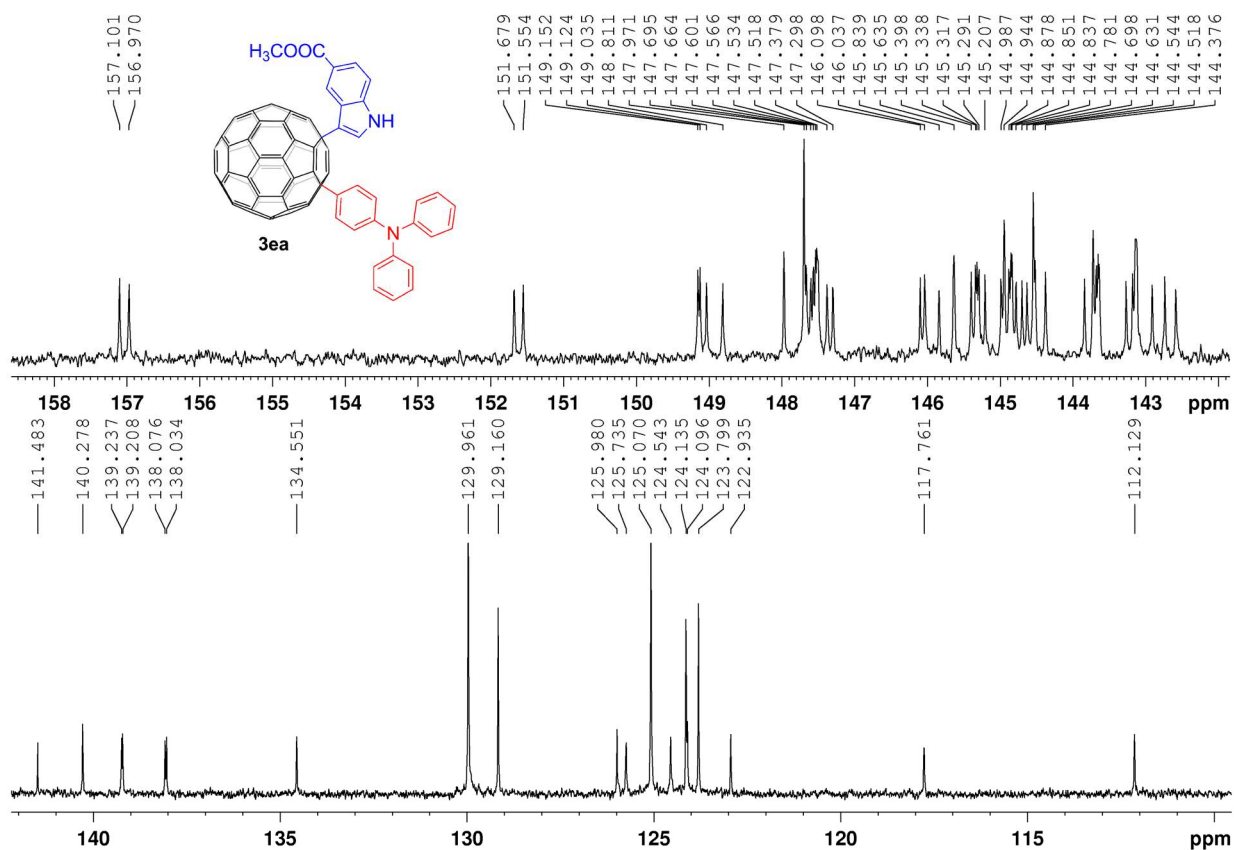

### <sup>1</sup>H NMR (400 MHz, CS<sub>2</sub>/d<sub>6</sub>-acetone) of compound 3fa

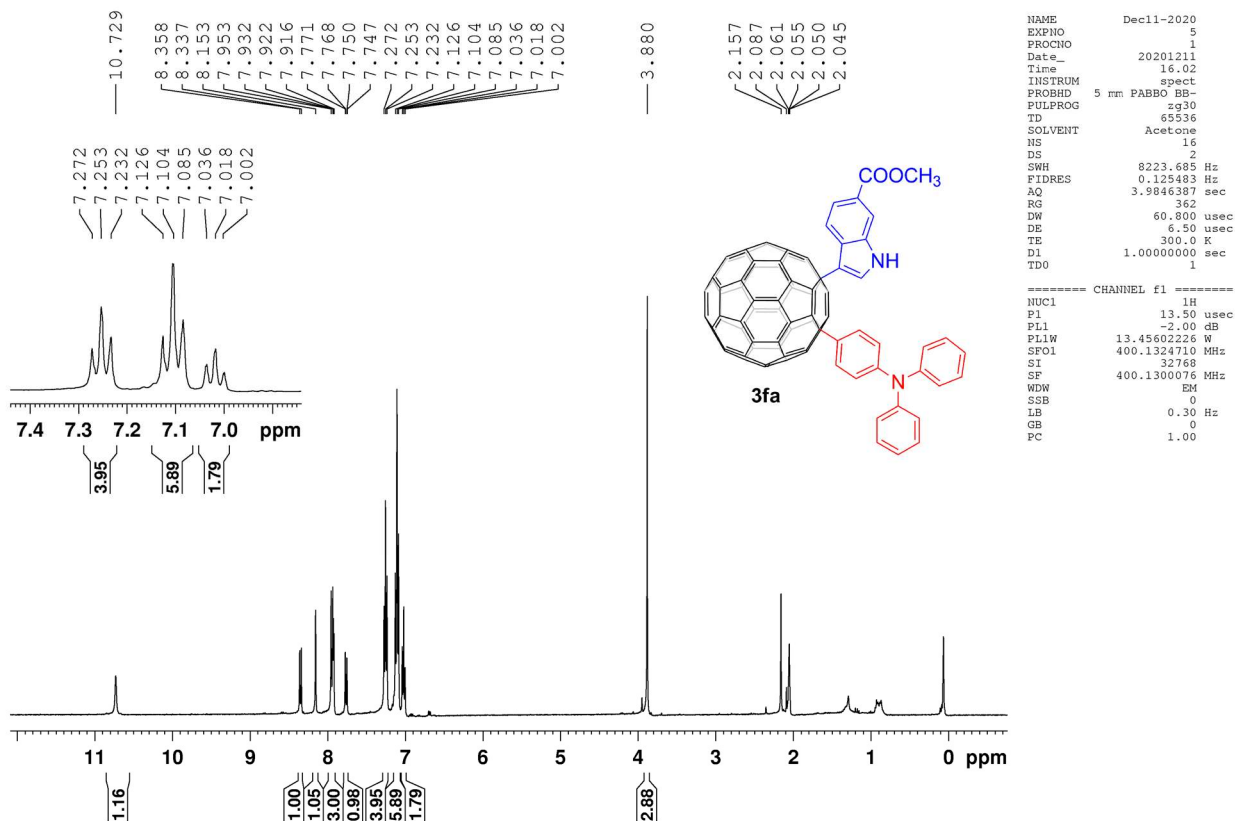

### <sup>13</sup>C NMR (100 MHz, CS<sub>2</sub>/d<sub>6</sub>-acetone) of compound 3fa

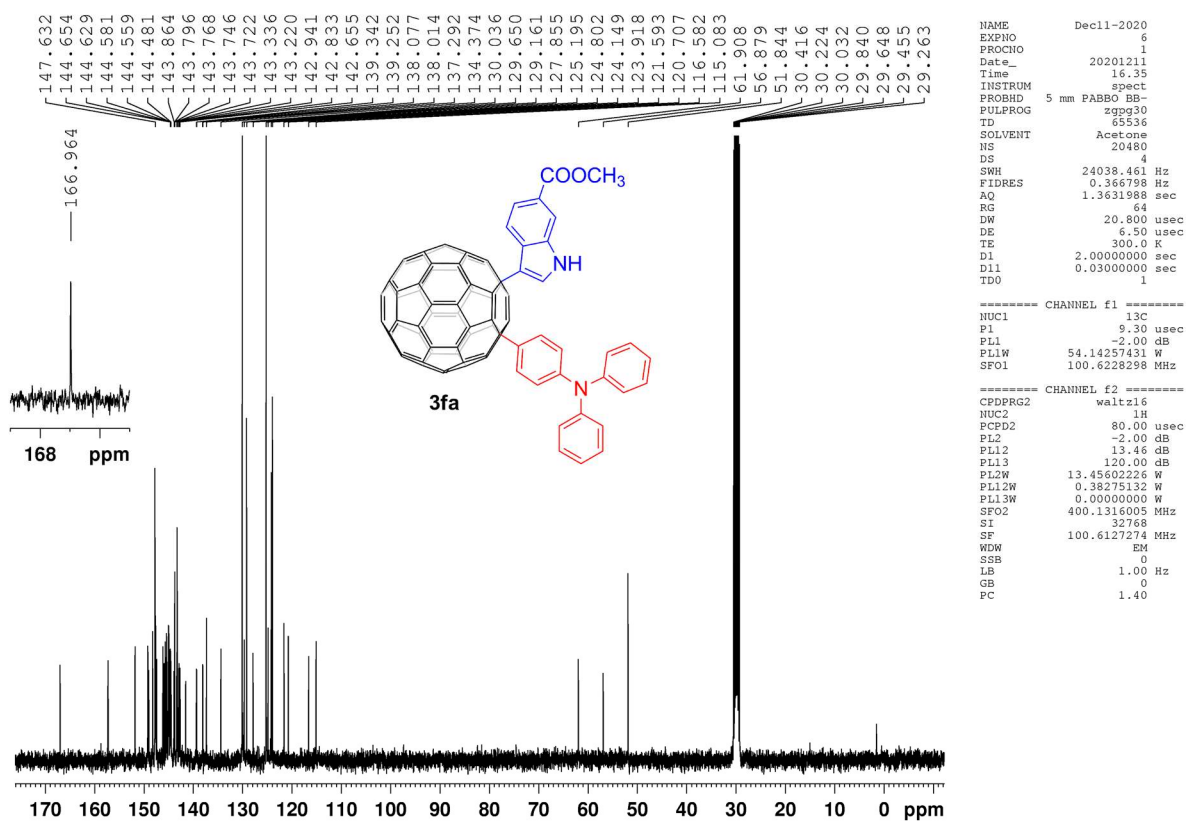

### Expanded <sup>13</sup>C NMR (100 MHz, CS<sub>2</sub>/d<sub>6</sub>-acetone) of compound 3fa

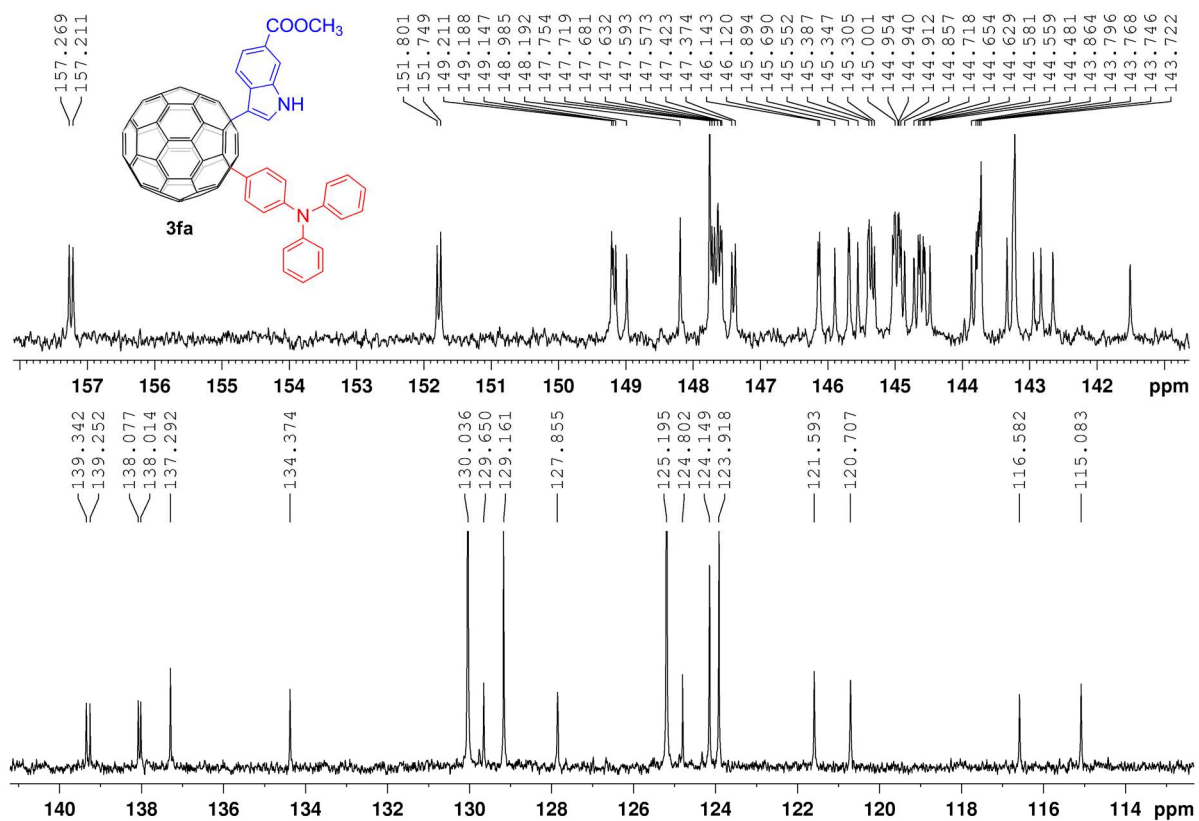

### <sup>1</sup>H NMR (400 MHz, CS<sub>2</sub>/d<sub>6</sub>-DMSO) of compound 3ga

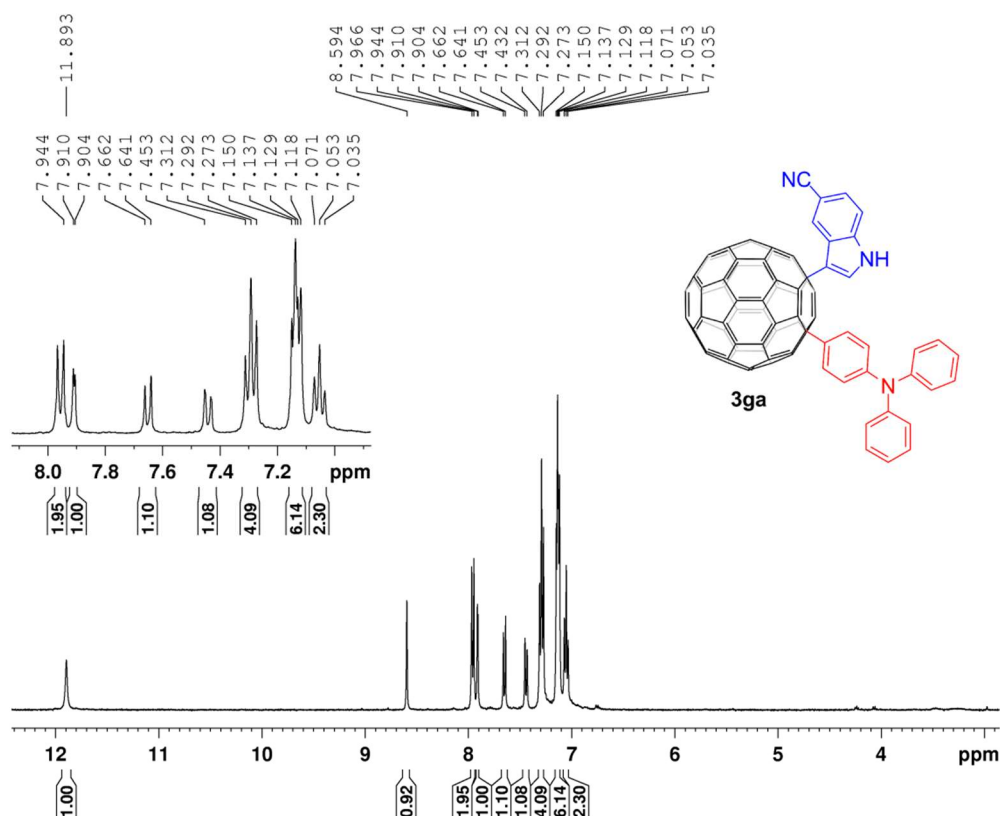

```

NAME      Dec23-2020
EXPNO    1
PROCNO   1
Date_    20201223
Time     16.53
INSTRUM  spect
PROBHD   5 mm PABBO BB-
PULPROG  zg30
TD        65536
SOLVENT  DMSO
NS        16
DS        2
SWH       8223.685 Hz
FIDRES    0.125483 Hz
AQ        3.9846397 sec
RG        362
DW        60.800 usec
DE        6.50 usec
TE        300.0 K
D1        1.00000000 sec
TDO       1
----- CHANNEL f1 -----
NUC1     1H
P1       13.50 usec
PL1      -2.00 dB
PL1W     13.45602226 W
SF01     400.1324710 MHz
SI       32768
SF       400.1300037 MHz
WDW      EM
SSB      0
LB       0.30 Hz
GB       0
PC       1.00
    
```

### <sup>13</sup>C NMR (100 MHz, CS<sub>2</sub>/d<sub>6</sub>-DMSO) of compound 3ga

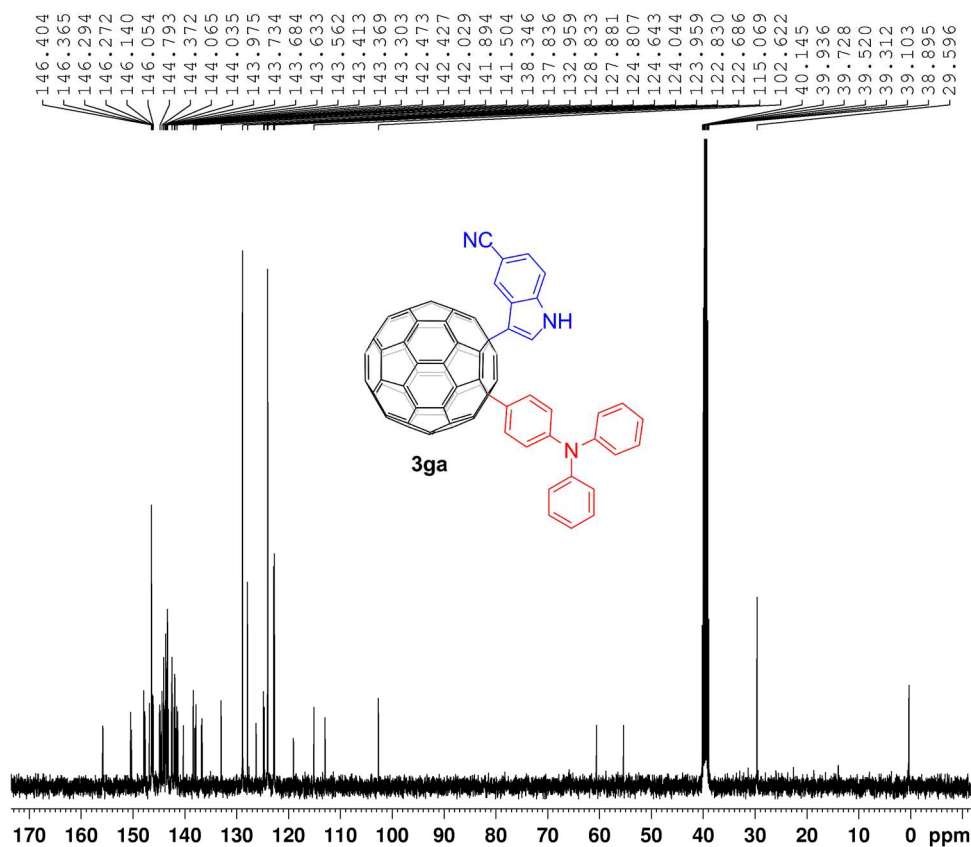

```

NAME      Dec23-2020
EXPNO    2
PROCNO   1
Date_    20201223
Time     18.42
INSTRUM  spect
PROBHD   5 mm PABBO BB-
PULPROG  zgpg30
TD        65536
SOLVENT  DMSO
NS        16359
DS        4
SWH       24038.461 Hz
FIDRES    0.366798 Hz
AQ        1.3631988 sec
RG        80.6
DW        20.800 usec
DE        6.50 usec
TE        300.0 K
D1        2.00000000 sec
D11       0.03000000 sec
TDO       1
----- CHANNEL f1 -----
NUC1     13C
P1       9.30 usec
PL1      -2.00 dB
PL1W     54.14257431 W
SF01     100.6228298 MHz
----- CHANNEL f2 -----
CPDPRG2  waltz16
NUC2     1H
PCPD2    80.00 usec
PL2      -2.00 dB
PL12     13.46 dB
PL13     120.00 dB
PL2W     13.45602226 W
PL12W    0.38275132 W
PL13W    0.00000000 W
SF02     400.1316005 MHz
SI       32768
SF       100.6128626 MHz
WDW      EM
SSB      0
LB       1.00 Hz
GB       0
PC       1.40
    
```

### Expanded <sup>13</sup>C NMR (100 MHz, CS<sub>2</sub>/d<sub>6</sub>-DMSO) of compound 3ga

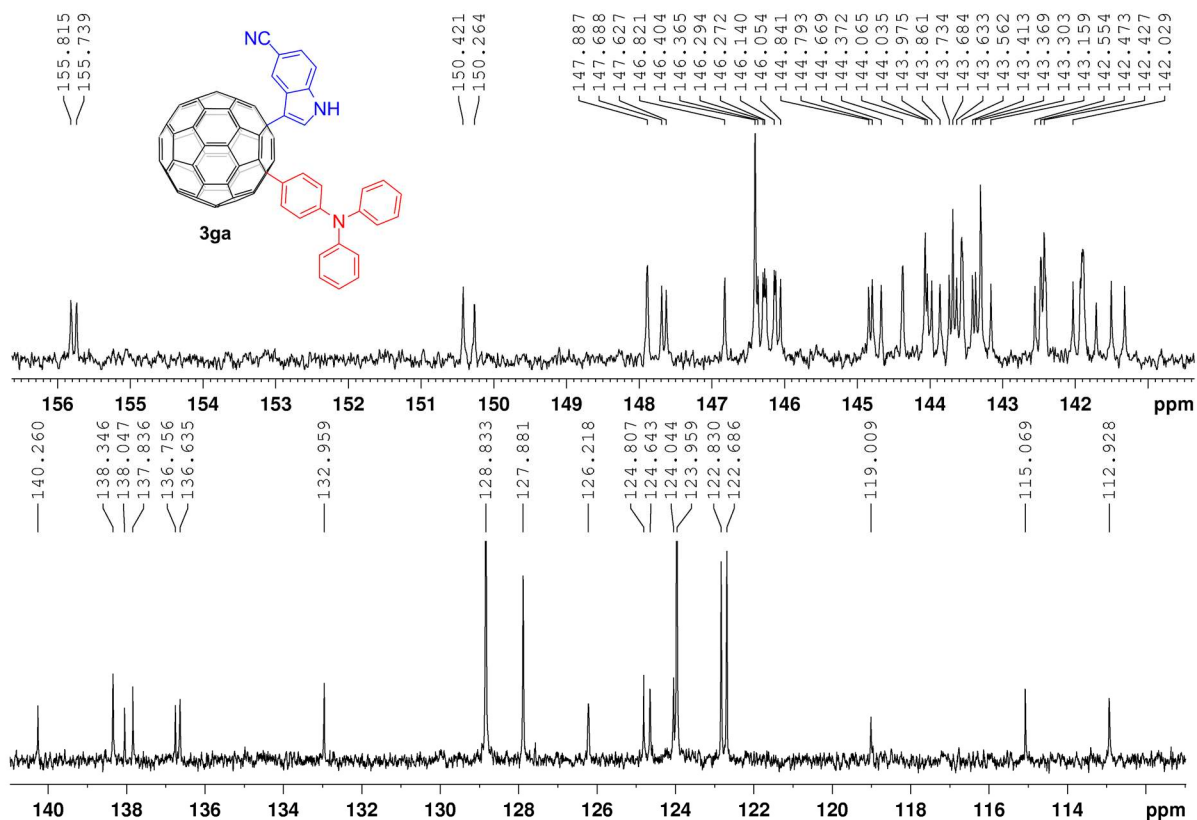

### <sup>1</sup>H NMR (400 MHz, CS<sub>2</sub>/d<sub>6</sub>-acetone) of compound 3ha

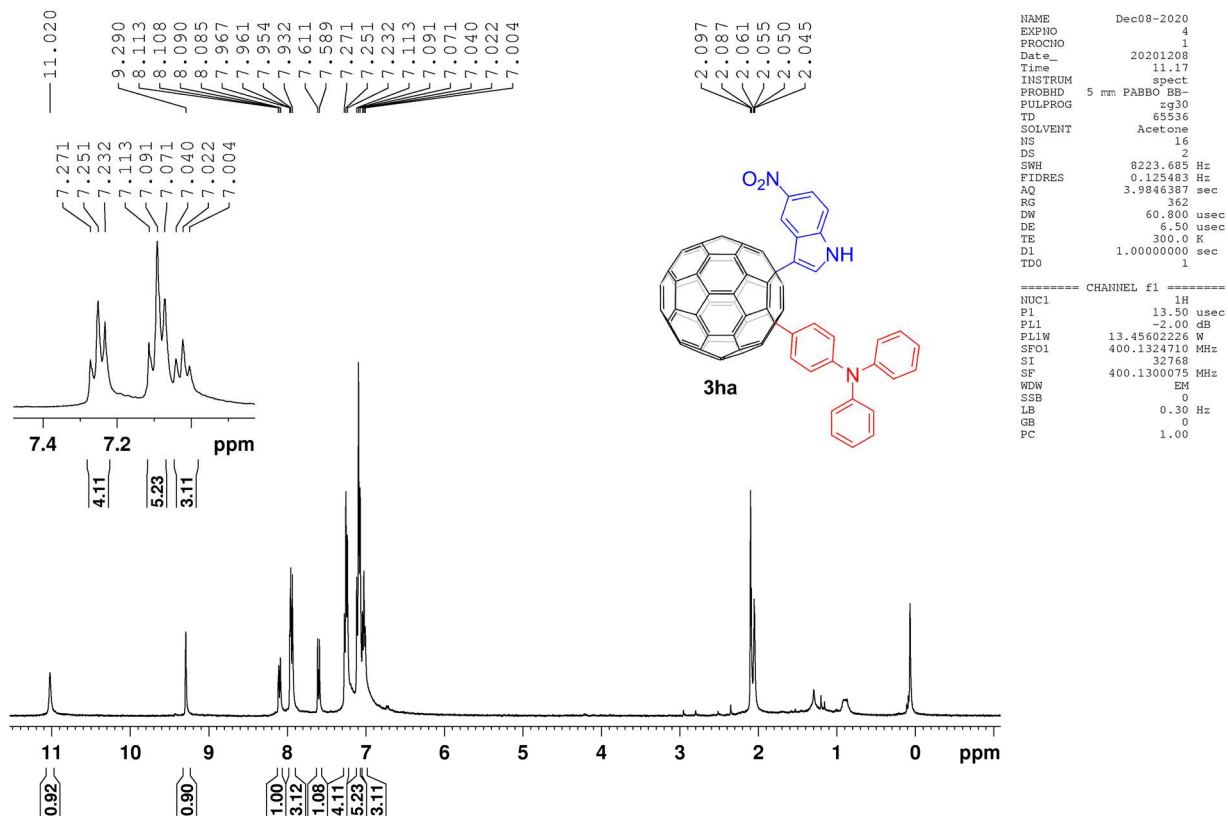

### <sup>13</sup>C NMR (100 MHz, CS<sub>2</sub>/d<sub>6</sub>-acetone) of compound 3ha

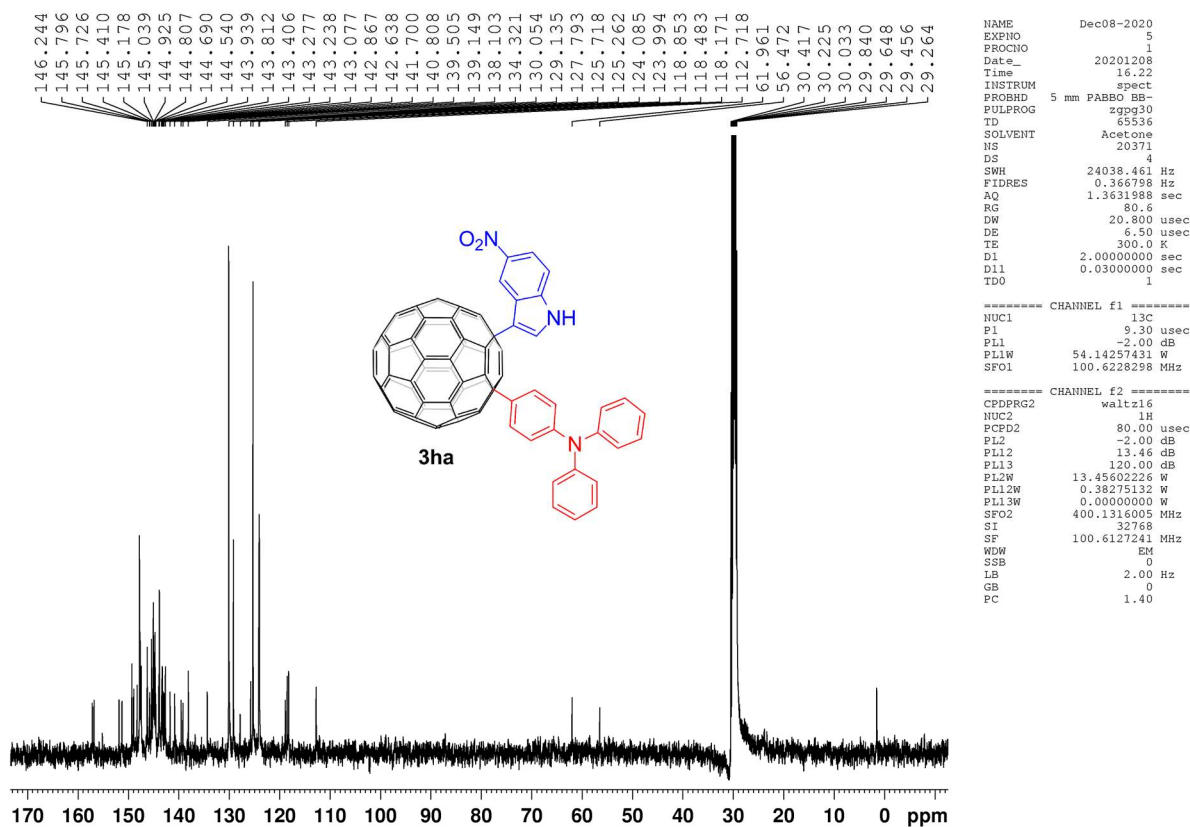

### Expanded <sup>13</sup>C NMR (100 MHz, CS<sub>2</sub>/d<sub>6</sub>-acetone) of compound 3ha

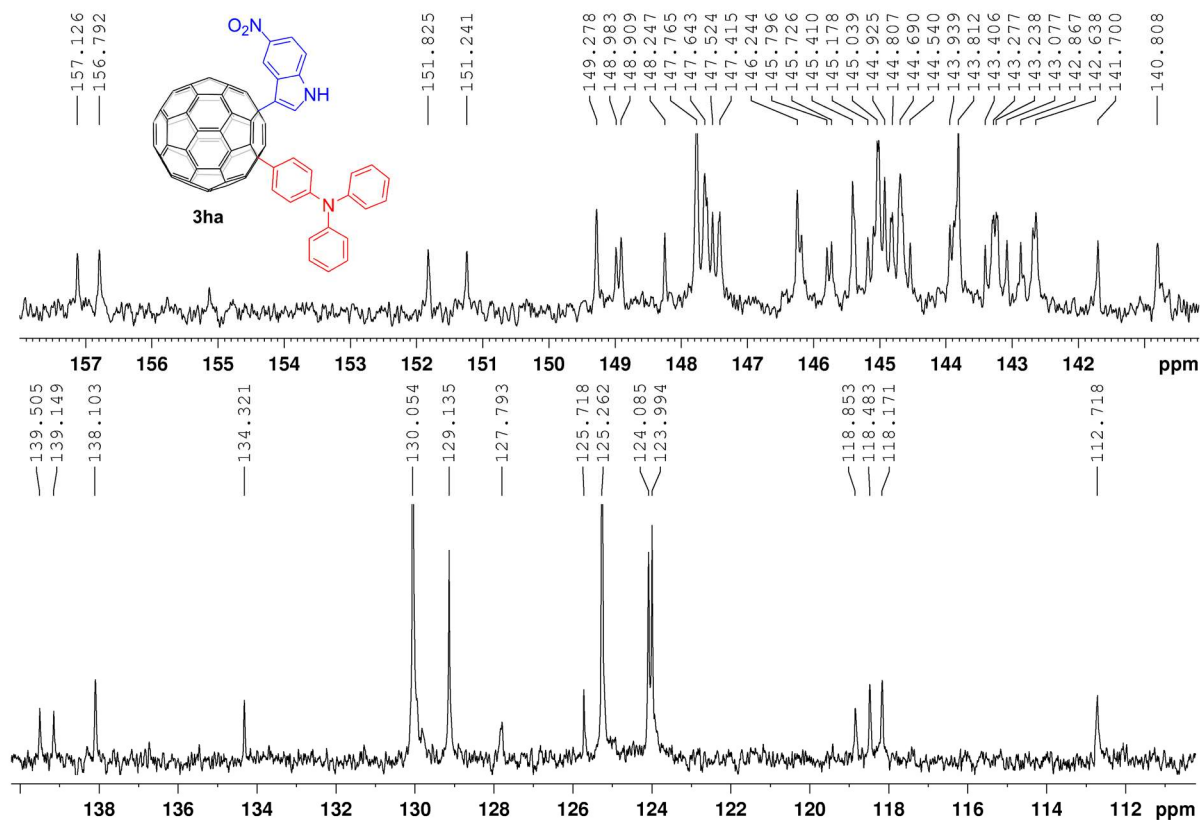

### <sup>1</sup>H NMR (400 MHz, CS<sub>2</sub>/d<sub>6</sub>-DMSO) of compound 3ia

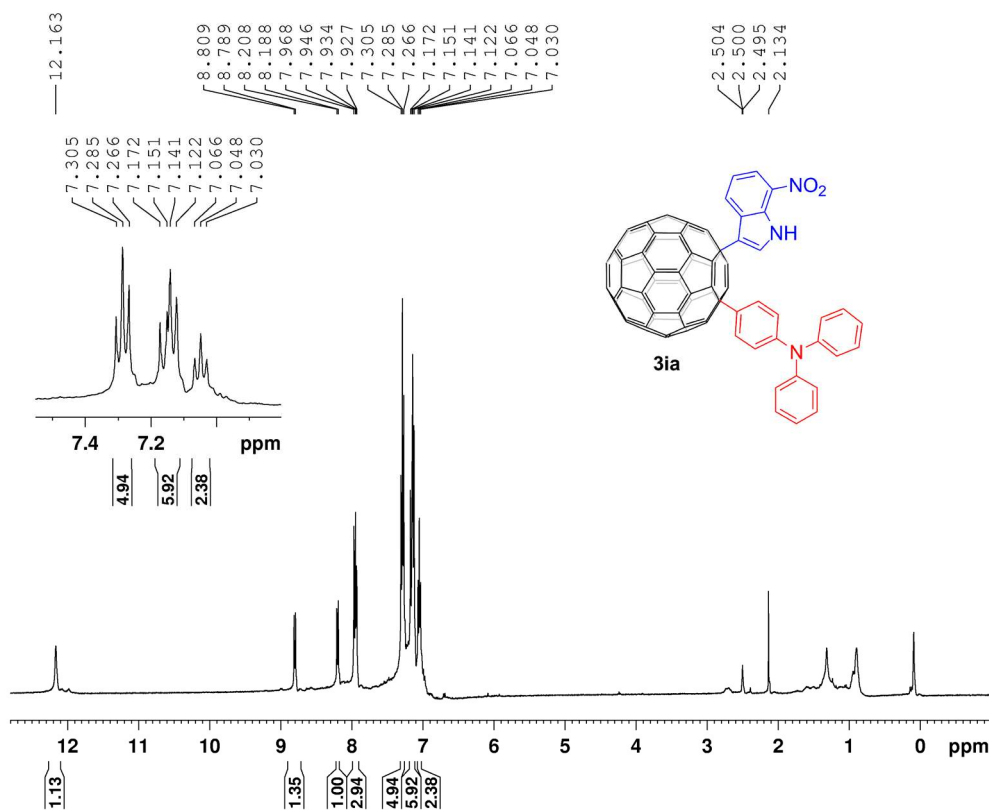

```

NAME      Dec22-2020
EXPNO    1
PROCNO   1
Date_    20201222
Time     10.35
INSTRUM  spect
PROBHD   5 mm PABBO BB-
PULPROG  zg30
TD        65536
SOLVENT  DMSO
NS        16
DS        2
SWH       8223.685 Hz
FIDRES    0.125483 Hz
AQ        3.9846387 sec
RG        362
DW        60.800 usec
DE        6.50 usec
TE        300.0 K
D1        1.00000000 sec
TDO       1
  
```

```

===== CHANNEL f1 =====
NUC1      1H
P1        13.50 usec
PL1       -2.00 dB
PL1W      13.45602226 W
SFO1      400.1324710 MHz
SI        32768
SF        400.1300046 MHz
WDW       EM
SSB       0
LB        0.30 Hz
GB        0
PC        1.00
  
```

### <sup>13</sup>C NMR (100 MHz, CS<sub>2</sub>/d<sub>6</sub>-DMSO) of compound 3ia

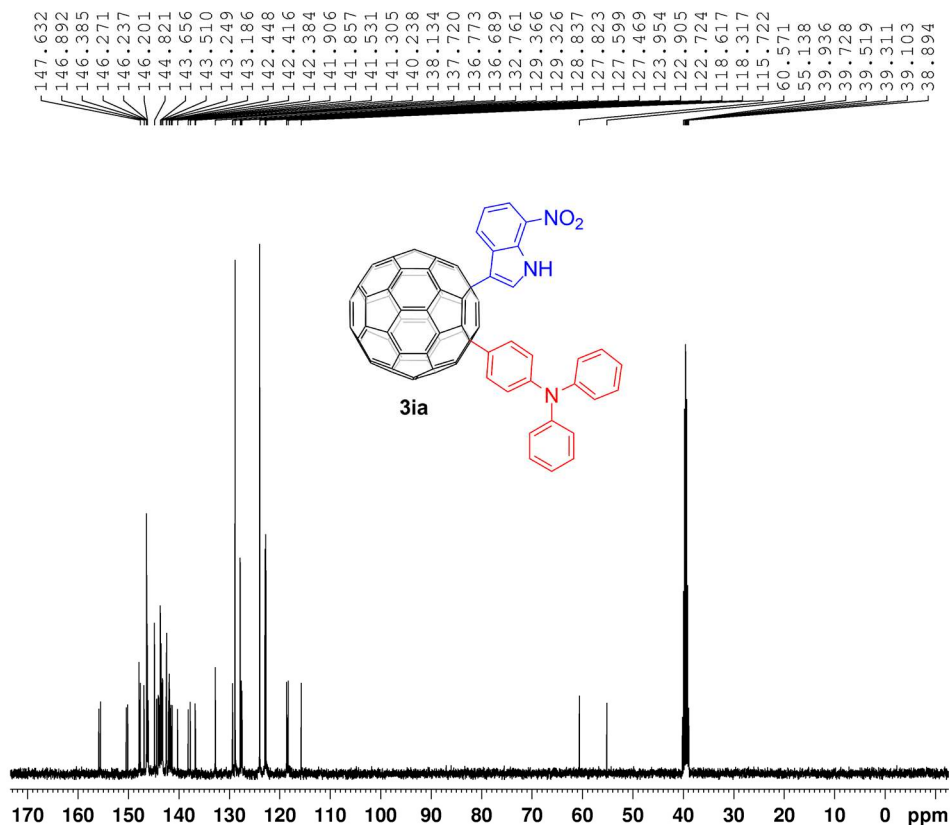

```

NAME      Apr07-2021
EXPNO    3
PROCNO   1
Date_    20210407
Time     16.34
INSTRUM  spect
PROBHD   5 mm PABBO BB-
PULPROG  zgpg30
TD        65536
SOLVENT  DMSO
NS        10240
DS        4
SWH       24038.461 Hz
FIDRES    0.366798 Hz
AQ        1.3631988 sec
RG        90.5
DW        20.800 usec
DE        6.50 usec
TE        300.0 K
D1        2.00000000 sec
D11       0.03000000 sec
TDO       1
  
```

```

===== CHANNEL f1 =====
NUC1      13C
P1        9.30 usec
PL1       -2.00 dB
PL1W      54.14257431 W
SFO1      100.6228298 MHz
  
```

```

===== CHANNEL f2 =====
CPDPRG2  waltz16
NUC2      1H
PCPD2    80.00 usec
PL2       -2.00 dB
PL12     13.46 dB
PL13     120.00 dB
PL2W     13.45602226 W
PL12W    0.38275132 W
PL13W    0.00000000 W
SFO2     400.1316005 MHz
SI        32768
SF        100.6128618 MHz
WDW       EM
SSB       0
LB        1.00 Hz
GB        0
PC        1.40
  
```



### Expanded <sup>13</sup>C NMR (100 MHz, CS<sub>2</sub>/d<sub>6</sub>-DMSO) of compound 3ia

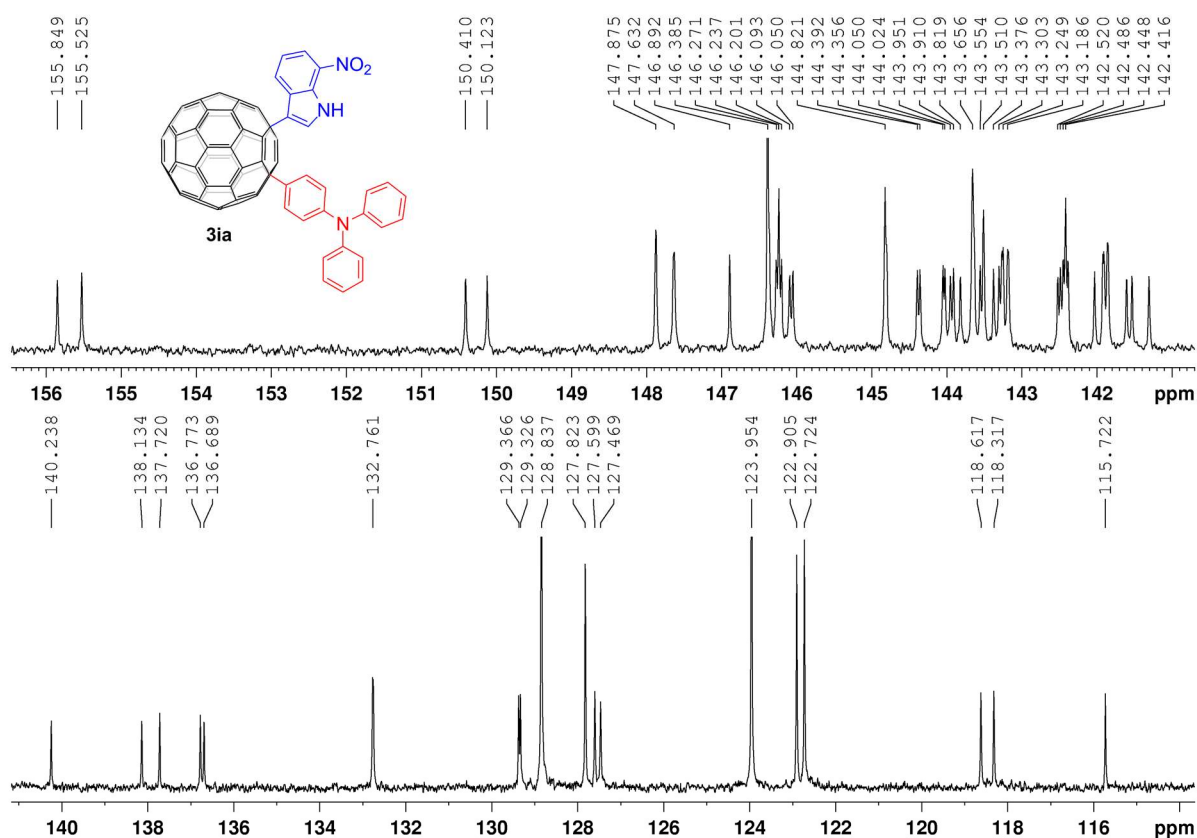

### <sup>1</sup>H NMR (400 MHz, CS<sub>2</sub>/d<sub>6</sub>-acetone) of compound 3ja

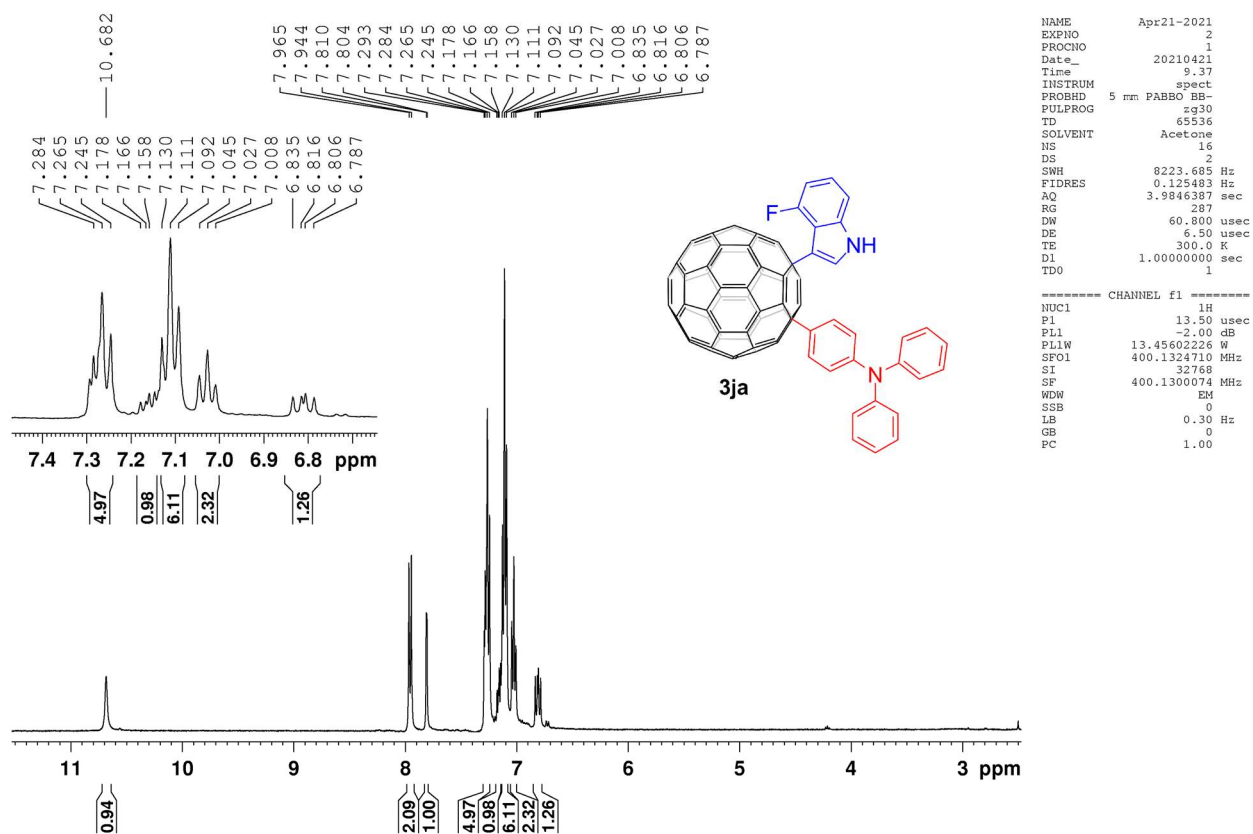

### <sup>13</sup>C NMR (100 MHz, CS<sub>2</sub>/d<sub>6</sub>-acetone) of compound 3ja

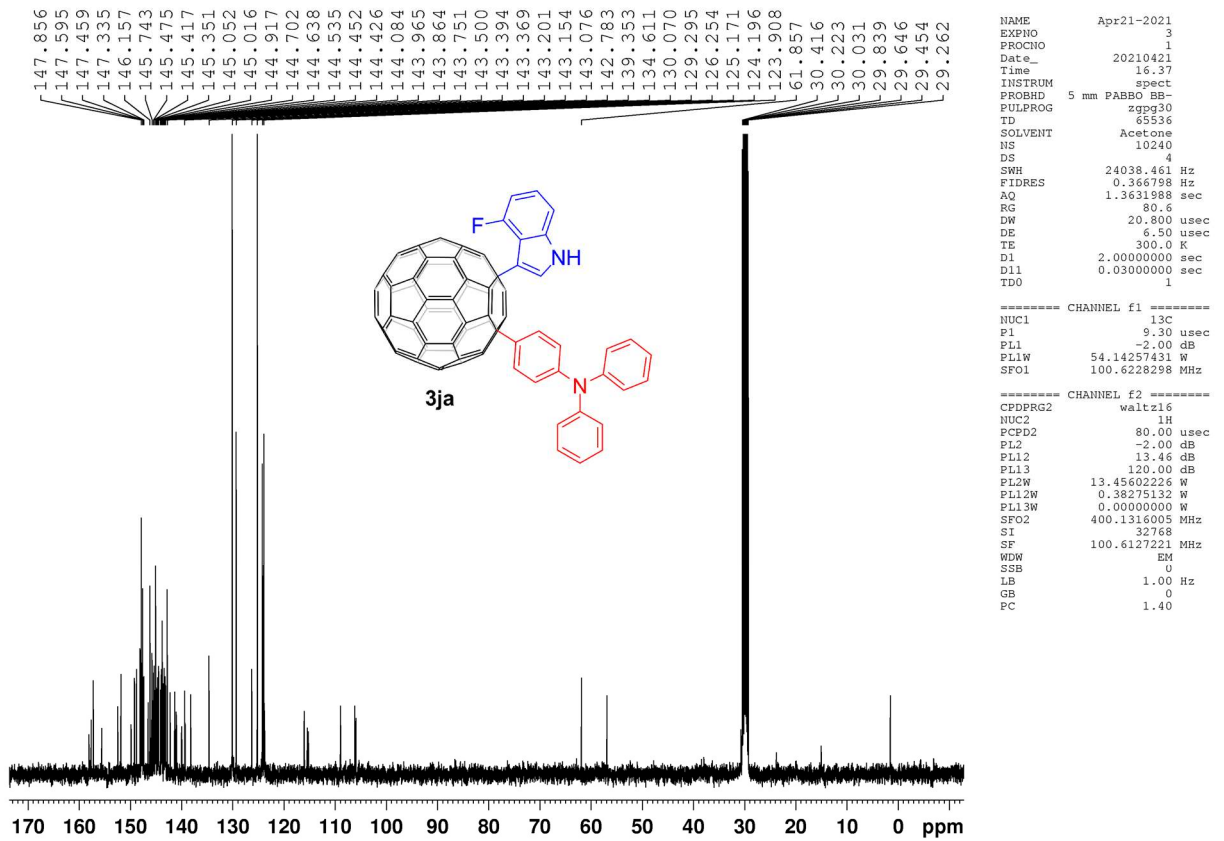

### Expanded <sup>13</sup>C NMR (100 MHz, CS<sub>2</sub>/d<sub>6</sub>-acetone) of compound 3ja

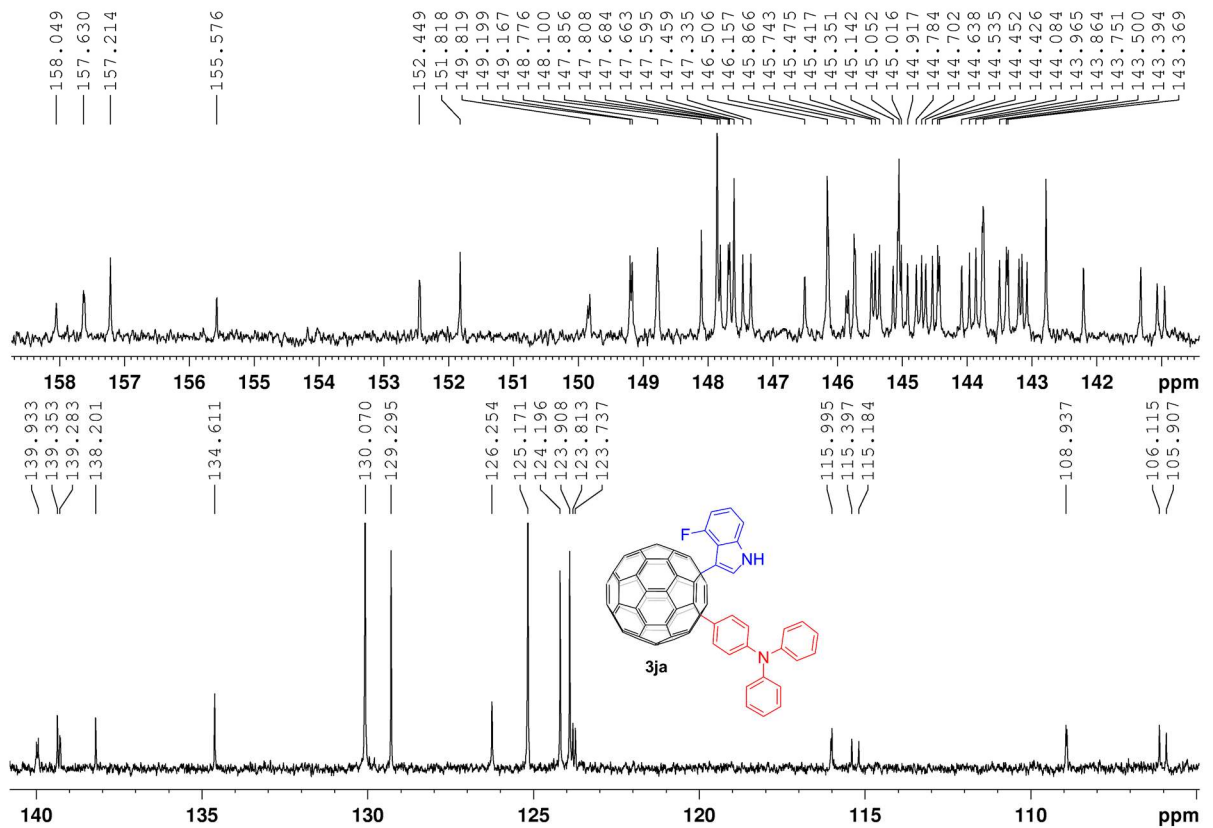

### <sup>1</sup>H NMR (400 MHz, CS<sub>2</sub>/d<sub>6</sub>-acetone) of compound 3ab

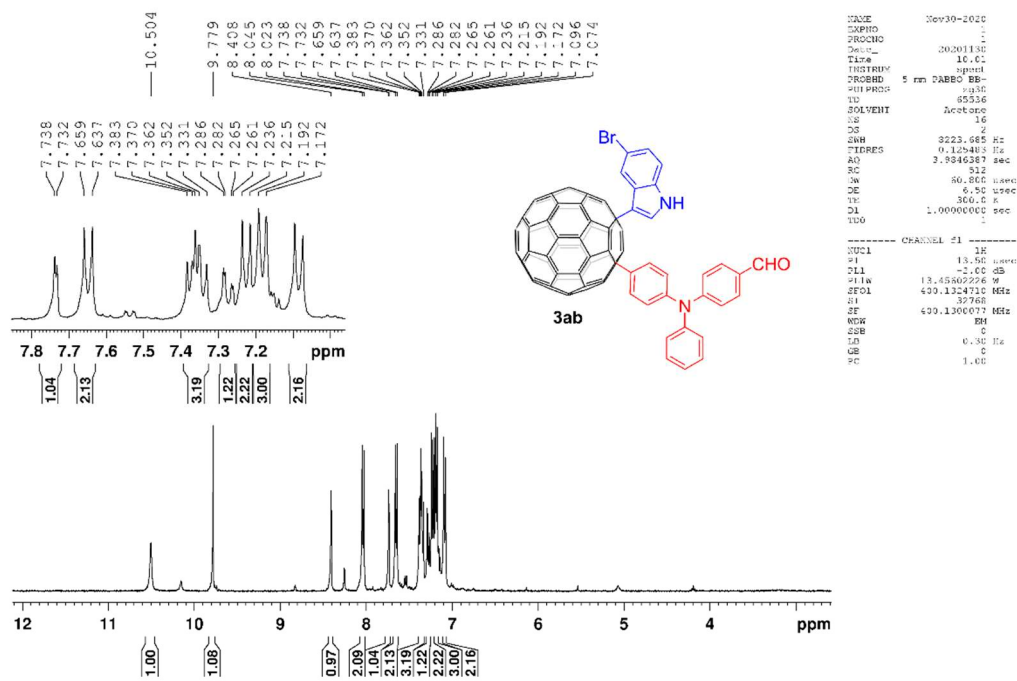

### <sup>13</sup>C NMR (100 MHz, CS<sub>2</sub>/d<sub>6</sub>-acetone) of compound 3ab

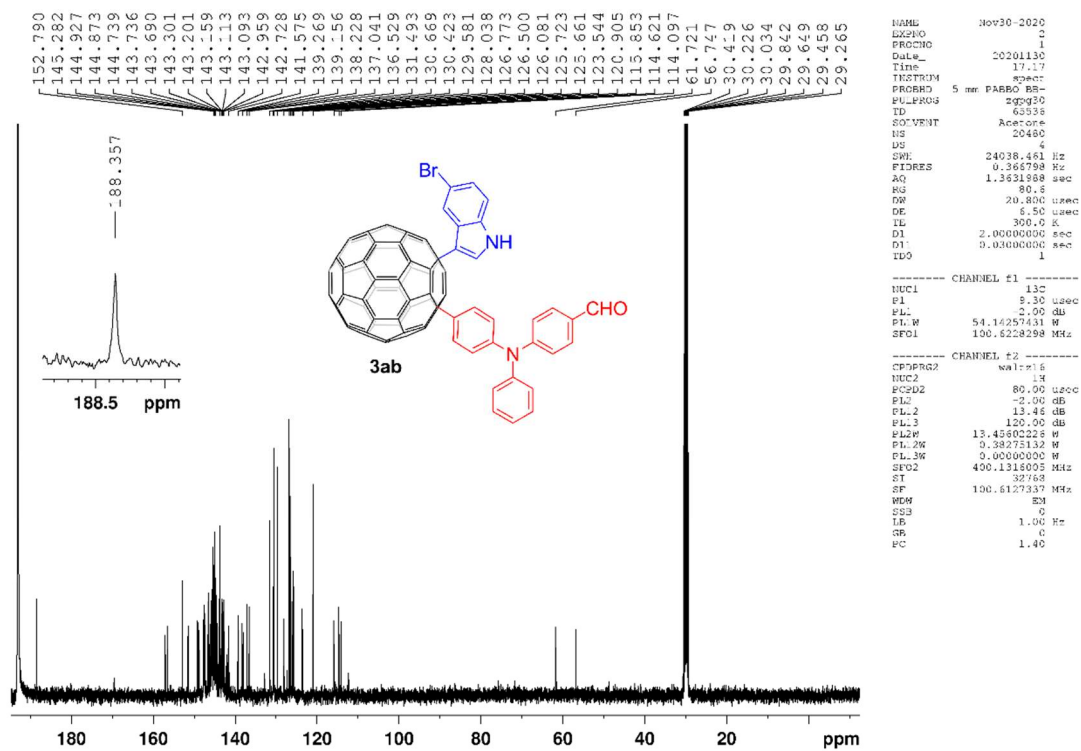

### Expanded <sup>13</sup>C NMR (100 MHz, CS<sub>2</sub>/d<sub>6</sub>-acetone) of compound 3ab

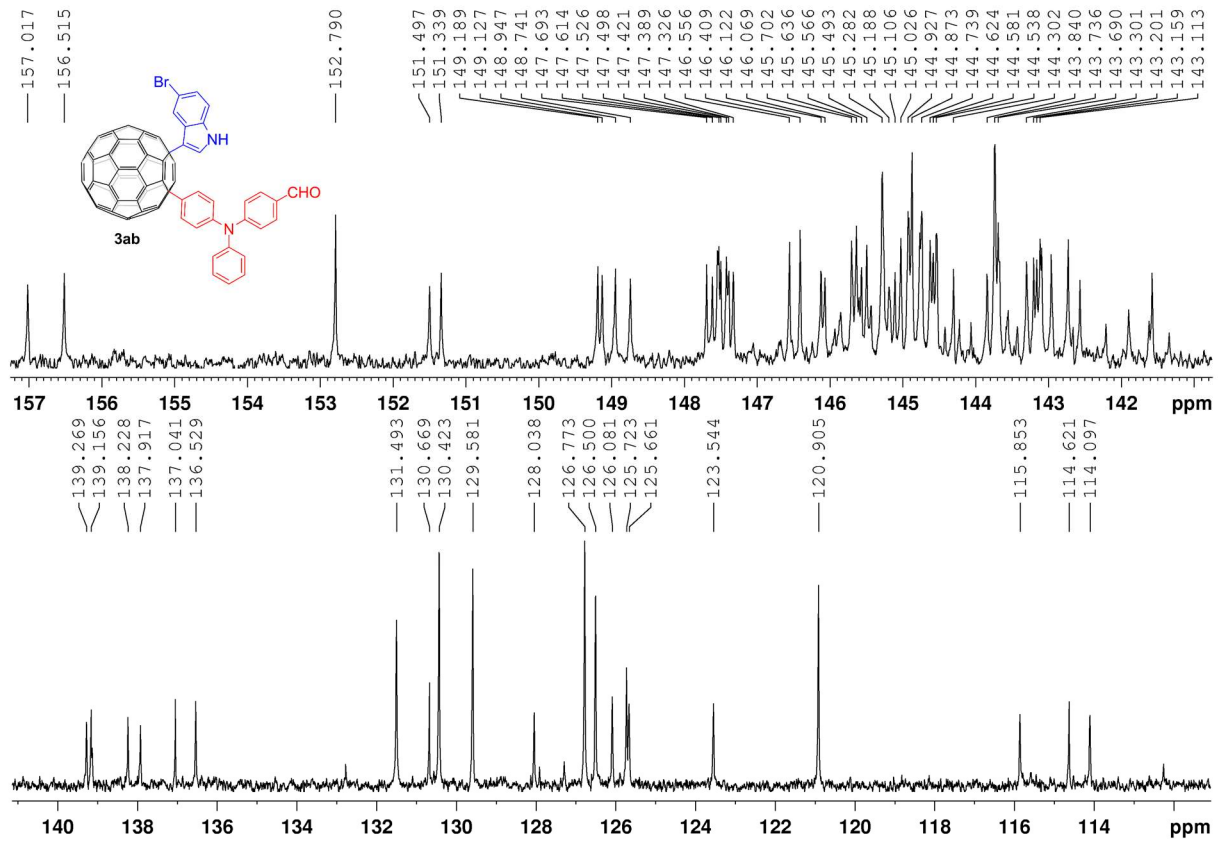

### <sup>1</sup>H NMR (400 MHz, CS<sub>2</sub>/d<sub>6</sub>-DMSO) of compound 3fb

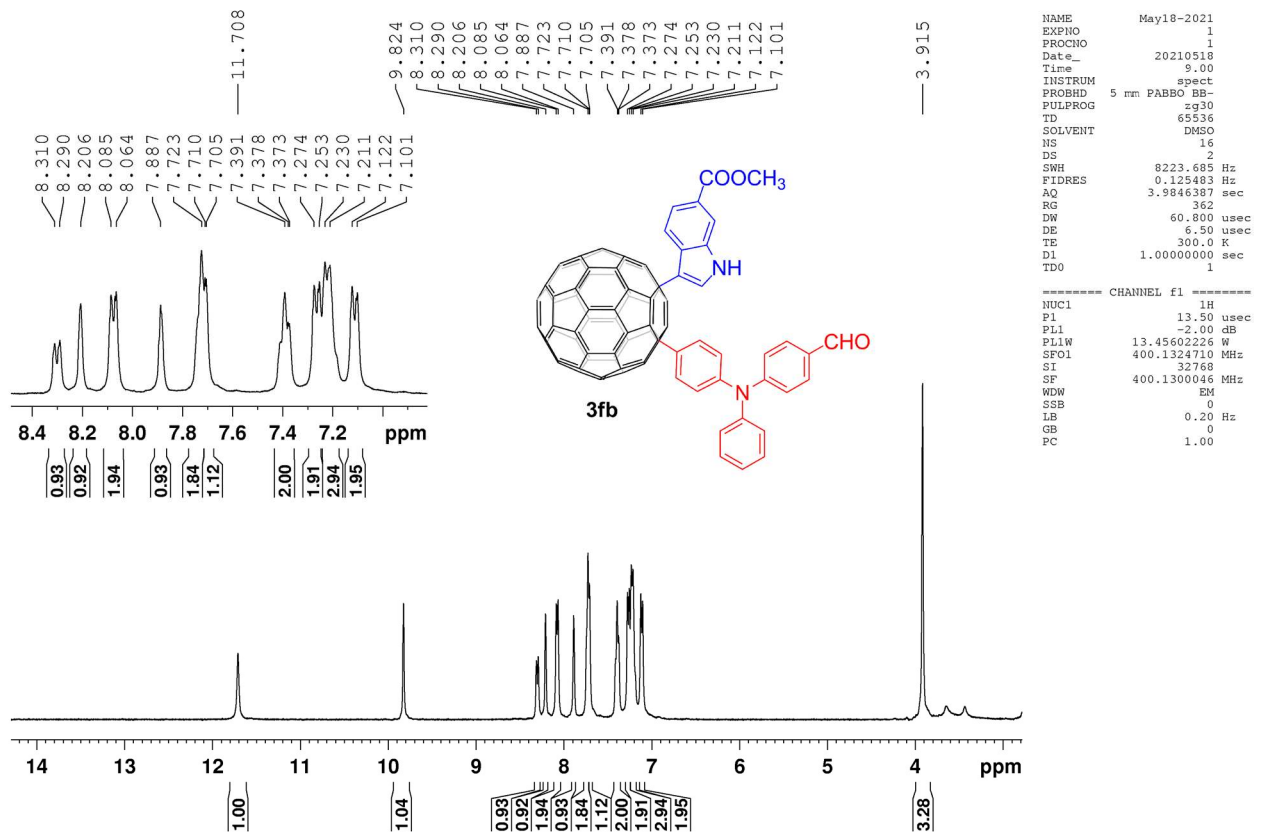

### <sup>13</sup>C NMR (100 MHz, CS<sub>2</sub>/d<sub>6</sub>-DMSO) of compound 3fb

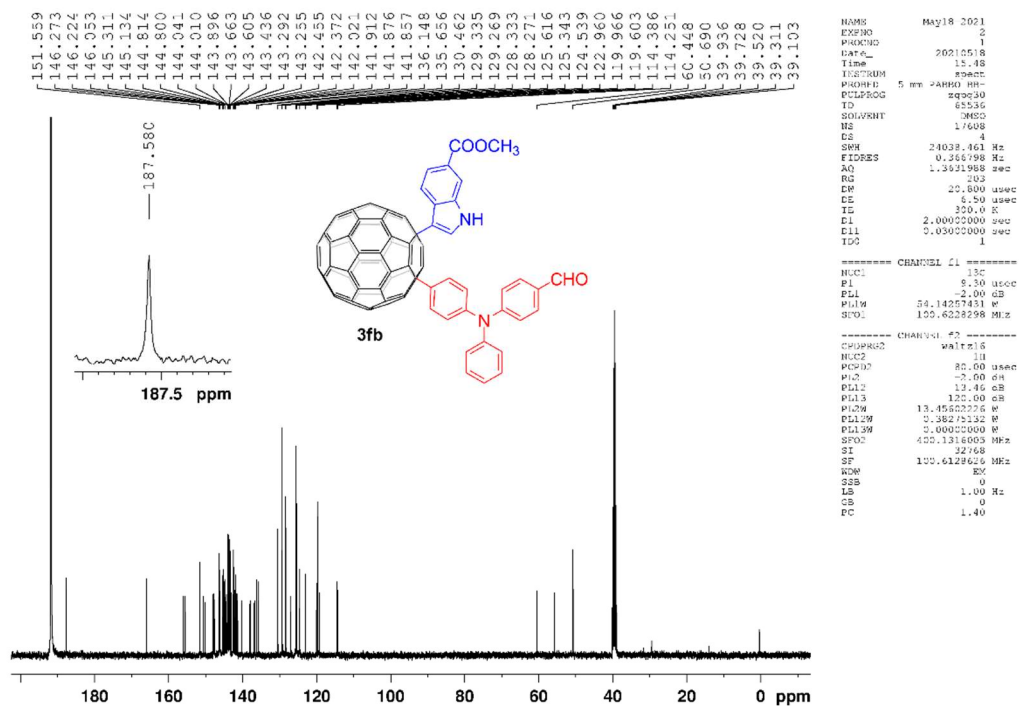

### Expanded <sup>13</sup>C NMR (100 MHz, CS<sub>2</sub>/d<sub>6</sub>-DMSO) of compound 3fb

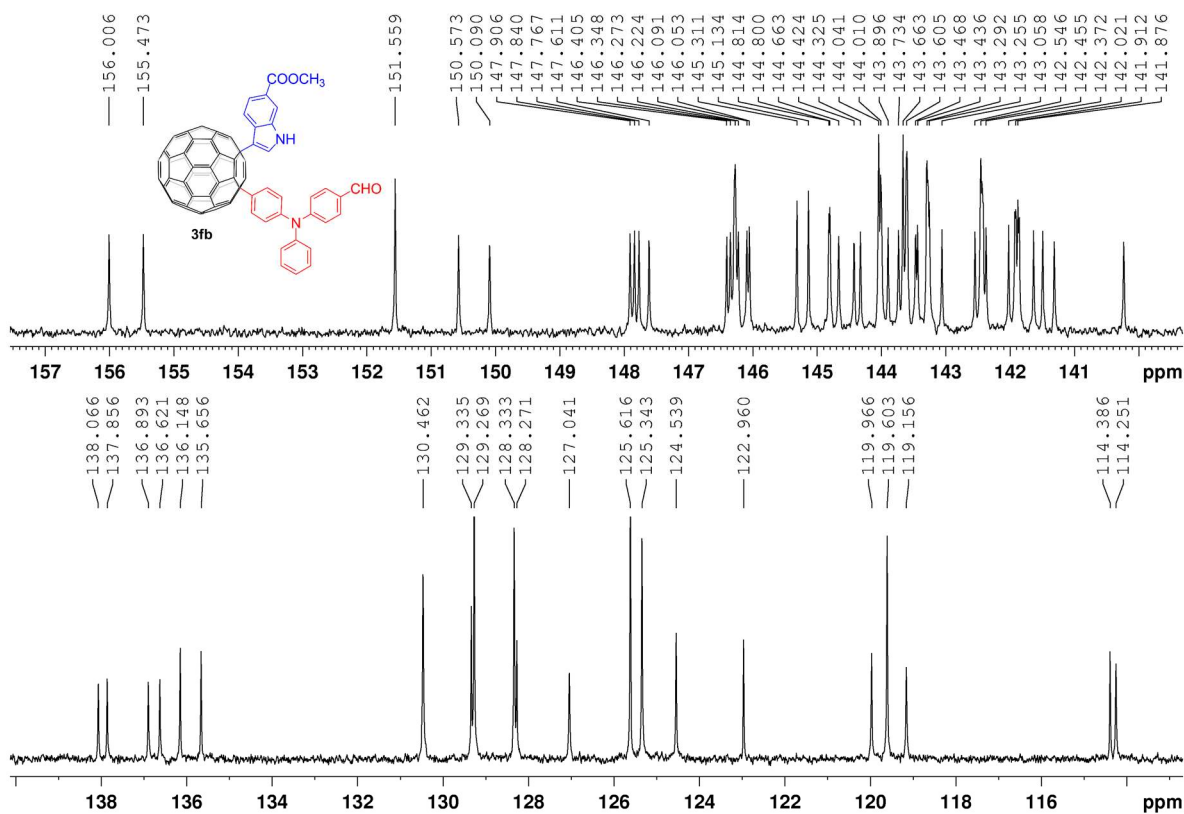

### <sup>1</sup>H NMR (400 MHz, CS<sub>2</sub>/d<sub>6</sub>-acetone) of compound 3ac

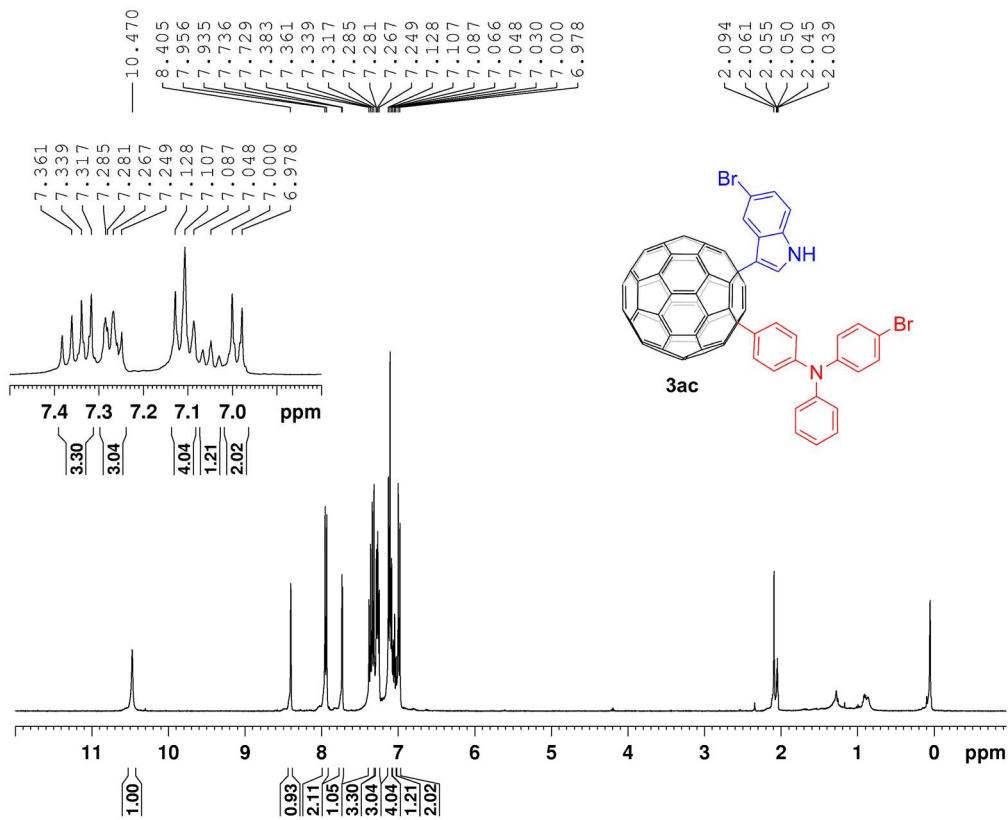

```

NAME      Dec09-2020
EXPNO    1
PROCNO   1
Date_    20201209
Time     19.22
INSTRUM  spect
PROBHD   5 mm PABBO BB-
PULPROG  zg30
TD        65536
SOLVENT  Acetone
NS        16
DS        2
SWH       8223.685 Hz
FIDRES   0.125483 Hz
AQ        3.9846387 sec
RG        362
DW        60.800 usec
DE        6.50 usec
TE        300.0 K
D1        1.00000000 sec
TDO       1
    
```

```

===== CHANNEL f1 =====
NUC1     1H
P1       13.50 usec
PL1      -2.00 dB
PL1W    13.45602226 W
SF01    400.1324710 MHz
SI       32768
SF       400.1300076 MHz
WDW      EM
SSB      0
LB       0.30 Hz
GB       0
PC       1.00
    
```

### <sup>13</sup>C NMR (100 MHz, CS<sub>2</sub>/d<sub>6</sub>-acetone) of compound 3ac

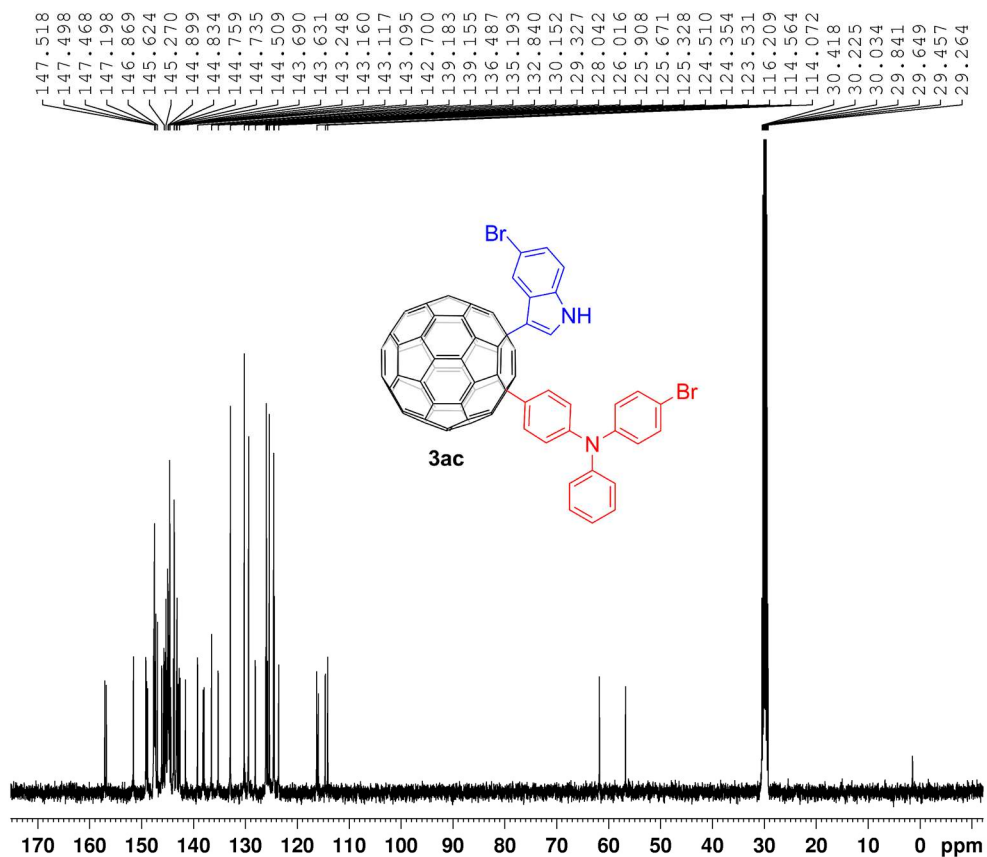

```

NAME      Dec09-2020
EXPNO    2
PROCNO   1
Date_    20201209
Time     19.28
INSTRUM  spect
PROBHD   5 mm PABBO BB-
PULPROG  zgpg30
TD        65536
SOLVENT  Acetone
NS        15360
DS        4
SWH       24038.461 Hz
FIDRES   0.366798 Hz
AQ        1.3631988 sec
RG        80.6
DW        20.800 usec
DE        6.50 usec
TE        300.0 K
D1        2.00000000 sec
D11       0.03000000 sec
TDO       1
    
```

```

===== CHANNEL f1 =====
NUC1     13C
P1       9.30 usec
PL1      -2.00 dB
PL1W    54.14257431 W
SF01    100.6228298 MHz
    
```

```

===== CHANNEL f2 =====
CPDPRG2  waltz16
NUC2     1H
PCPD2    80.00 usec
PL2      -2.00 dB
PL12     13.46 dB
PL13     120.00 dB
PL2W    13.45602226 W
PL12W    0.38275132 W
PL13W    0.00000000 W
SF02    400.1316005 MHz
SI       32768
SF       100.6127365 MHz
WDW      EM
SSB      0
LB       1.00 Hz
GB       0
PC       1.40
    
```

### Expanded <sup>13</sup>C NMR (100 MHz, CS<sub>2</sub>/d<sub>6</sub>-acetone) of compound 3ac

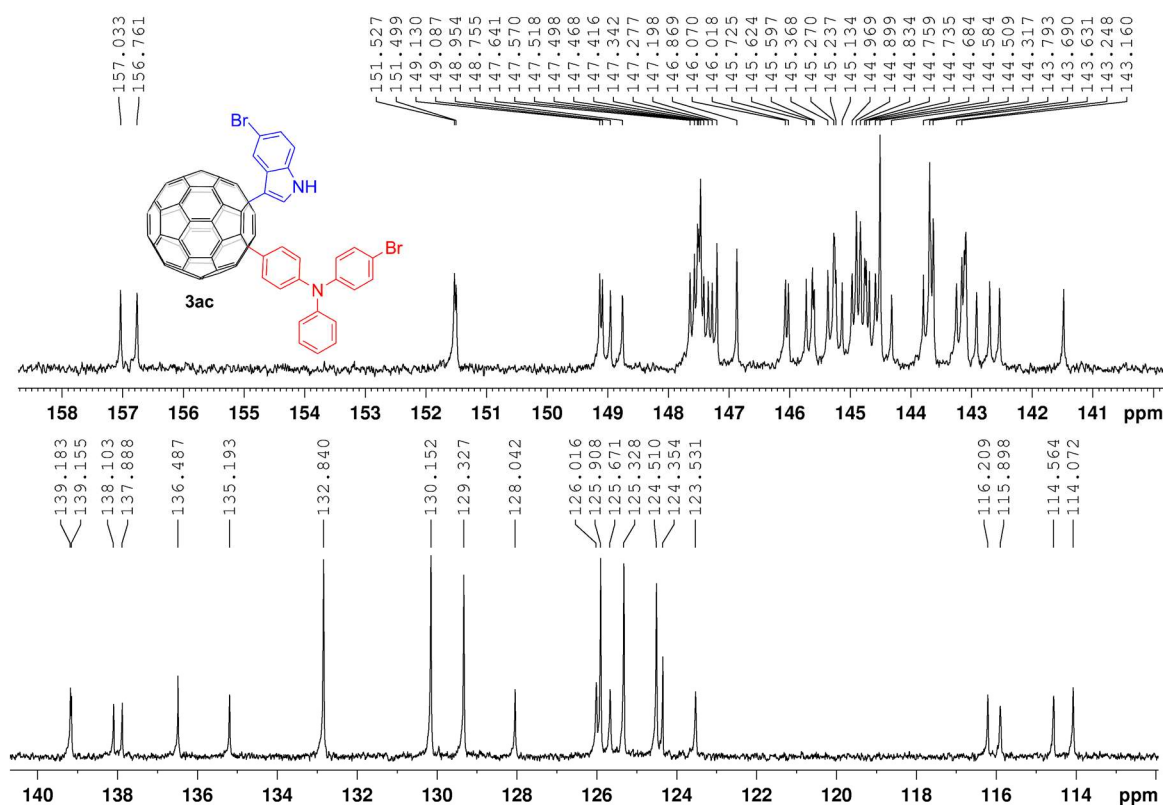

### <sup>1</sup>H NMR (400 MHz, CS<sub>2</sub>/d<sub>6</sub>-acetone) of compound 3fc

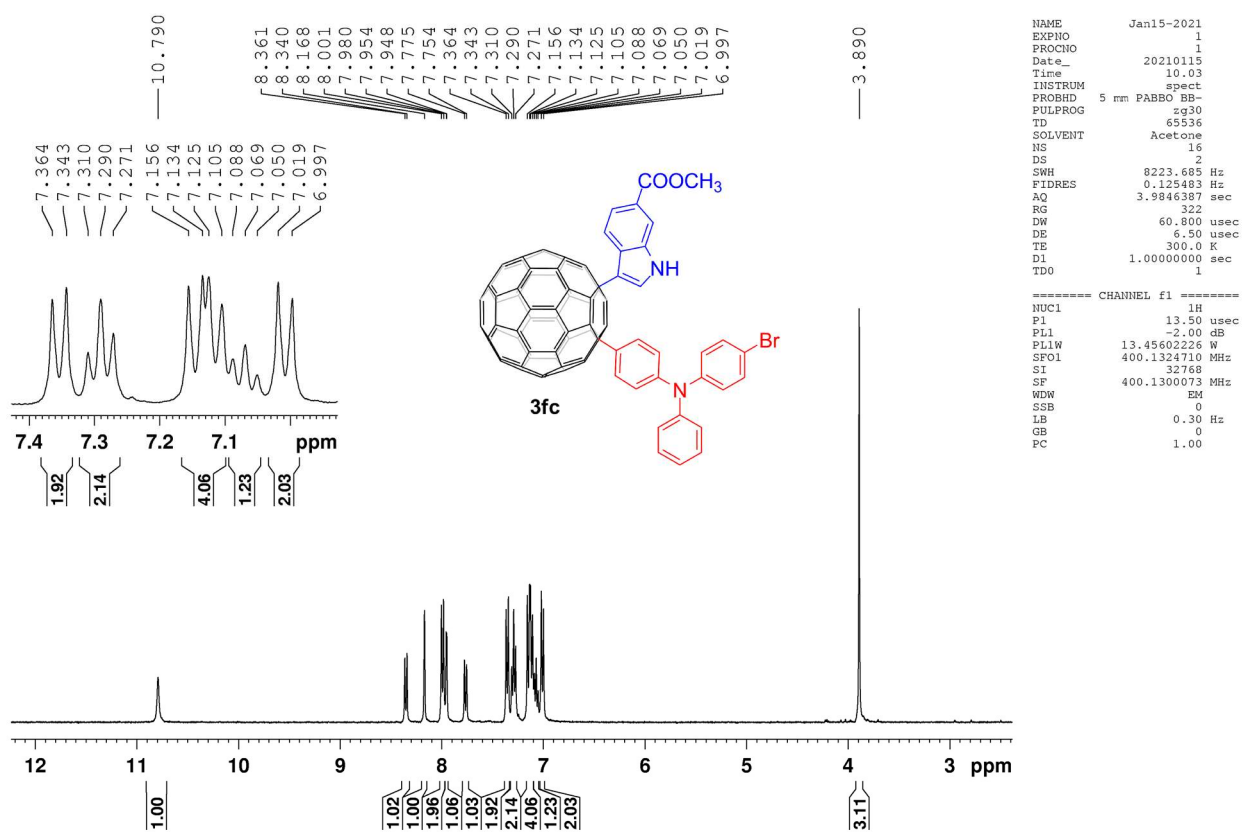

### <sup>13</sup>C NMR (100 MHz, CS<sub>2</sub>/d<sub>6</sub>-acetone) of compound 3fc

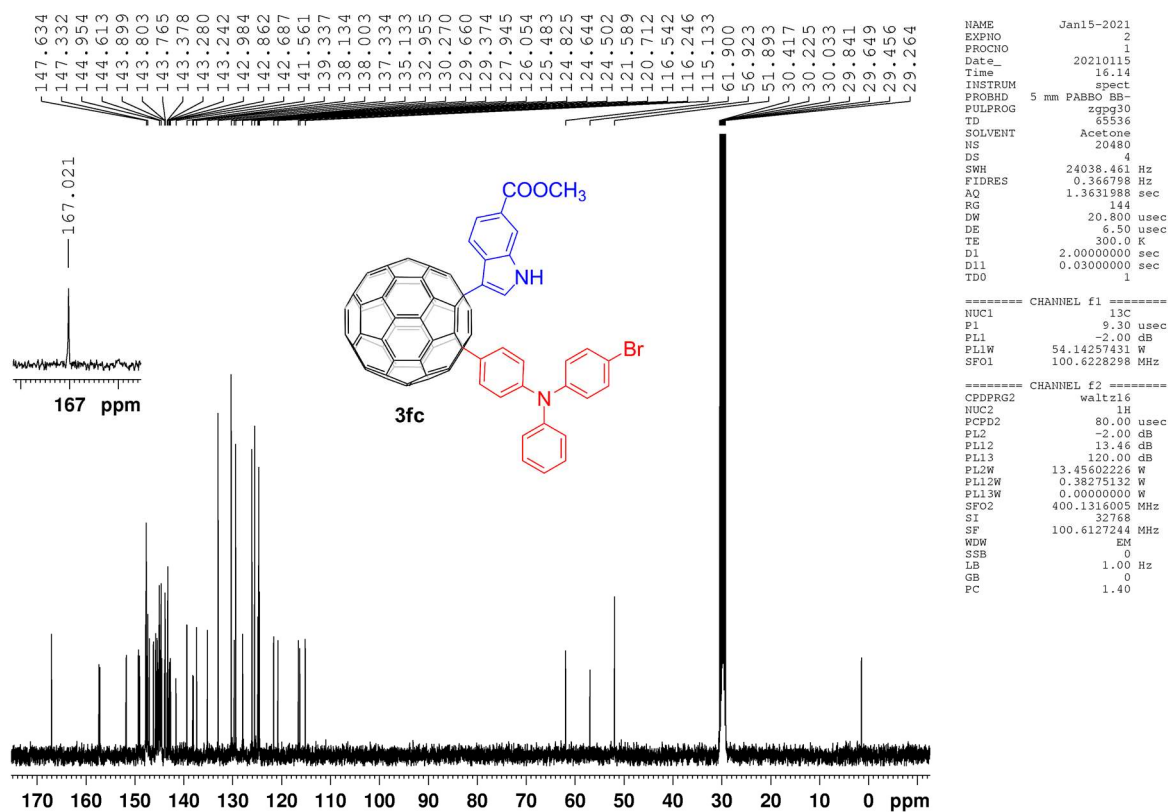

### Expanded <sup>13</sup>C NMR (100 MHz, CS<sub>2</sub>/d<sub>6</sub>-acetone) of compound 3fc

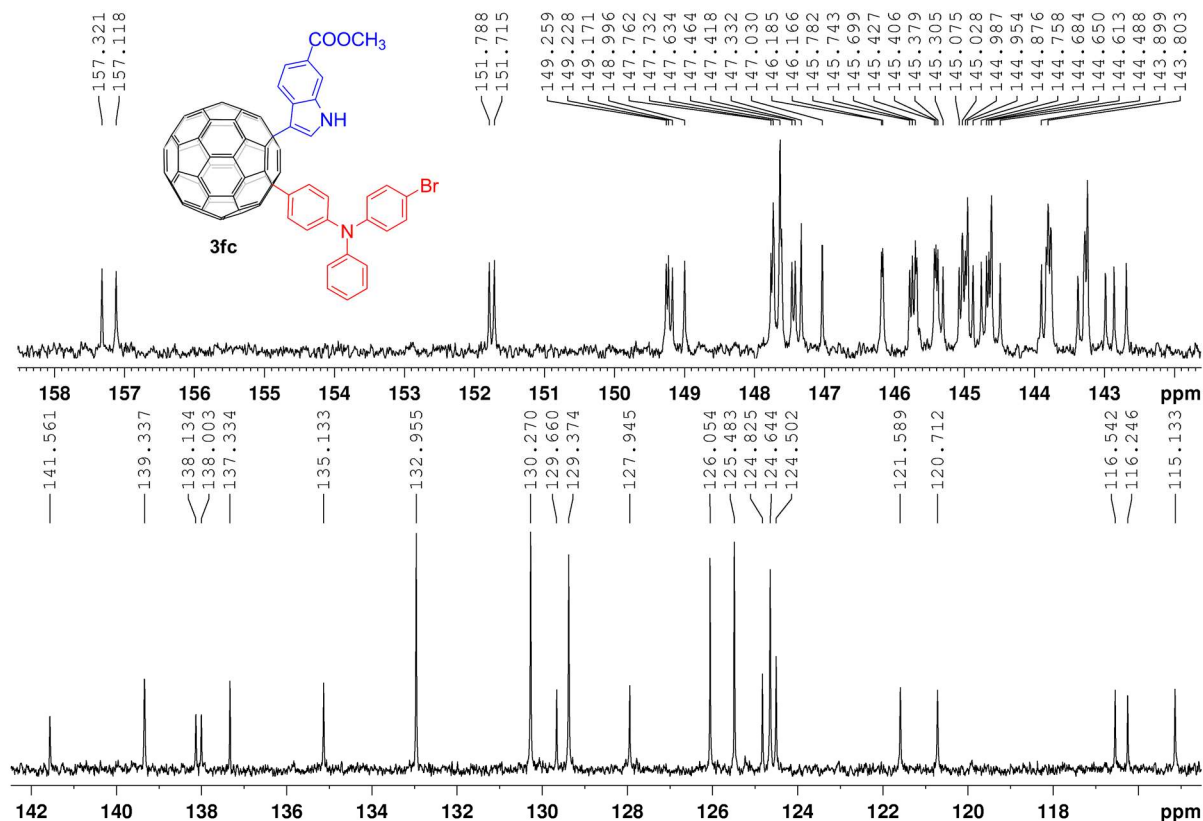



<sup>1</sup>H NMR (400 MHz, CS<sub>2</sub>/d<sub>6</sub>-acetone) of compound 3ad

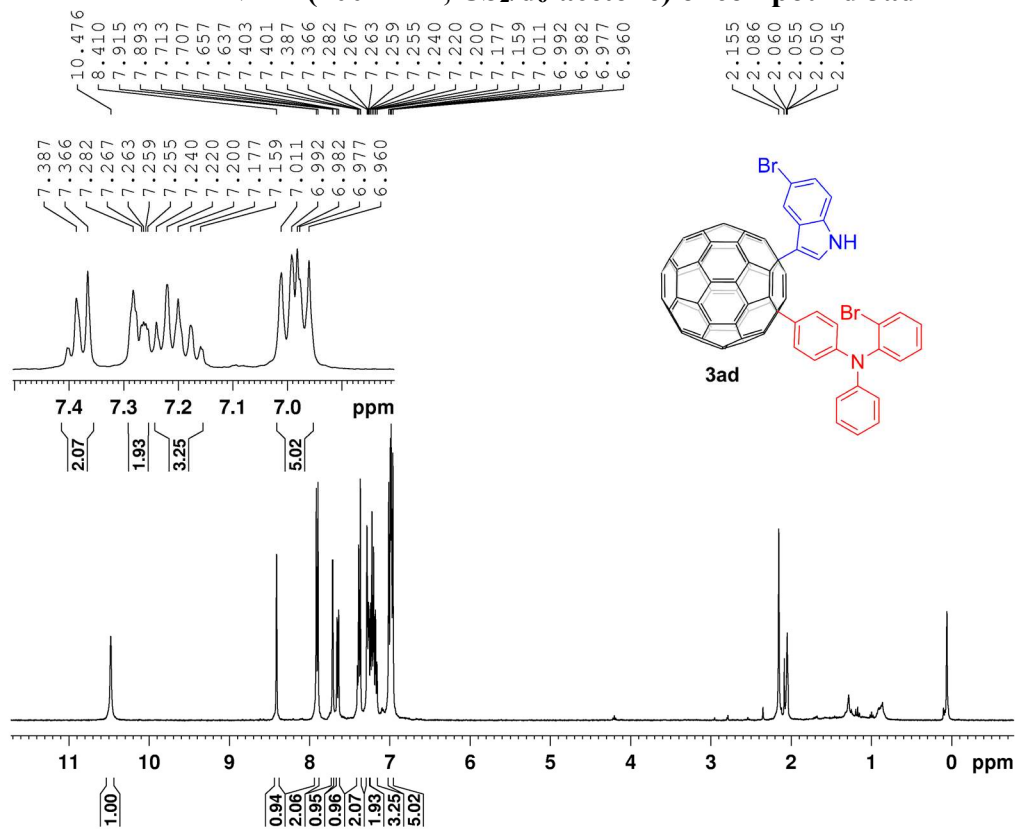

```

NAME      Dec21-2020
EXPNO    1
PROCNO   1
Date_    20201221
Time     20.03
INSTRUM  spect
PROBHD   5 mm PABBO BB
PULPROG  zg30
TD        65536
SOLVENT  Acetone
NS        16
DS        2
SWH       8223.685 Hz
FIDRES    0.125483 Hz
AQ        3.9846387 sec
RG        362
DW        60.800 usec
DE        6.50 usec
TE        300.0 K
D1        1.00000000 sec
TDO       1
===== CHANNEL f1 =====
NUC1     1H
P1       13.50 usec
PL1     -2.00 dB
PL1W    13.45602226 W
SF01    400.1324710 MHz
SI       32768
SF       400.1300077 MHz
WDW      EM
SSB      0
LB       0.30 Hz
GB       0
PC       1.00
  
```

<sup>13</sup>C NMR (100 MHz, CS<sub>2</sub>/d<sub>6</sub>-acetone) of compound 3ad

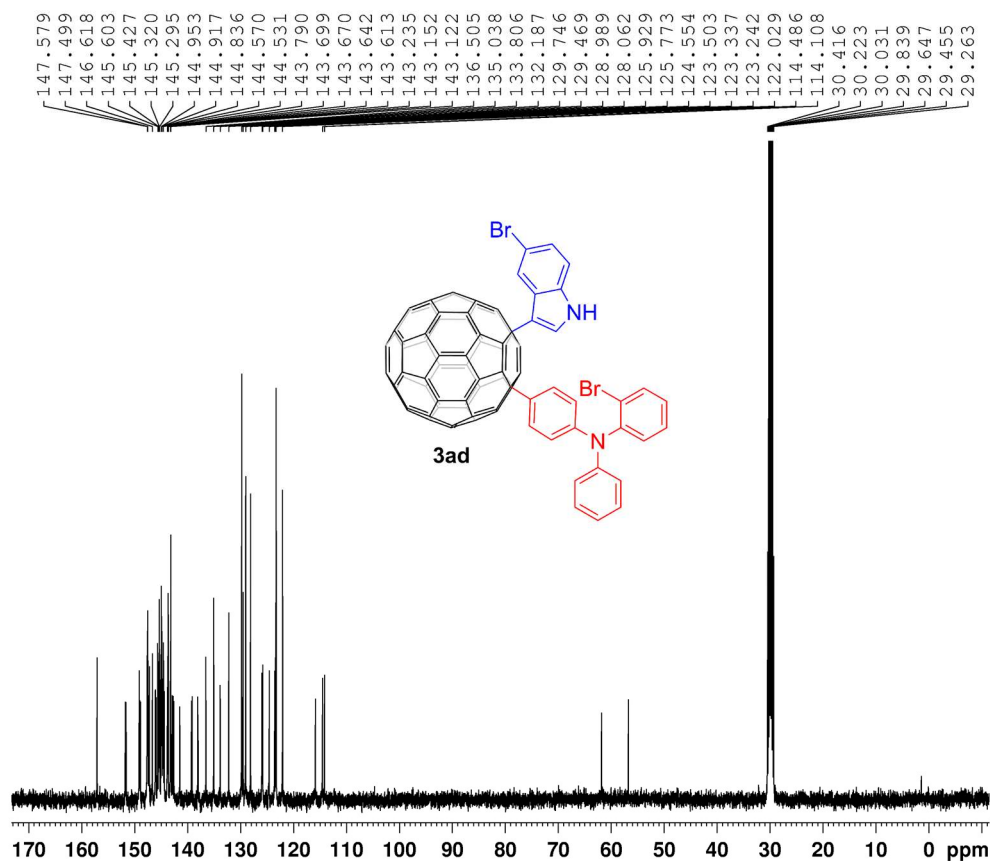

```

NAME      Dec21-2020
EXPNO    2
PROCNO   1
Date_    20201221
Time     20.14
INSTRUM  spect
PROBHD   5 mm PABBO BB
PULPROG  zgpg30
TD        65536
SOLVENT  Acetone
NS        14671
DS        4
SWH       24038.461 Hz
FIDRES    0.366798 Hz
AQ        1.3631988 sec
RG        57
DW        20.800 usec
DE        6.50 usec
TE        300.0 K
D1        2.00000000 sec
D11       0.03000000 sec
TDO       1
===== CHANNEL f1 =====
NUC1     13C
P1       9.30 usec
PL1     -2.00 dB
PL1W    54.14257431 W
SF01    100.6228298 MHz
===== CHANNEL f2 =====
CPDPRG2  waltz16
NUC2     1H
PCPD2    80.00 usec
PL2     -2.00 dB
PL12    13.46 dB
PL13    120.00 dB
PL2W    13.45602226 W
PL12W   0.38275132 W
PL13W   0.00000000 W
SF02    400.1316005 MHz
SI       32768
SF       100.6127362 MHz
WDW      EM
SSB      0
LB       1.00 Hz
GB       0
PC       1.40
  
```

### Expanded <sup>13</sup>C NMR (100 MHz, CS<sub>2</sub>/d<sub>6</sub>-acetone) of compound 3ad

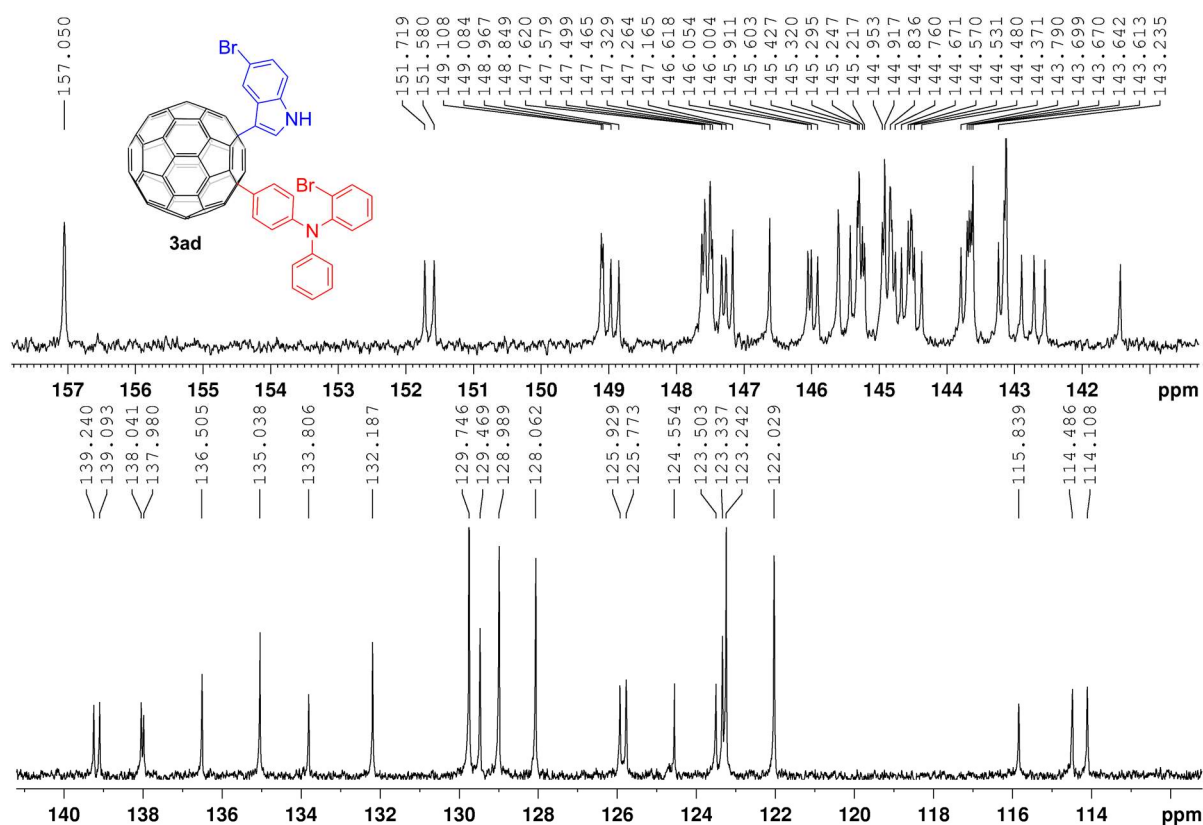

### <sup>1</sup>H NMR (400 MHz, CS<sub>2</sub>/d<sub>6</sub>-acetone) of compound 3fd

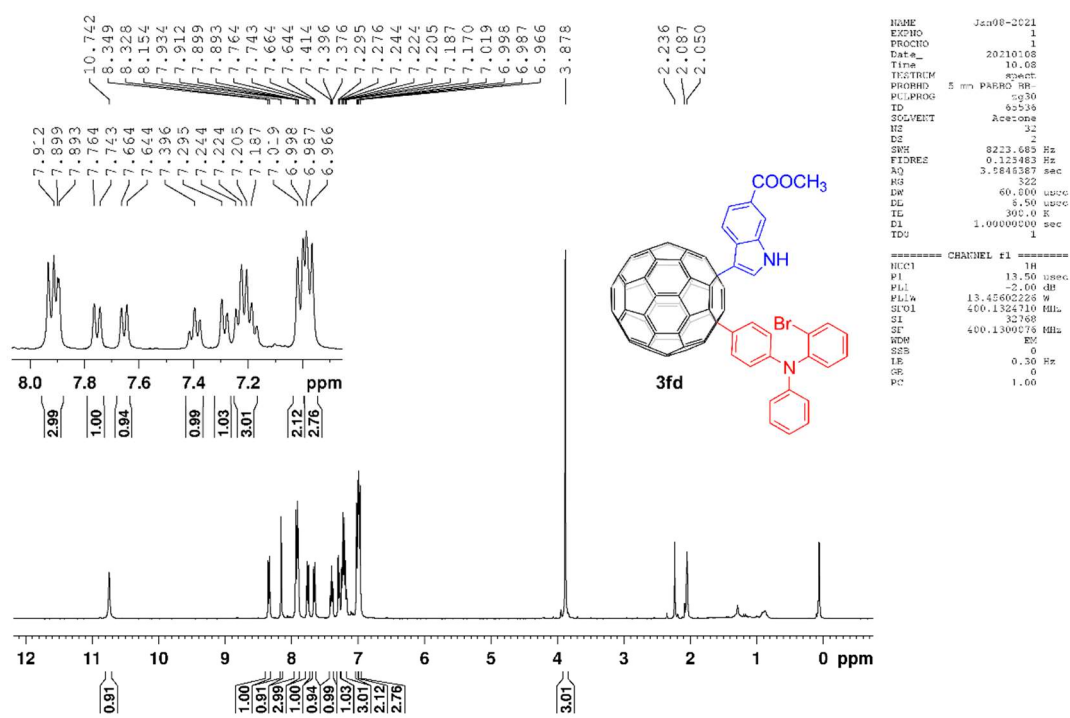

### <sup>13</sup>C NMR (100 MHz, CS<sub>2</sub>/d<sub>6</sub>-acetone) of compound 3fd

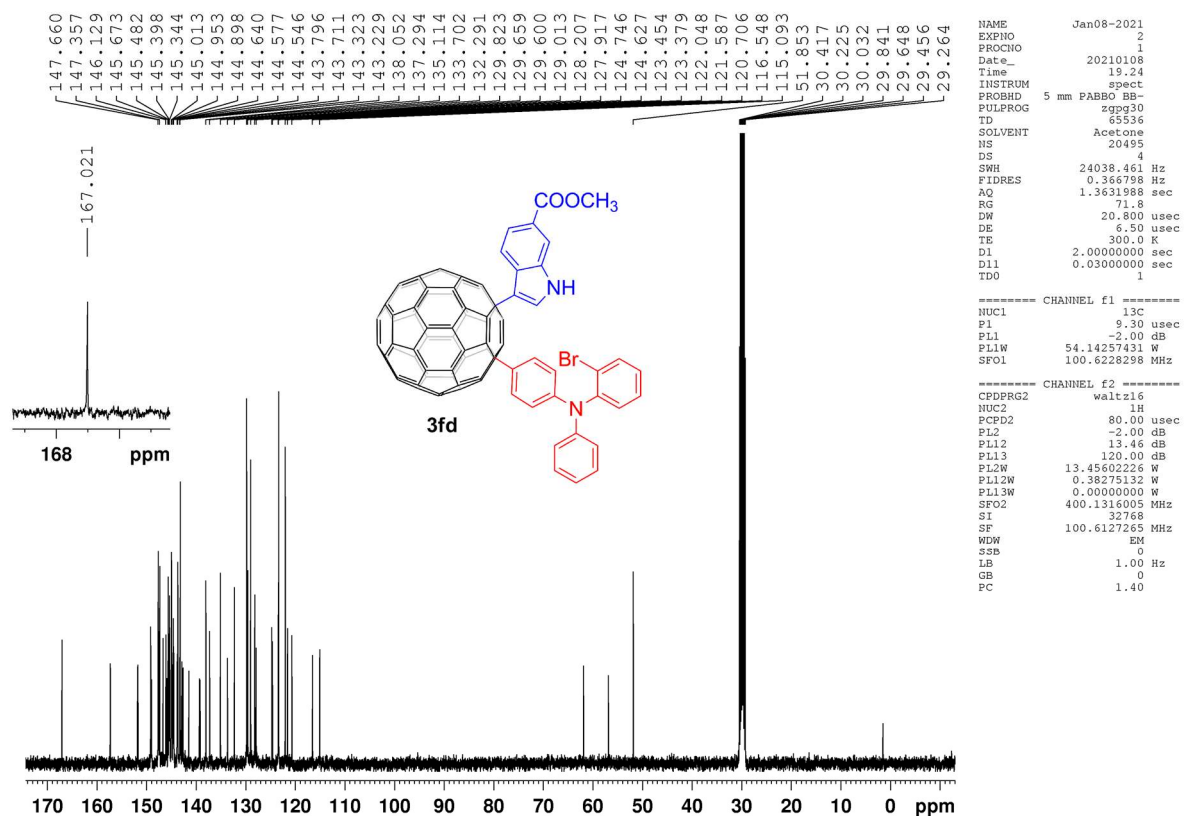

### Expanded <sup>13</sup>C NMR (100 MHz, CS<sub>2</sub>/d<sub>6</sub>-acetone) of compound 3fd

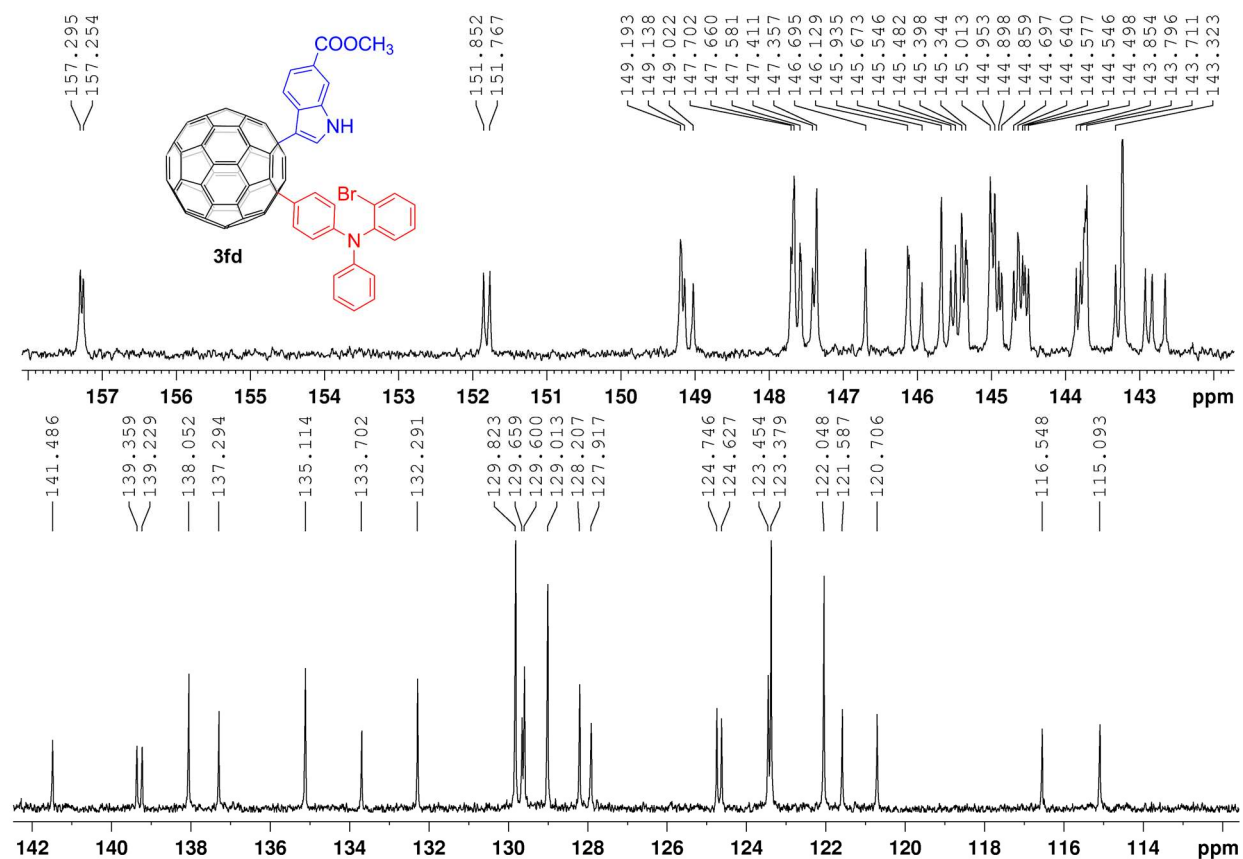

### <sup>1</sup>H NMR (400 MHz, CS<sub>2</sub>/d<sub>6</sub>-acetone) of compound 3ae

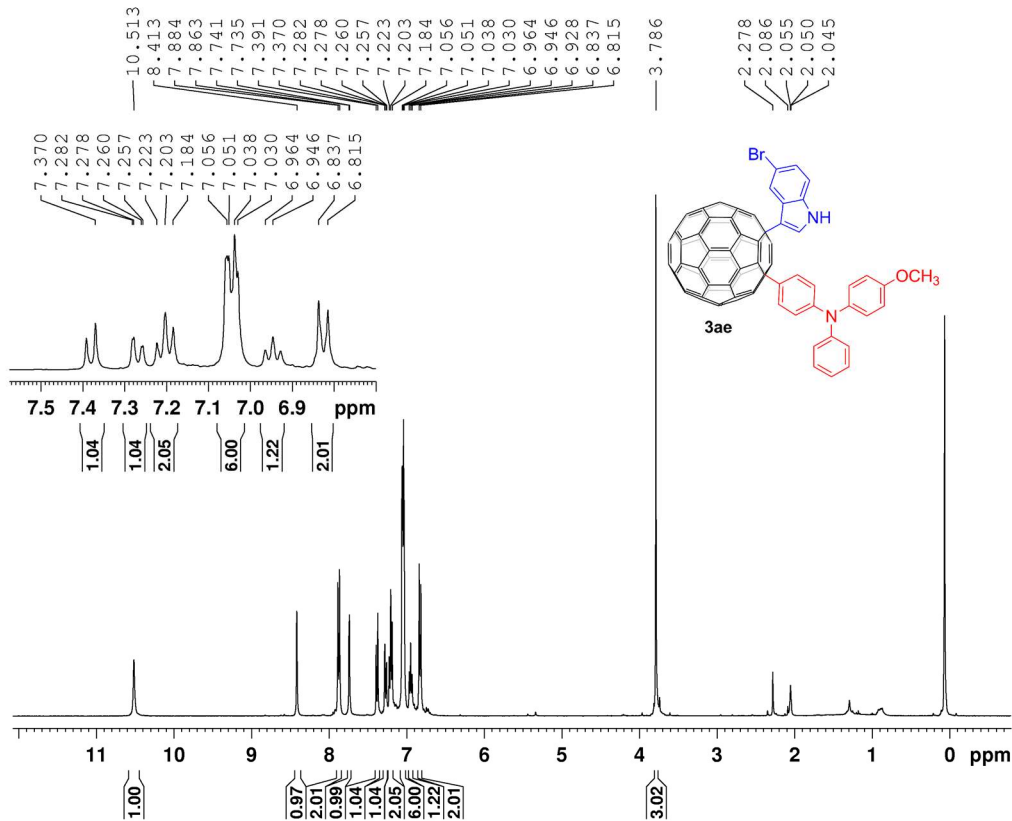

```

NAME      Dec31-2020
EXPNO    2
PROCNO   1
Date_    20201231
Time     10.53
INSTRUM  spect
PROBHD   5 mm PABBO BB-
PULPROG  zg30
TD        65536
SOLVENT  Acetone
NS        16
DS        2
SWH       8223.685 Hz
FIDRES    0.125483 Hz
AQ         3.9846387 sec
RG         256
DW         60.800 usec
DE         6.50 usec
TE         300.0 K
D1         1.00000000 sec
TDO        1
===== CHANNEL f1 =====
NUC1      1H
P1        13.50 usec
PL1       -2.00 dB
PL1W      13.45602226 W
SFO1      400.1324710 MHz
SI         32768
SF         400.1300078 MHz
WDW        EM
SSB         0
LB         0.30 Hz
GB         0
PC         1.00
    
```

### <sup>13</sup>C NMR (100 MHz, CS<sub>2</sub>/d<sub>6</sub>-acetone) of compound 3ae

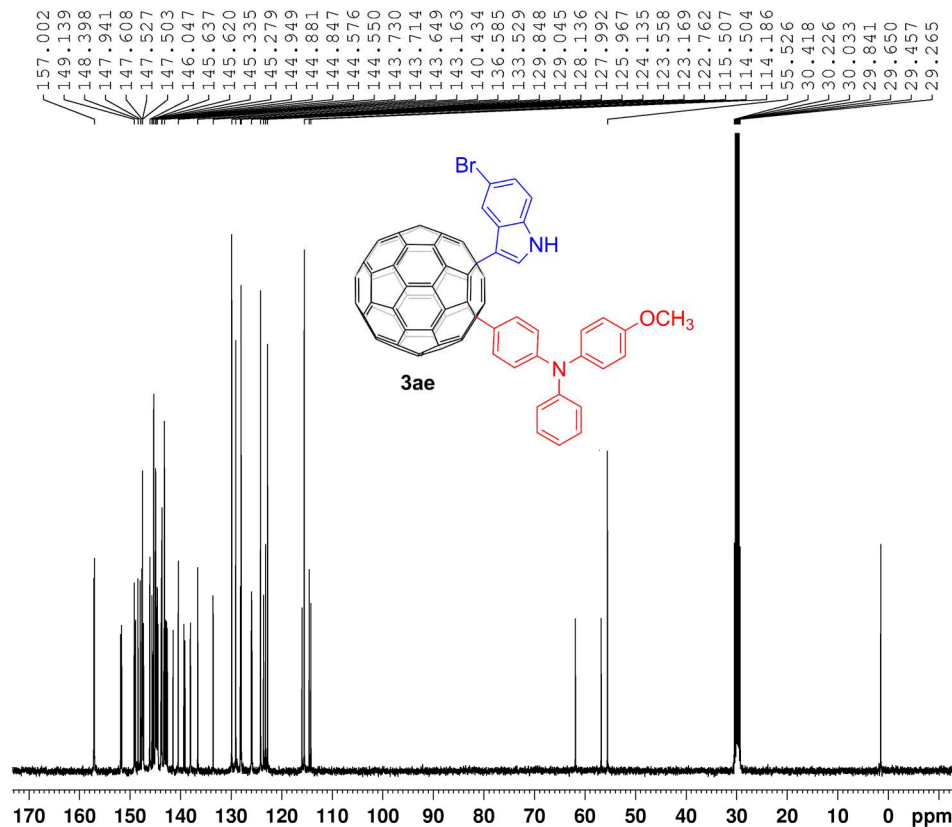

```

NAME      Dec31-2020
EXPNO    3
PROCNO   1
Date_    20201231
Time     17.36
INSTRUM  spect
PROBHD   5 mm PABBO BB-
PULPROG  zgpg30
TD        65536
SOLVENT  Acetone
NS        20480
DS        4
SWH       24038.461 Hz
FIDRES    0.366798 Hz
AQ         1.3631988 sec
RG         64
DW         20.800 usec
DE         6.50 usec
TE         300.0 K
D1         2.00000000 sec
D11        0.03000000 sec
TDO        1
===== CHANNEL f1 =====
NUC1      13C
P1         9.30 usec
PL1       -2.00 dB
PL1W      54.14257431 W
SFO1      100.6228298 MHz
===== CHANNEL f2 =====
CPDPRG2   waltz16
NUC2      1H
PCPD2     80.00 usec
PL2       -2.00 dB
PL12      13.46 dB
PL13      120.00 dB
PL2W      13.45602226 W
PL12W     0.38275132 W
PL13W     0.00000000 W
SFO2      400.1316005 MHz
SI         32768
SF         100.6127295 MHz
WDW        EM
SSB         0
LB         1.00 Hz
GB         0
PC         1.40
    
```

### Expanded <sup>13</sup>C NMR (100 MHz, CS<sub>2</sub>/d<sub>6</sub>-acetone) of compound 3ae

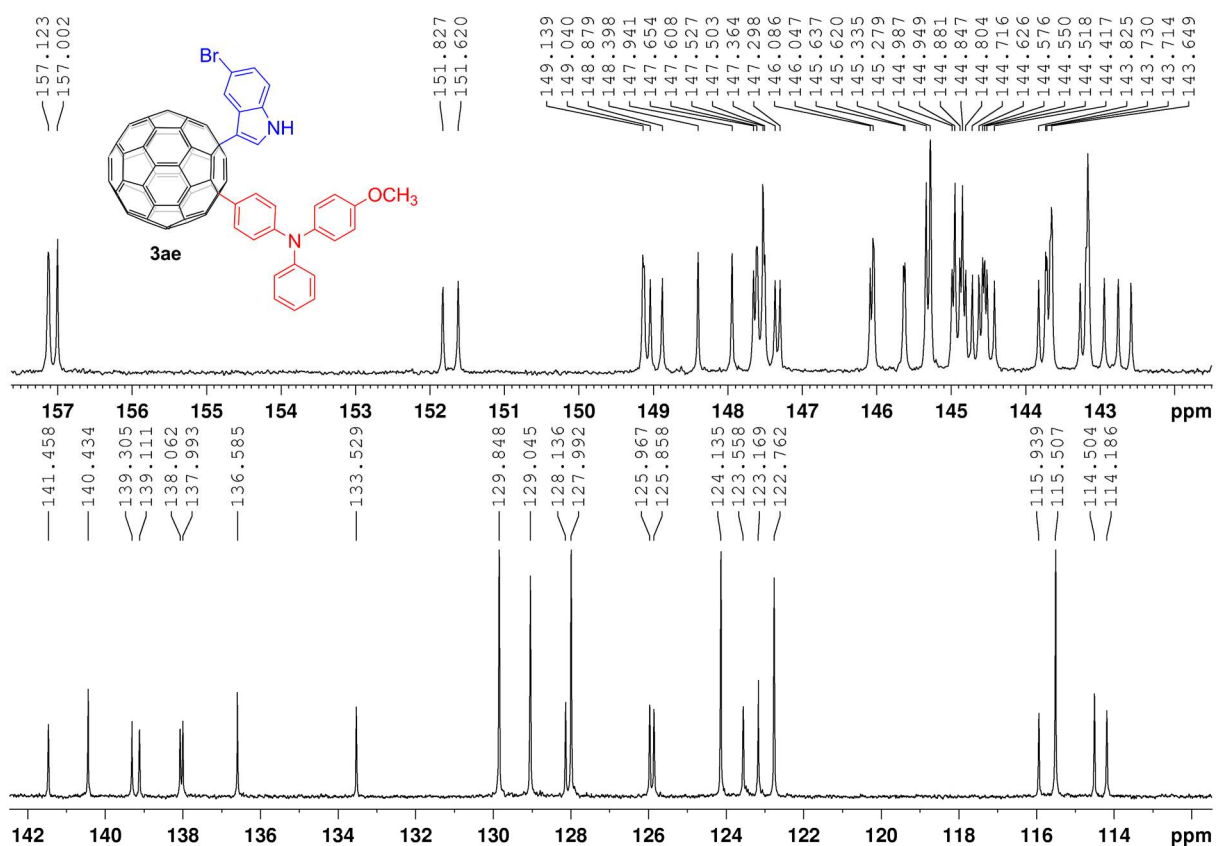

### <sup>1</sup>H NMR (400 MHz, CS<sub>2</sub>/d<sub>6</sub>-acetone) of compound 3fe

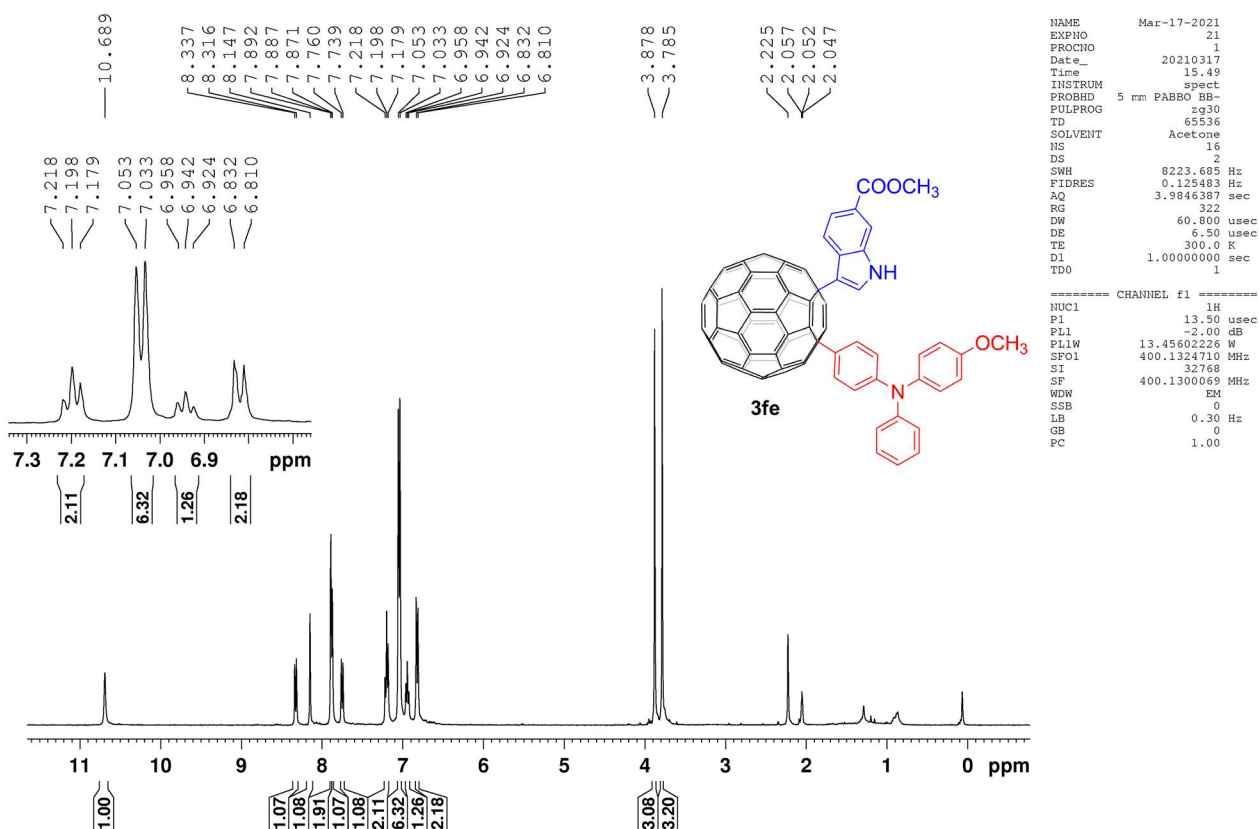

### <sup>13</sup>C NMR (100 MHz, CS<sub>2</sub>/d<sub>6</sub>-acetone) of compound 3fe

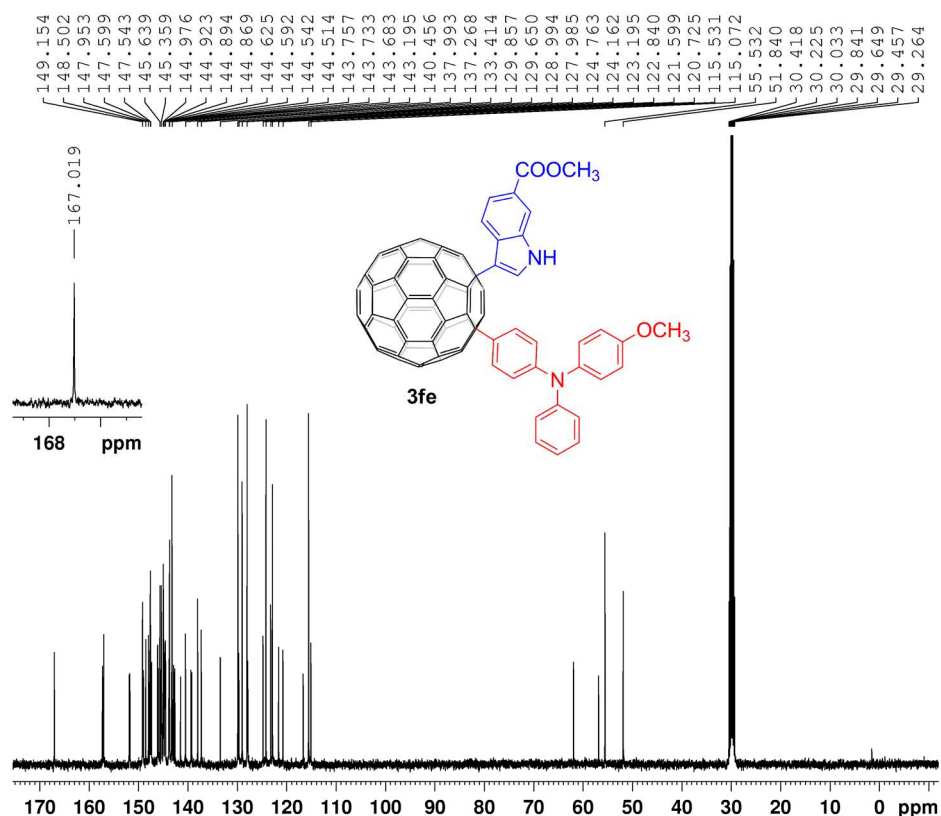

```

NAME      Mar-17-2021
EXPNO    22
PROCNO   1
Date_    20210317
Time     16.02
INSTRUM  spect
PROBHD   5 mm PABBO BB-
PULPROG  zgpg30
TD        65536
SOLVENT  Acetone
NS        17846
DS        4
SWH       24038.461 Hz
FIDRES    0.366798 Hz
AQ         1.3631988 sec
RG         80.6
DW         20.800 usec
DE         6.50 usec
TE         300.0 K
D1         2.00000000 sec
D11        0.03000000 sec
TDO        1

----- CHANNEL f1 -----
NUC1      13C
P1         9.30 usec
PL1        -2.00 dB
PL1W       54.14257431 W
SF01      100.6228298 MHz

----- CHANNEL f2 -----
CPDPRG2   waltz16
NUC2       1H
PCPD2      80.00 usec
PL2         -2.00 dB
PL12       13.46 dB
PL13       120.00 dB
PL2W       13.45602226 W
PL12W      0.38275132 W
PL13W      0.00000000 W
SF02      400.1316005 MHz
SI         32768
SF         100.6127277 MHz
WPM        kW
SSB         0
LB          1.00 Hz
GB          0
FC          1.40
    
```

### Expanded <sup>13</sup>C NMR (100 MHz, CS<sub>2</sub>/d<sub>6</sub>-acetone) of compound 3fe

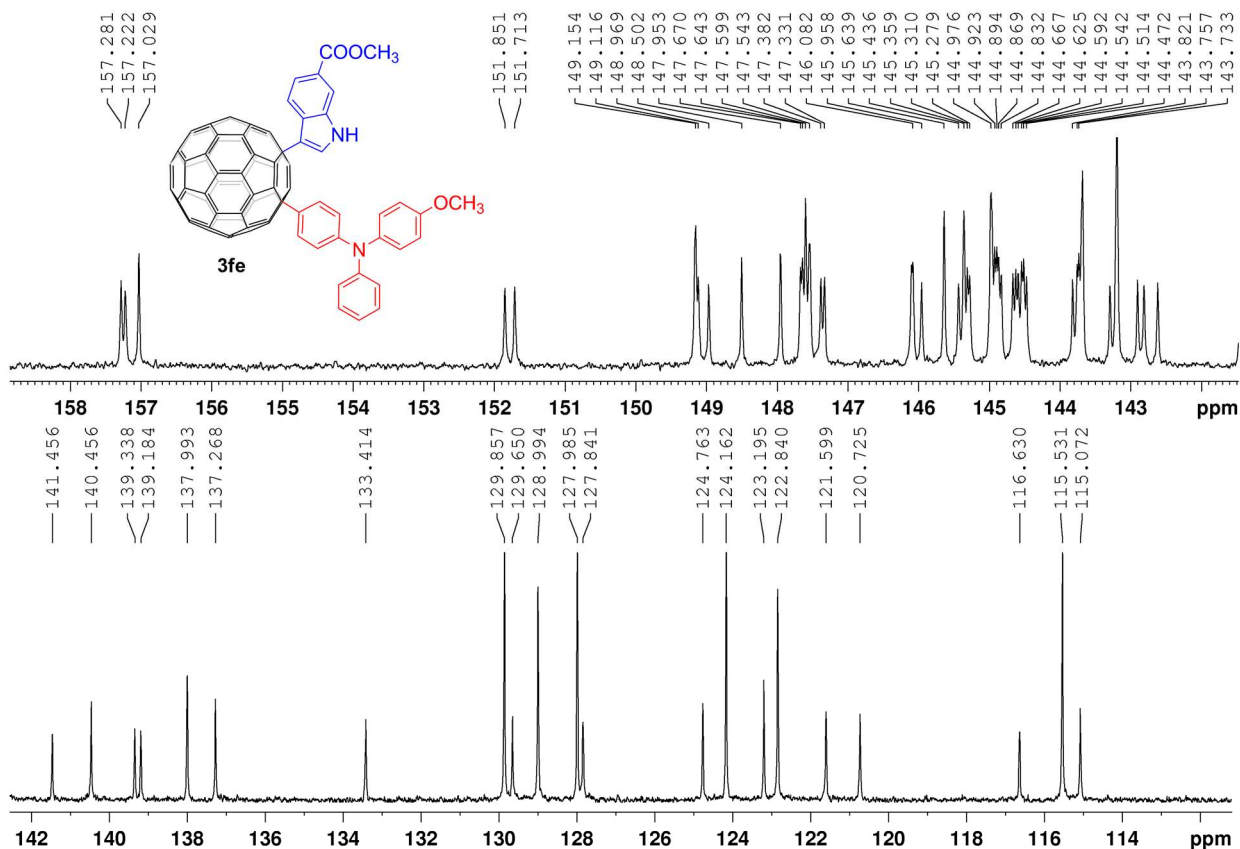

### <sup>1</sup>H NMR (400 MHz, CS<sub>2</sub>/d<sub>6</sub>-DMSO) of compound 3af

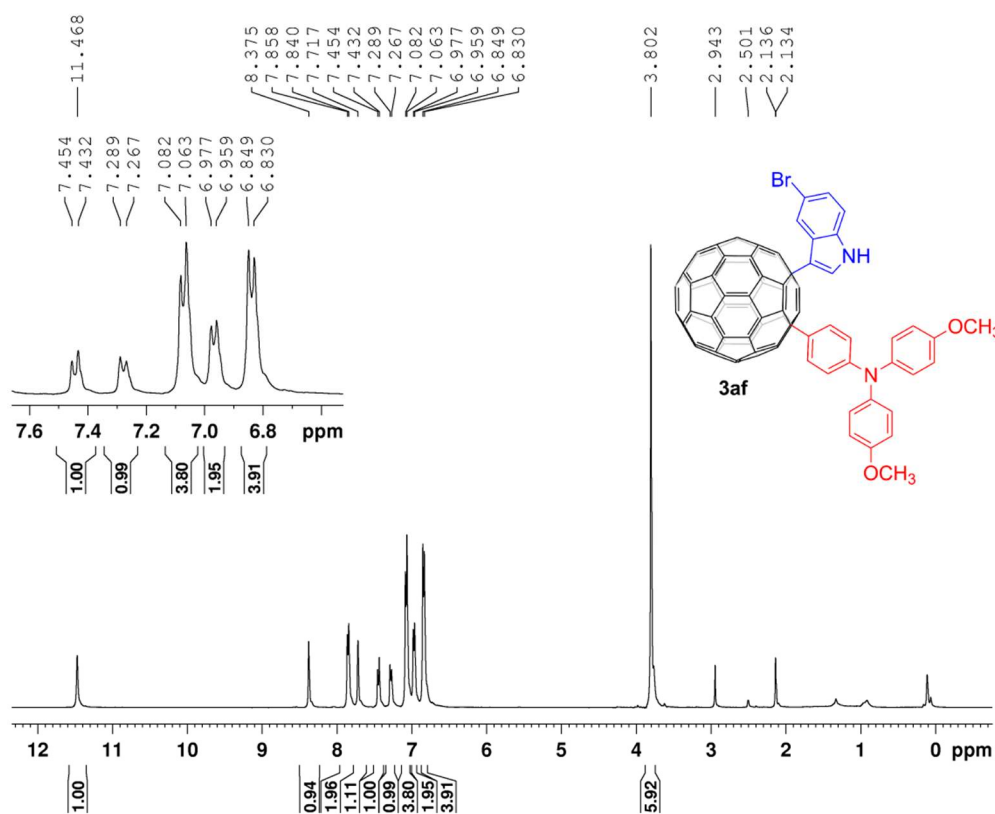

```

NAME      Dec22-2020
EXPNO    3
PROCNO   1
Date_    20201222
Time     11.23
INSTRUM  spect
PROBHD   5 mm PABBO BB-
PULPROG  zg30
TD        65536
SOLVENT  DMSO
NS        16
DS        2
SWH       8223.685 Hz
FIDRES    0.125483 Hz
AQ        3.9846387 sec
RG        228
DW        60.800 usec
DE        6.50 usec
TE        300.0 K
D1        1.00000000 sec
D11       1
TD0       1
    
```

```

----- CHANNEL f1 -----
NUC1      1H
P1        13.50 usec
PL1       -2.00 dB
PL1W      13.45602226 W
SFO1      400.1324710 MHz
SI        32768
SF        400.1300034 MHz
WDW       EM
SSB       0
LB        0.30 Hz
GB        0
PC        1.00
    
```

### <sup>13</sup>C NMR (100 MHz, CS<sub>2</sub>/d<sub>6</sub>-DMSO) of compound 3af

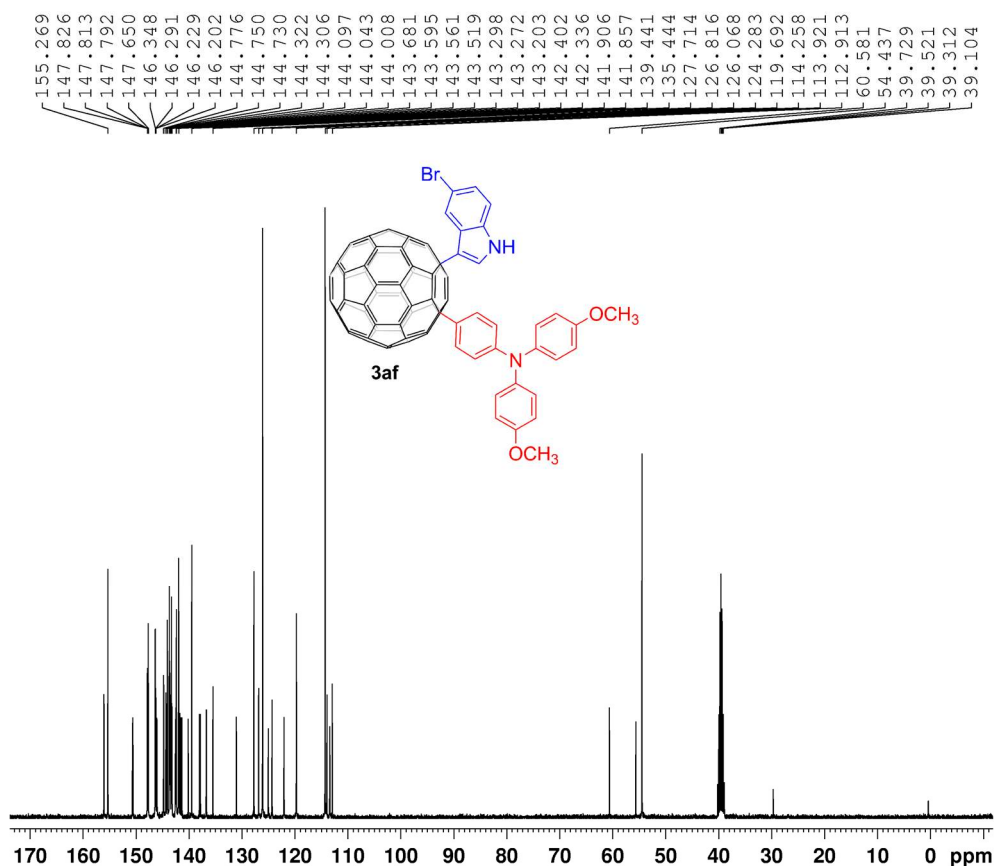

```

NAME      Dec22-2020
EXPNO    4
PROCNO   1
Date_    20201222
Time     18.47
INSTRUM  spect
PROBHD   5 mm PABBO BB-
PULPROG  zgpg30
TD        65536
SOLVENT  DMSO
NS        16094
DS        4
SWH       24038.461 Hz
FIDRES    0.366798 Hz
AQ        1.3631988 sec
RG        80.6
DW        20.800 usec
DE        6.50 usec
TE        300.0 K
D1        2.00000000 sec
D11       0.03000000 sec
TD0       1
    
```

```

----- CHANNEL f1 -----
NUC1      13C
P1        9.30 usec
PL1       -2.00 dB
PL1W      54.14257431 W
SFO1      100.6228298 MHz
    
```

```

----- CHANNEL f2 -----
CPDPRG2  waltz16
NUC2      1H
PCPD2     80.00 usec
PL2       -2.00 dB
PL12      13.46 dB
PL13      120.00 dB
PL2W      13.45602226 W
PL12W     0.38275132 W
PL13W     0.00000000 W
SFO2      400.1316005 MHz
SI        32768
SF        100.6128617 MHz
WDW       EM
SSB       0
LB        1.00 Hz
GB        0
PC        1.40
    
```

### Expanded <sup>13</sup>C NMR (100 MHz, CS<sub>2</sub>/d<sub>6</sub>-DMSO) of compound 3af

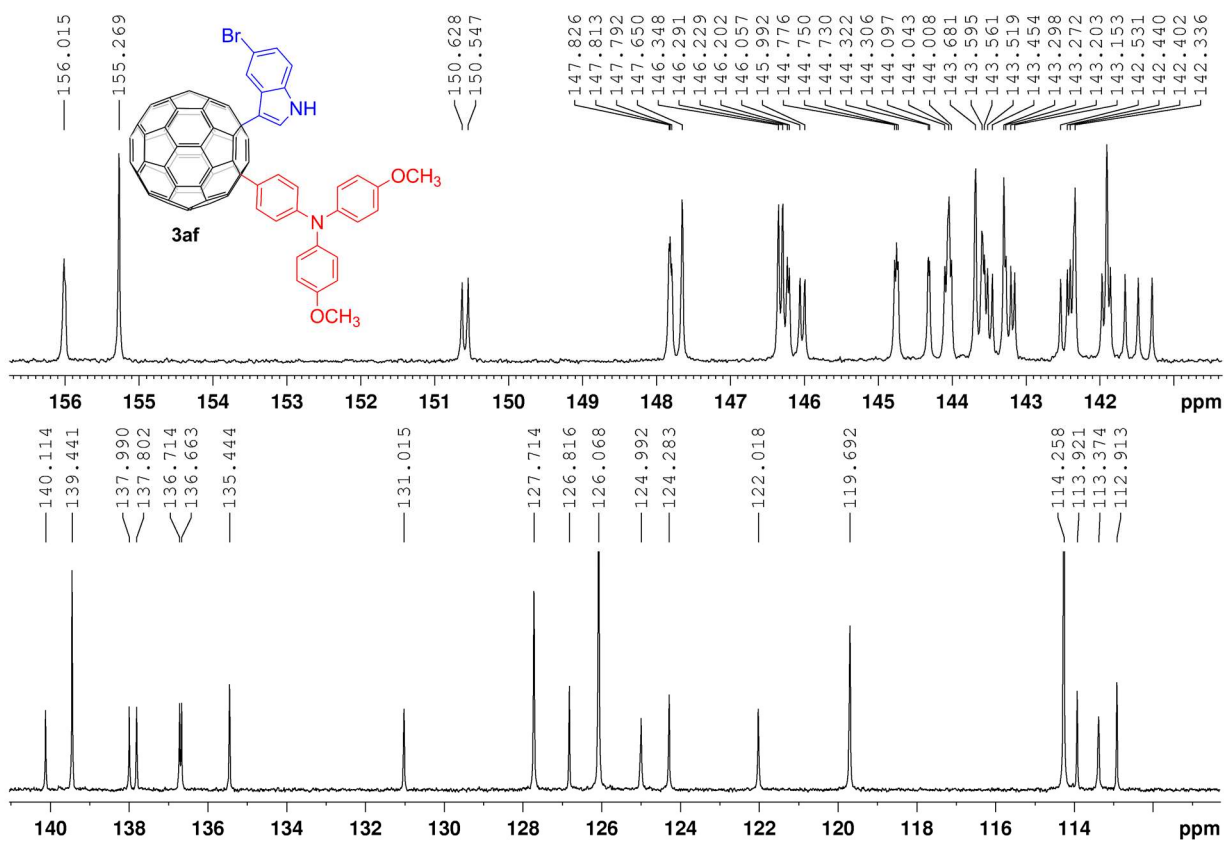

### <sup>1</sup>H NMR (400 MHz, CS<sub>2</sub>/d<sub>6</sub>-acetone) of compound 3ff

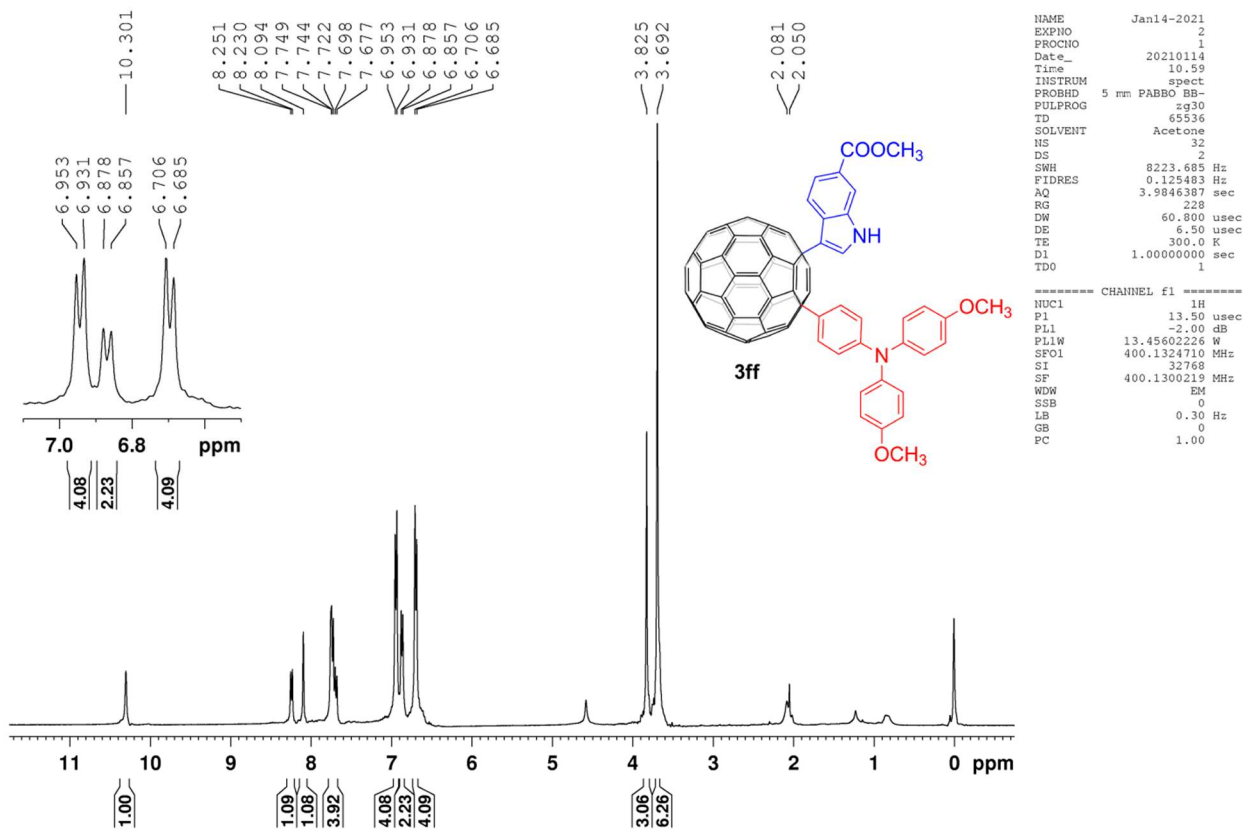



### <sup>13</sup>C NMR (100 MHz, CS<sub>2</sub>/d<sub>6</sub>-acetone) of compound 3ff

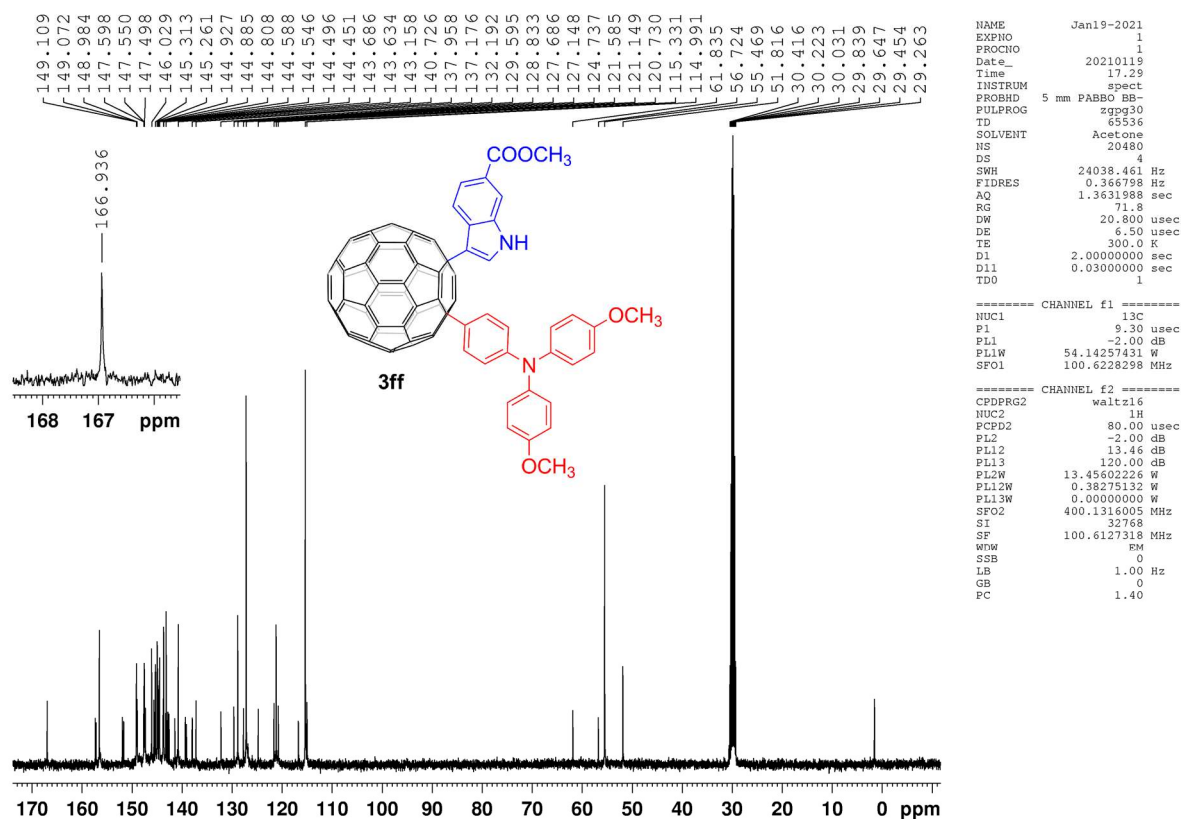

### Expanded <sup>13</sup>C NMR (100 MHz, CS<sub>2</sub>/d<sub>6</sub>-acetone) of compound 3ff

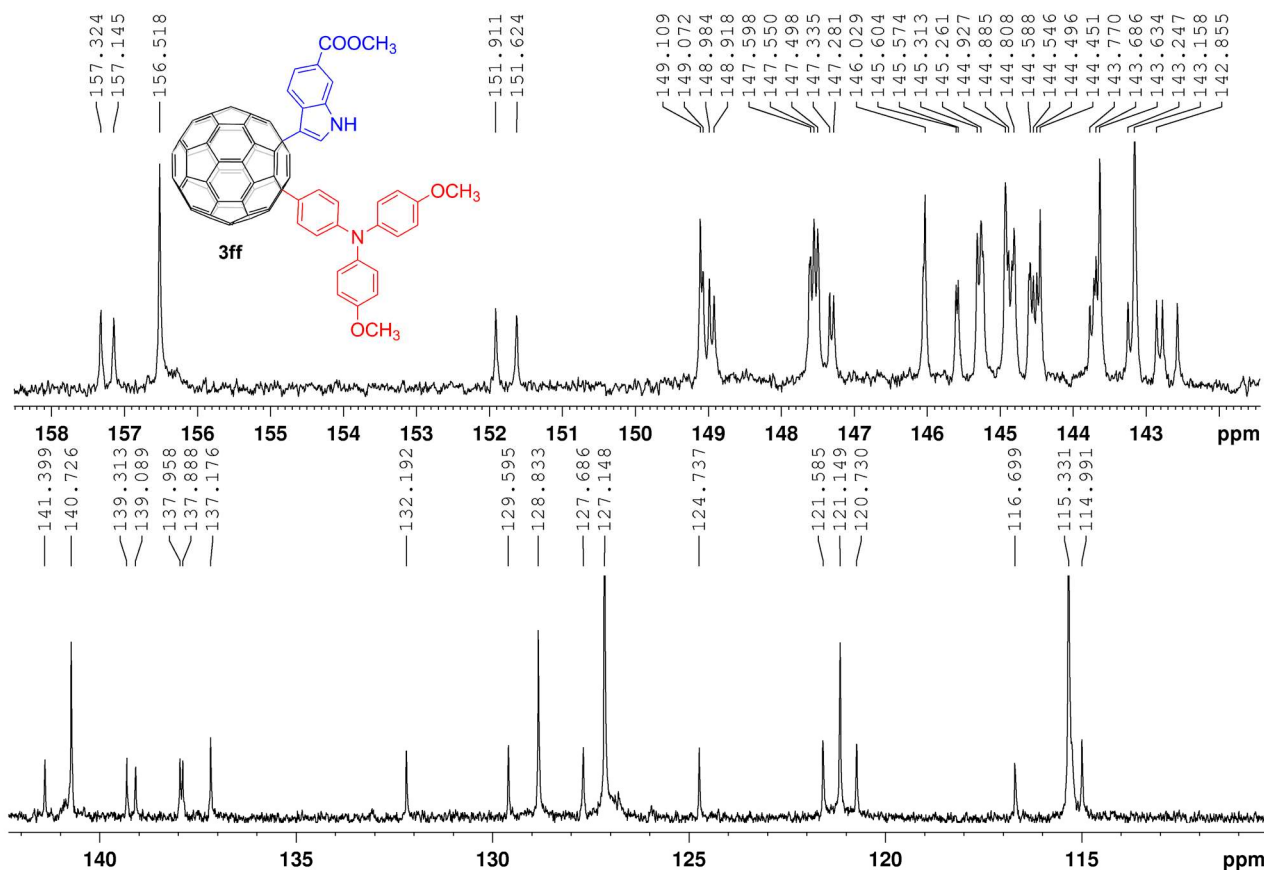

### <sup>1</sup>H NMR (400 MHz, CS<sub>2</sub>/d<sub>6</sub>-acetone) of compound 3ag

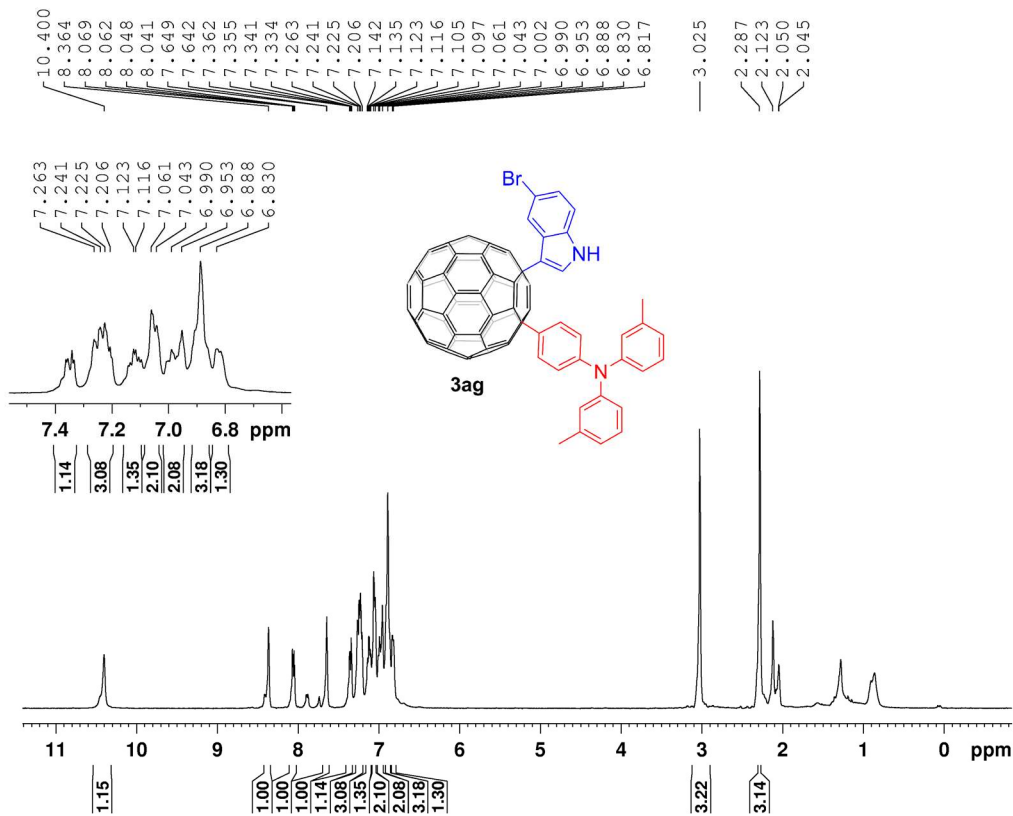

```

NAME      Apr19-2021
EXPNO    1
PROCNO   1
Date_    20210419
Time     11.06
INSTRUM  spect
PROBHD   5 mm PABBO BB-
PULPROG  zg30
TD        65536
SOLVENT  Acetone
NS        16
DS        2
SWH       8223.685 Hz
FIDRES    0.125483 Hz
AQ        3.9846387 sec
RG        287
DW        60.800 usec
DE        6.50 usec
TE        300.0 K
D1        1.0000000 sec
D11       1
TD0       1

===== CHANNEL f1 =====
NUC1      1H
P1        13.50 usec
PL1       -2.00 dB
PL1W      13.45602226 W
SFO1      400.1324710 MHz
SI        32768
SF        400.1300078 MHz
WDW       EM
SSB       0
LB        1.00 Hz
GB        0
PC        1.00
    
```

### <sup>13</sup>C NMR (100 MHz, CS<sub>2</sub>/d<sub>6</sub>-acetone) of compound 3ag

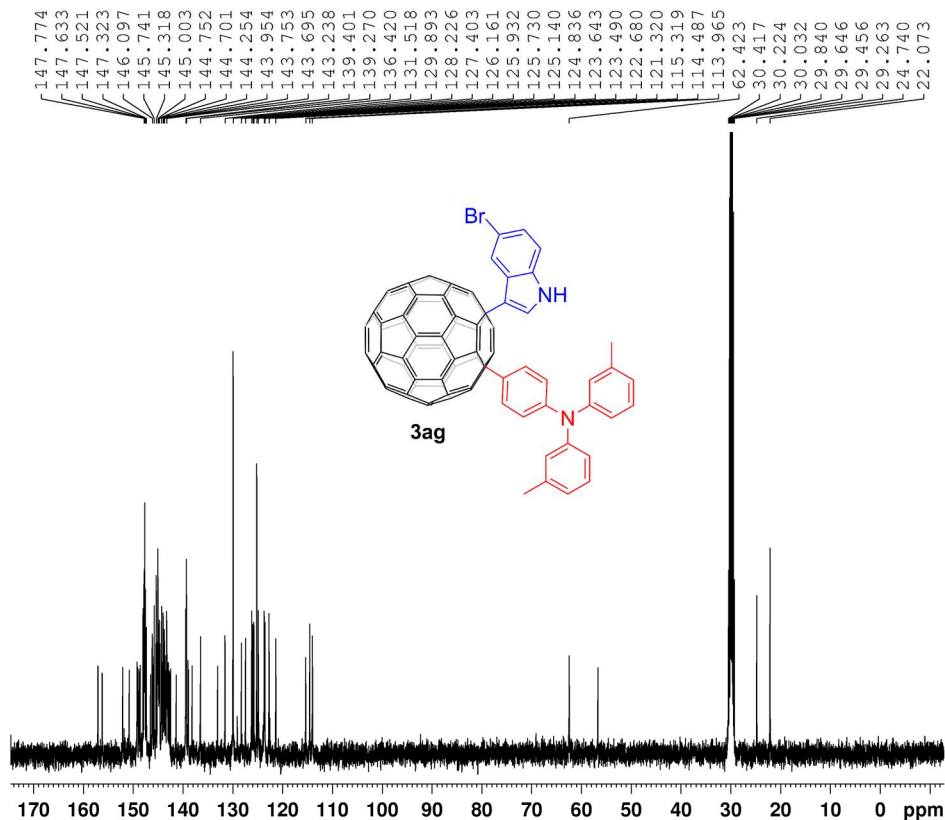

```

NAME      Apr19-2021
EXPNO    2
PROCNO   1
Date_    20210419
Time     17.26
INSTRUM  spect
PROBHD   5 mm PABBO BB-
PULPROG  zgpg30
TD        65536
SOLVENT  Acetone
NS        10240
DS        4
SWH       24038.461 Hz
FIDRES    0.366798 Hz
AQ        1.3631988 sec
RG        80.6
DW        20.800 usec
DE        6.50 usec
TE        300.0 K
D1        2.0000000 sec
D11       0.0300000 sec
TD0       1

===== CHANNEL f1 =====
NUC1      13C
P1        9.30 usec
PL1       -2.00 dB
PL1W      54.14257431 W
SFO1      100.6228298 MHz

===== CHANNEL f2 =====
CPDPRG2   waltz16
NUC2      1H
PCPD2     80.00 usec
PL2       -2.00 dB
PL12      13.46 dB
PL13      120.00 dB
PL2W      13.45602226 W
PL12W     0.38275132 W
PL13W     0.00000000 W
SFO2      400.1316005 MHz
SI        32768
SF        100.6127296 MHz
WDW       EM
SSB       0
LB        1.00 Hz
GB        0
PC        1.40
    
```

### Expanded <sup>13</sup>C NMR (100 MHz, CS<sub>2</sub>/d<sub>6</sub>-acetone) of compound 3ag

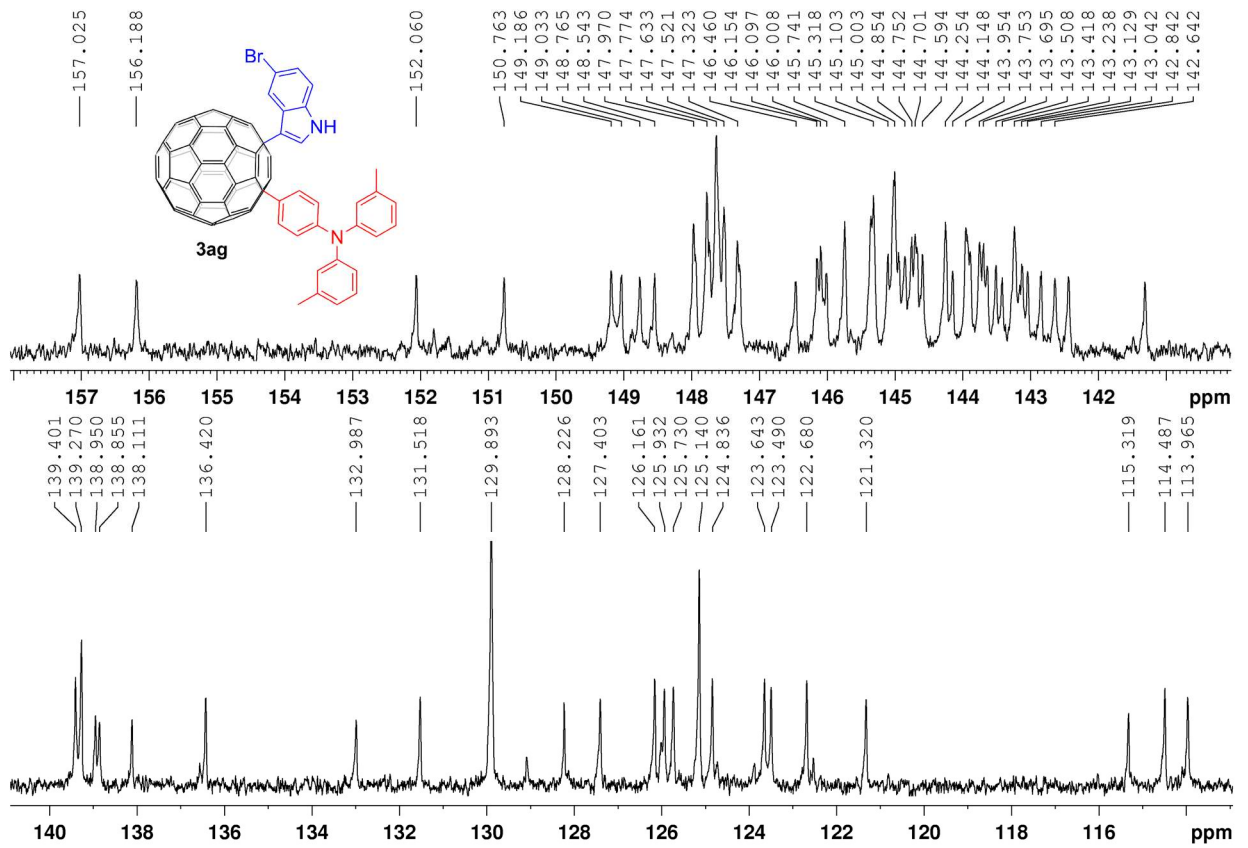

### <sup>1</sup>H NMR (400 MHz, CS<sub>2</sub>/d<sub>6</sub>-acetone) of compound 3fg

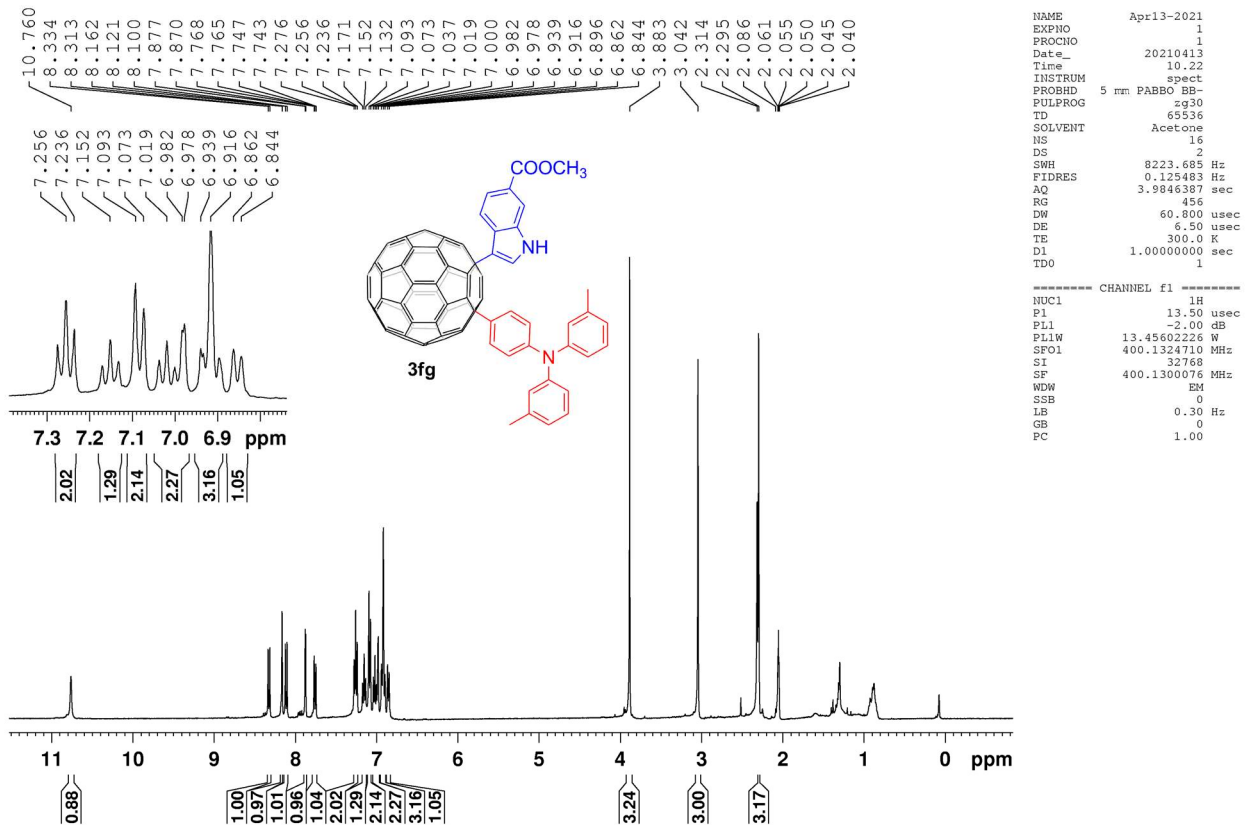

### <sup>13</sup>C NMR (100 MHz, CS<sub>2</sub>/d<sub>6</sub>-acetone) of compound 3fg

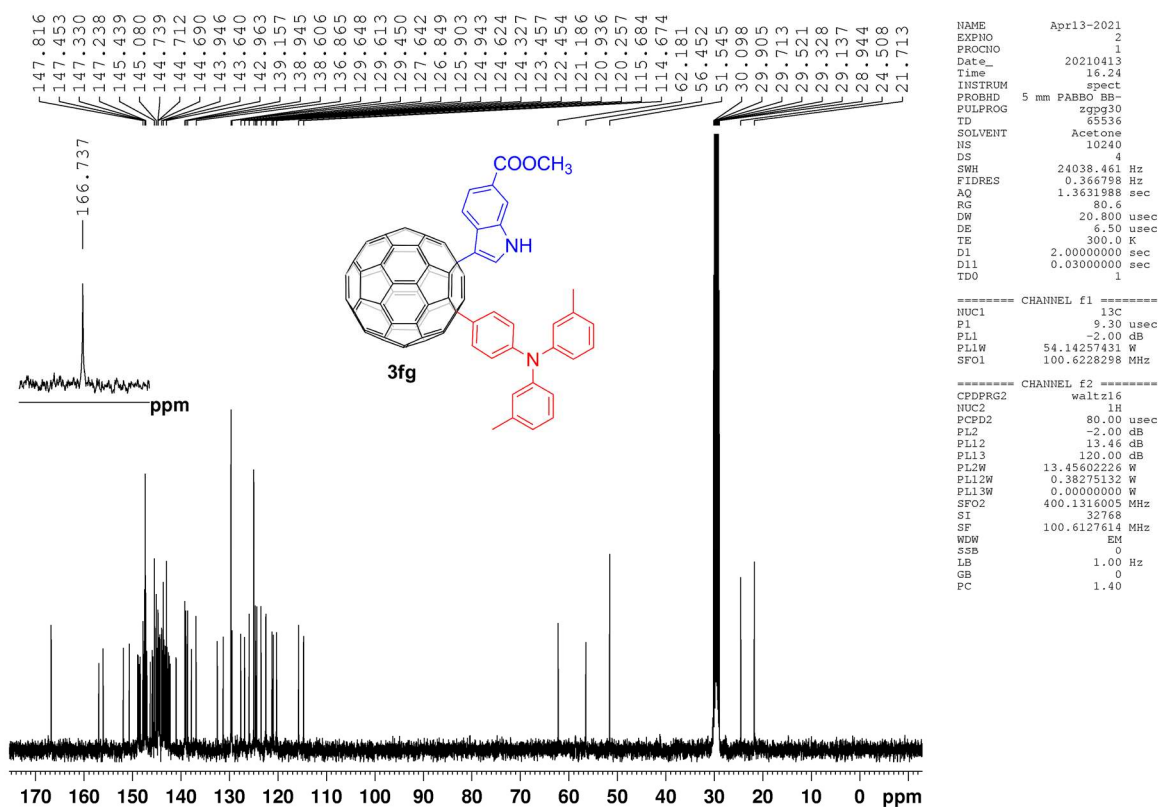

### Expanded <sup>13</sup>C NMR (100 MHz, CS<sub>2</sub>/d<sub>6</sub>-acetone) of compound 3fg

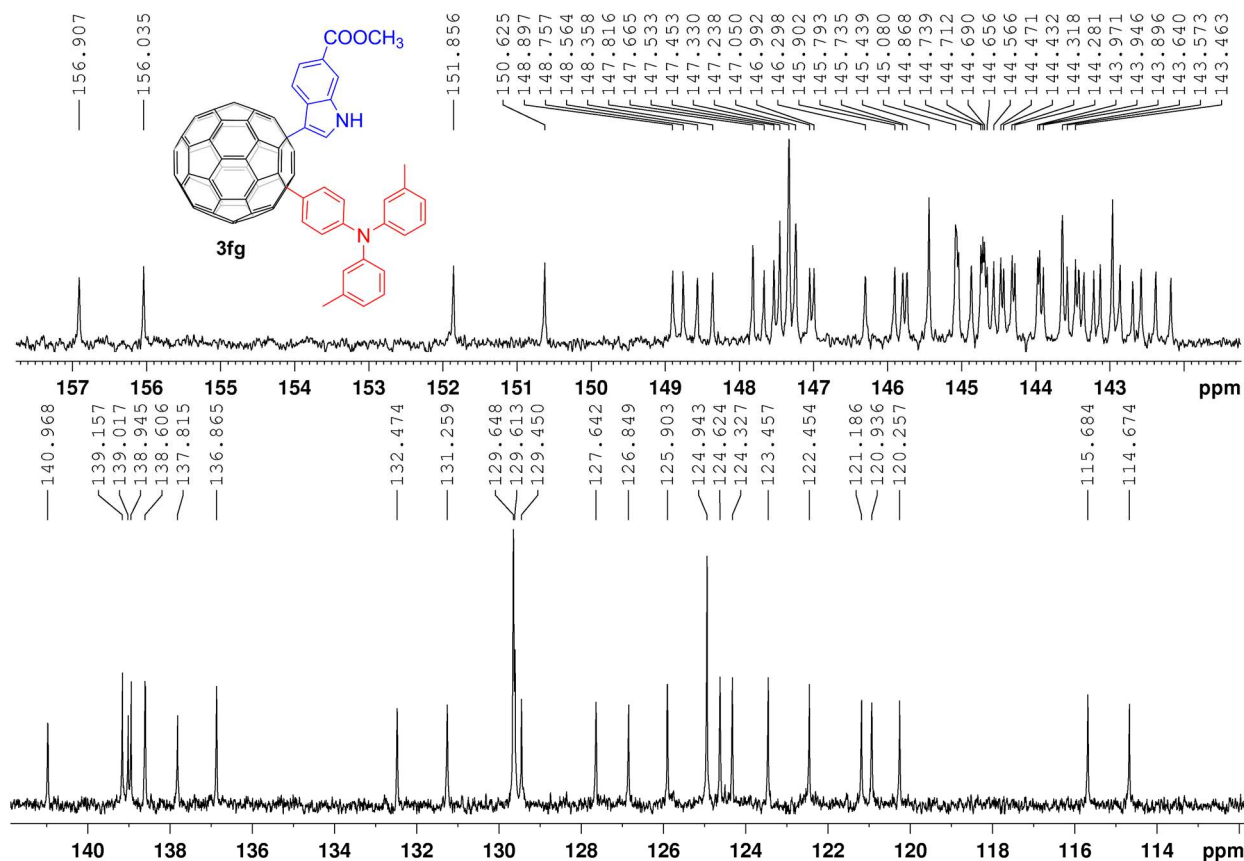

# <sup>1</sup>H NMR (400 MHz, CS<sub>2</sub>/d<sub>6</sub>-acetone) of compound 3ah

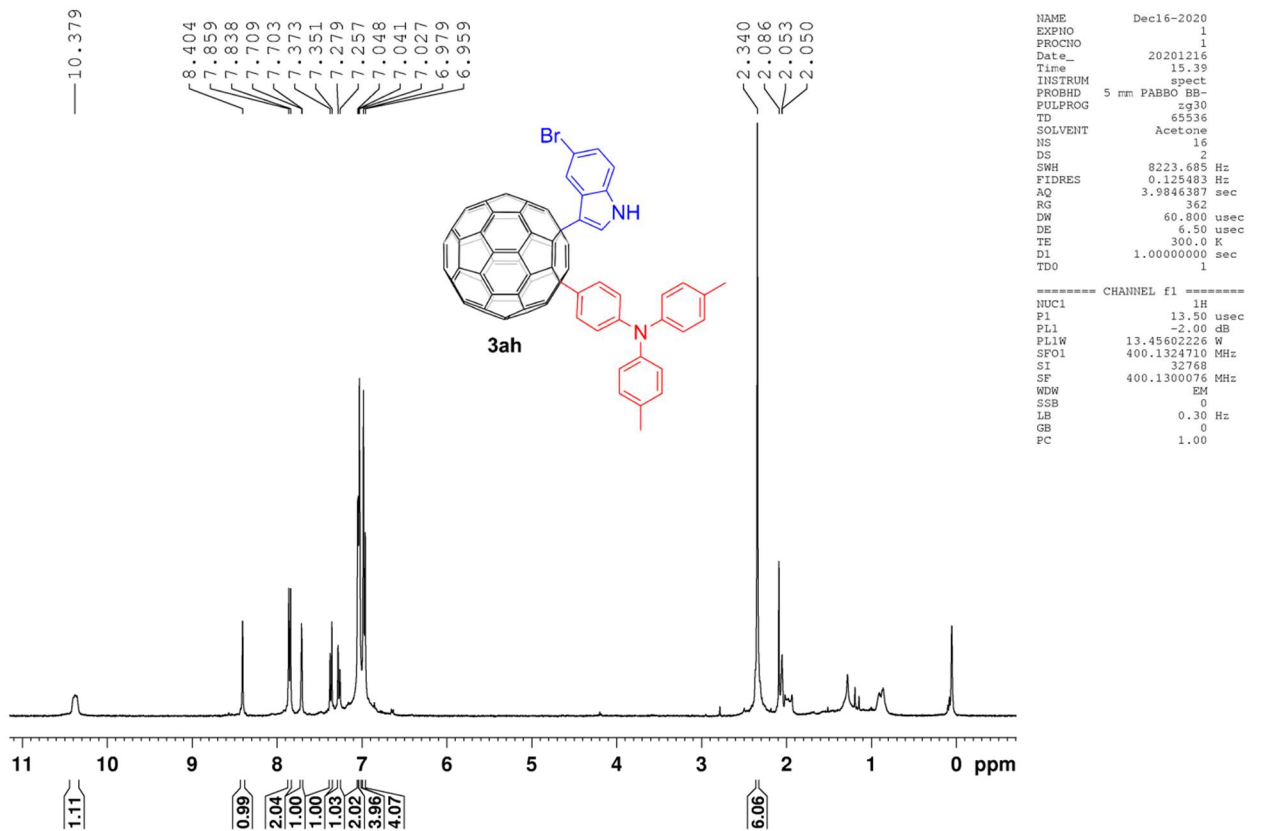

# <sup>13</sup>C NMR (100 MHz, CS<sub>2</sub>/d<sub>6</sub>-acetone) of compound 3ah

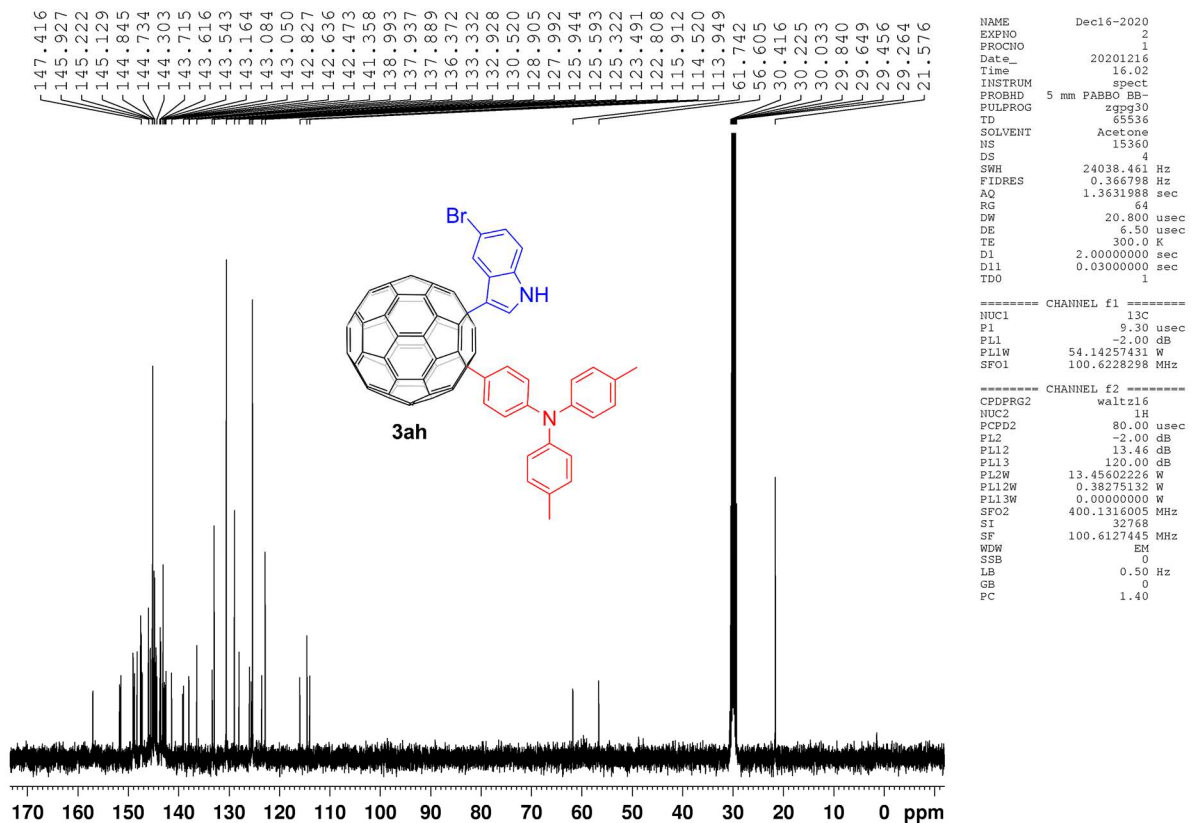

### Expanded <sup>13</sup>C NMR (100 MHz, CS<sub>2</sub>/d<sub>6</sub>-acetone) of compound 3ah

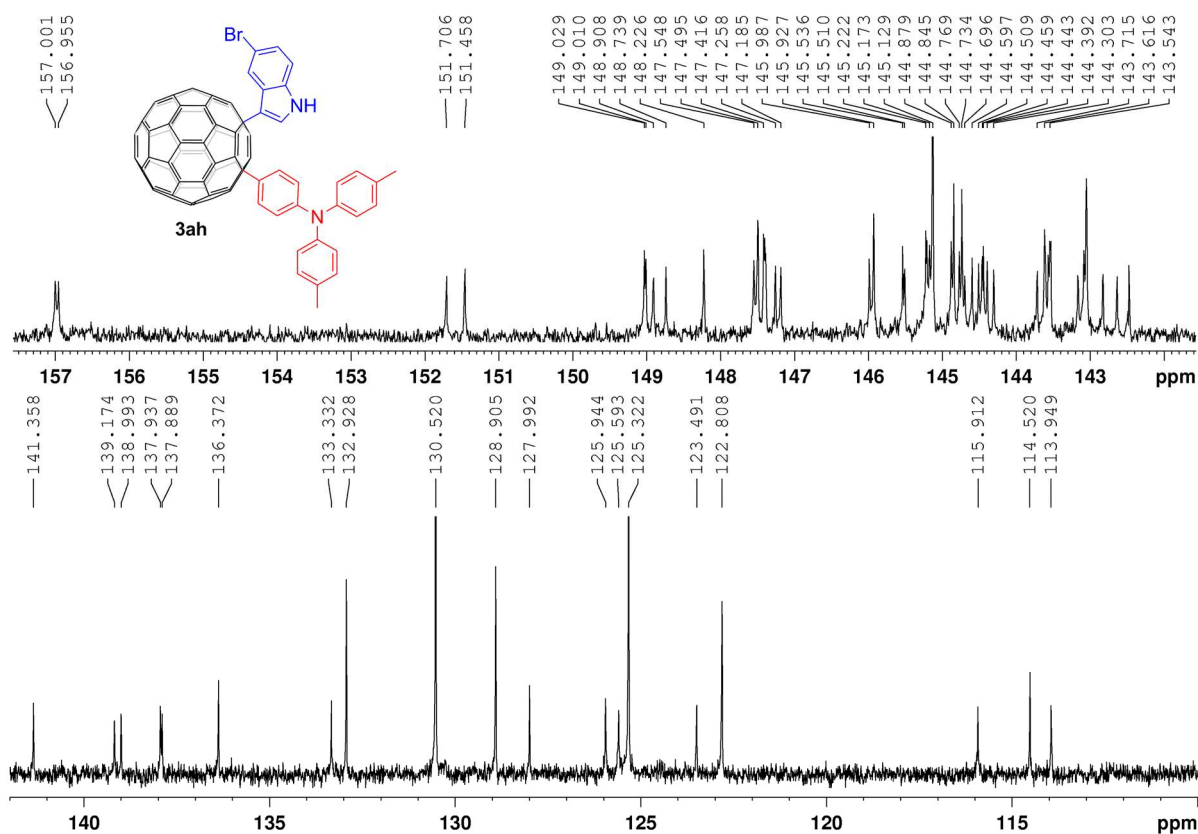

### <sup>1</sup>H NMR (400 MHz, CS<sub>2</sub>/d<sub>6</sub>-acetone) of compound 3ai

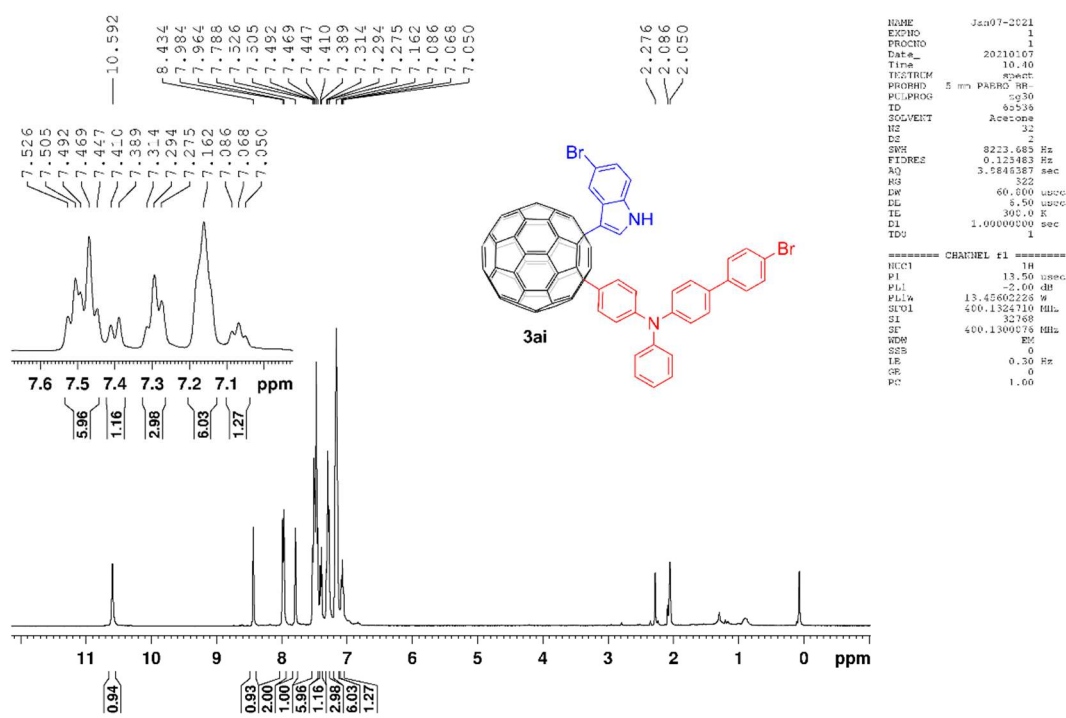

### <sup>13</sup>C NMR (100 MHz, CS<sub>2</sub>/d<sub>6</sub>-acetone) of compound 3ai

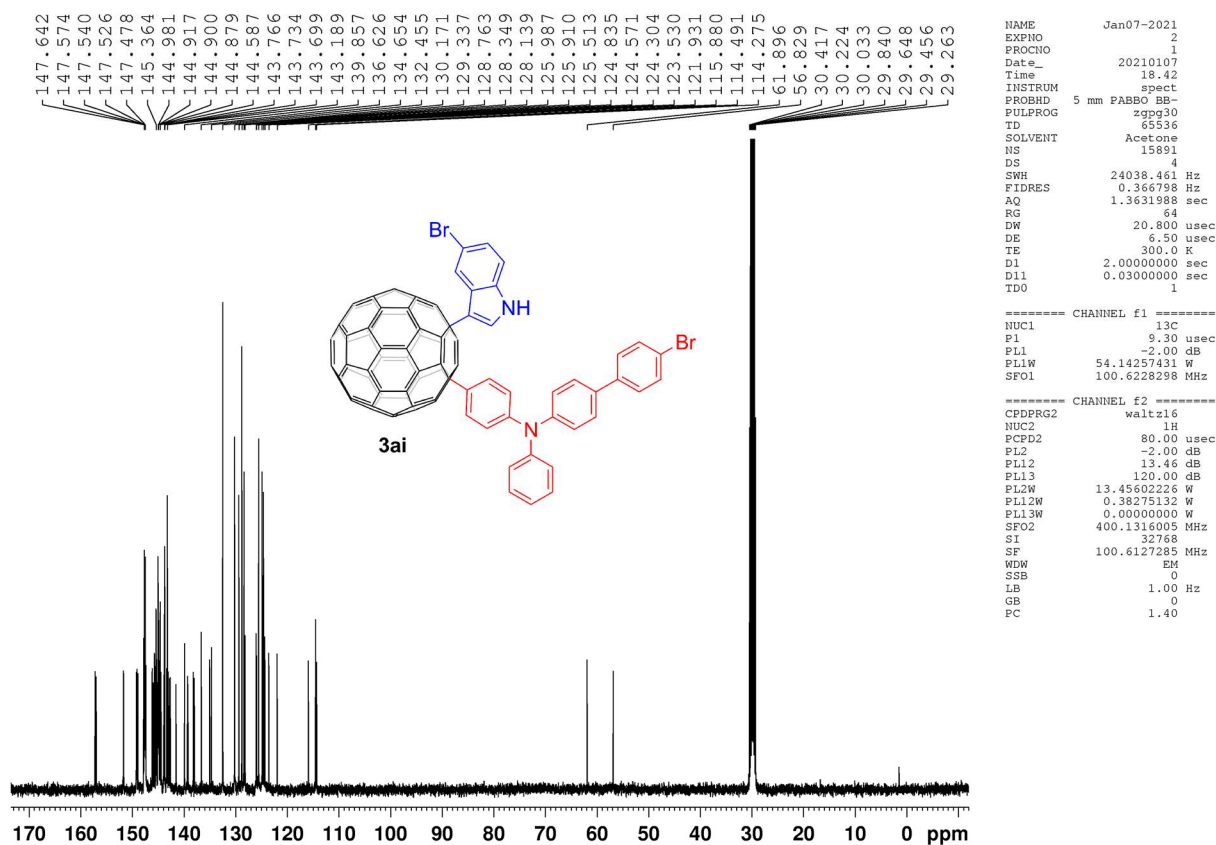

### Expanded <sup>13</sup>C NMR (100 MHz, CS<sub>2</sub>/d<sub>6</sub>-acetone) of compound 3ai

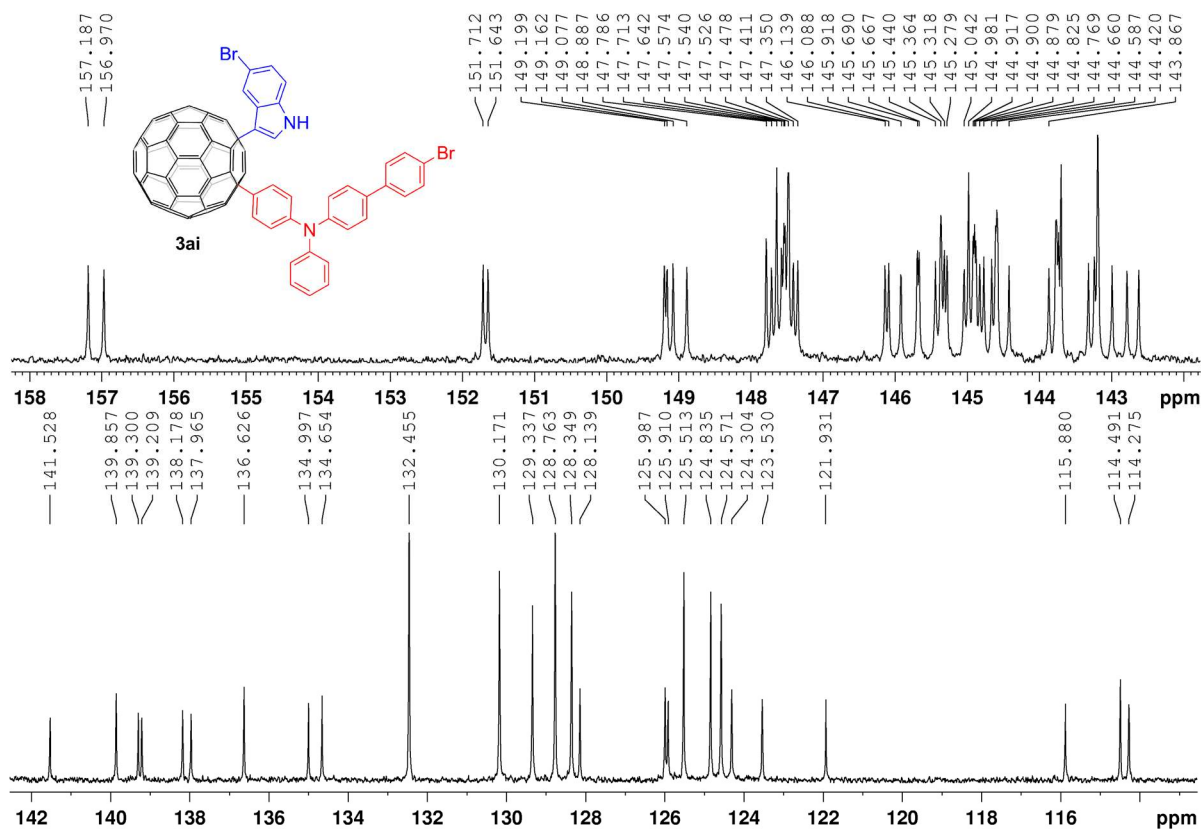

### <sup>1</sup>H NMR (400 MHz, CS<sub>2</sub>/d<sub>6</sub>-acetone) of compound 3fi

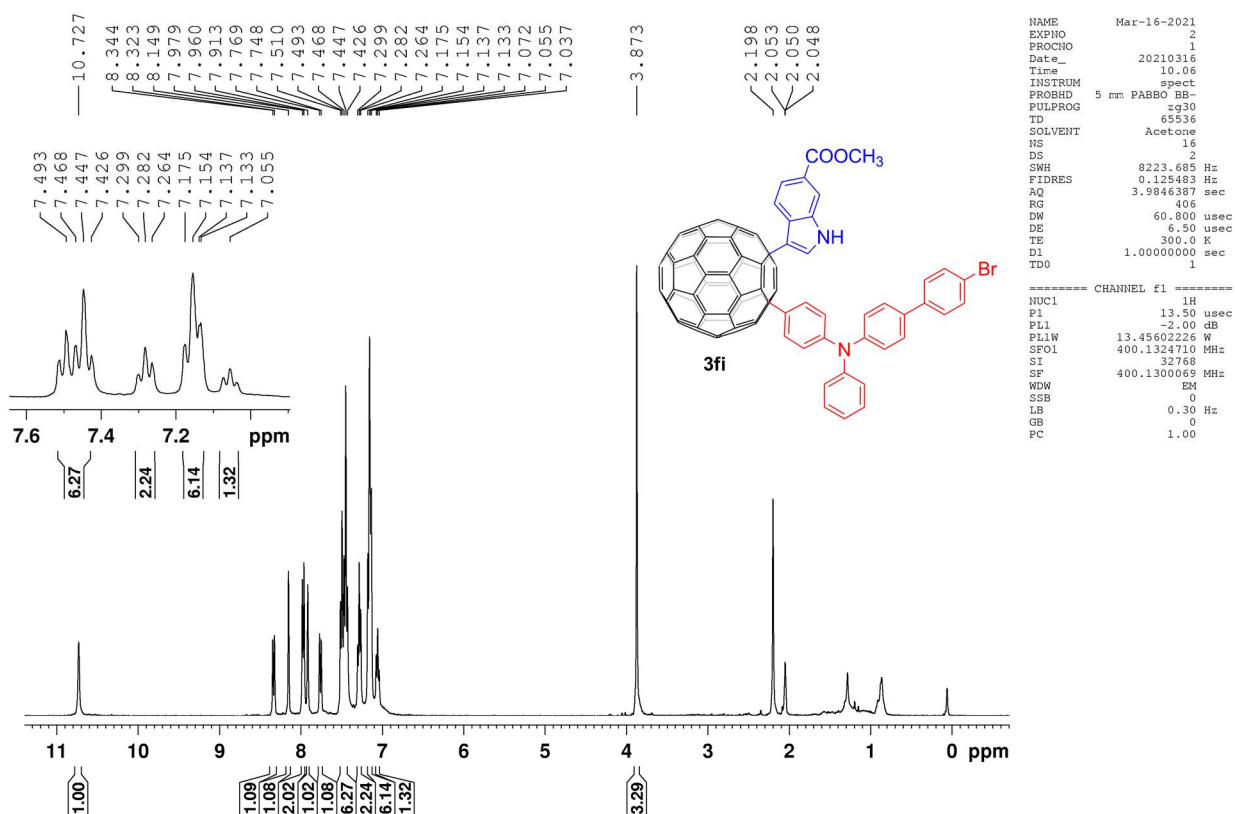

### <sup>13</sup>C NMR (100 MHz, CS<sub>2</sub>/d<sub>6</sub>-acetone) of compound 3fi

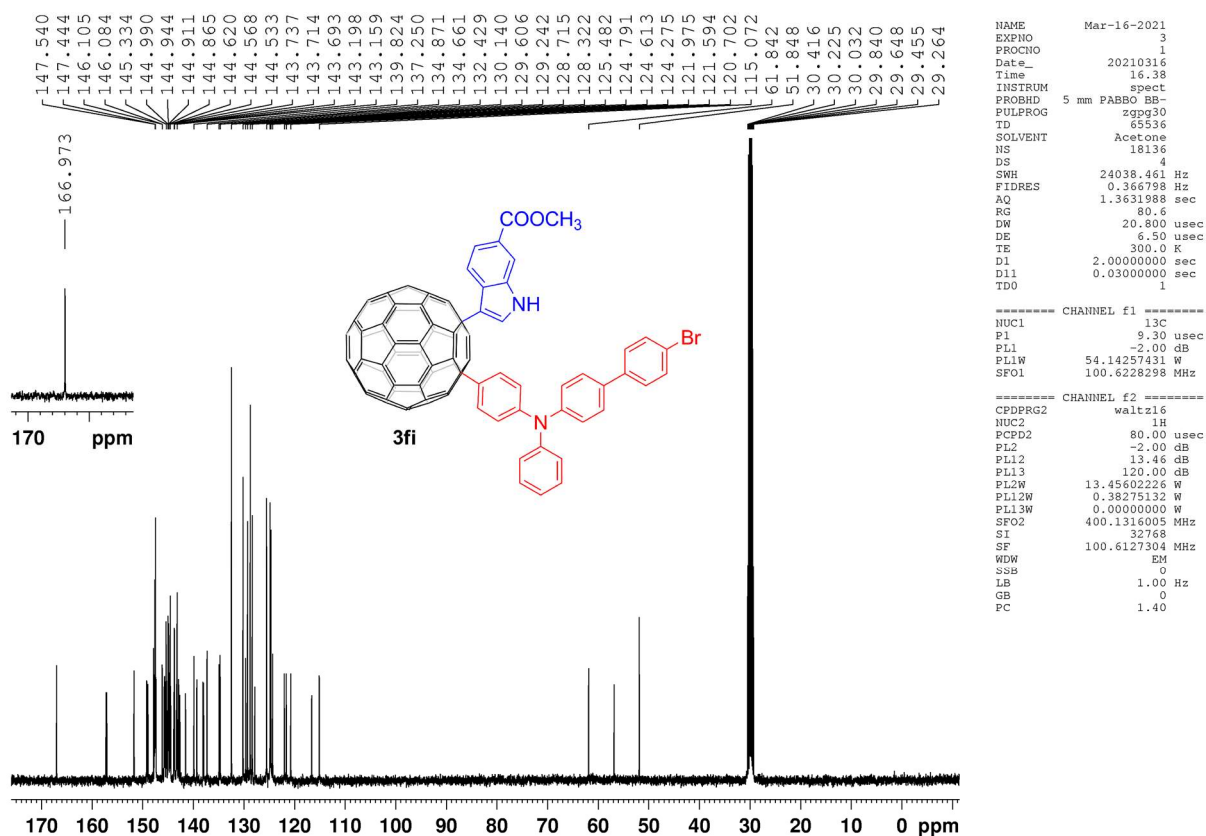



### Expanded <sup>13</sup>C NMR (100 MHz, CS<sub>2</sub>/d<sub>6</sub>-acetone) of compound 3fi

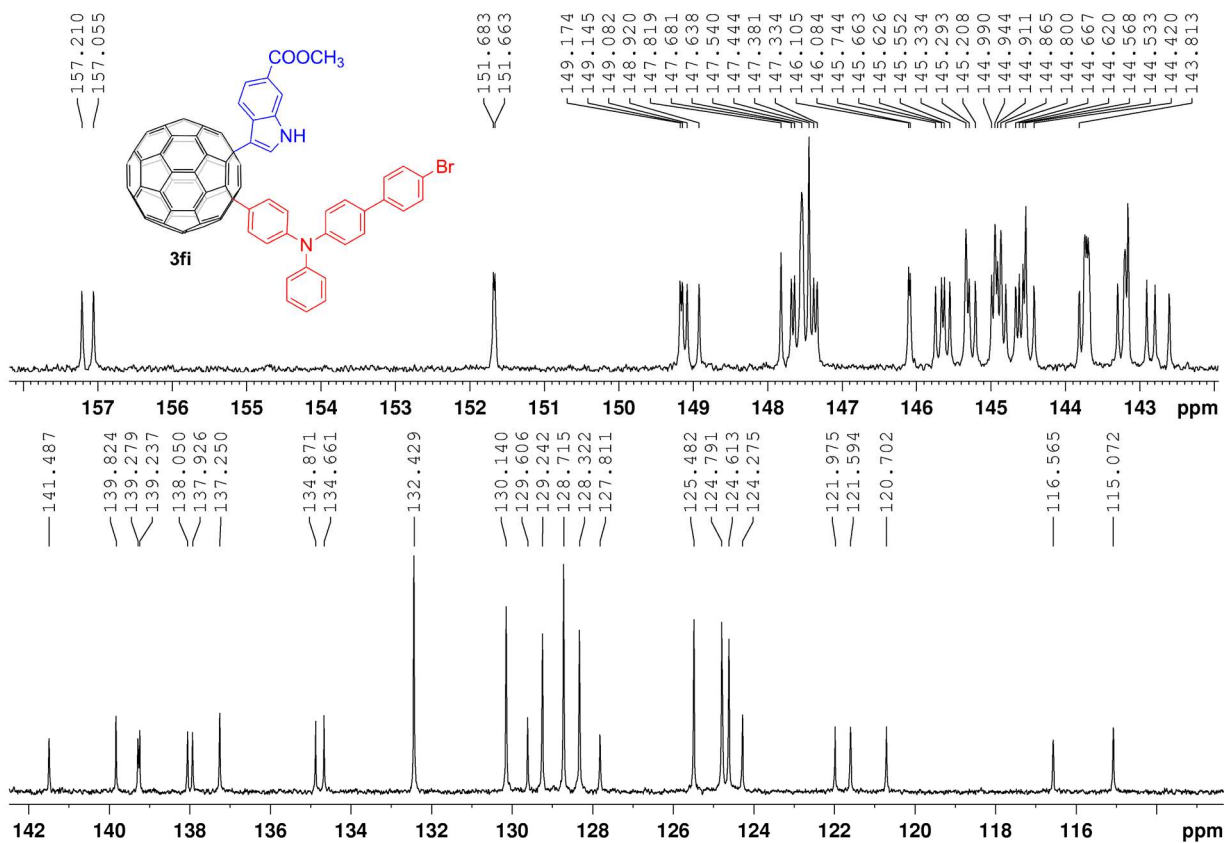

### <sup>1</sup>H NMR (400 MHz, CS<sub>2</sub>/d<sub>6</sub>-acetone) of compound 3aj

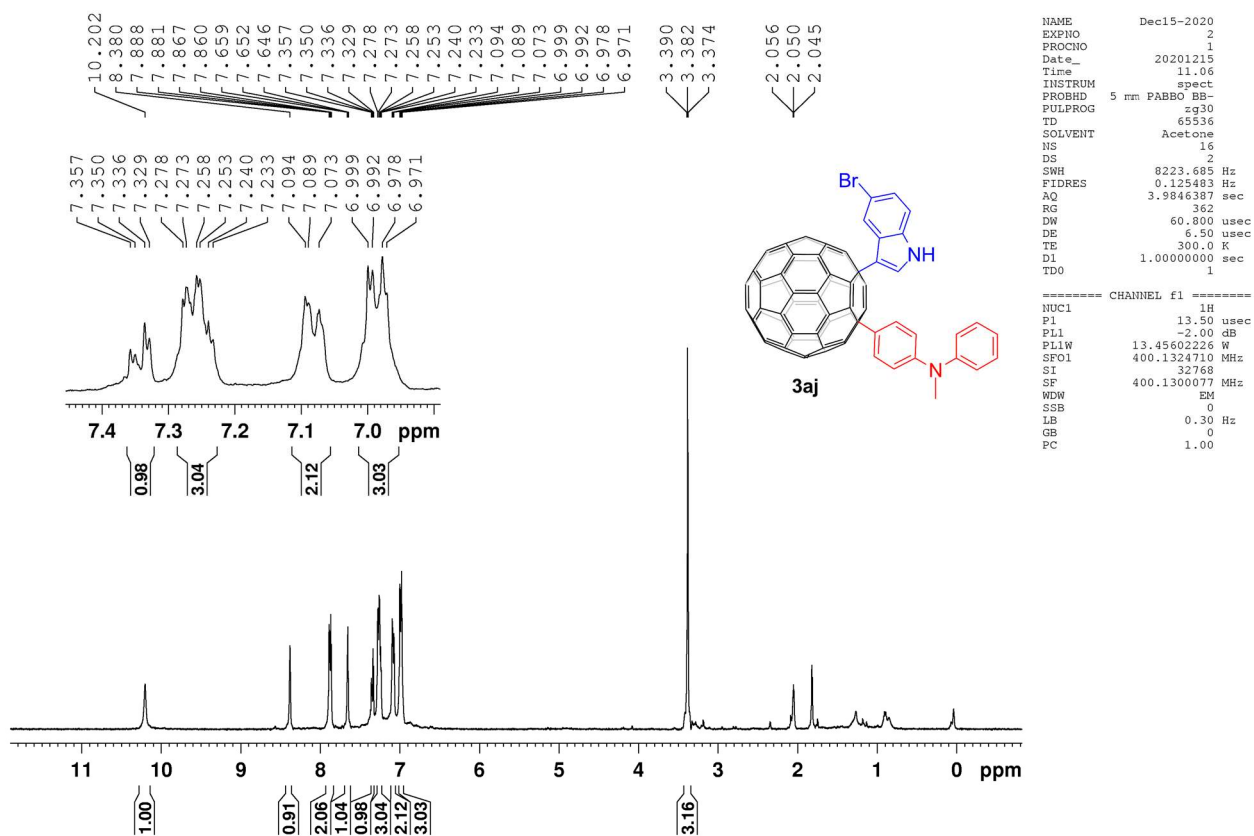

### <sup>13</sup>C NMR (100 MHz, CS<sub>2</sub>/d<sub>6</sub>-acetone) of compound 3aj

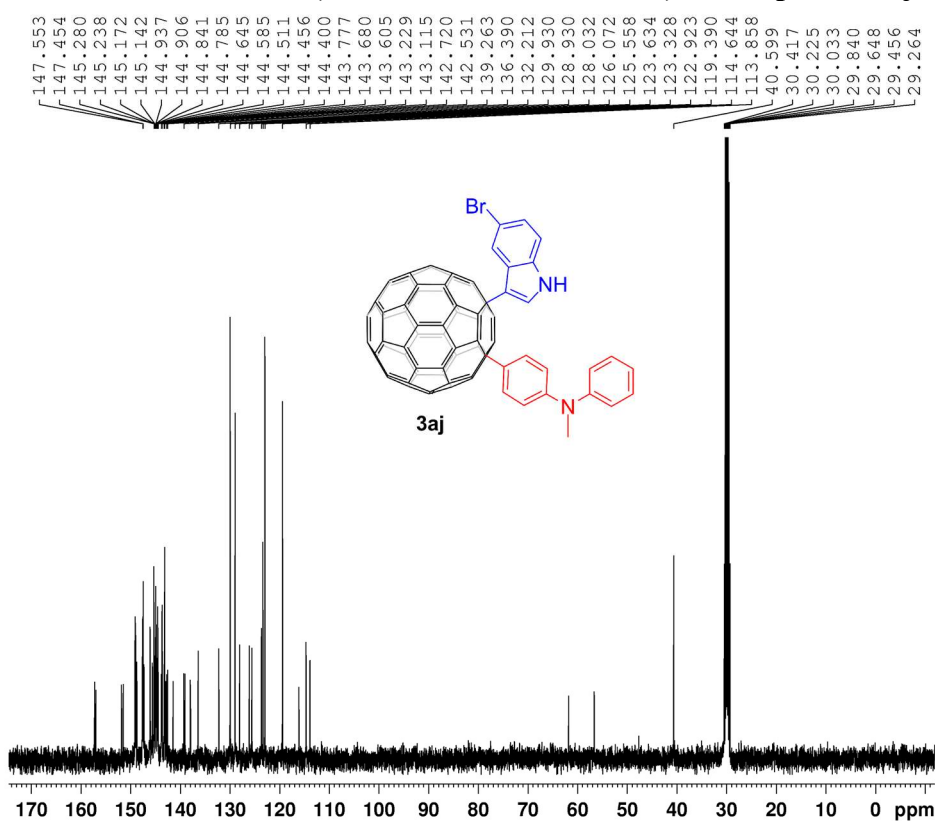

```

NAME      Dec15-2020
EXPNO    3
PROCNO   1
Date_    20201215
Time     17.14
INSTRUM  spect
PROBHD   5 mm PABBO BB-
PULPROG  zgpg30
TD        65536
SOLVENT  Acetone
NS        18472
DS        4
SWH       24038.461 Hz
FIDRES   0.366798 Hz
AQ        1.3631988 sec
RG        64
DW        20.800 usec
DE        6.50 usec
TE        300.0 K
D1        2.00000000 sec
D11       0.03000000 sec
TDO       1

===== CHANNEL f1 =====
NUC1      13C
P1        9.30 usec
PL1       -2.00 dB
PLW       54.14257431 W
SF01      100.6228298 MHz

===== CHANNEL f2 =====
CPDPRG2  waltz16
NUC2      1H
PCPD2    80.00 usec
PL2       -2.00 dB
PL12     13.46 dB
PL13     120.00 dB
PLW      13.45602226 W
PL12W    0.38275132 W
PL13W    0.00000000 W
SFO2     400.1316005 MHz
SI        32768
SF        100.6127365 MHz
WDW       EM
SSB       0
LB        1.00 Hz
GB        0
PC        1.40
    
```

### Expanded <sup>13</sup>C NMR (100 MHz, CS<sub>2</sub>/d<sub>6</sub>-acetone) of compound 3aj

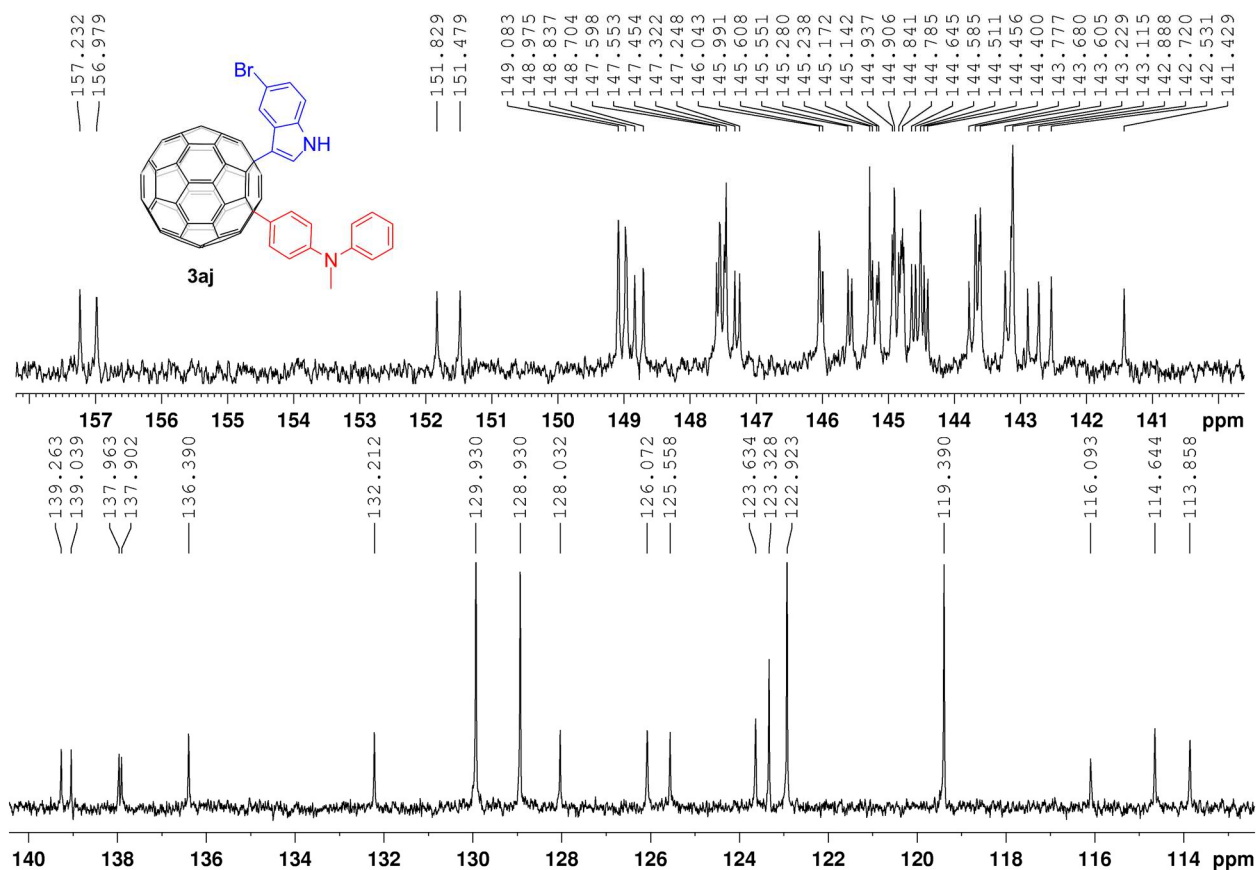

# <sup>1</sup>H NMR (400 MHz, CS<sub>2</sub>/d<sub>6</sub>-DMSO) of compound 3ak

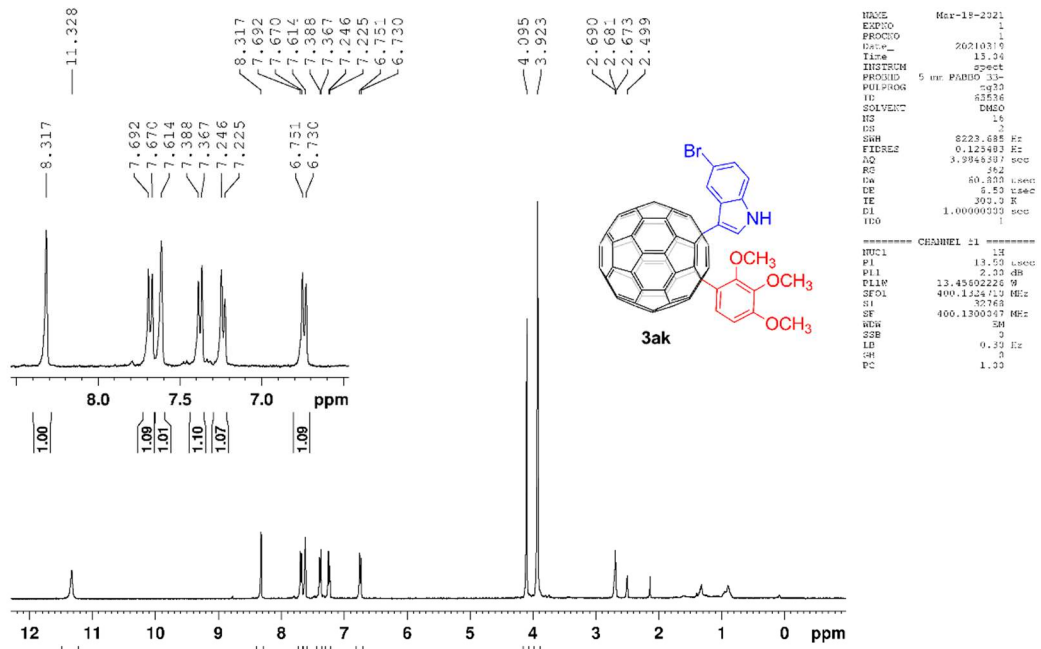

# <sup>13</sup>C NMR (100 MHz, CS<sub>2</sub>/d<sub>6</sub>-DMSO) of compound 3ak

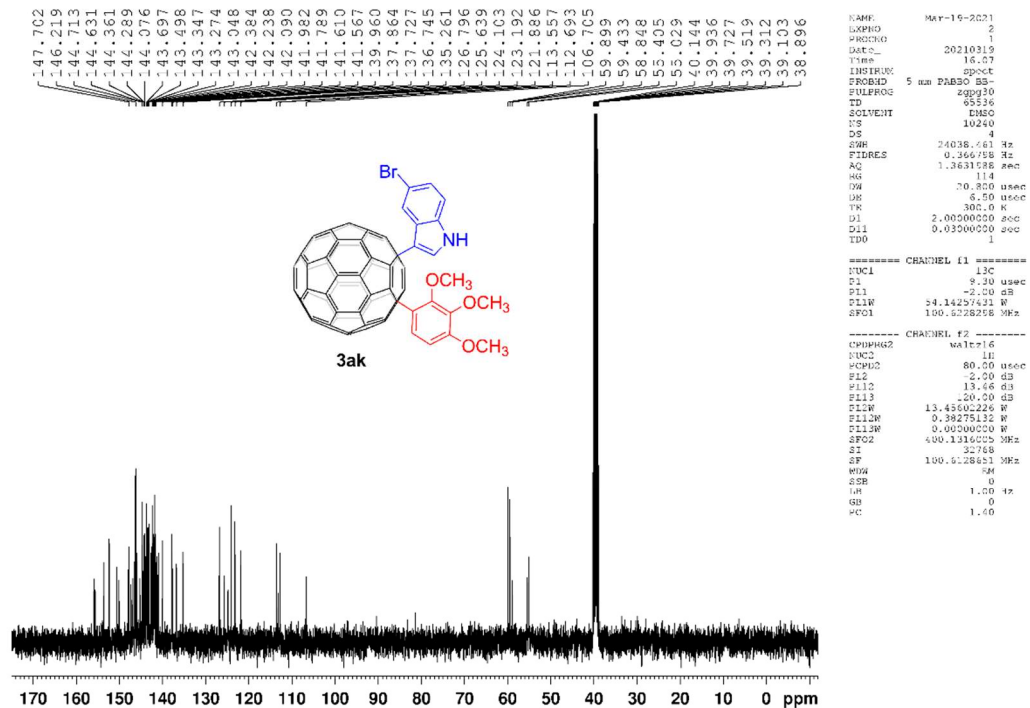

## Expanded $^{13}\text{C}$ NMR (100 MHz, $\text{CS}_2/\text{d}_6\text{-DMSO}$ ) of compound 3ak

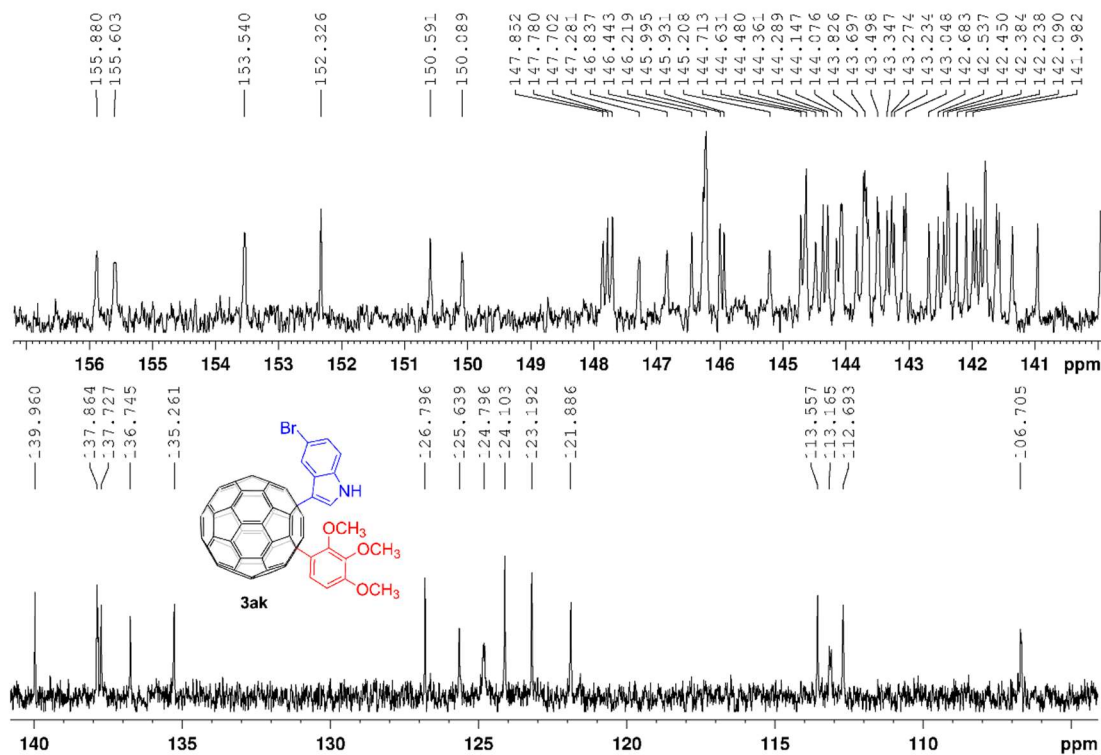

## $^1\text{H}$ NMR (400 MHz, $\text{CS}_2/\text{d}_6\text{-acetone}$ ) of compound 5aa

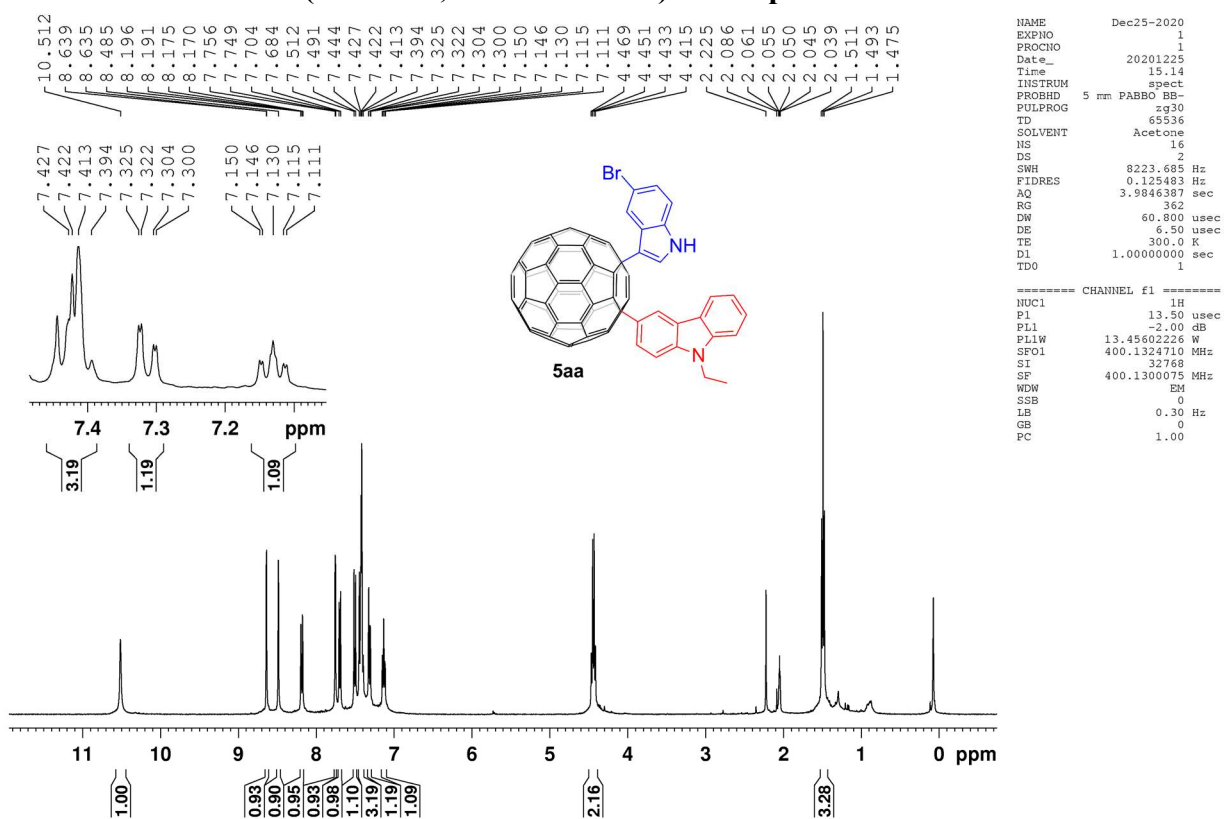

### <sup>13</sup>C NMR (100 MHz, CS<sub>2</sub>/d<sub>6</sub>-acetone) of compound 5aa

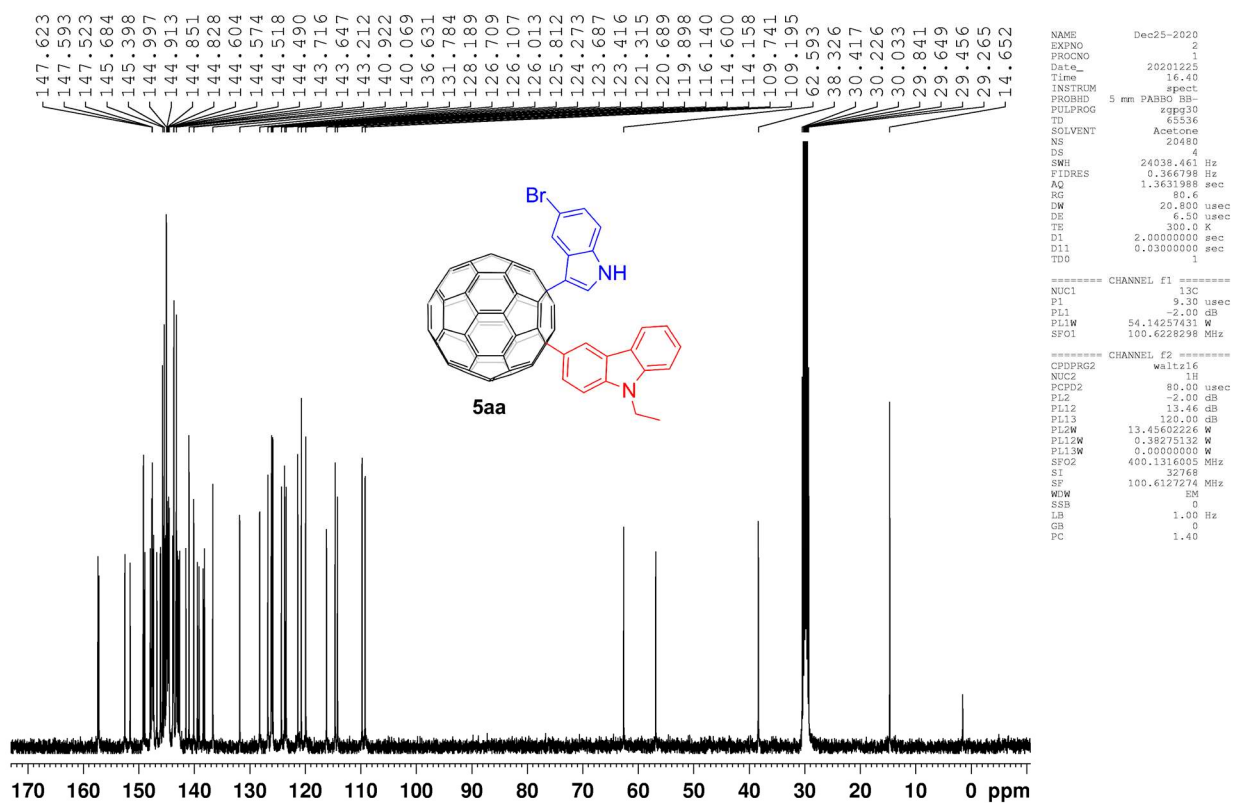

### Expanded <sup>13</sup>C NMR (100 MHz, CS<sub>2</sub>/d<sub>6</sub>-acetone) of compound 5aa

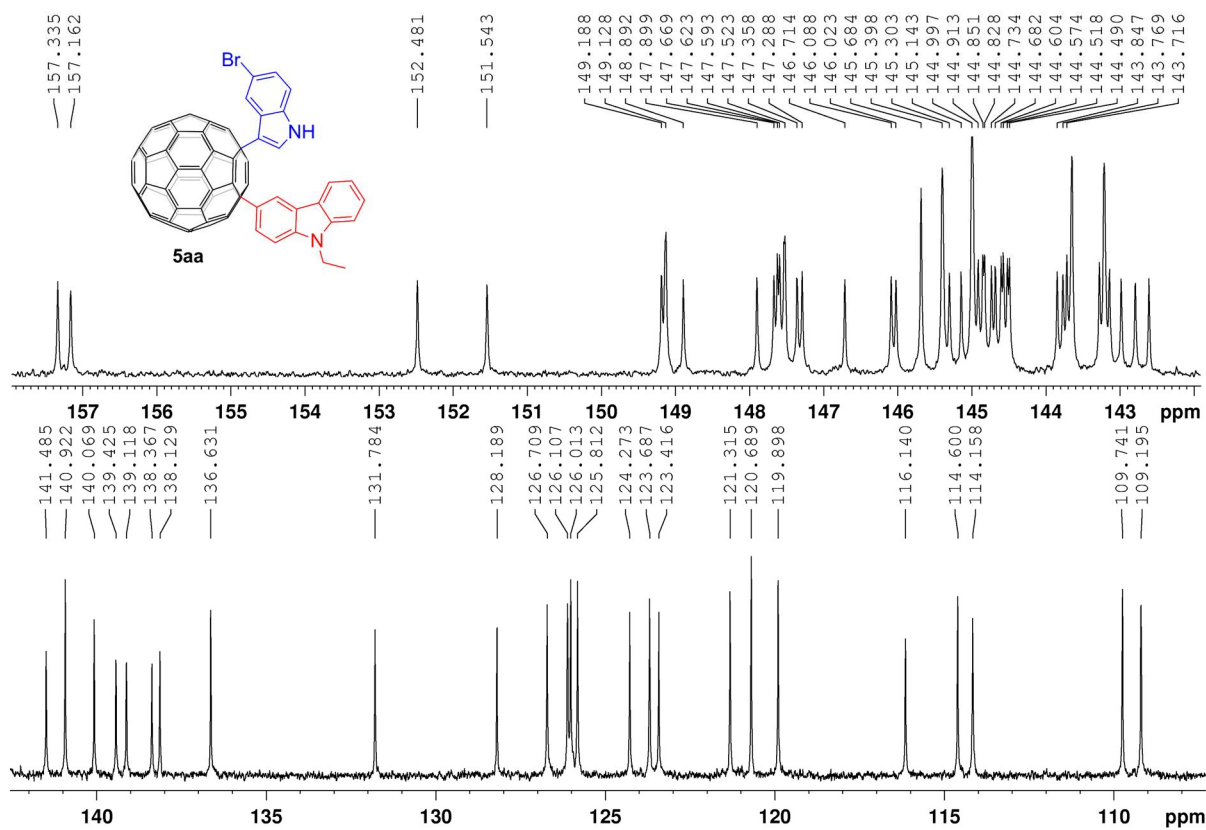

### <sup>1</sup>H NMR (400 MHz, CS<sub>2</sub>/d<sub>6</sub>-acetone) of compound 5ab

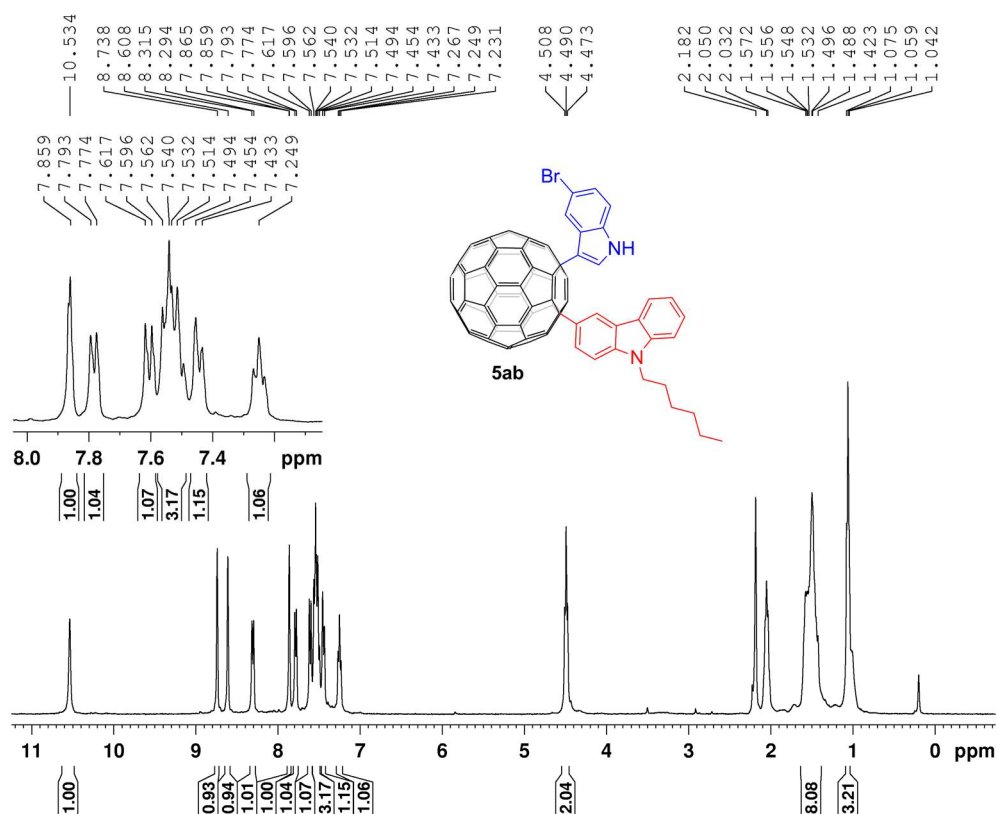

```

NAME      Mar30-2021
EXPNO    1
PROCNO   1
Date_    20210330
Time     10.03
INSTRUM spect
PROBHD   5 mm PABBO BB-
PULPROG zg30
TD       65536
SOLVENT  Acetone
NS       16
DS       2
SWH      8223.685 Hz
FIDRES   0.125483 Hz
AQ       3.9846387 sec
RG       362
DW       60.800 usec
DE       6.50 usec
TE       300.0 K
D1       1.00000000 sec
TD0      1

===== CHANNEL f1 =====
NUC1     1H
P1       13.50 usec
PL1     -2.00 dB
PL1W    13.45602226 W
SFO1    400.1324710 MHz
SI       32768
SF      400.1299527 MHz
WDW      EM
SSB      0
LB       1.00 Hz
GB       0
PC       1.00
    
```

### <sup>13</sup>C NMR (100 MHz, CS<sub>2</sub>/d<sub>6</sub>-acetone) of compound 5ab

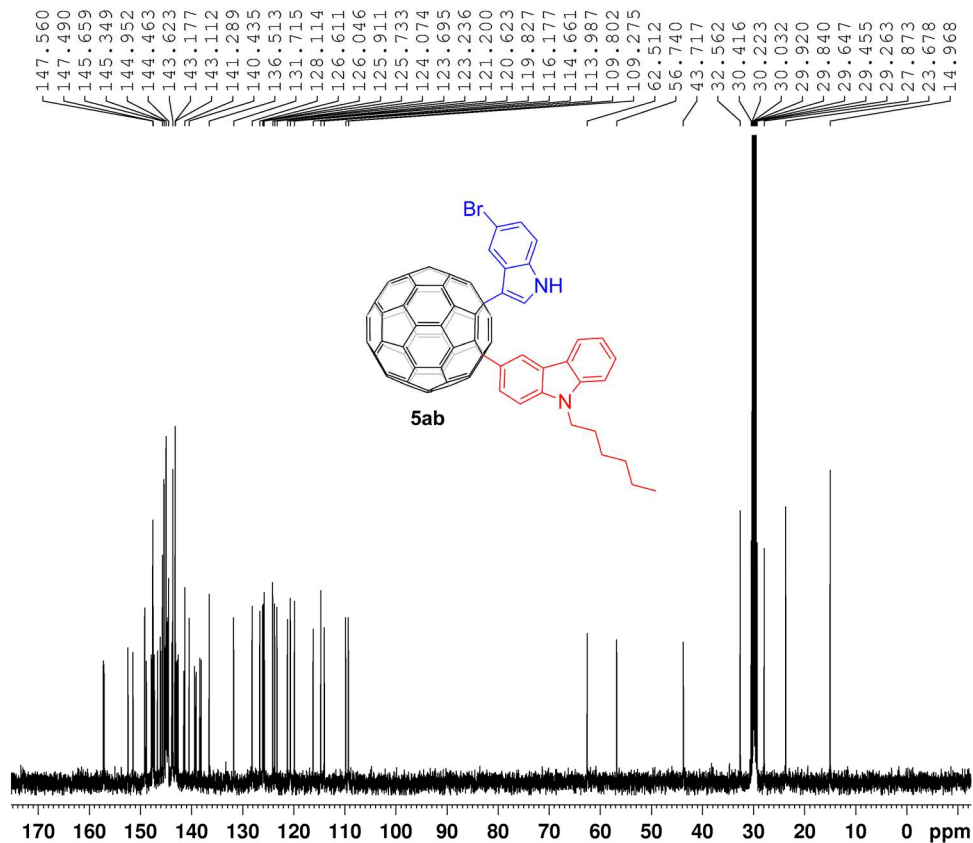

```

NAME      Mar30-2021
EXPNO    2
PROCNO   2
Date_    20210330
Time     17.08
INSTRUM spect
PROBHD   5 mm PABBO BB-
PULPROG zgpg30
TD       65536
SOLVENT  Acetone
NS       10240
DS       4
SWH      24038.461 Hz
FIDRES   0.366798 Hz
AQ       1.3631988 sec
RG       181
DW       20.800 usec
DE       6.50 usec
TE       300.0 K
D1       2.00000000 sec
D11      0.03000000 sec
TD0      1

===== CHANNEL f1 =====
NUC1     13C
P1       9.30 usec
PL1     -2.00 dB
PL1W    54.14257431 W
SFO1    100.6228298 MHz

===== CHANNEL f2 =====
CPDPRG2 waltz16
NUC2     1H
PCPD2   80.00 usec
PL2     -2.00 dB
PL12    13.46 dB
PL13    120.00 dB
PL2W    13.45602226 W
PL12W   0.38275132 W
PL13W   0.00000000 W
SFO2    400.1316005 MHz
SI       32768
SF      100.6127330 MHz
WDW      EM
SSB      0
LB       1.00 Hz
GB       0
PC       1.40
    
```

### Expanded $^{13}\text{C}$ NMR (100 MHz, $\text{CS}_2/\text{d}_6\text{-acetone}$ ) of compound **5ab**

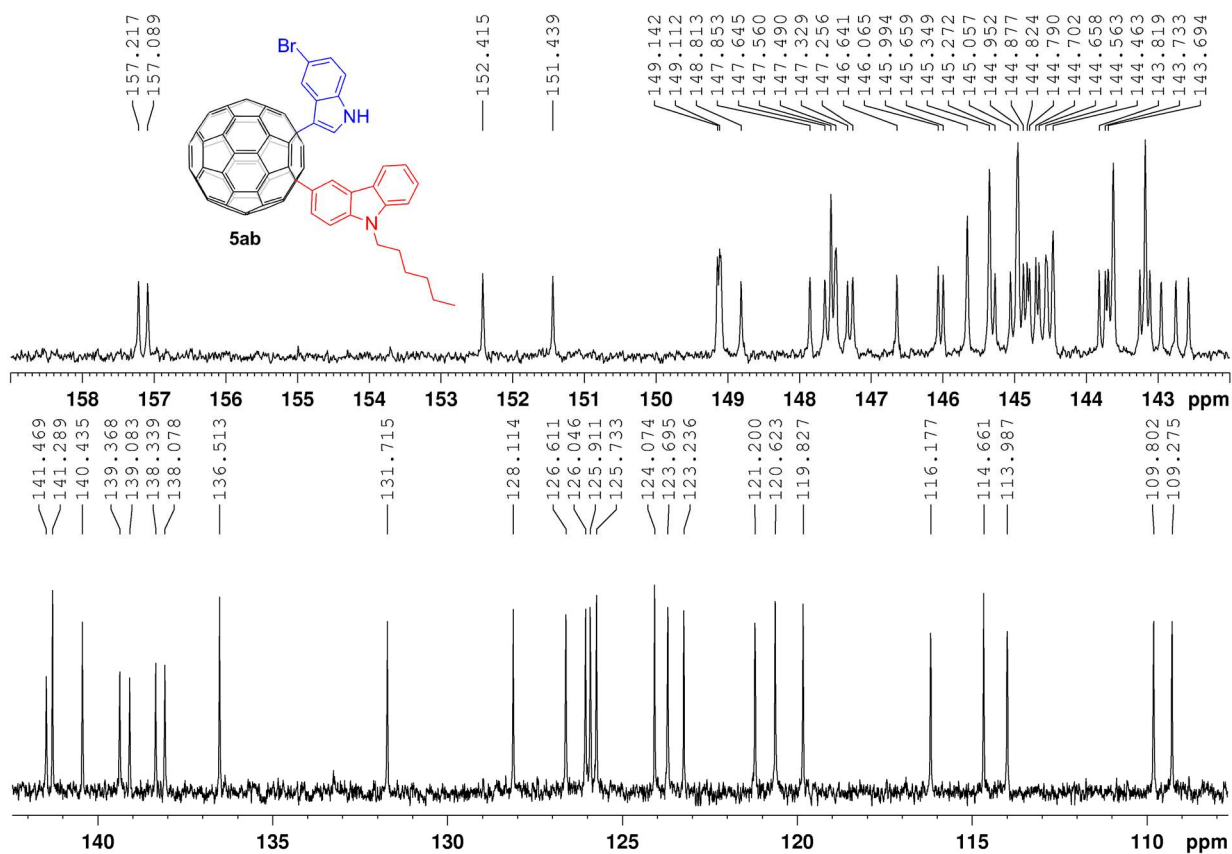

### $^1\text{H}$ NMR (400 MHz, $\text{CS}_2/\text{d}_6\text{-acetone}$ ) of compound **5ac**

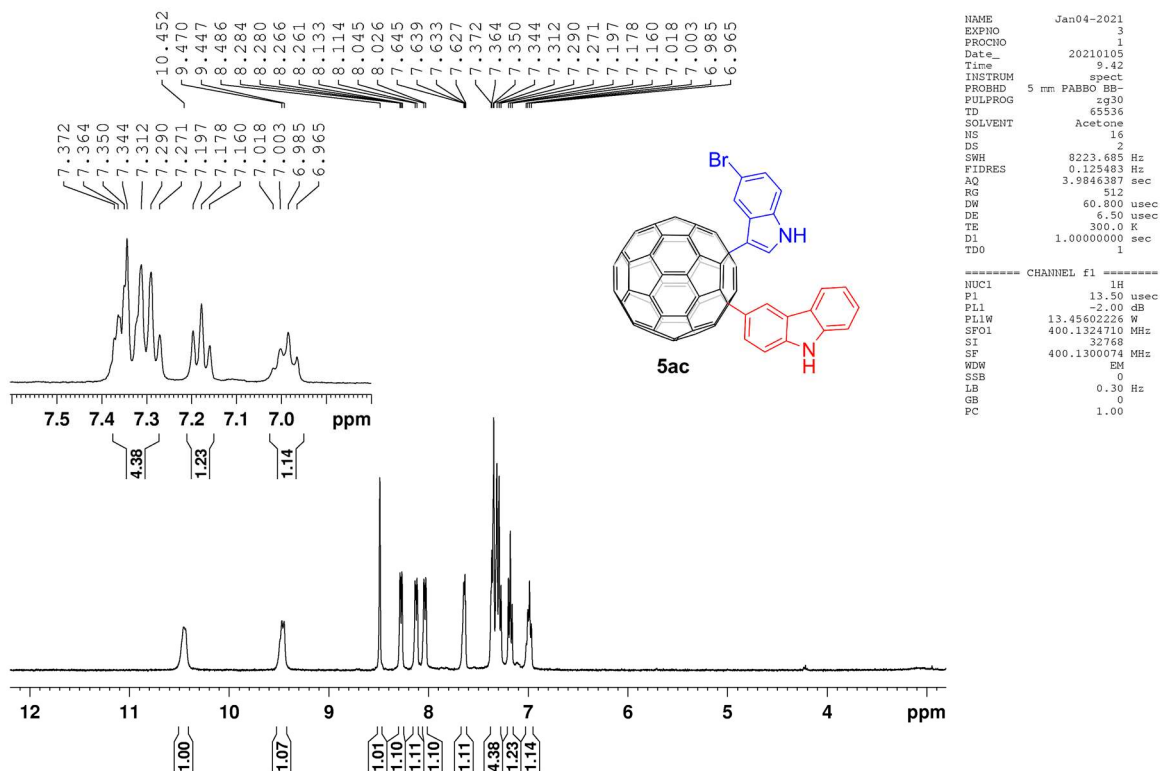

### <sup>13</sup>C NMR (100 MHz, CS<sub>2</sub>/d<sub>6</sub>-acetone) of compound 5ac

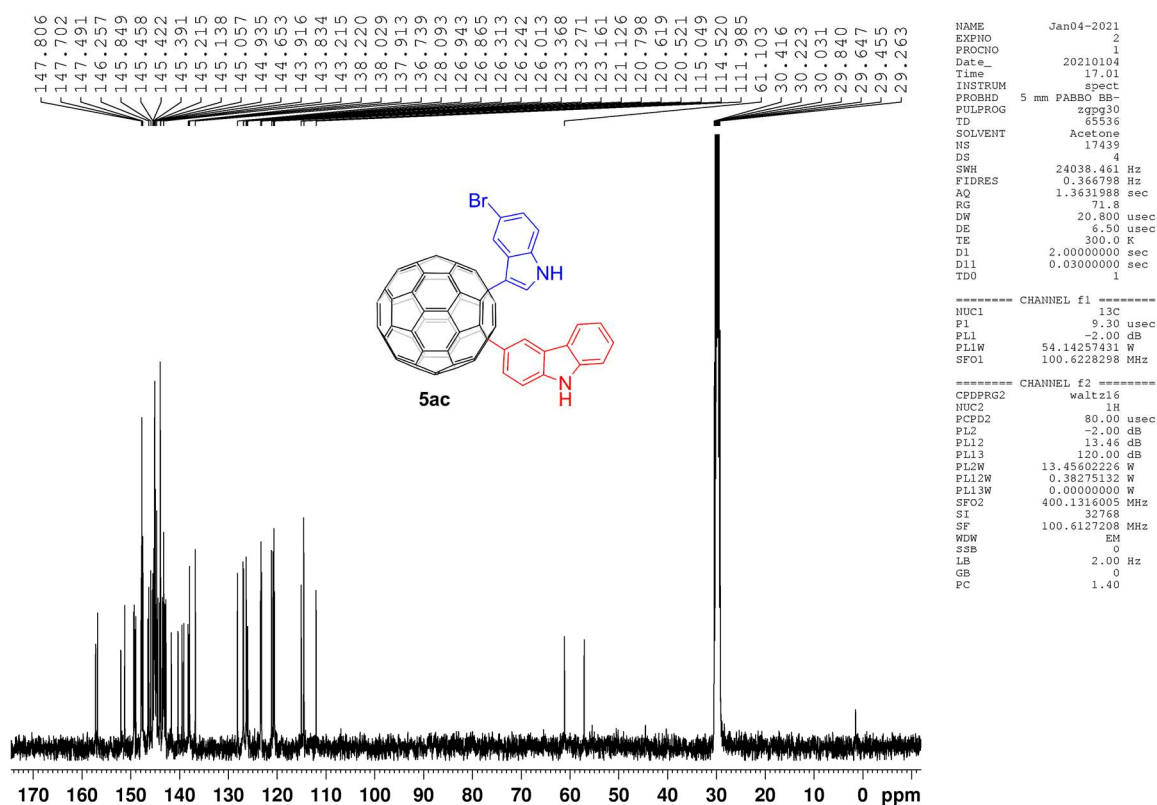

### Expanded <sup>13</sup>C NMR (100 MHz, CS<sub>2</sub>/d<sub>6</sub>-acetone) of compound 5ac

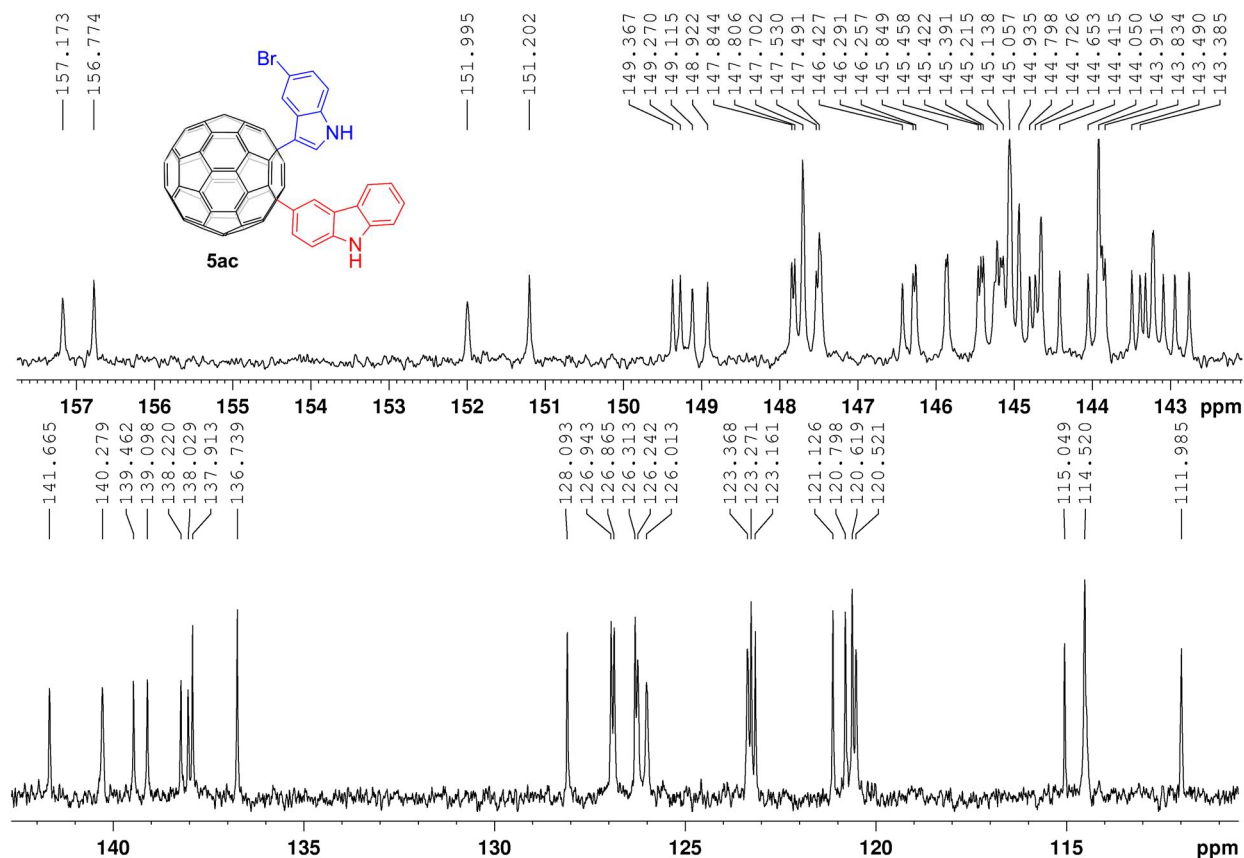



# <sup>1</sup>H NMR (400 MHz, CS<sub>2</sub>/d<sub>6</sub>-acetone) of compound 5ad

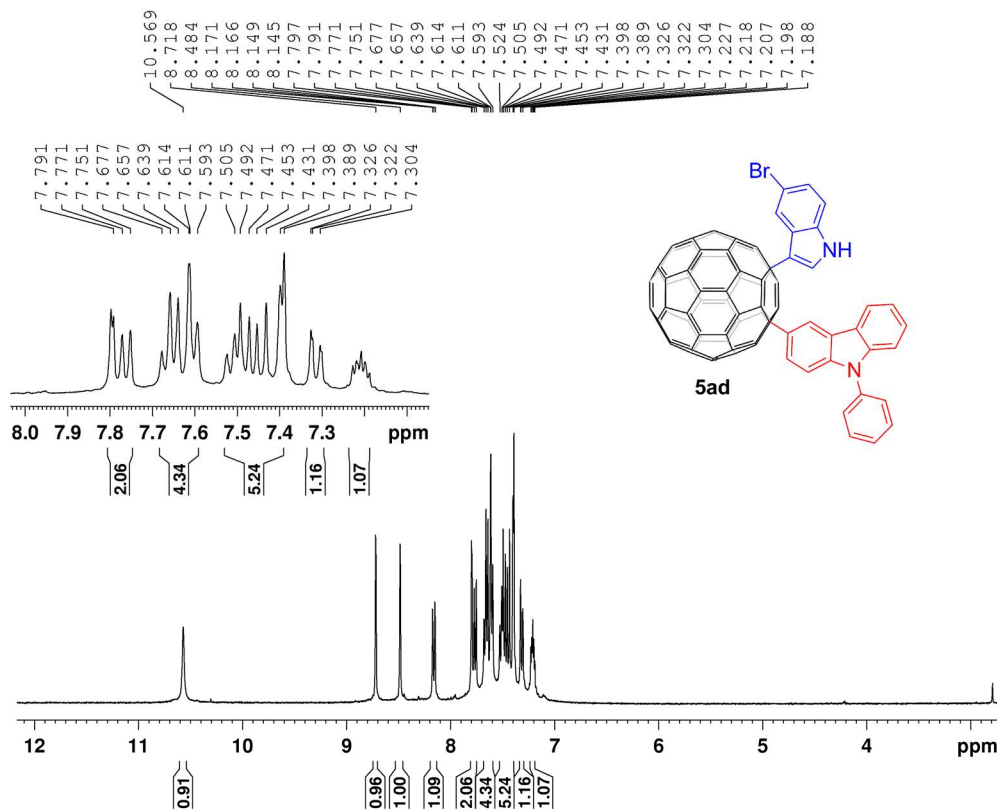

```

NAME      Dec24-2020
EXPNO    1
PROCNO   1
Date_    20201224
Time     19.29
INSTRUM  spect
PROBHD   5 mm PABBO BB-
PULPROG  zg30
TD        65536
SOLVENT  Acetone
NS        16
DS        2
SWH       8223.685 Hz
FIDRES    0.125483 Hz
AQ        3.9846387 sec
RG        362
DW        60.800 usec
DE        6.50 usec
TE        300.0 K
D1        1.00000000 sec
TD0       1
  
```

```

===== CHANNEL f1 =====
NUC1      1H
P1        13.50 usec
PL1       -2.00 dB
PL1W     13.45602226 W
SFO1     400.1324710 MHz
SI        32768
SF        400.1300073 MHz
WDW       EM
SSB       0
LB        0.30 Hz
GB        0
PC        1.00
  
```

# <sup>13</sup>C NMR (100 MHz, CS<sub>2</sub>/d<sub>6</sub>-acetone) of compound 5ad

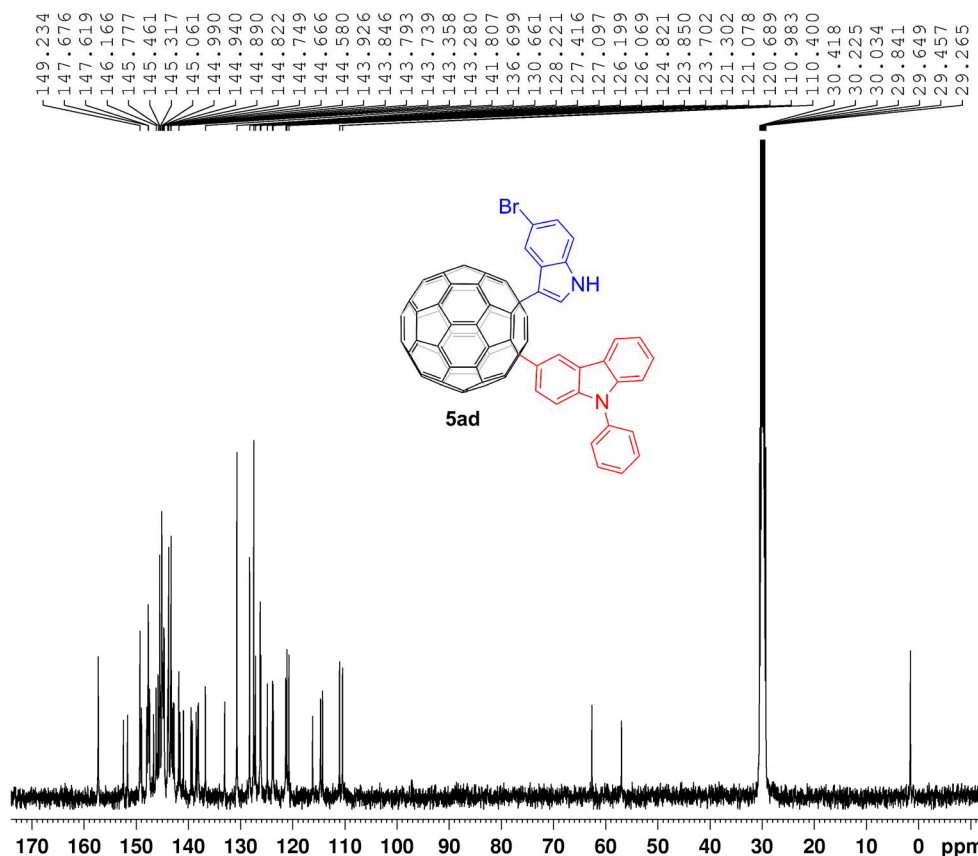

```

NAME      Dec24-2020
EXPNO    2
PROCNO   1
Date_    20201224
Time     19.34
INSTRUM  spect
PROBHD   5 mm PABBO BB-
PULPROG  zgpg30
TD        65536
SOLVENT  Acetone
NS        16305
DS        4
SWH       24038.461 Hz
FIDRES    0.366798 Hz
AQ        1.3631988 sec
RG        114
DW        20.800 usec
DE        6.50 usec
TE        300.0 K
D1        2.00000000 sec
D11       0.03000000 sec
TD0       1
  
```

```

===== CHANNEL f1 =====
NUC1      13C
P1        9.30 usec
PL1       -2.00 dB
PL1W     54.14257431 W
SFO1     100.6228298 MHz
  
```

```

===== CHANNEL f2 =====
CPDPRG2  waltz16
NUC2      1H
PCPD2    80.00 usec
PL2       -2.00 dB
PL12     13.46 dB
PL13     120.00 dB
PL2W     13.45602226 W
PL12W    0.38275132 W
PL13W    0.00000000 W
SFO2     400.1316005 MHz
SI        32768
SF        100.6127225 MHz
WDW       EM
SSB       0
LB        2.00 Hz
GB        0
PC        1.40
  
```

### Expanded <sup>13</sup>C NMR (100 MHz, CS<sub>2</sub>/d<sub>6</sub>-acetone) of compound 5ad

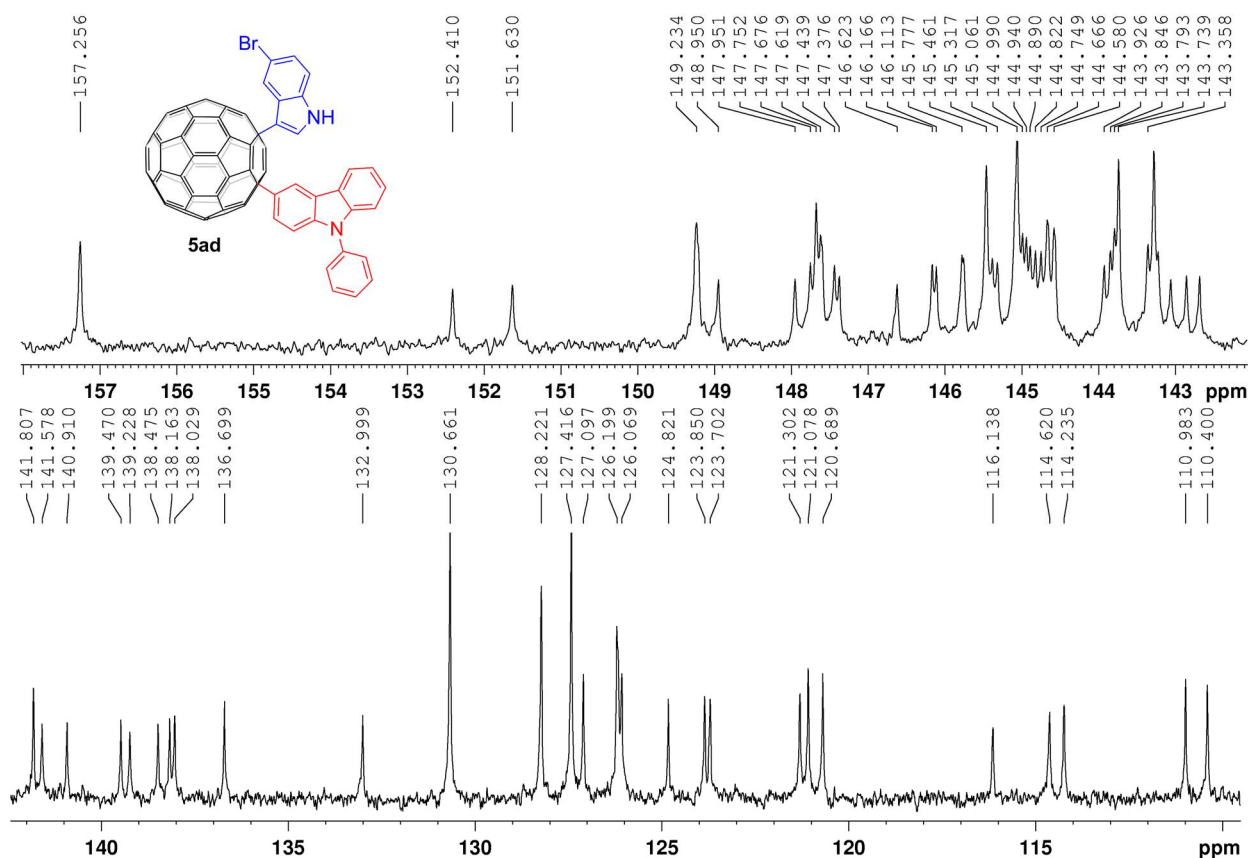

### <sup>1</sup>H NMR (400 MHz, CS<sub>2</sub>/d<sub>6</sub>-acetone) of compound 5ae

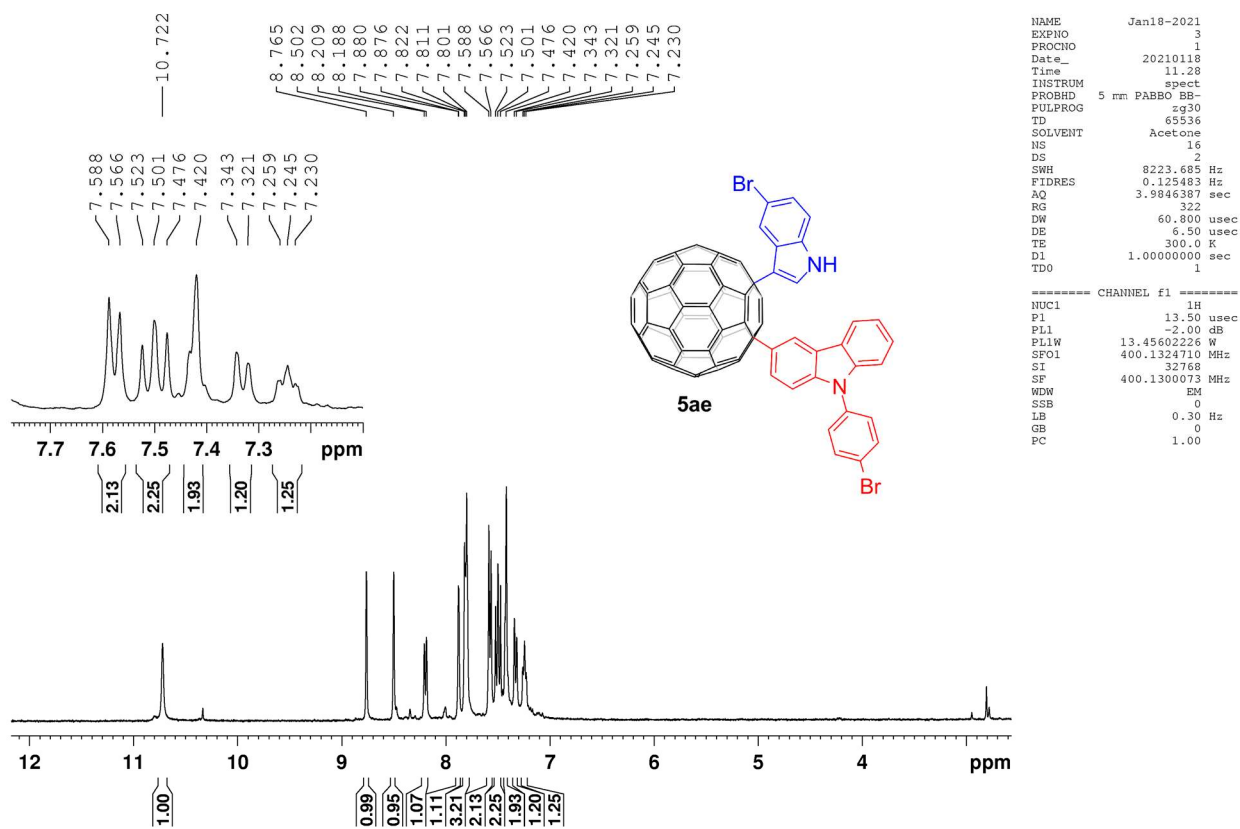

### <sup>13</sup>C NMR (100 MHz, CS<sub>2</sub>/d<sub>6</sub>-acetone) of compound 5ae

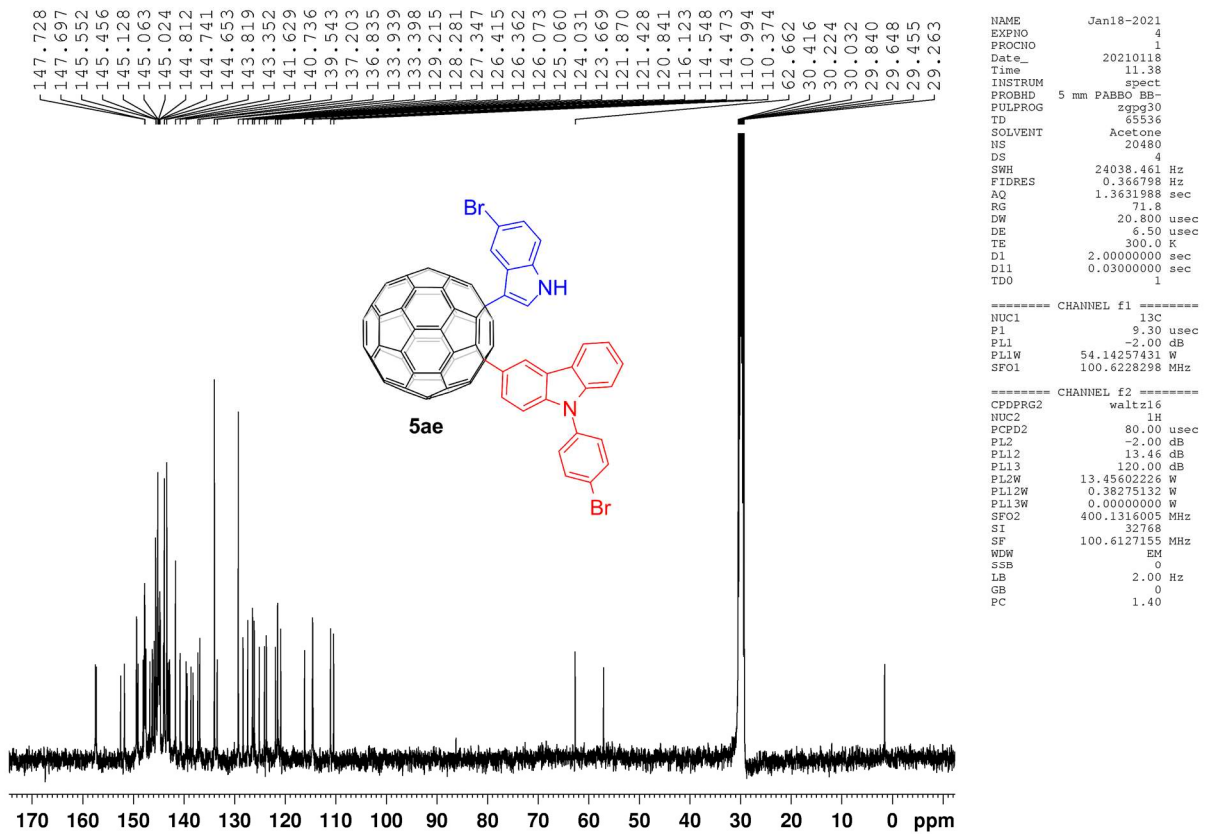

### Expanded <sup>13</sup>C NMR (100 MHz, CS<sub>2</sub>/d<sub>6</sub>-acetone) of compound 5ae

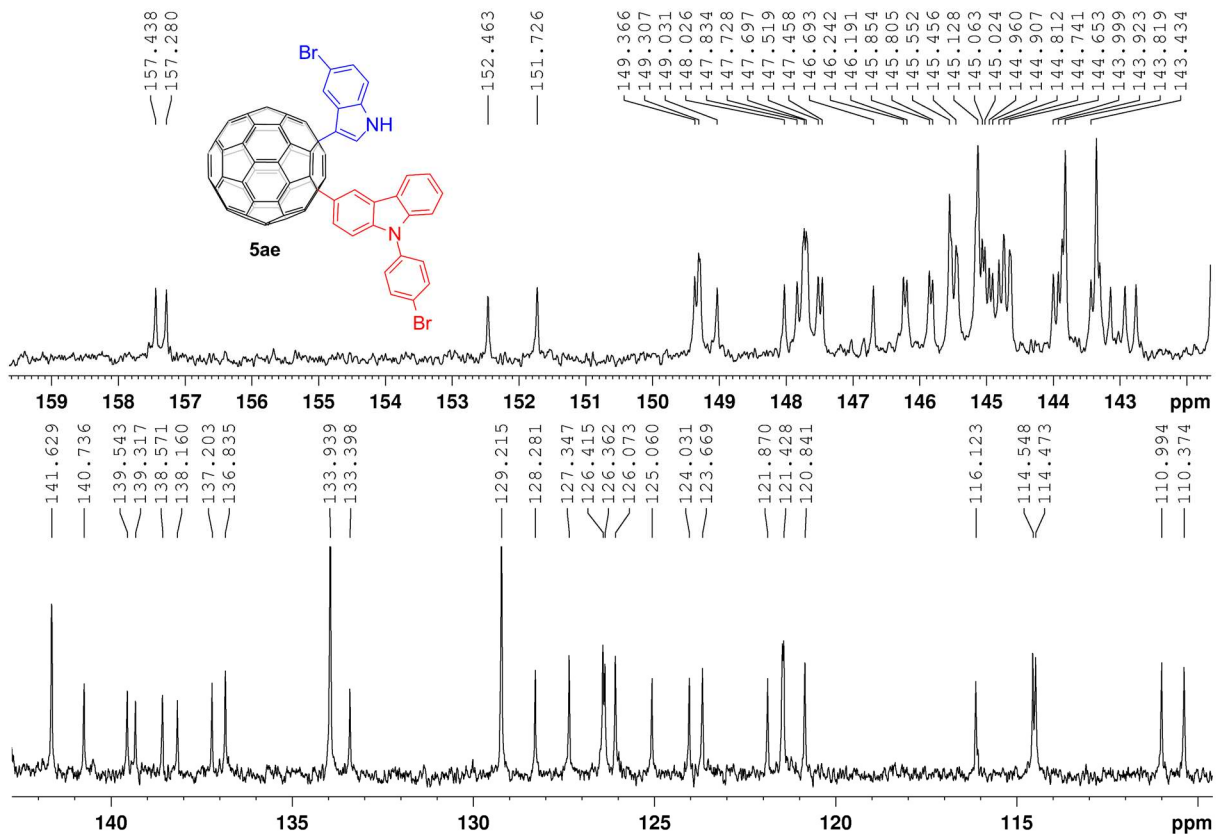

### <sup>1</sup>H NMR (400 MHz, CS<sub>2</sub>/d<sub>6</sub>-acetone) of compound 5af

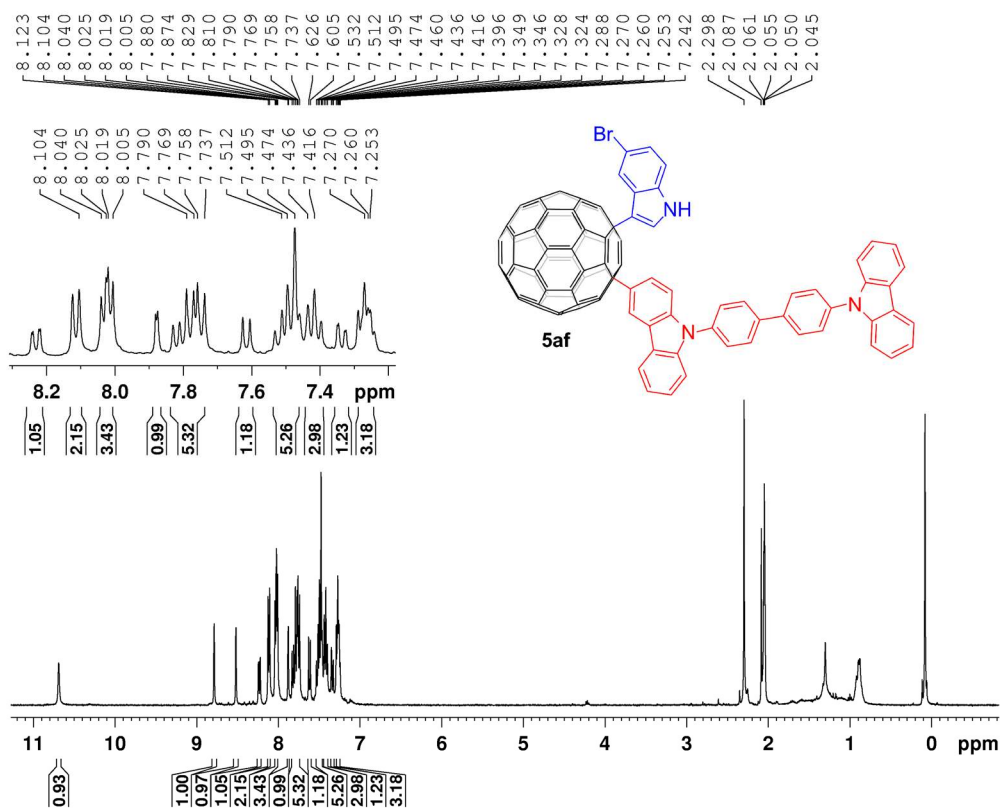

```

NAME      Jan05-2021
EXPNO    1
PROCNO   1
Date_    20210105
Time     9.56
INSTRUM  spect
PROBHD   5 mm F4BBO BB-
PULPROG  zg30
TD        65536
SOLVENT  Acetone
NS        16
DS        2
SWH       8223.685 Hz
FIDRES    0.125483 Hz
AQ        3.9846387 sec
RG         512
DW        60.800 usec
DE        6.50 usec
TE        300.0 K
D1        1.0000000 sec
TD0       1
    
```

```

===== CHANNEL f1 =====
NUC1      1H
P1        13.50 usec
PL1       -2.00 dB
PL1W      13.45602226 W
SFO1      400.1324710 MHz
SI        32768
SF        400.1300075 MHz
WDW       EM
SSB       0
LB        0.30 Hz
GB        0
PC        1.00
    
```

### <sup>13</sup>C NMR (100 MHz, CS<sub>2</sub>/d<sub>6</sub>-acetone) of compound 5af

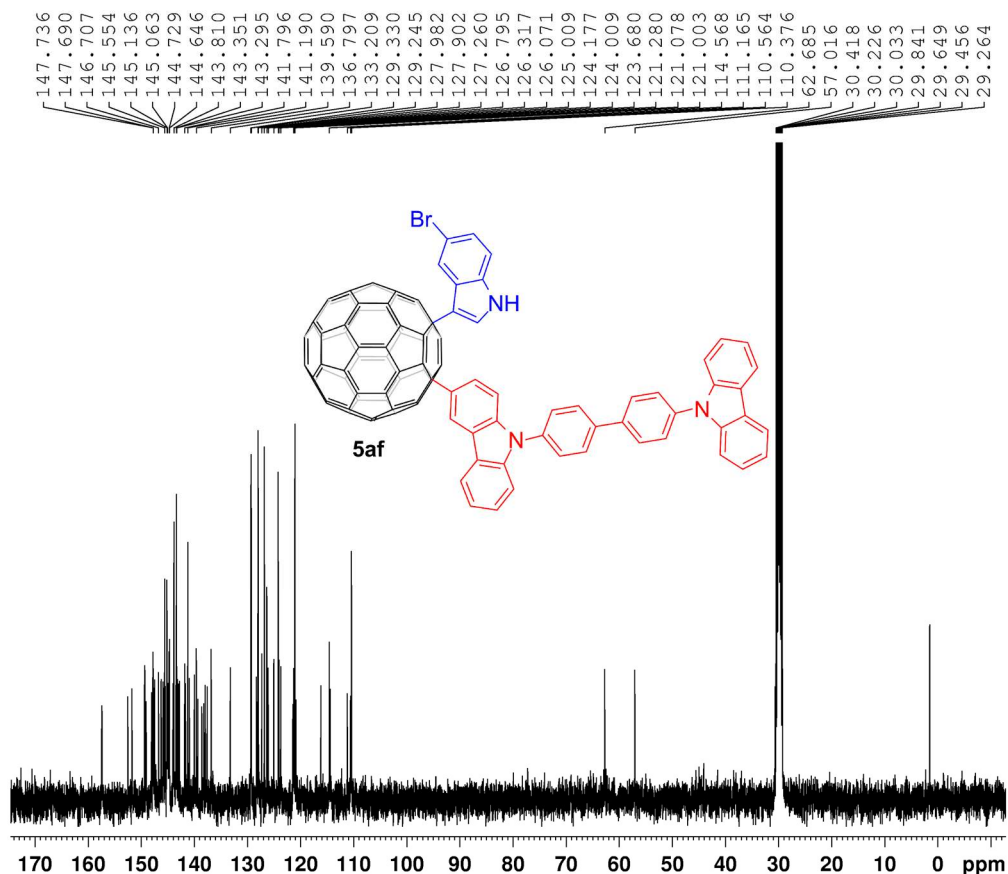

```

NAME      Jan05-2021
EXPNO    1
PROCNO   1
Date_    20210105
Time     16.57
INSTRUM  spect
PROBHD   5 mm F4BBO BB-
PULPROG  zgpg30
TD        65536
SOLVENT  Acetone
NS        18348
DS        4
SWH       24038.461 Hz
FIDRES    0.366798 Hz
AQ        1.3631988 sec
RG         114
DW        20.800 usec
DE        6.50 usec
TE        300.0 K
D1        2.0000000 sec
D11       0.0300000 sec
TD0       1
    
```

```

===== CHANNEL f1 =====
NUC1      13C
P1        9.30 usec
PL1       -2.00 dB
PL1W      54.14257431 W
SFO1      100.6228298 MHz
    
```

```

===== CHANNEL f2 =====
CPDPRG2  waltz16
NUC2      1H
PCPD2    80.00 usec
PL2       -2.00 dB
PL12     13.46 dB
PL13     120.00 dB
PL2W     13.45602226 W
PL12W    0.38275132 W
PL13W    0.00000000 W
SFO2     400.1316005 MHz
SI        32768
SF        100.6127186 MHz
WDW       EM
SSB       0
LB        1.00 Hz
GB        0
PC        1.40
    
```

### Expanded $^{13}\text{C}$ NMR (100 MHz, $\text{CS}_2/\text{d}_6\text{-acetone}$ ) of compound 5af

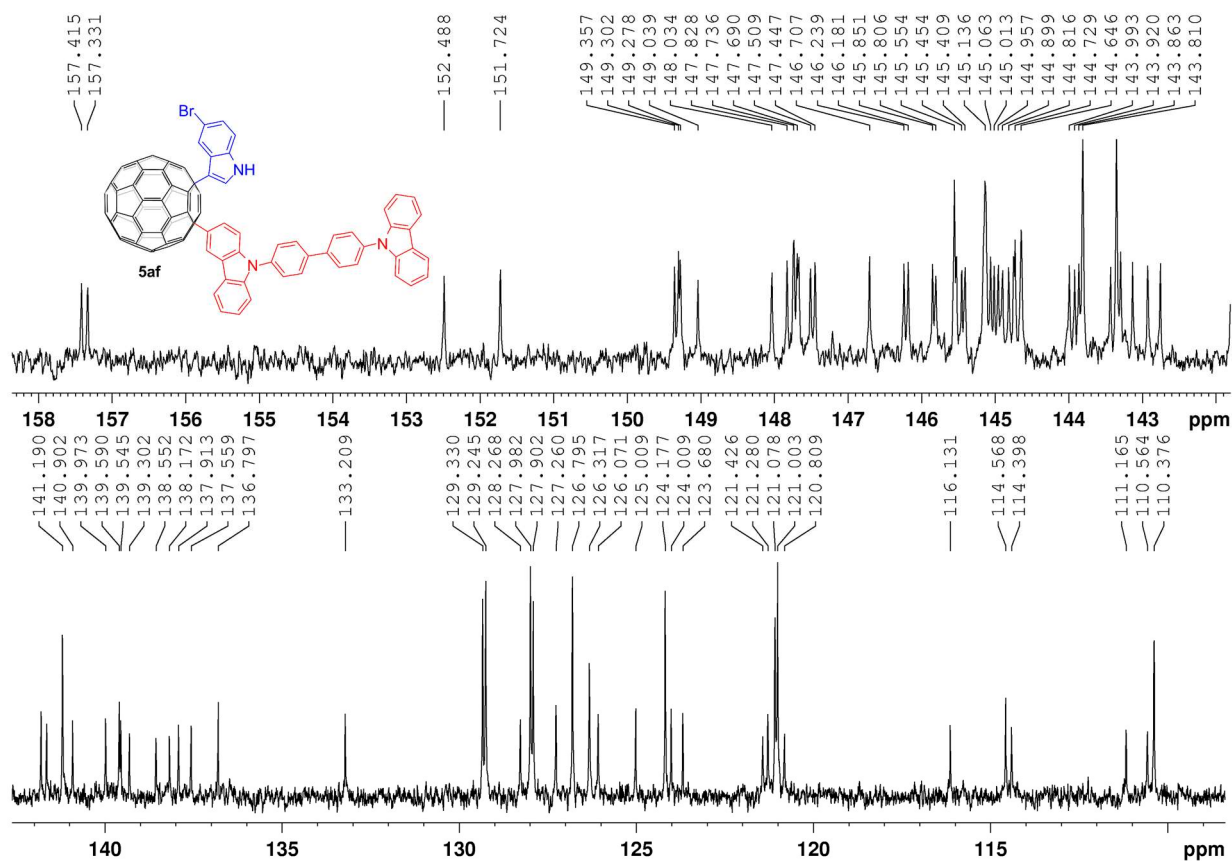

### $^1\text{H}$ NMR (400 MHz, $\text{CS}_2/\text{d}_6\text{-acetone}$ ) of compound 5ag

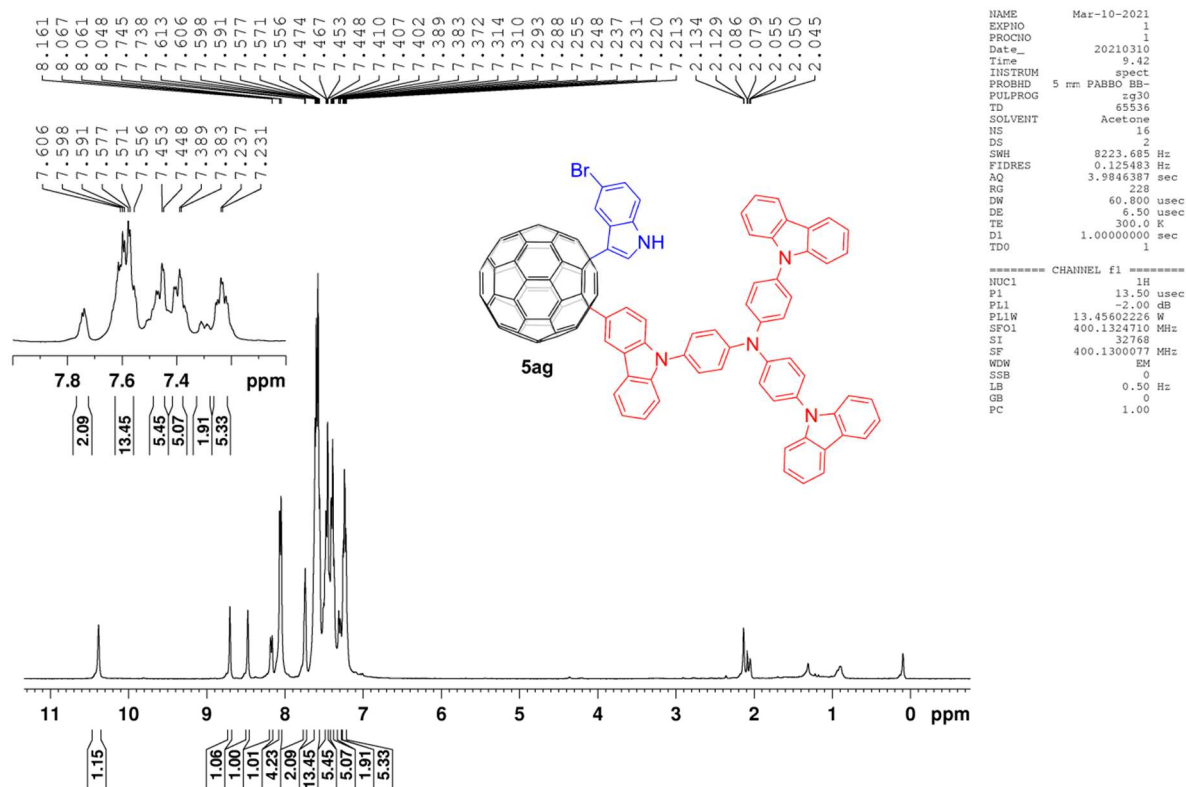

### <sup>13</sup>C NMR (100 MHz, CS<sub>2</sub>/d<sub>6</sub>-acetone) of compound 5ag

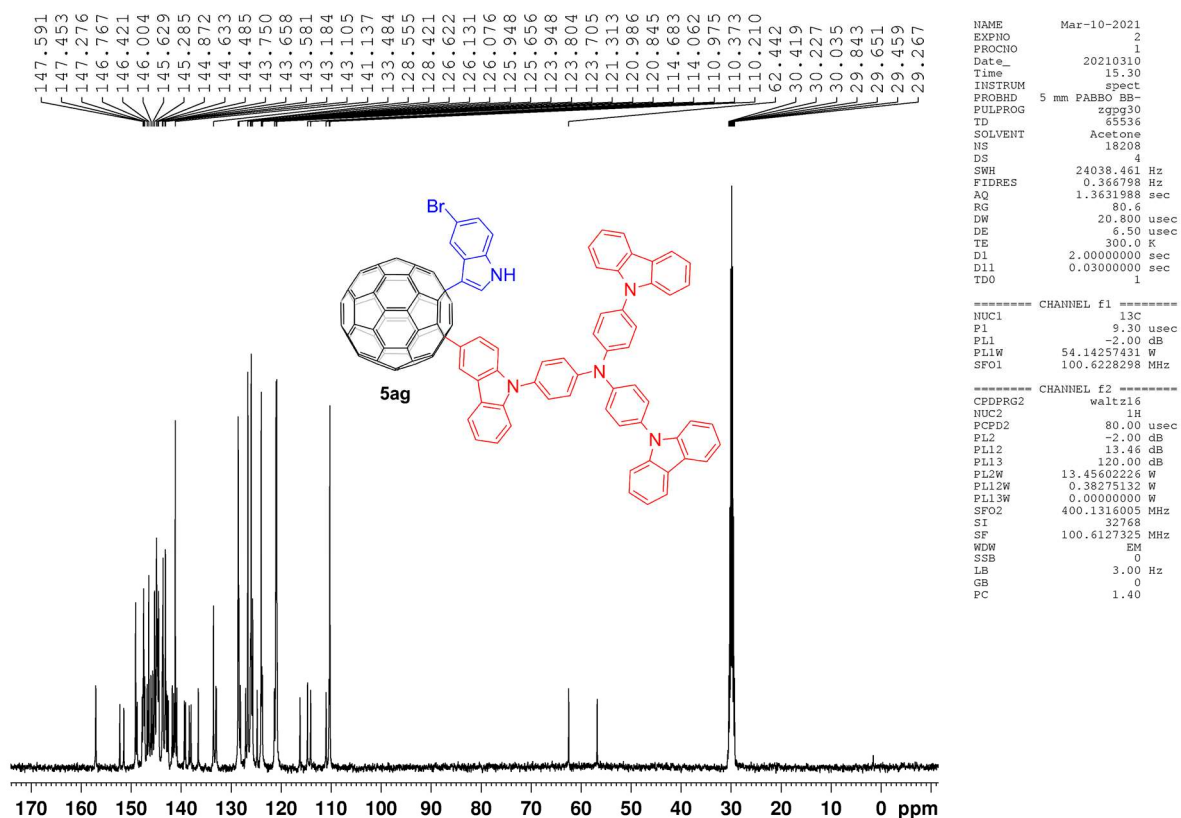

### Expanded <sup>13</sup>C NMR (100 MHz, CS<sub>2</sub>/d<sub>6</sub>-acetone) of compound 5ag

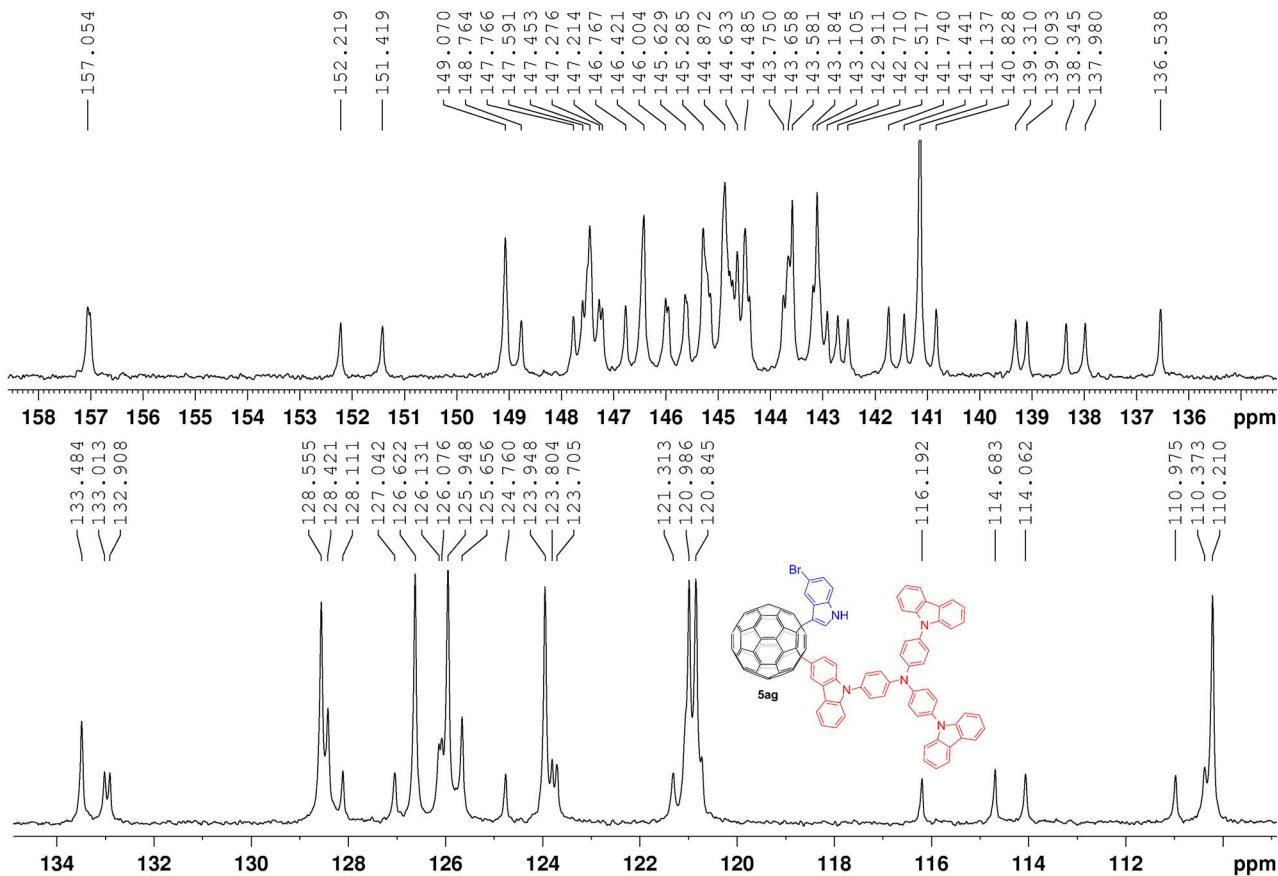

### <sup>1</sup>H NMR (400 MHz, CS<sub>2</sub>/d<sub>6</sub>-acetone) of compound 5fg

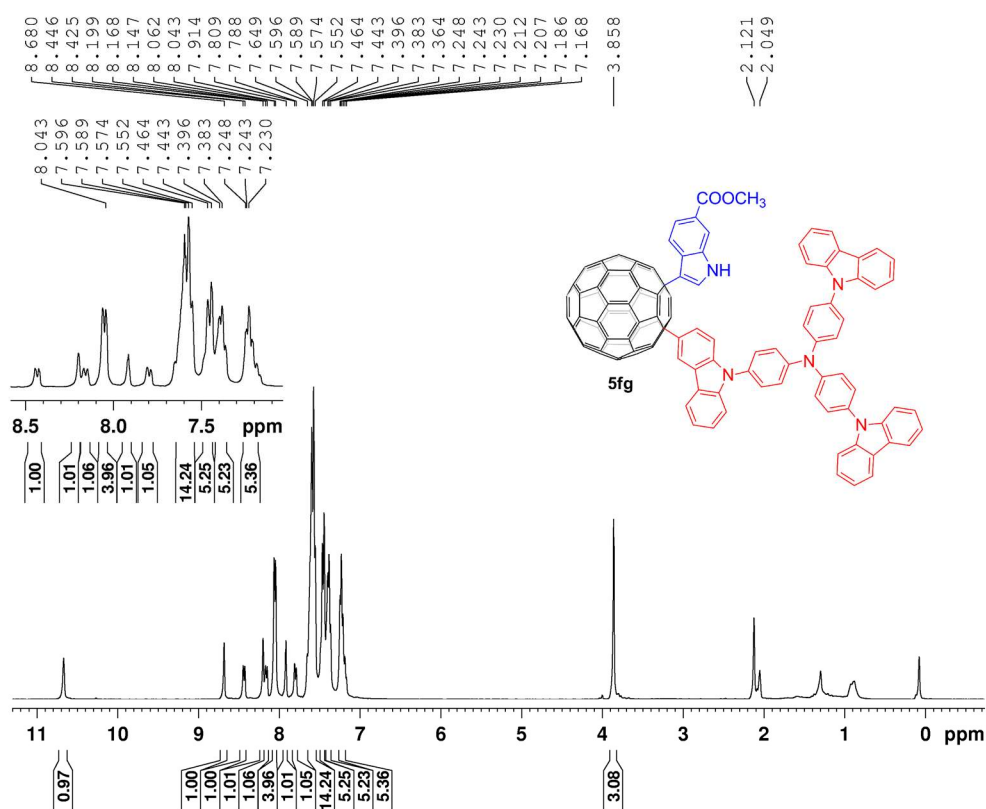

```

NAME      Mar31-2021
EXPNO    1
PROCNO   1
Date_    20210331
Time     10.59
INSTRUM  spect
PROBHD   5 mm PABBO BB-
PULPROG  zg30
TD       65536
SOLVENT  Acetone
NS       16
DS       2
SWH      8223.685 Hz
FIDRES   0.125483 Hz
AQ       3.9846387 sec
RG       362
DW       60.800 usec
DE       6.50 usec
TE       300.0 K
D1       1.0000000 sec
TD0      1
===== CHANNEL f1 =====
NUC1     1H
P1       13.50 usec
PL1      -2.00 dB
PL1W     13.45602226 W
SFO1     400.1324710 MHz
SI       32768
SF       400.1300079 MHz
WDW      EM
SSB      0
LB       1.00 Hz
GB       0
PC       1.00
    
```

### <sup>13</sup>C NMR (100 MHz, CS<sub>2</sub>/d<sub>6</sub>-acetone) of compound 5fg

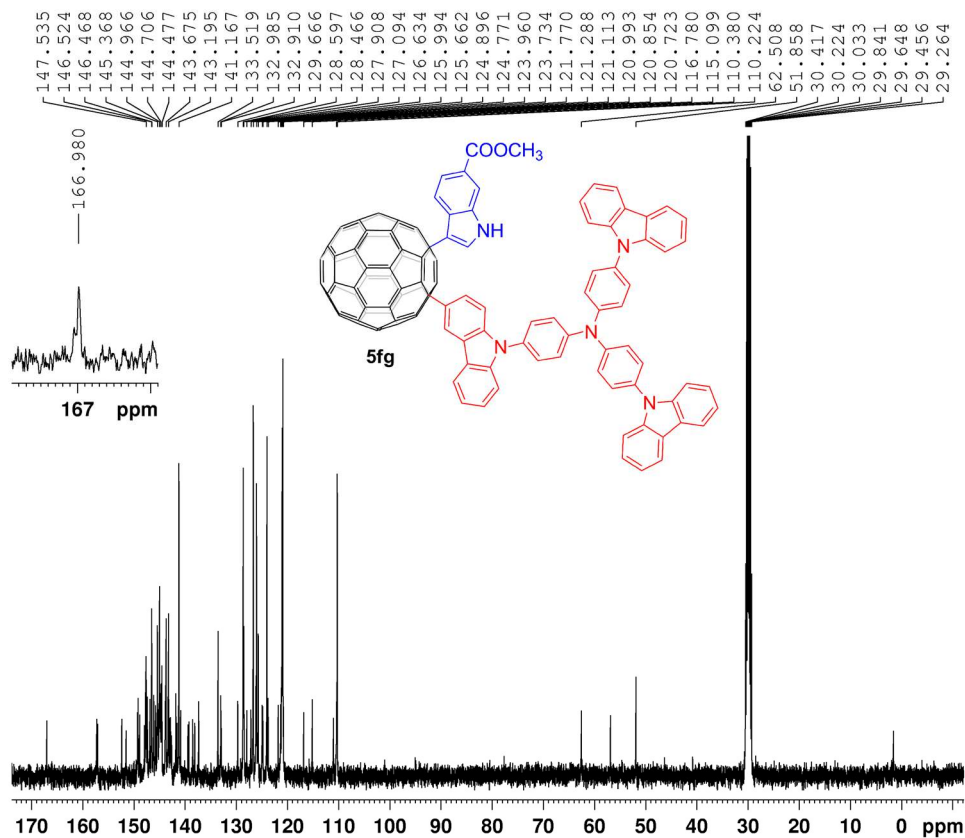

```

NAME      Mar31-2021
EXPNO    2
PROCNO   1
Date_    20210401
Time     11.17
INSTRUM  spect
PROBHD   5 mm PABBO BB-
PULPROG  zgpg30
TD       65536
SOLVENT  Acetone
NS       20504
DS       4
SWH      24038.461 Hz
FIDRES   0.366798 Hz
AQ       1.3631988 sec
RG       80.6
DW       20.800 usec
DE       6.50 usec
TE       300.0 K
D1       2.0000000 sec
D11      0.03000000 sec
TD0      1
===== CHANNEL f1 =====
NUC1     13C
P1       9.30 usec
PL1      -2.00 dB
PL1W     54.14257431 W
SFO1     100.6228298 MHz
===== CHANNEL f2 =====
CPDPRG2  waltz16
NUC2     1H
PCPD2    80.00 usec
PL2      -2.00 dB
PL12     13.46 dB
PL13     120.00 dB
PL2W     13.45602226 W
PL12W    0.38275132 W
PL13W    0.00000000 W
SFO2     400.1316005 MHz
SI       32768
SF       100.6127287 MHz
WDW      EM
SSB      0
LB       1.00 Hz
GB       0
PC       1.40
    
```

Expanded <sup>13</sup>C NMR (100 MHz, CS<sub>2</sub>/d<sub>6</sub>-acetone) of compound 5fg

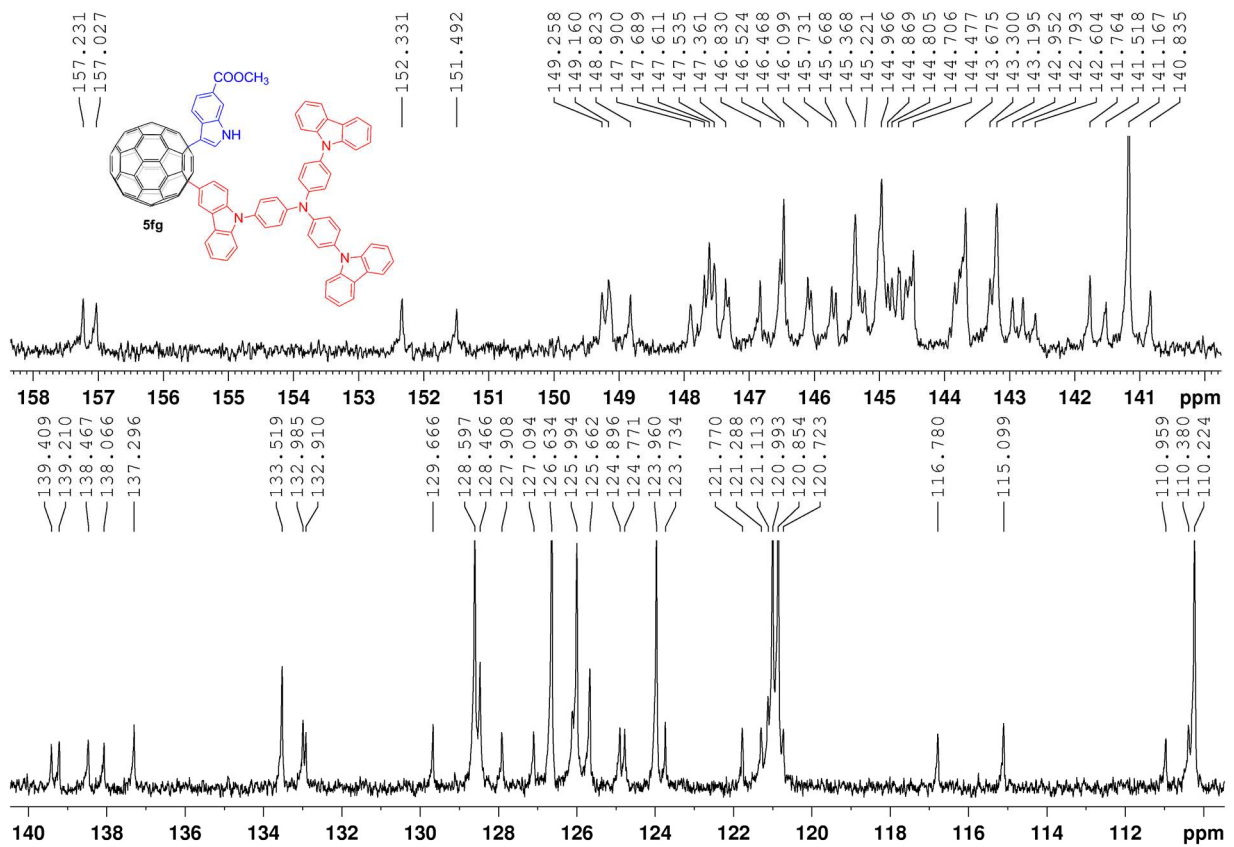

<sup>1</sup>H NMR (400 MHz, CS<sub>2</sub>/d<sub>6</sub>-acetone) of compound 6

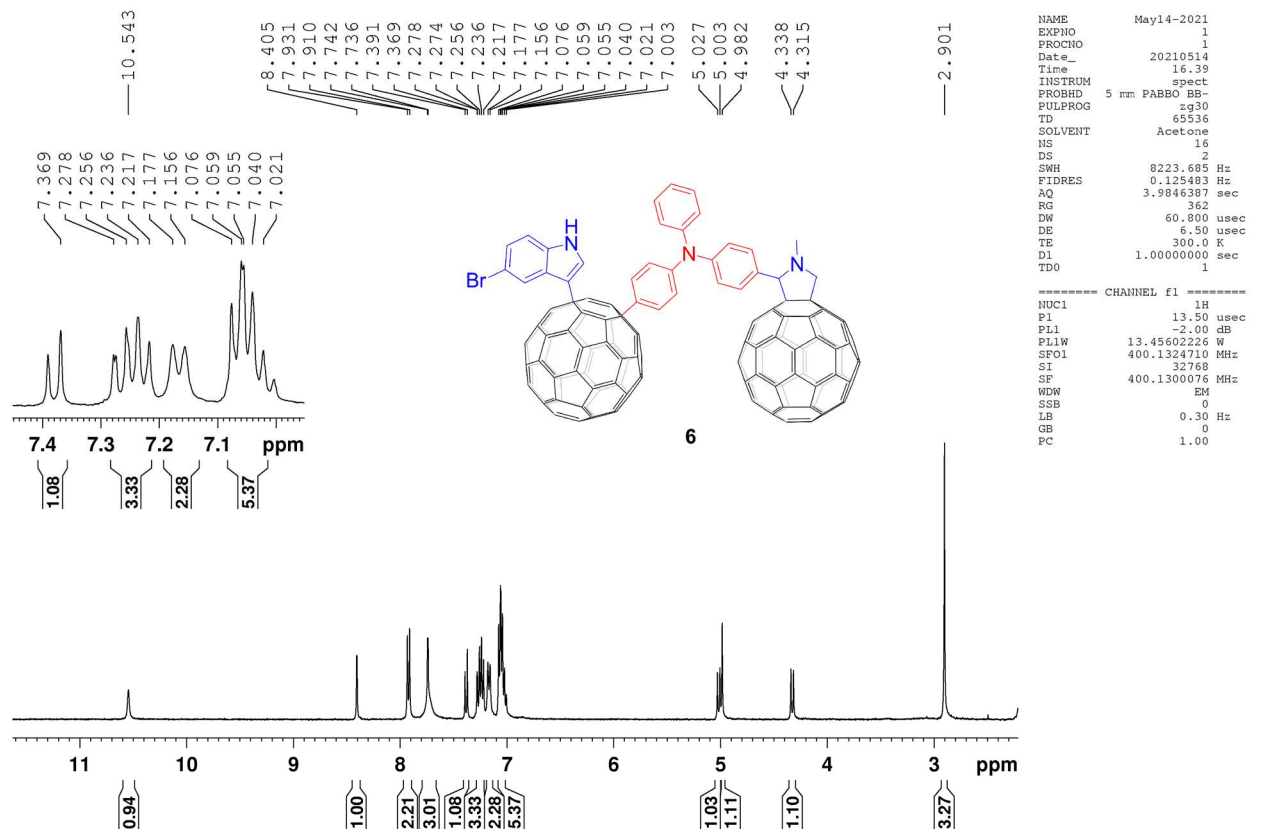



### <sup>13</sup>C NMR (100 MHz, CS<sub>2</sub>/d<sub>6</sub>-acetone) of compound 6

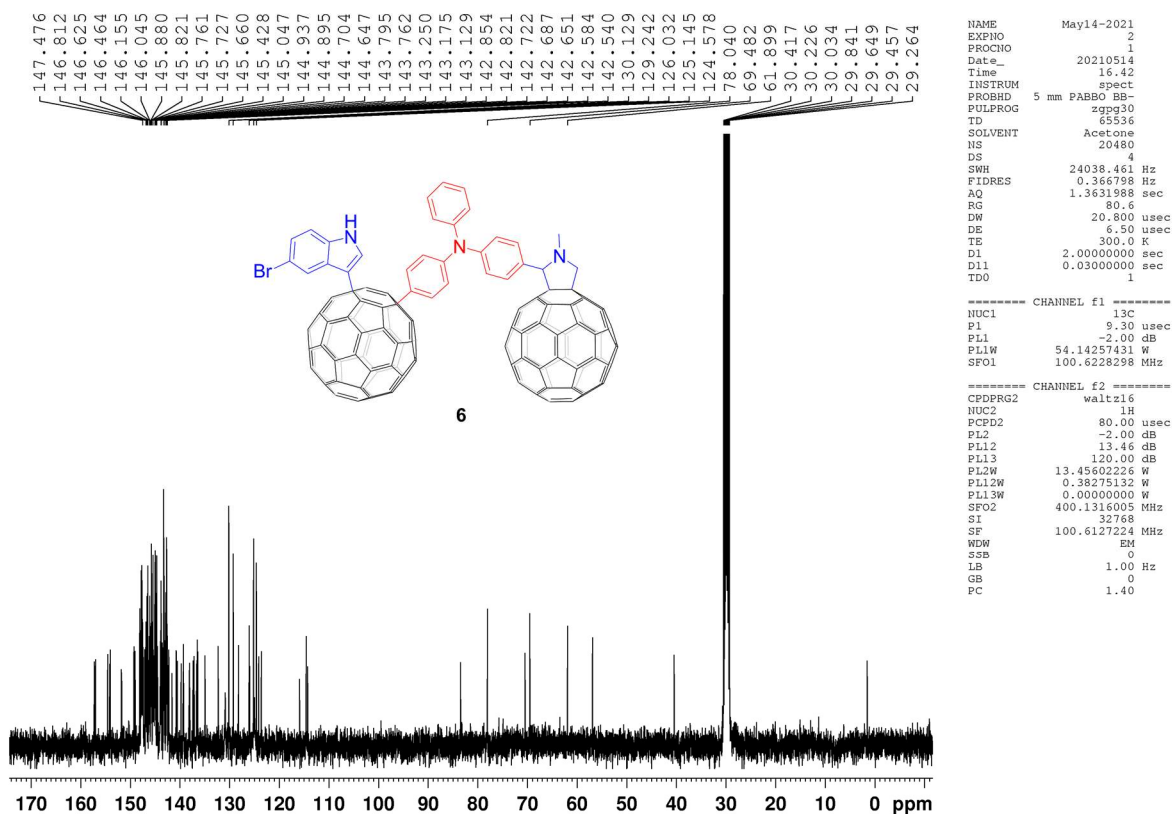

### Expanded <sup>13</sup>C NMR (100 MHz, CS<sub>2</sub>/d<sub>6</sub>-acetone) of compound 6

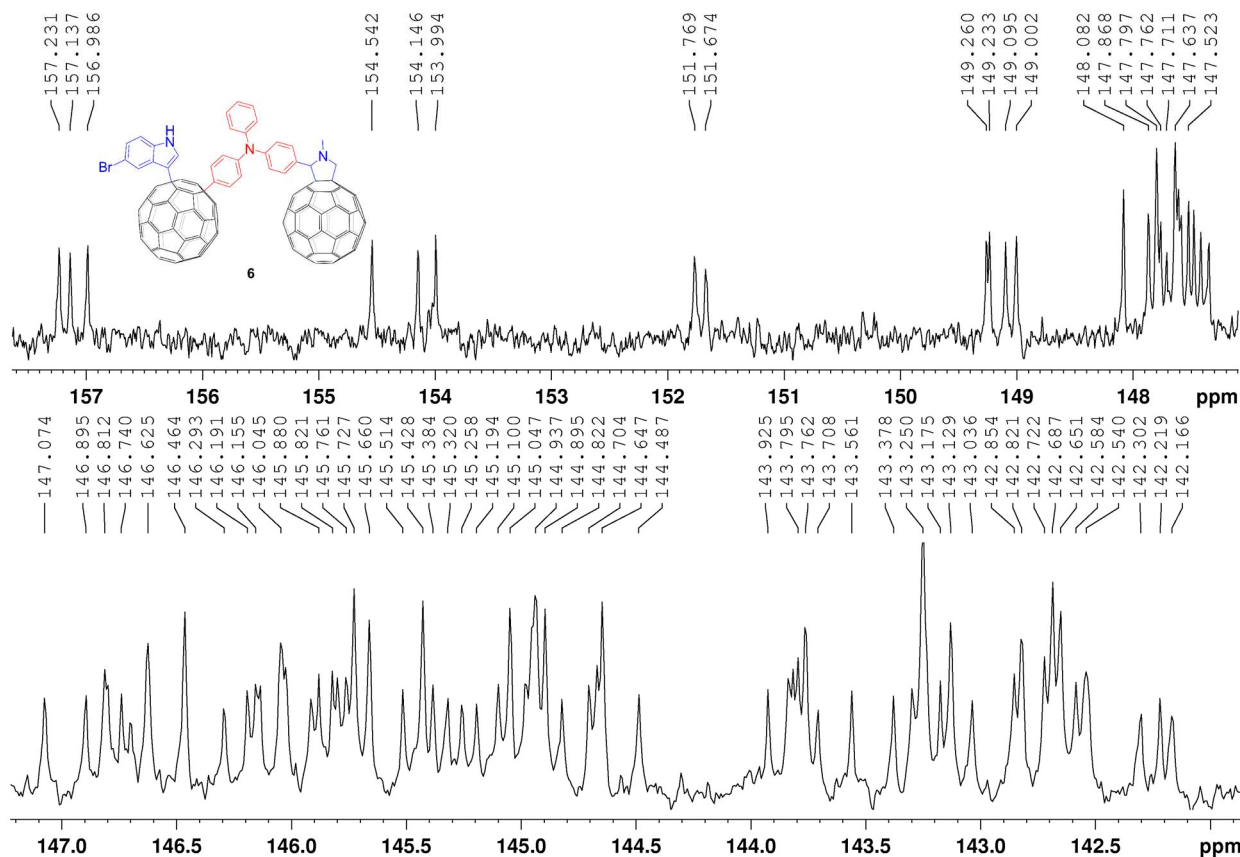

### Expanded $^{13}\text{C}$ NMR (100 MHz, $\text{CS}_2/\text{d}_6\text{-acetone}$ ) of compound **6**

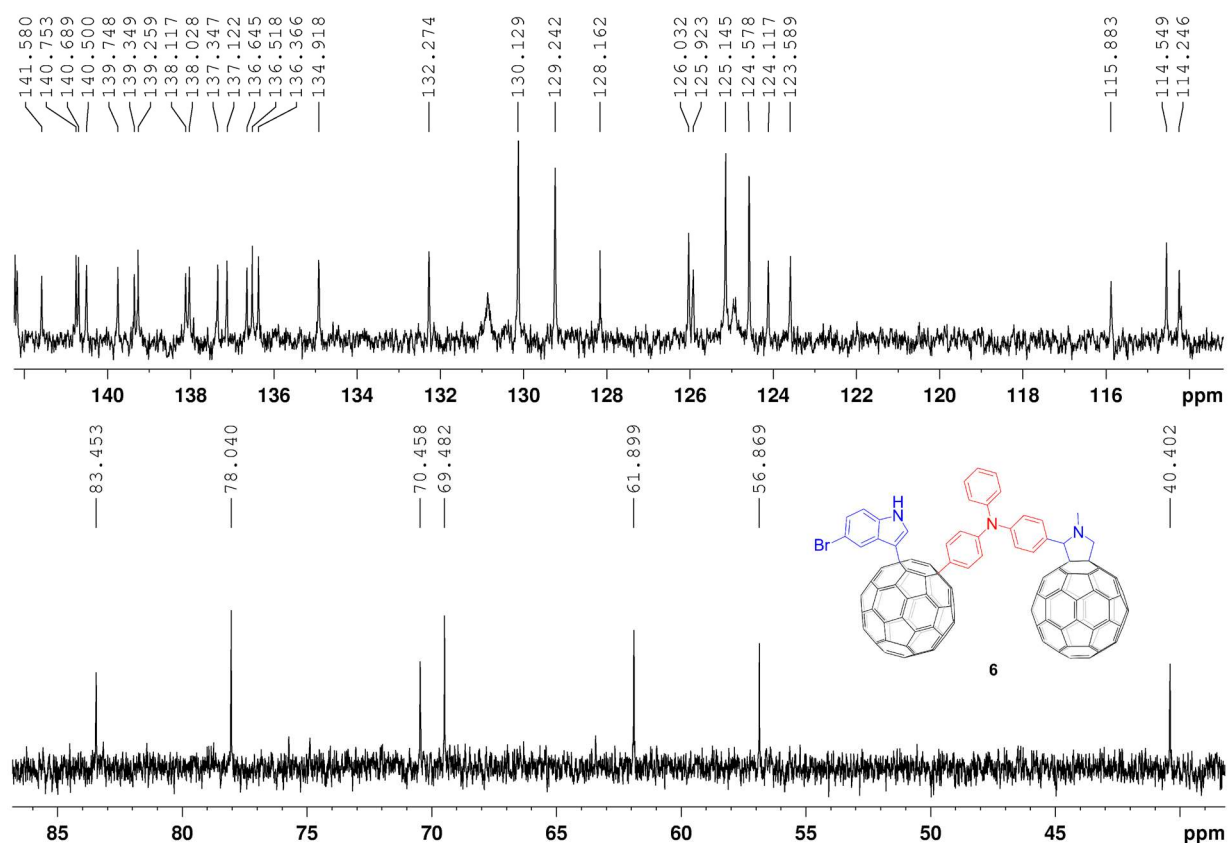

### 4. Single-Crystal X-Ray Crystallography of **3aa**, **3ca**, **5ad** and **5af**

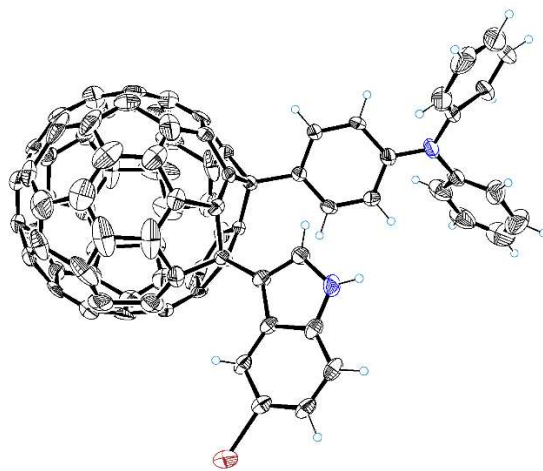

**Figure S2** ORTEP diagrams of **3aa** with 30% thermal ellipsoids. The solvent molecules are omitted for clarity.

Black block crystals of **3aa** suitable for X-ray diffraction were obtained from slow evaporation of its solution in a mixture of  $\text{CS}_2$  and toluene at room temperature. Single-crystal X-ray diffraction data were collected on a diffractometer (DECTRIS PILATUS 300K, STOE & Cie GmbH) equipped with a CCD area detector using

graphite-monochromated Cu K $\alpha$  radiation ( $\lambda = 1.54184 \text{ \AA}$ ) in the scan range  $8.90^\circ < 2\theta < 140.22^\circ$ . The structure was solved with direct methods using SHELXS-97 and refined with full-matrix least-squares refinement using the SHELXL-97 program within OLEX2. Crystallographic data have been deposited in the Cambridge Crystallographic Data Centre as deposition number CCDC 2080448.

| <b>Table S1 Crystal data and structure refinement for 3aa</b> |                                                                |
|---------------------------------------------------------------|----------------------------------------------------------------|
| Identification code                                           | 3aa                                                            |
| Empirical formula                                             | C <sub>86</sub> H <sub>19</sub> BrN <sub>2</sub>               |
| Formula weight                                                | 1159.94                                                        |
| Temperature/K                                                 | 293(2)                                                         |
| Crystal system                                                | orthorhombic                                                   |
| Space group                                                   | P2 <sub>1</sub> 2 <sub>1</sub> 2 <sub>1</sub>                  |
| a/Å                                                           | 10.4943(4)                                                     |
| b/Å                                                           | 16.3104(4)                                                     |
| c/Å                                                           | 34.6451(9)                                                     |
| $\alpha/^\circ$                                               | 90                                                             |
| $\beta/^\circ$                                                | 90                                                             |
| $\gamma/^\circ$                                               | 90                                                             |
| Volume/Å <sup>3</sup>                                         | 5930.1(3)                                                      |
| Z                                                             | 4                                                              |
| $\rho_{\text{calc}}/\text{cm}^3$                              | 1.299                                                          |
| $\mu/\text{mm}^{-1}$                                          | 1.342                                                          |
| F(000)                                                        | 2336.0                                                         |
| Crystal size/mm <sup>3</sup>                                  | 0.28 × 0.25 × 0.16                                             |
| Radiation                                                     | CuK $\alpha$ ( $\lambda = 1.54186$ )                           |
| 2 $\theta$ range for data collection/ $^\circ$                | 12.624 to 139.126                                              |
| Index ranges                                                  | -12 ≤ h ≤ 10, -19 ≤ k ≤ 19, -41 ≤ l ≤ 20                       |
| Reflections collected                                         | 21649                                                          |
| Independent reflections                                       | 10685 [R <sub>int</sub> = 0.0274, R <sub>sigma</sub> = 0.0320] |
| Data/restraints/parameters                                    | 10685/1/780                                                    |
| Goodness-of-fit on F <sup>2</sup>                             | 1.078                                                          |
| Final R indexes [ $l > 2\sigma(l)$ ]                          | R <sub>1</sub> = 0.0802, wR <sub>2</sub> = 0.2334              |
| Final R indexes [all data]                                    | R <sub>1</sub> = 0.0900, wR <sub>2</sub> = 0.2504              |
| Largest diff. peak/hole / e Å <sup>-3</sup>                   | 0.88/-0.60                                                     |
| Flack parameter                                               | 0.030(14)                                                      |

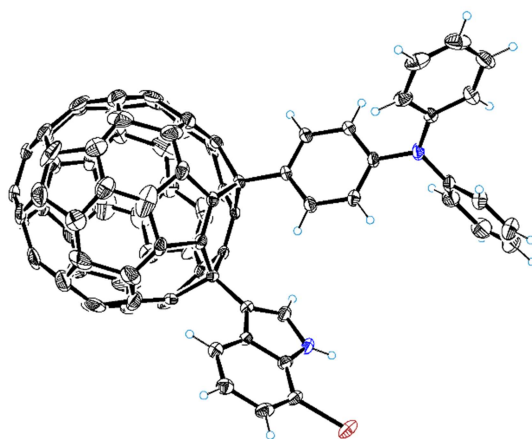

**Figure S3** ORTEP diagrams of **3ca** with 30% thermal ellipsoids. The solvent molecules are omitted for clarity.

Black block crystals of **3ca** suitable for X-ray diffraction were obtained from slow evaporation of its solution in a mixture of CS<sub>2</sub> and isopropyl ether at room temperature. Single-crystal X-ray diffraction data were collected on a diffractometer (DECTRIS PILATUS 300K, STOE & Cie GmbH) equipped with a CCD area detector using graphite-monochromated Cu K $\alpha$  radiation ( $\lambda = 1.54184 \text{ \AA}$ ) in the scan range  $8.90^\circ < 2\theta < 140.22^\circ$ . The structure was solved with direct methods using SHELXS-97 and refined with full-matrix least-squares refinement using the SHELXL-97 program within OLEX2. Crystallographic data have been deposited in the Cambridge Crystallographic Data Centre as deposition number CCDC 2080456.

| <b>Table S2 Crystal data and structure refinement for 3ca</b> |                                                    |
|---------------------------------------------------------------|----------------------------------------------------|
| Identification code                                           | 3ca                                                |
| Empirical formula                                             | C <sub>92</sub> H <sub>33</sub> BrN <sub>2</sub> O |
| Formula weight                                                | 1262.11                                            |
| Temperature/K                                                 | 293(2)                                             |
| Crystal system                                                | monoclinic                                         |
| Space group                                                   | P2 <sub>1</sub> /c                                 |
| a/Å                                                           | 15.1762(2)                                         |
| b/Å                                                           | 23.7457(3)                                         |
| c/Å                                                           | 16.64667(19)                                       |
| $\alpha/^\circ$                                               | 90                                                 |
| $\beta/^\circ$                                                | 115.1948(15)                                       |
| $\gamma/^\circ$                                               | 90                                                 |
| Volume/Å <sup>3</sup>                                         | 5428.24(13)                                        |
| Z                                                             | 4                                                  |
| $\rho_{\text{calc}}/\text{cm}^3$                              | 1.544                                              |
| $\mu/\text{mm}^{-1}$                                          | 1.528                                              |

|                                             |                                                               |
|---------------------------------------------|---------------------------------------------------------------|
| F(000)                                      | 2568.0                                                        |
| Crystal size/mm <sup>3</sup>                | 0.3 × 0.2 × 0.1                                               |
| Radiation                                   | CuK $\alpha$ ( $\lambda$ = 1.54184)                           |
| 2 $\theta$ range for data collection/°      | 6.95 to 140.086                                               |
| Index ranges                                | -12 ≤ h ≤ 18, -26 ≤ k ≤ 28, -20 ≤ l ≤ 14                      |
| Reflections collected                       | 21686                                                         |
| Independent reflections                     | 9852 [R <sub>int</sub> = 0.0247, R <sub>sigma</sub> = 0.0293] |
| Data/restraints/parameters                  | 9852/31/857                                                   |
| Goodness-of-fit on F <sup>2</sup>           | 1.056                                                         |
| Final R indexes [I ≥ 2 $\sigma$ (I)]        | R <sub>1</sub> = 0.0963, wR <sub>2</sub> = 0.2625             |
| Final R indexes [all data]                  | R <sub>1</sub> = 0.1056, wR <sub>2</sub> = 0.2733             |
| Largest diff. peak/hole / e Å <sup>-3</sup> | 1.59/-0.88                                                    |

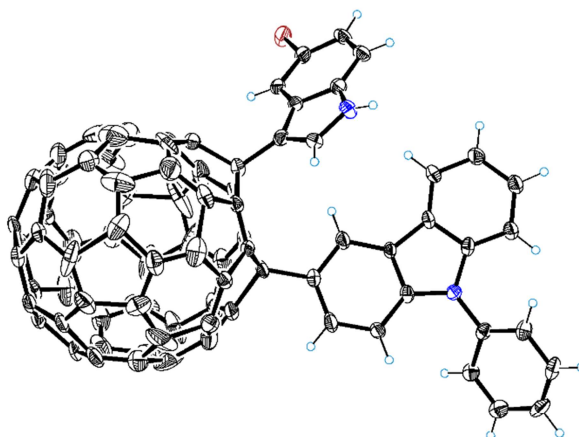

**Figure S4** ORTEP diagrams of **5ad** with 30% thermal ellipsoids. The solvent molecules are omitted for clarity.

Black block crystals of **5ad** suitable for X-ray diffraction were obtained from slow evaporation of its solution in a mixture of CS<sub>2</sub> and *n*-hexane at room temperature. Single-crystal X-ray diffraction data were collected on a diffractometer (DECTRIS PILATUS 300K, STOE & Cie GmbH) equipped with a CCD area detector using graphite-monochromated Cu K $\alpha$  radiation ( $\lambda$  = 1.54184 Å) in the scan range 8.90° < 2 $\theta$  < 140.22°. The structure was solved with direct methods using SHELXS-97 and refined with full-matrix least-squares refinement using the SHELXL-97 program within OLEX2. Crystallographic data have been deposited in the Cambridge Crystallographic Data Centre as deposition number CCDC 2080460.

| <b>Table S3 Crystal data and structure refinement for 5ad</b> |                                                                                |
|---------------------------------------------------------------|--------------------------------------------------------------------------------|
| Identification code                                           | 5ad                                                                            |
| Empirical formula                                             | C <sub>173</sub> H <sub>34</sub> Br <sub>2</sub> N <sub>4</sub> S <sub>2</sub> |
| Formula weight                                                | 2391.98                                                                        |
| Temperature/K                                                 | 293(2)                                                                         |
| Crystal system                                                | triclinic                                                                      |
| Space group                                                   | P-1                                                                            |
| a/Å                                                           | 13.8089(3)                                                                     |
| b/Å                                                           | 19.3737(5)                                                                     |
| c/Å                                                           | 23.3923(6)                                                                     |
| α/°                                                           | 66.123(2)                                                                      |
| β/°                                                           | 79.414(2)                                                                      |
| γ/°                                                           | 70.079(2)                                                                      |
| Volume/Å <sup>3</sup>                                         | 5372.5(3)                                                                      |
| Z                                                             | 2                                                                              |
| ρ <sub>calc</sub> /cm <sup>3</sup>                            | 1.479                                                                          |
| μ/mm <sup>-1</sup>                                            | 1.854                                                                          |
| F(000)                                                        | 2404.0                                                                         |
| Crystal size/mm <sup>3</sup>                                  | 0.23 × 0.19 × 0.14                                                             |
| Radiation                                                     | CuKα (λ = 1.54186)                                                             |
| 2θ range for data collection/°                                | 7.126 to 139.408                                                               |
| Index ranges                                                  | -14 ≤ h ≤ 16, -19 ≤ k ≤ 23, -12 ≤ l ≤ 27                                       |
| Reflections collected                                         | 51212                                                                          |
| Independent reflections                                       | 19362 [R <sub>int</sub> = 0.0221, R <sub>sigma</sub> = 0.0292]                 |
| Data/restraints/parameters                                    | 19362/26/1630                                                                  |
| Goodness-of-fit on F <sup>2</sup>                             | 1.047                                                                          |
| Final R indexes [I > 2σ (I)]                                  | R <sub>1</sub> = 0.0749, wR <sub>2</sub> = 0.1994                              |
| Final R indexes [all data]                                    | R <sub>1</sub> = 0.0938, wR <sub>2</sub> = 0.2201                              |
| Largest diff. peak/hole / e Å <sup>-3</sup>                   | 1.10/-1.00                                                                     |

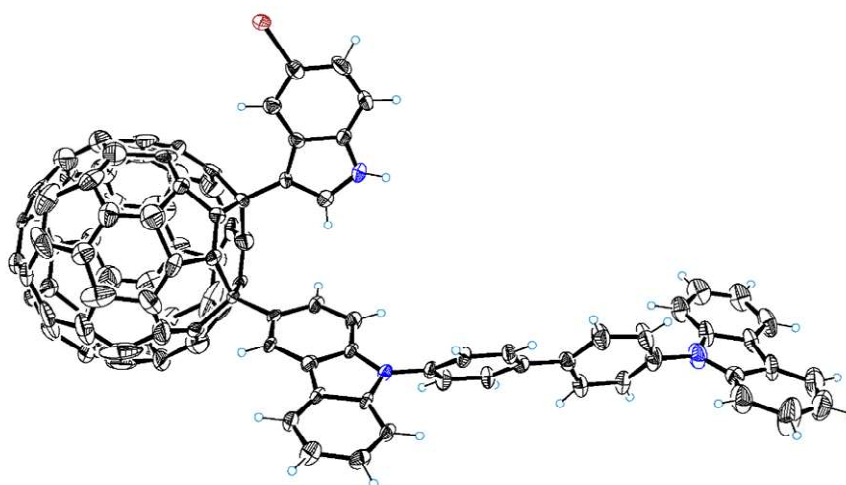

**Figure S5** ORTEP diagrams of **5af** with 30% thermal ellipsoids. The solvent molecules are omitted for clarity.

Black block crystals of **5af** suitable for X-ray diffraction were obtained from slow evaporation of its solution in a mixture of CS<sub>2</sub> and toluene at room temperature. Single-crystal X-ray diffraction data were collected on a diffractometer (DECTRIS PILATUS 300K, STOE & Cie GmbH) equipped with a CCD area detector using graphite-monochromated Cu K $\alpha$  radiation ( $\lambda = 1.54184 \text{ \AA}$ ) in the scan range  $8.90^\circ < 2\theta < 140.22^\circ$ . The structure was solved with direct methods using SHELXS-97 and refined with full-matrix least-squares refinement using the SHELXL-97 program within OLEX2. Crystallographic data have been deposited in the Cambridge Crystallographic Data Centre as deposition number CCDC 2080463.

| <b>Table S4 Crystal data and structure refinement for 5af</b> |                                                   |
|---------------------------------------------------------------|---------------------------------------------------|
| Identification code                                           | 5af                                               |
| Empirical formula                                             | C <sub>104</sub> H <sub>28</sub> BrN <sub>3</sub> |
| Formula weight                                                | 1399.20                                           |
| Temperature/K                                                 | 298                                               |
| Crystal system                                                | triclinic                                         |
| Space group                                                   | P-1                                               |
| a/Å                                                           | 13.1196(10)                                       |
| b/Å                                                           | 17.4041(17)                                       |
| c/Å                                                           | 17.8966(15)                                       |
| $\alpha/^\circ$                                               | 95.025(7)                                         |

|                                                |                                                                   |
|------------------------------------------------|-------------------------------------------------------------------|
| $\beta/^\circ$                                 | 99.017(6)                                                         |
| $\gamma/^\circ$                                | 100.517(7)                                                        |
| Volume/ $\text{\AA}^3$                         | 3939.6(6)                                                         |
| Z                                              | 2                                                                 |
| $\rho_{\text{calc}}/\text{g/cm}^3$             | 1.180                                                             |
| $\mu/\text{mm}^{-1}$                           | 1.101                                                             |
| F(000)                                         | 1416.0                                                            |
| Crystal size/ $\text{mm}^3$                    | 0.20 × 0.15 × 0.13                                                |
| Radiation                                      | CuK $\alpha$ ( $\lambda = 1.54186$ )                              |
| 2 $\theta$ range for data collection/ $^\circ$ | 12.402 to 136.718                                                 |
| Index ranges                                   | -15 ≤ h ≤ 15, -20 ≤ k ≤ 6, -20 ≤ l ≤ 21                           |
| Reflections collected                          | 29646                                                             |
| Independent reflections                        | 13723 [ $R_{\text{int}} = 0.0341$ , $R_{\text{sigma}} = 0.0312$ ] |
| Data/restraints/parameters                     | 13723/56/521                                                      |
| Goodness-of-fit on $F^2$                       | 1.215                                                             |
| Final R indexes [ $ I  > 2\sigma(I)$ ]         | $R_1 = 0.1089$ , $wR_2 = 0.2642$                                  |
| Final R indexes [all data]                     | $R_1 = 0.1280$ , $wR_2 = 0.2920$                                  |
| Largest diff. peak/hole / $e \text{\AA}^{-3}$  | 1.04/-0.42                                                        |

## 5. Optimization of the Reaction Conditions

The three-component cross-coupling of 5-bromoindole (**1a**) with  $C_{60}$  and triphenylamine (**2a**) was selected as a model reaction for the optimization of reaction conditions. On the basis of our previous research work, which has realized the KO<sup>t</sup>Bu promoted C3-coupling of indole with  $C_{60}$ , we commenced our study by examining whether the following regioselective C-C cross-coupling between triphenylamine and  $C_{60}$  could be achieved in one-pot (Table S5). To our delight, the desired 1,4-adducted indole- $C_{60}$ -TPA compound **3aa** was obtained at 100 °C for 1 hour in 35% yield when **2a** was added with DDQ as the oxidant in the presence of  $CF_3SO_3H$  (Table S5, entry 1). Further condition optimization revealed that increasing the temperature could improved the yield obviously (Table S5, entry 2-5), especially carrying the reaction at 130 °C for 1 hour resulted in raising the yield of **3aa** to 66% (Table S5, entry 5). Then the solvent effect was investigated, and we found that change the ratio of solvents PhCl/DMSO (v/v) from 4:1 to 2:1 or 1:1 could not provide the desired product in superior yields (Table S5, entry 5 vs 6, 7). Different acids, such as  $CF_3COOH$ ,  $CH_3COOH$  and  $H_2SO_4$  were screened (Table S5, entries 8–10). The results revealed that  $CF_3SO_3H$  was an efficient acid for the transformation.



**Table S5. Optimization of Reaction Conditions<sup>a</sup>**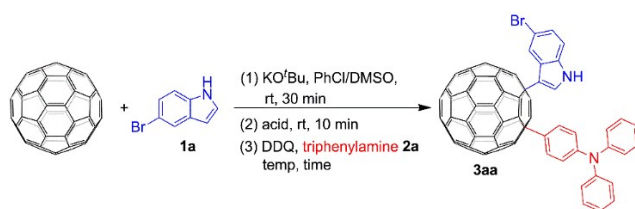

| entry <sup>a</sup> | acid                                 | solvent (v/v) (PhCl/DMSO) | temp <sup>b</sup> (°C) | time (h) | yield (%) <sup>c</sup> |
|--------------------|--------------------------------------|---------------------------|------------------------|----------|------------------------|
| 1                  | CF <sub>3</sub> SO <sub>3</sub> H    | 4:1                       | 100                    | 1        | 35 (44)                |
| 2                  | CF <sub>3</sub> SO <sub>3</sub> H    | 4:1                       | 110                    | 1        | 45 (52)                |
| 3                  | CF <sub>3</sub> SO <sub>3</sub> H    | 4:1                       | 120                    | 1        | 54 (70)                |
| 4                  | CF <sub>3</sub> SO <sub>3</sub> H    | 4:1                       | 120                    | 2        | 63 (70)                |
| <b>5</b>           | <b>CF<sub>3</sub>SO<sub>3</sub>H</b> | <b>4:1</b>                | <b>130</b>             | <b>1</b> | <b>66 (77)</b>         |
| 6                  | CF <sub>3</sub> SO <sub>3</sub> H    | 2:1                       | 130                    | 1        | 53 (66)                |
| 7                  | CF <sub>3</sub> SO <sub>3</sub> H    | 1:1                       | 130                    | 1        | 50 (58)                |
| 8                  | CF <sub>3</sub> COOH                 | 4:1                       | 130                    | 1        | 17(20)                 |
| 9                  | CH <sub>3</sub> COOH                 | 4:1                       | 130                    | 1        | trace                  |
| 10                 | H <sub>2</sub> SO <sub>4</sub>       | 4:1                       | 130                    | 1        | 19(23)                 |

<sup>a</sup>Reactions were carried out using C<sub>60</sub> (0.05 mmol, 1 equiv), 5-bromoindole (0.06 mmol, 1.2 equiv), KO<sup>t</sup>Bu (0.1 mmol, 2.0 equiv) in Schlenk tubes under Ar atmosphere for 30 min, and acid (1.0 mmol, 20 equiv) was added and stirred for another 10 min, then DDQ (0.25 mmol, 5 equiv) and triphenylamine (0.25 mmol, 5 equiv) were added and stirred in an oil bath. <sup>b</sup>Oil temperature. <sup>c</sup>Isolated yield by column chromatography. Values in parentheses were based on consumed C<sub>60</sub>.

## 6. UV-vis absorption spectra of compounds 3aa, 3ba, 3fa, 3ga, 3ha, 3ae, 3af, 3ah, 3ai, 3ak, 5ab, 5ad, 5af, 5ag and 5fg

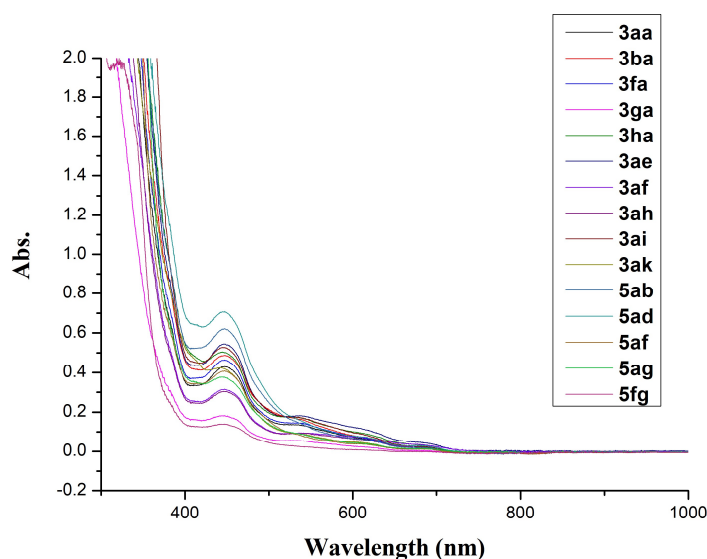**Figure S6** UV-vis spectra of representative TPA/carbazole-fullerene-indole products

## 7. The MALDI-TOF-MS spectra of 3aa-3ak, 5aa-5fg

The MALDI-TOF-MS spectrum of **3aa**

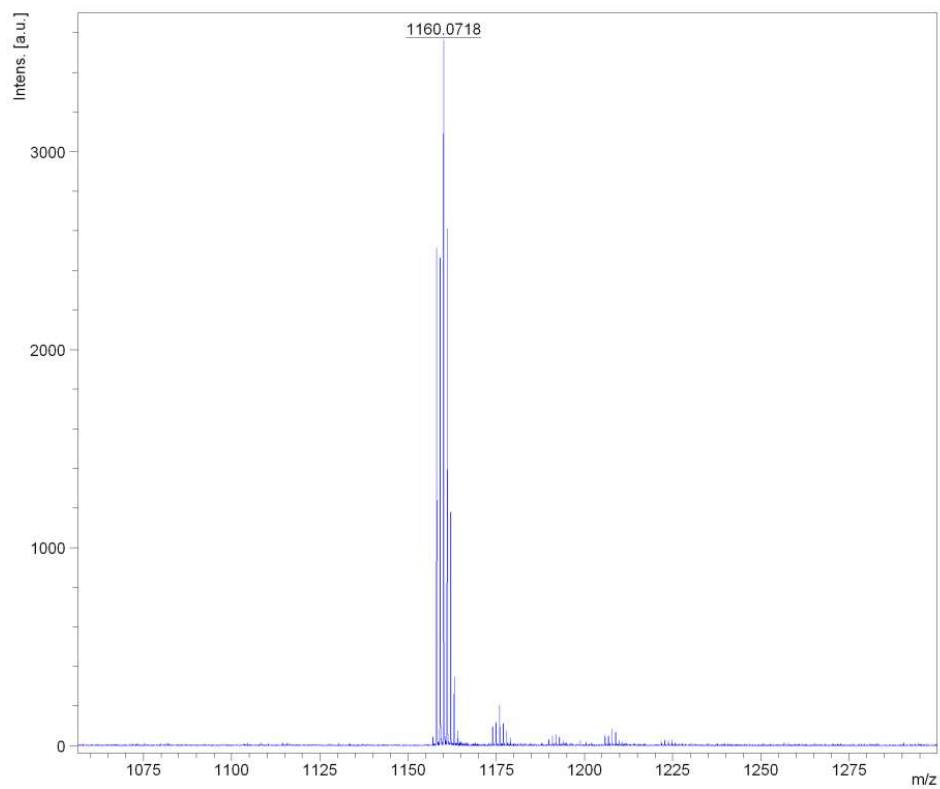

The MALDI-TOF-MS spectrum of **3ba**

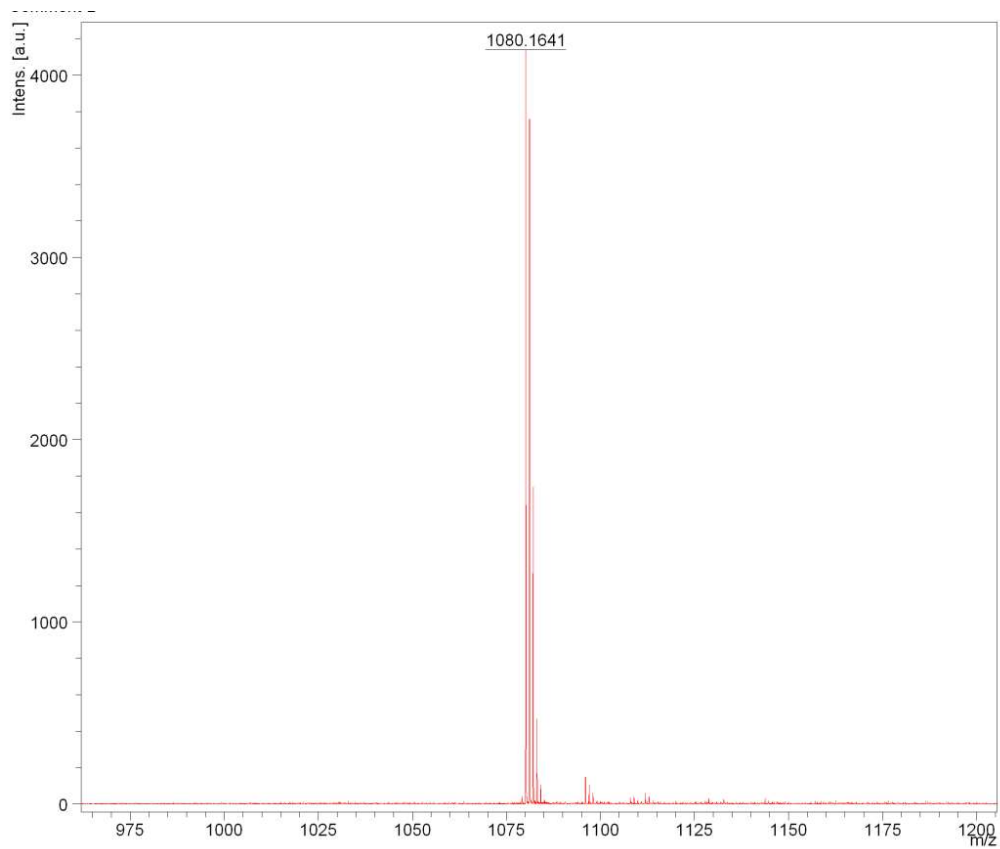

The MALDI-TOF-MS spectrum of **3ca**

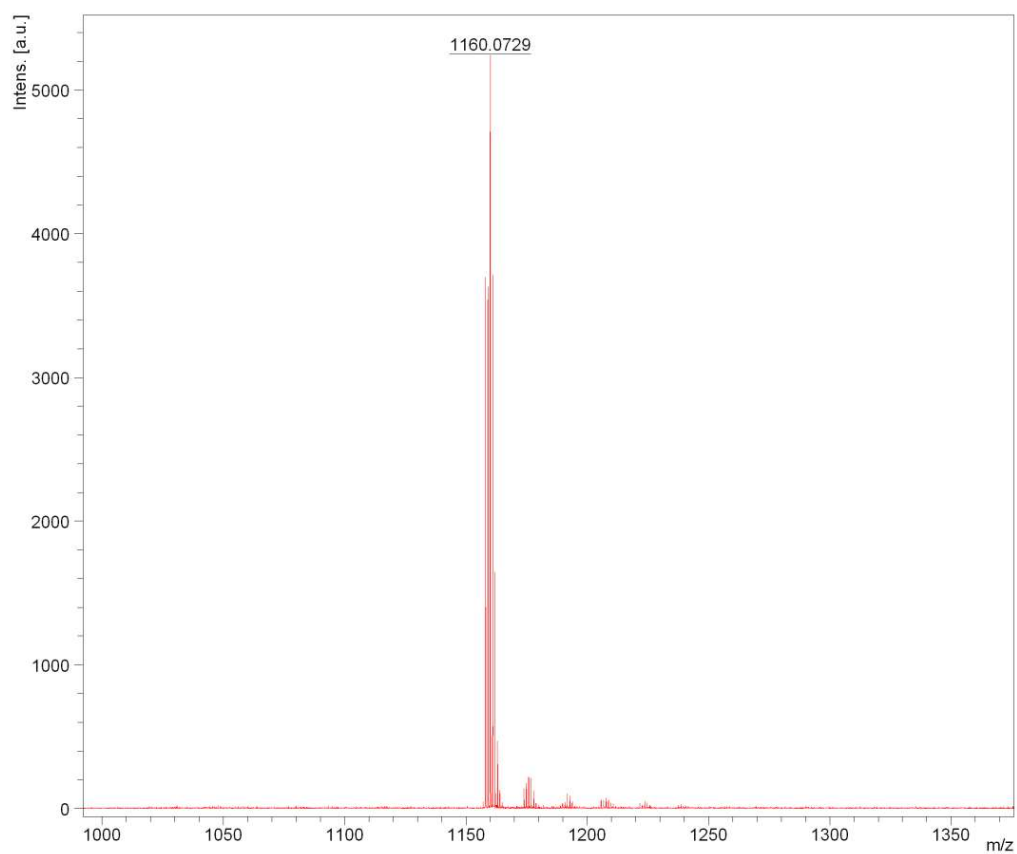

The MALDI-TOF-MS spectrum of **3da**

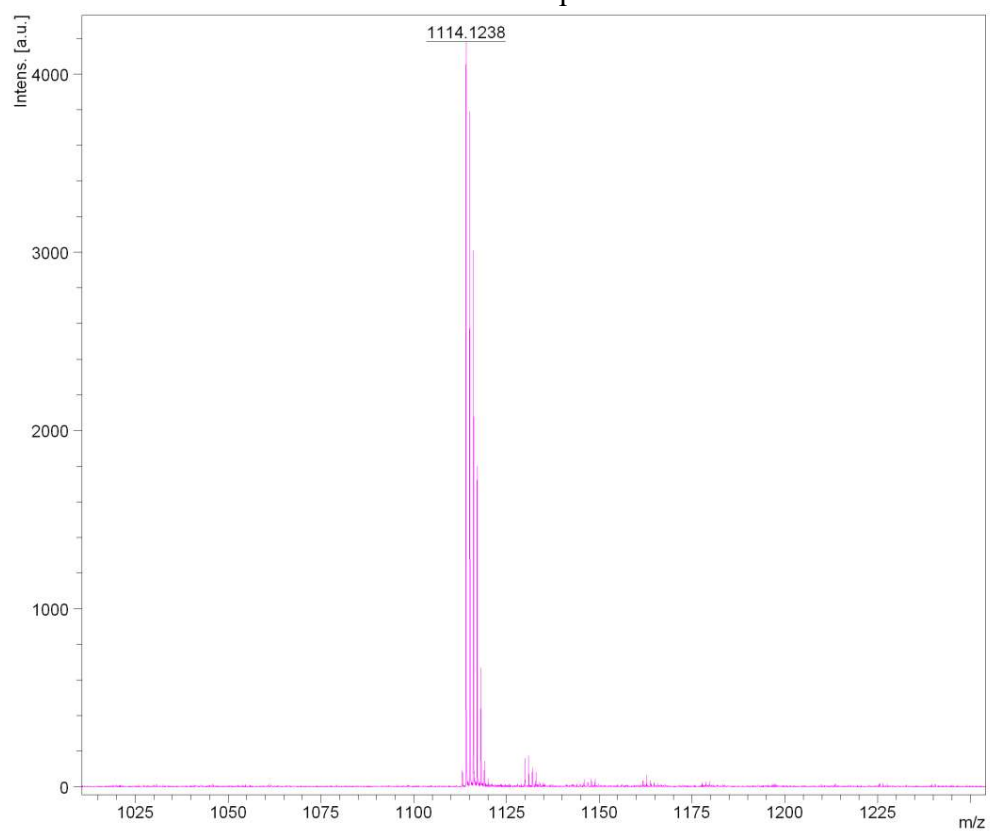

The MALDI-TOF-MS spectrum of **3ea**

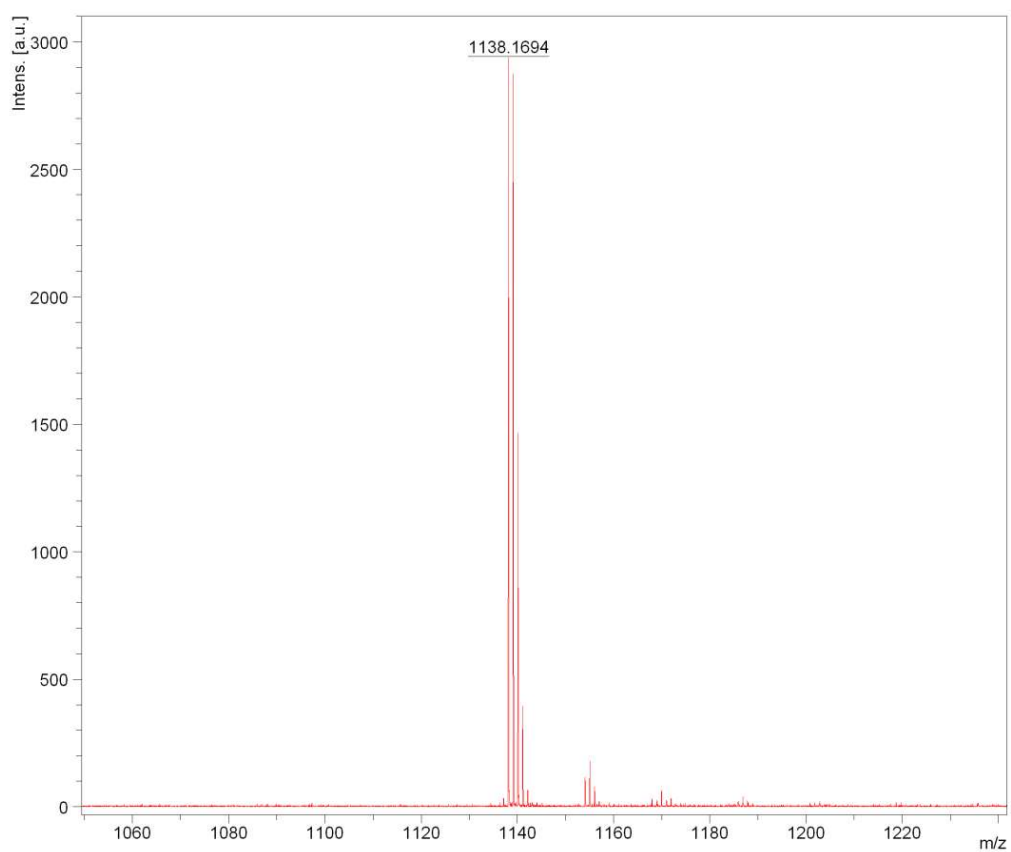

The MALDI-TOF-MS spectrum of **3fa**

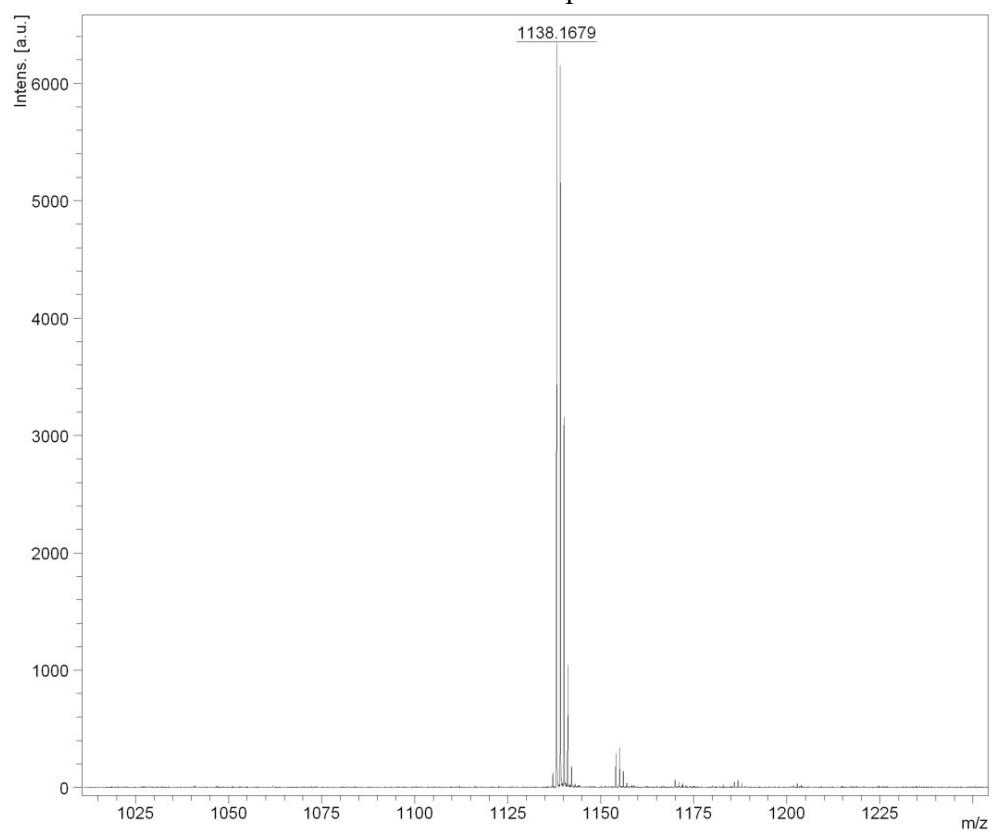

The MALDI-TOF-MS spectrum of **3ga**

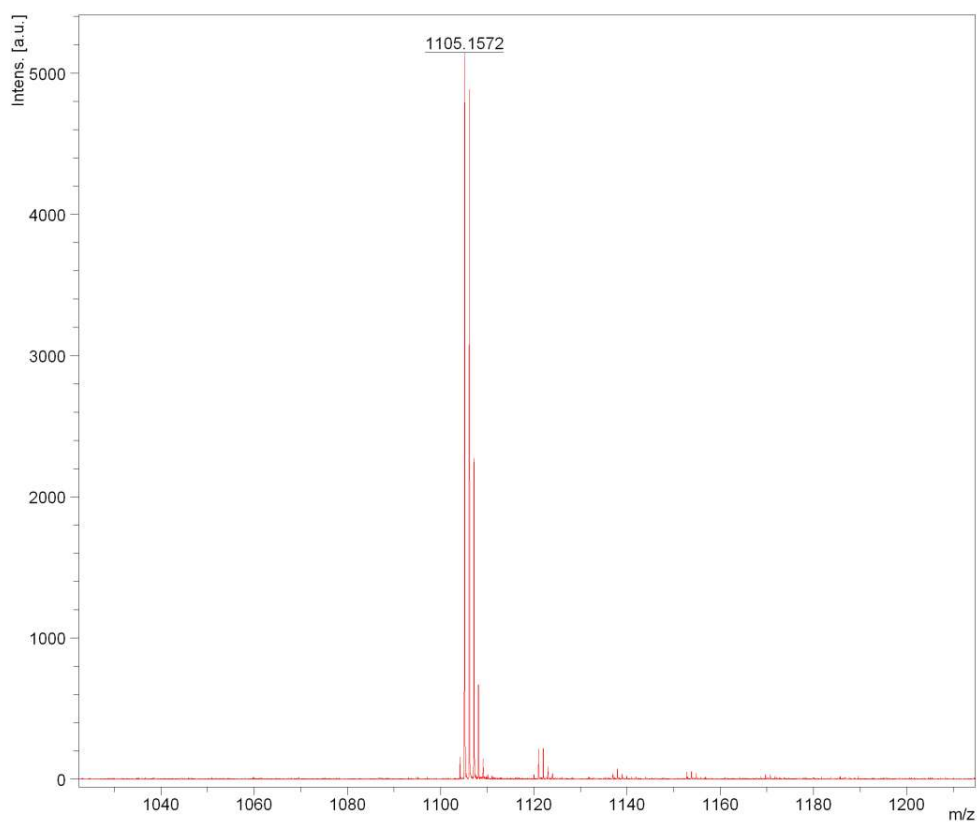

The MALDI-TOF-MS spectrum of **3ha**

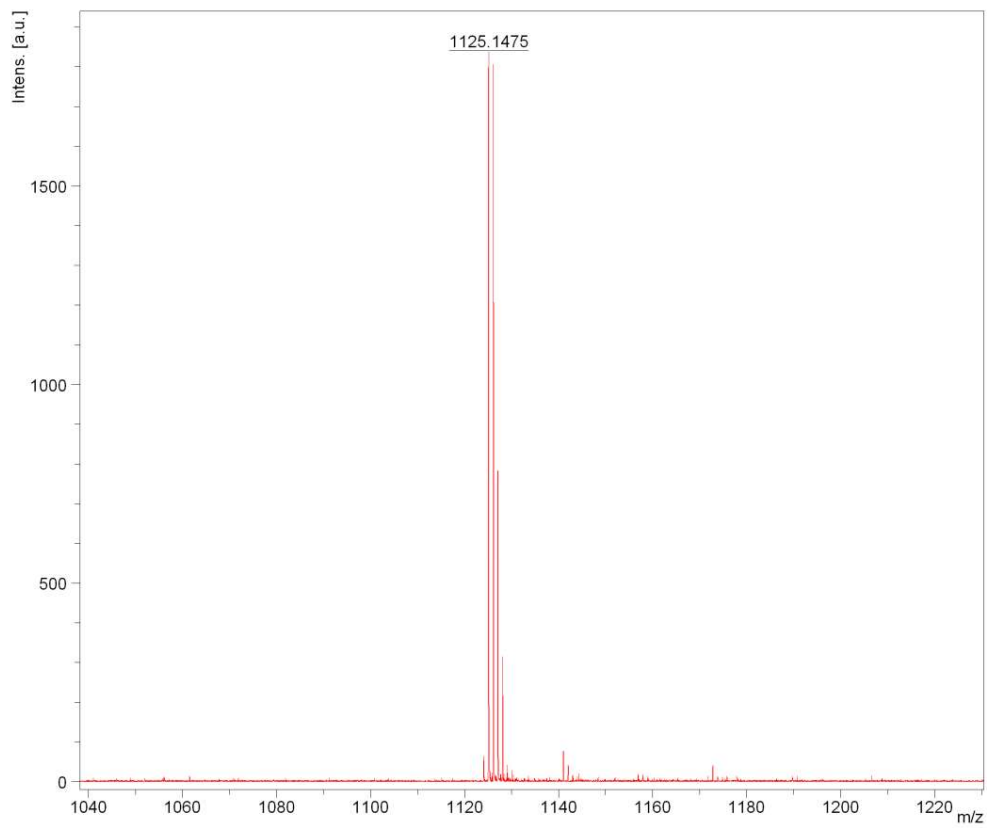

The MALDI-TOF-MS spectrum of **3ia**

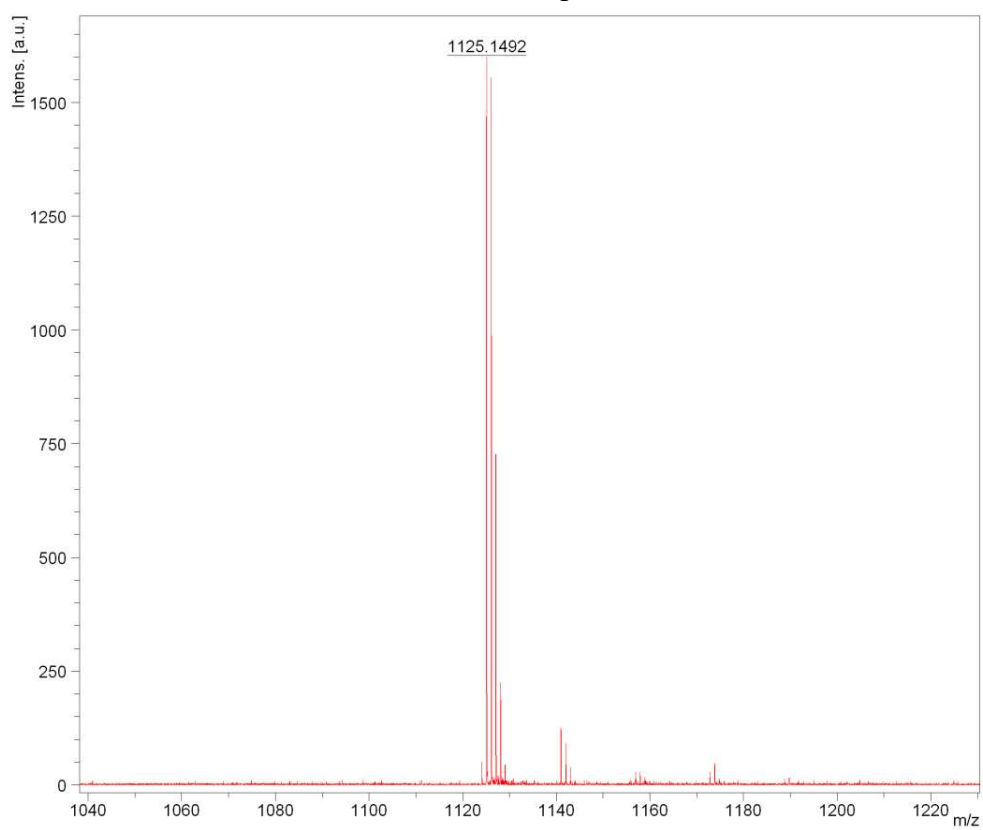

The MALDI-TOF-MS spectrum of **3ja**

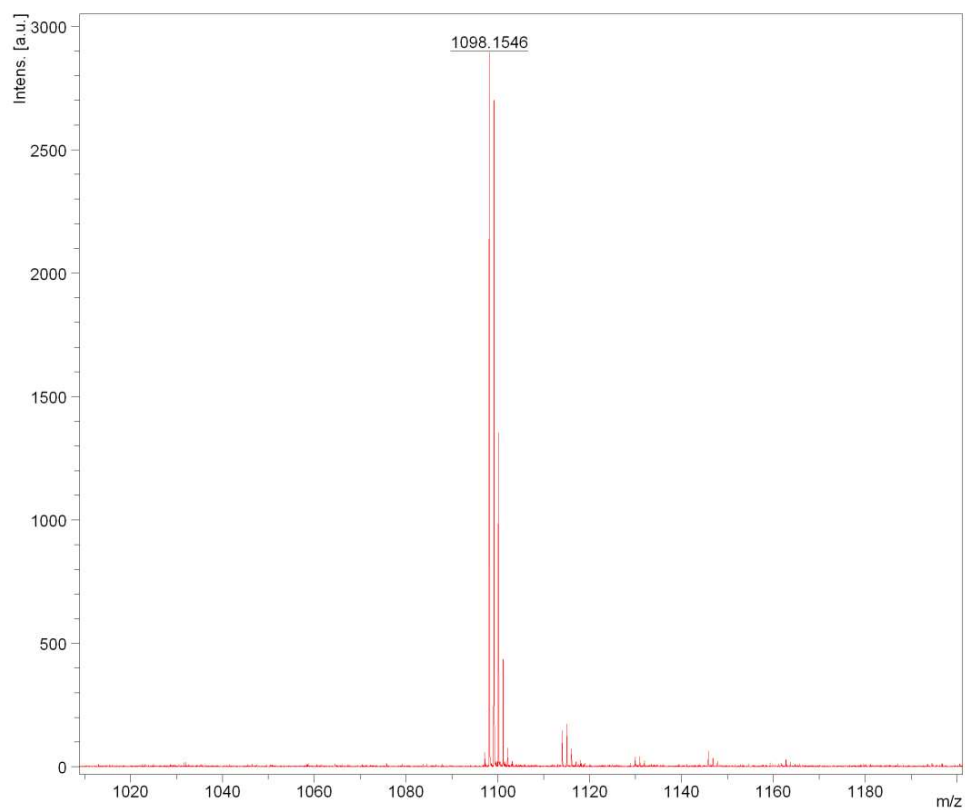

The MALDI-TOF-MS spectrum of **3ab**

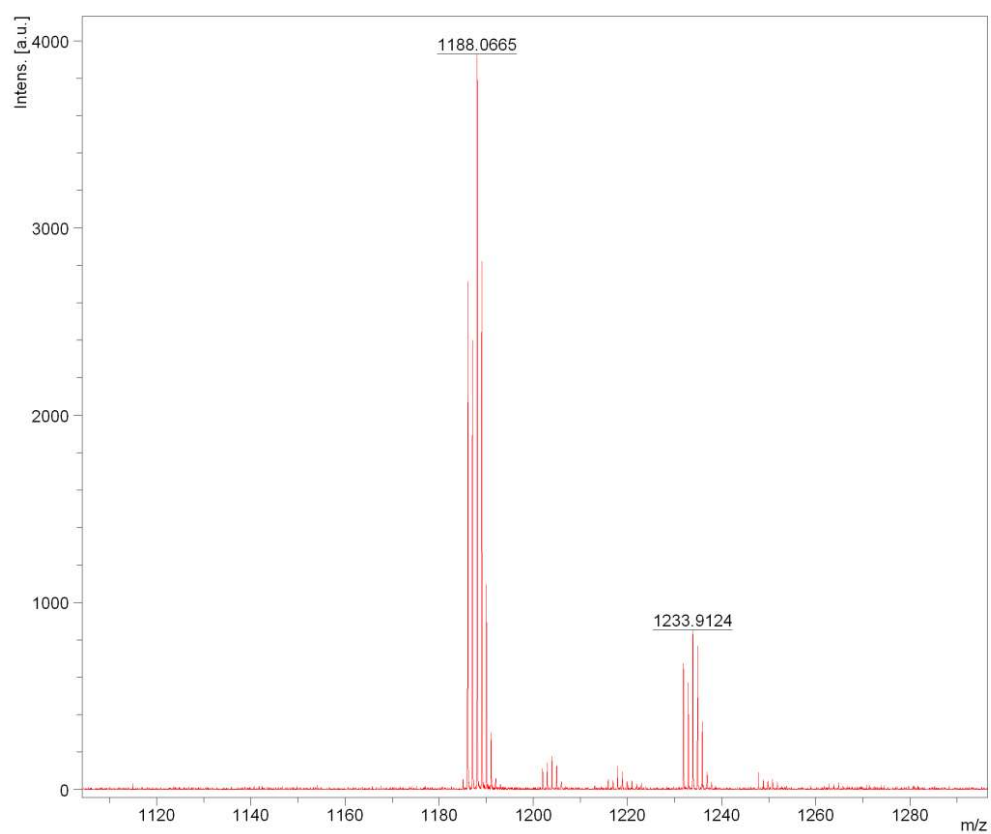

The MALDI-TOF-MS spectrum of **3fb**

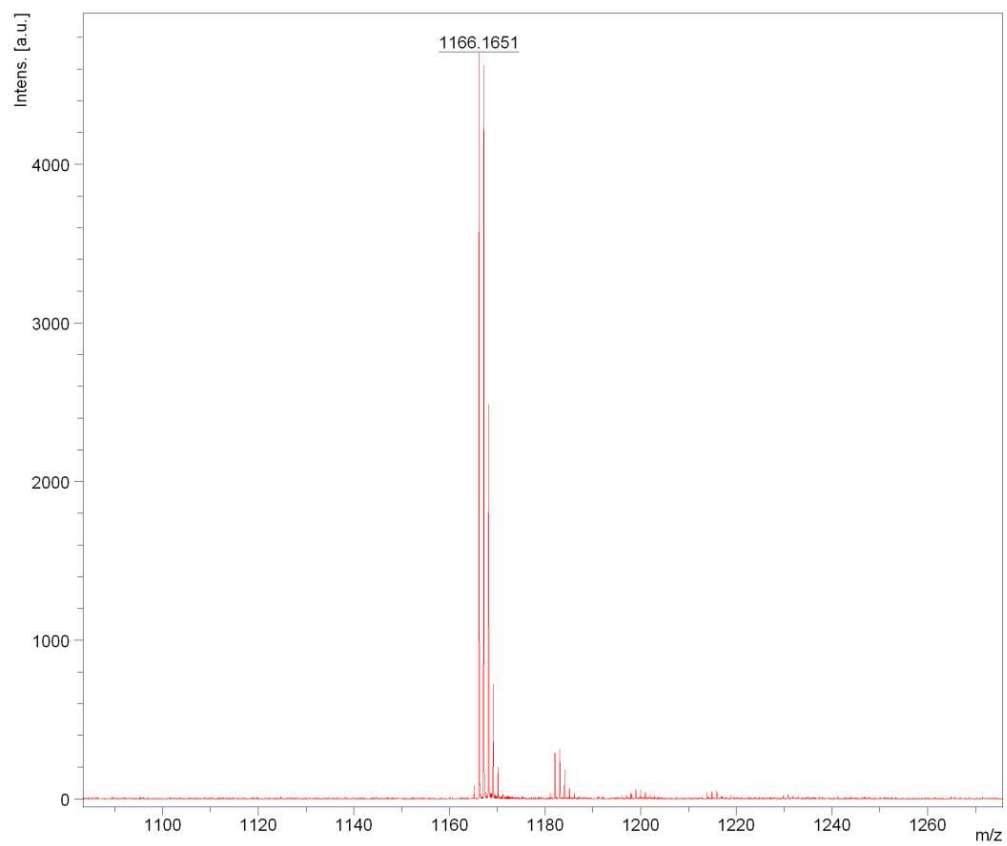

The MALDI-TOF-MS spectrum of **3ac**

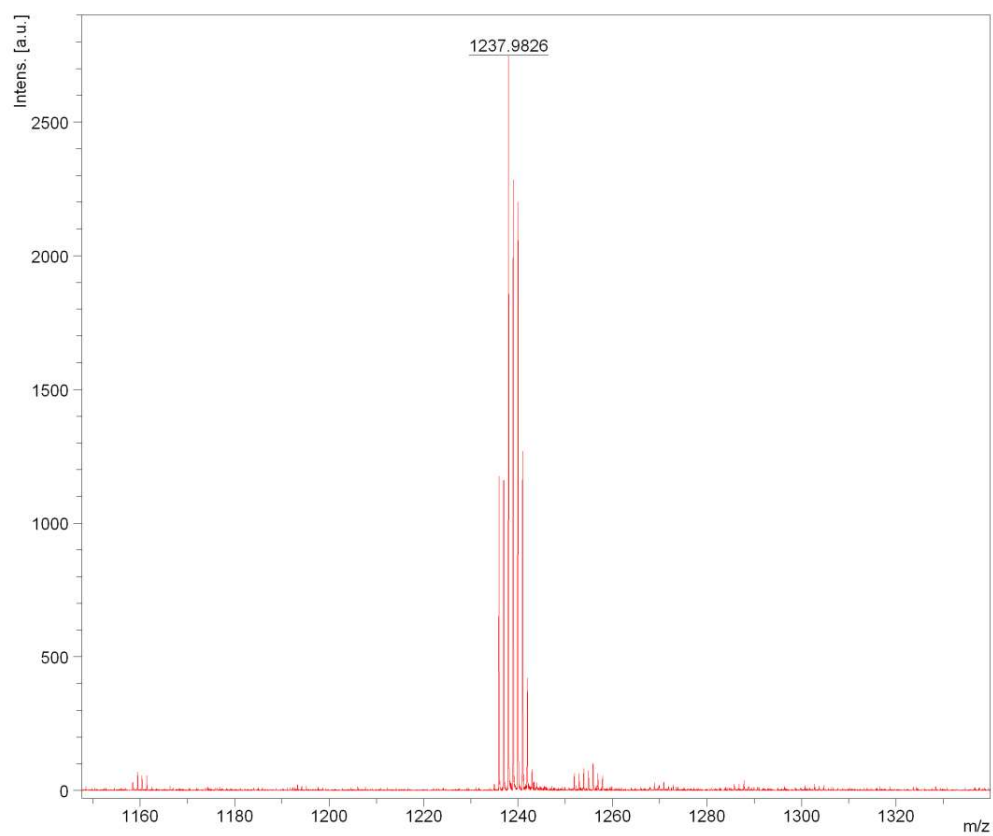

The MALDI-TOF-MS spectrum of **3fc**

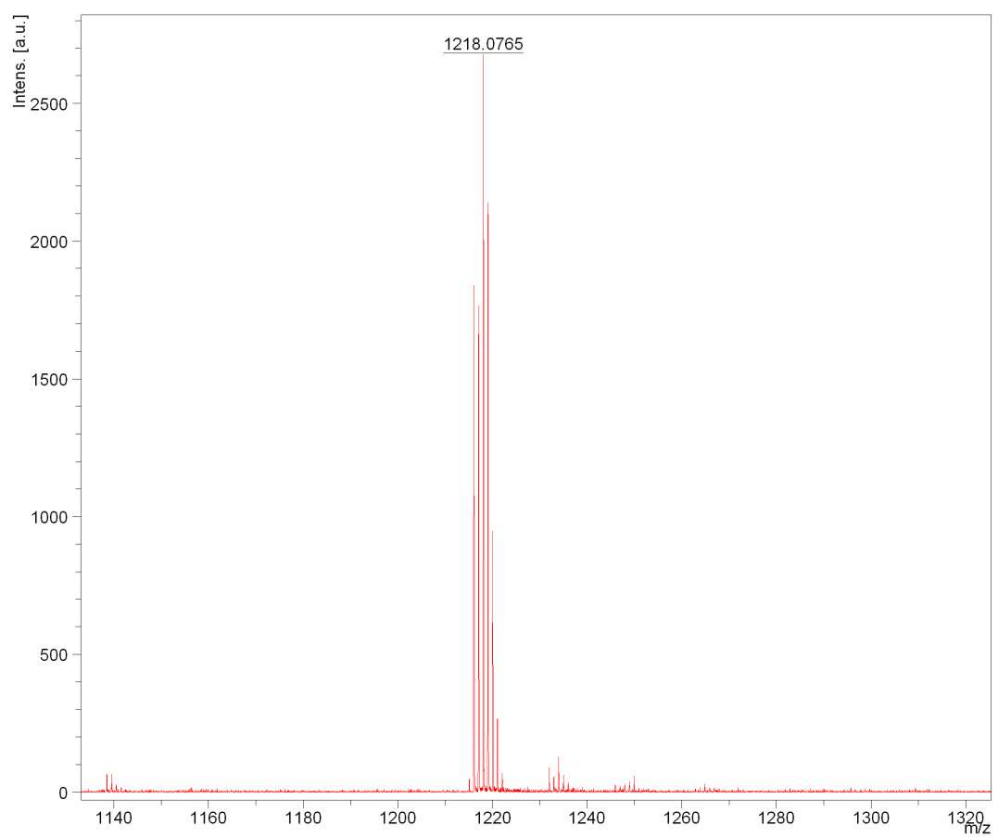

S104



The MALDI-TOF-MS spectrum of **3ad**

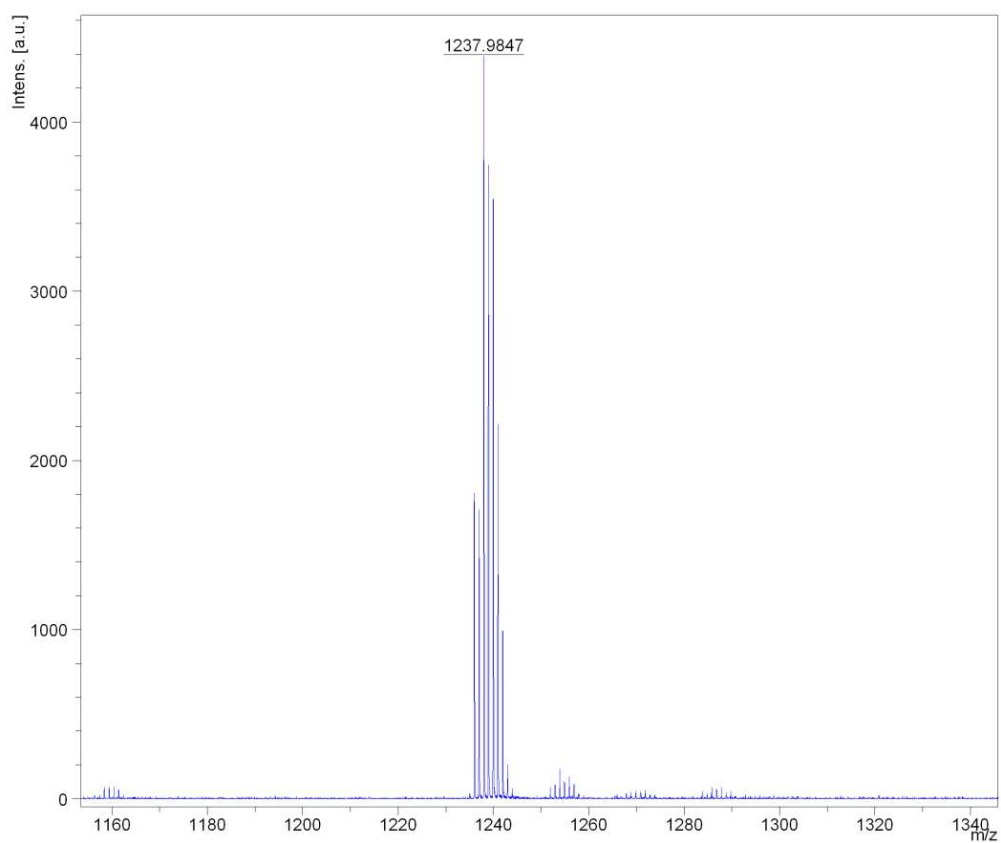

The MALDI-TOF-MS spectrum of **3fd**

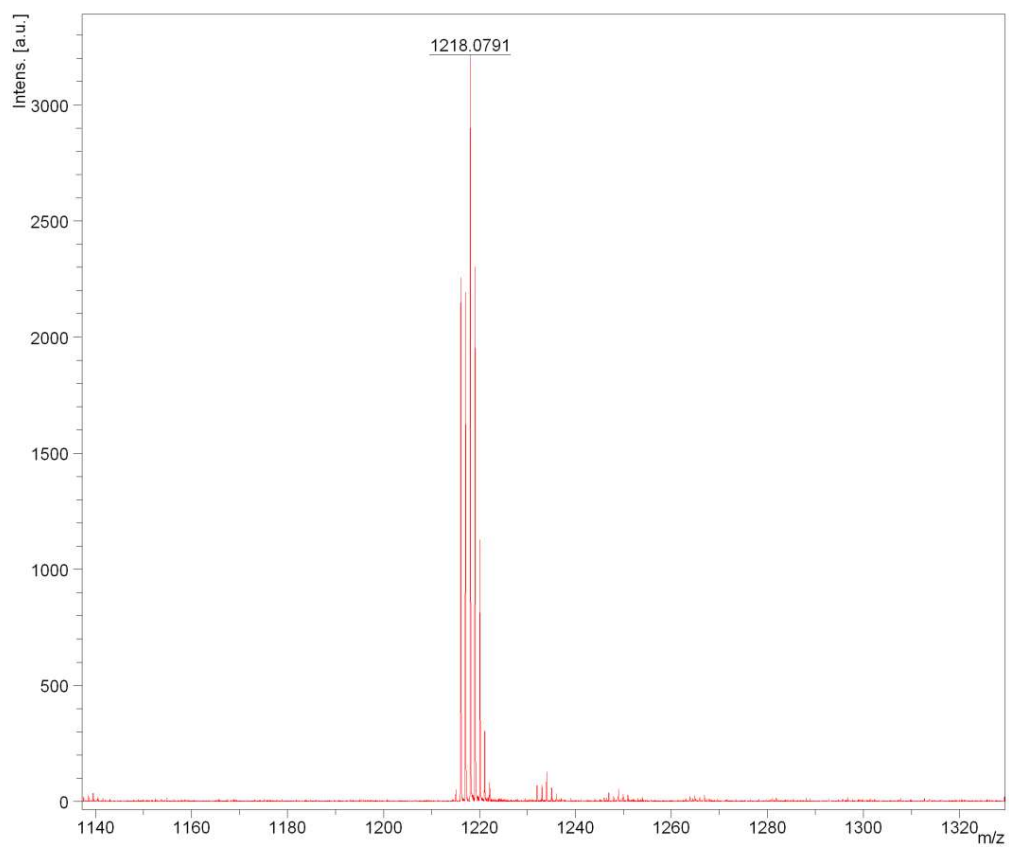

The MALDI-TOF-MS spectrum of **3ae**

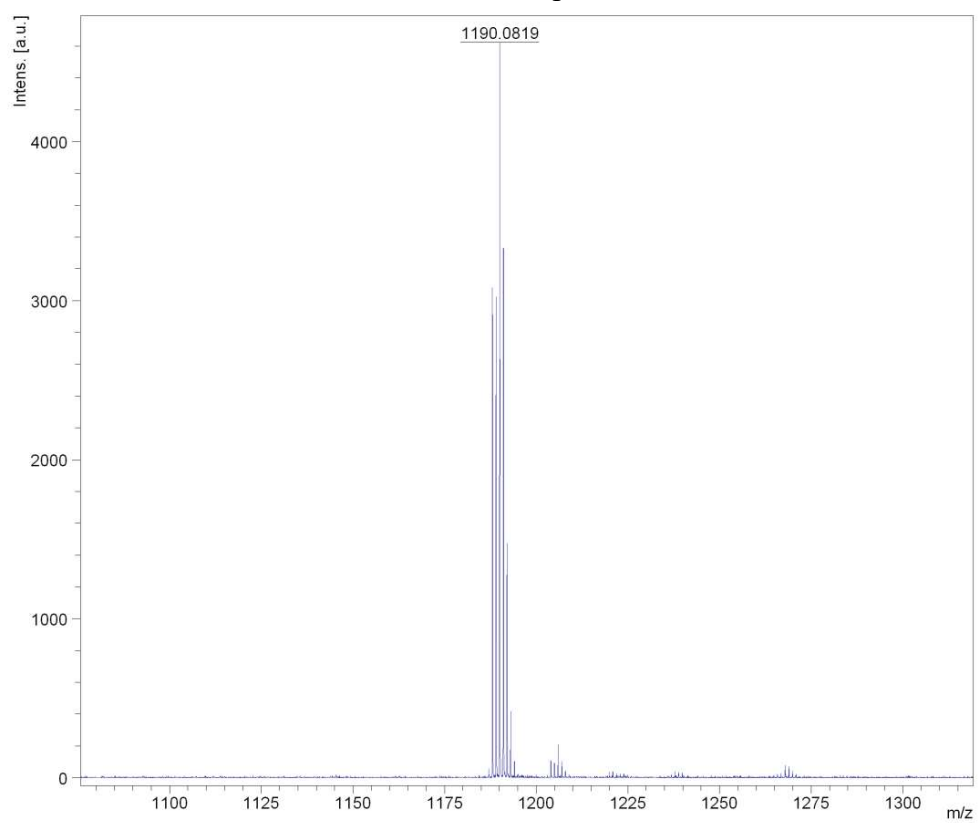

The MALDI-TOF-MS spectrum of **3fe**

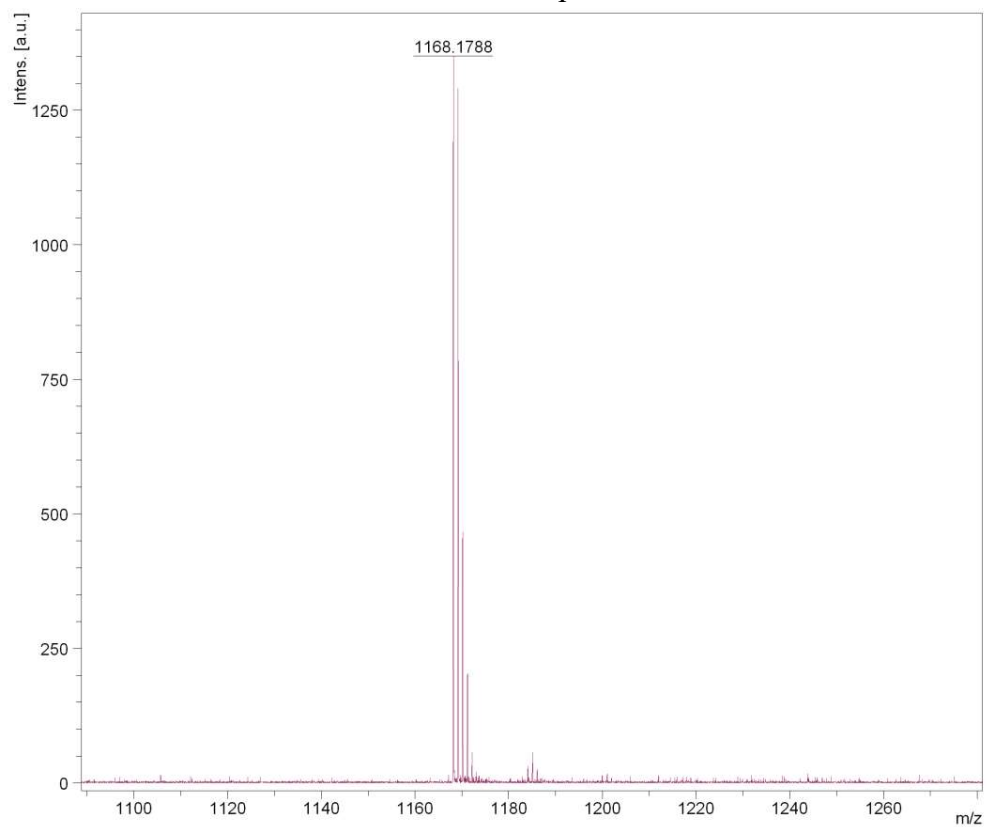

The MALDI-TOF-MS spectrum of **3af**

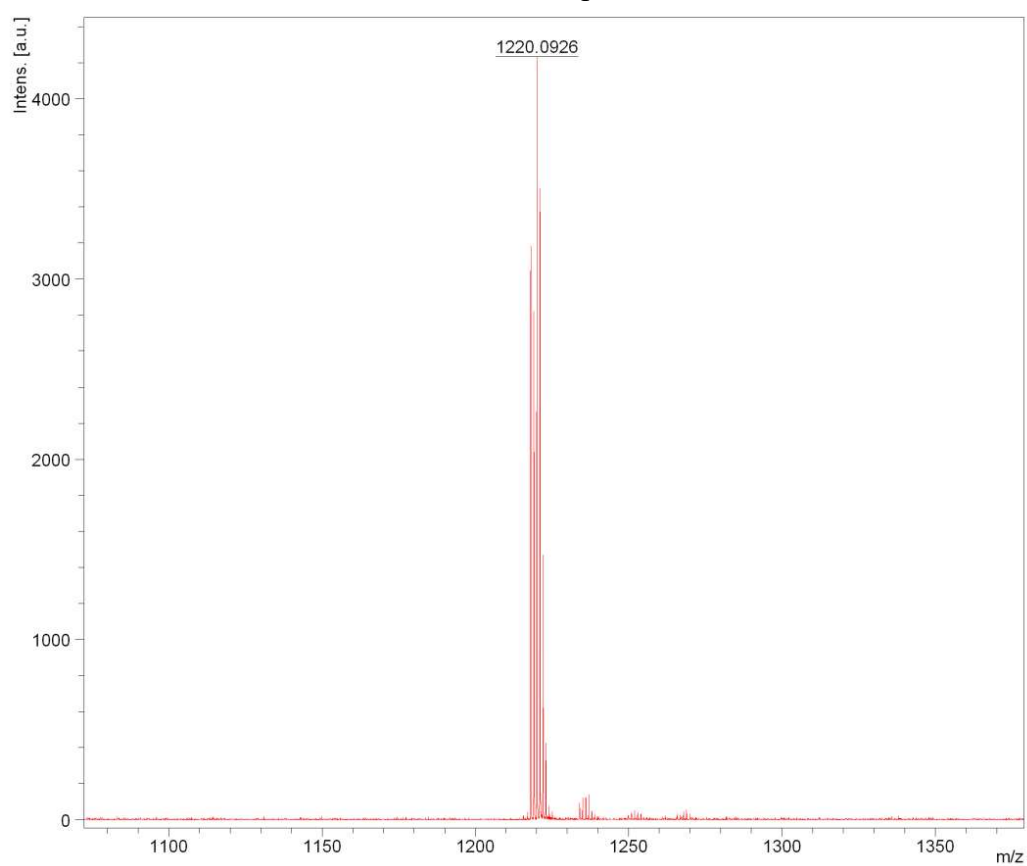

The MALDI-TOF-MS spectrum of **3ff**

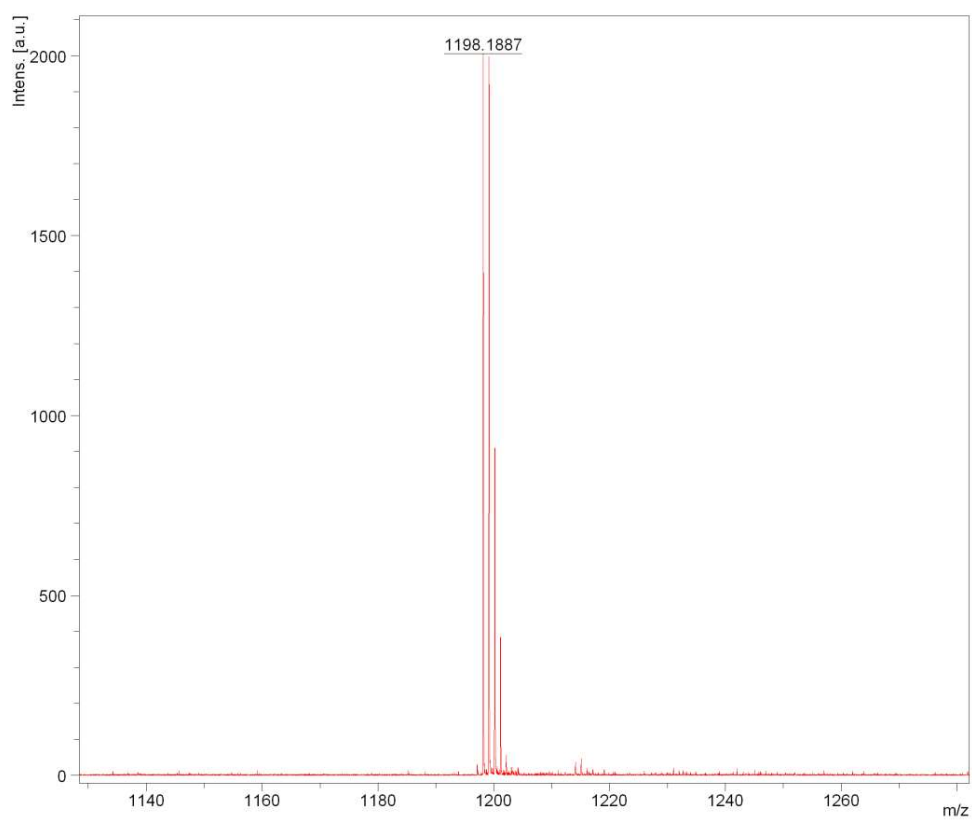

The MALDI-TOF-MS spectrum of **3ag**

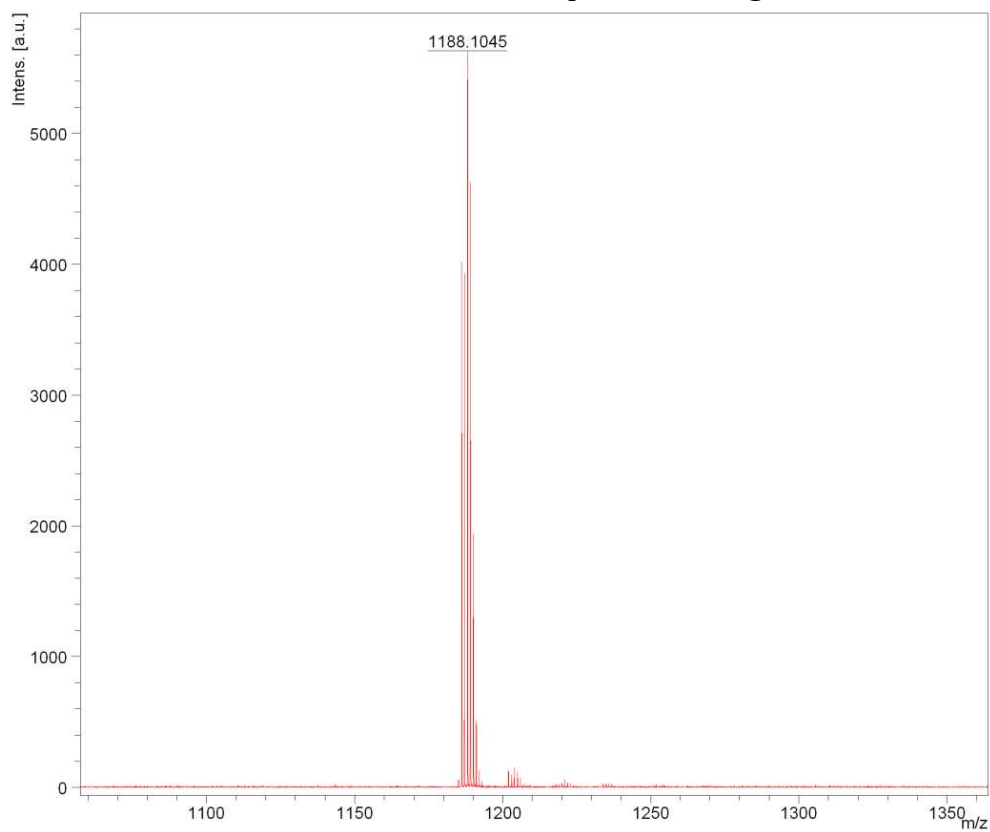

The MALDI-TOF-MS spectrum of **3fg**

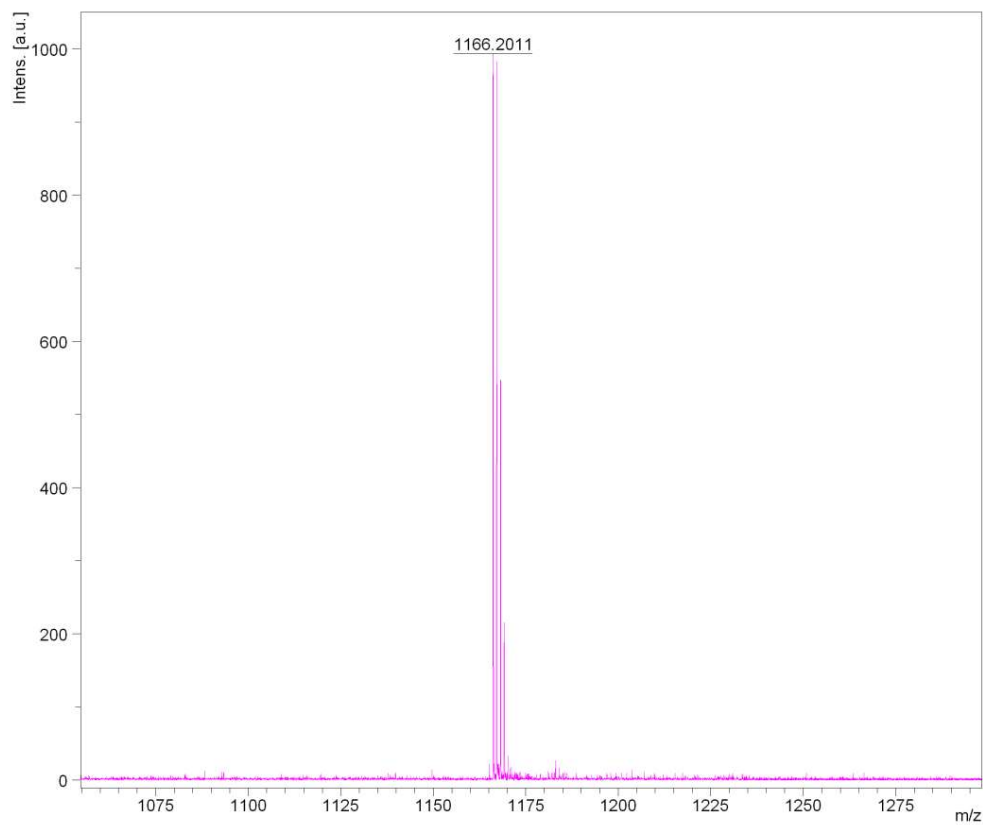

The MALDI-TOF-MS spectrum of **3ah**

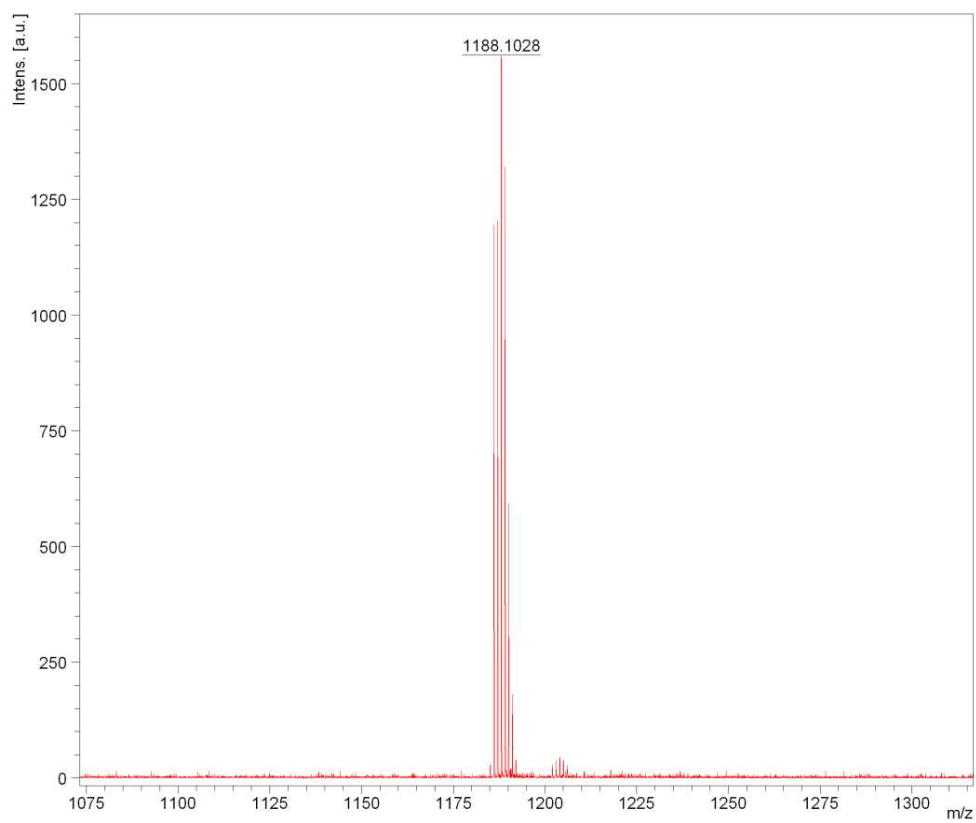

The MALDI-TOF-MS spectrum of **3ai**

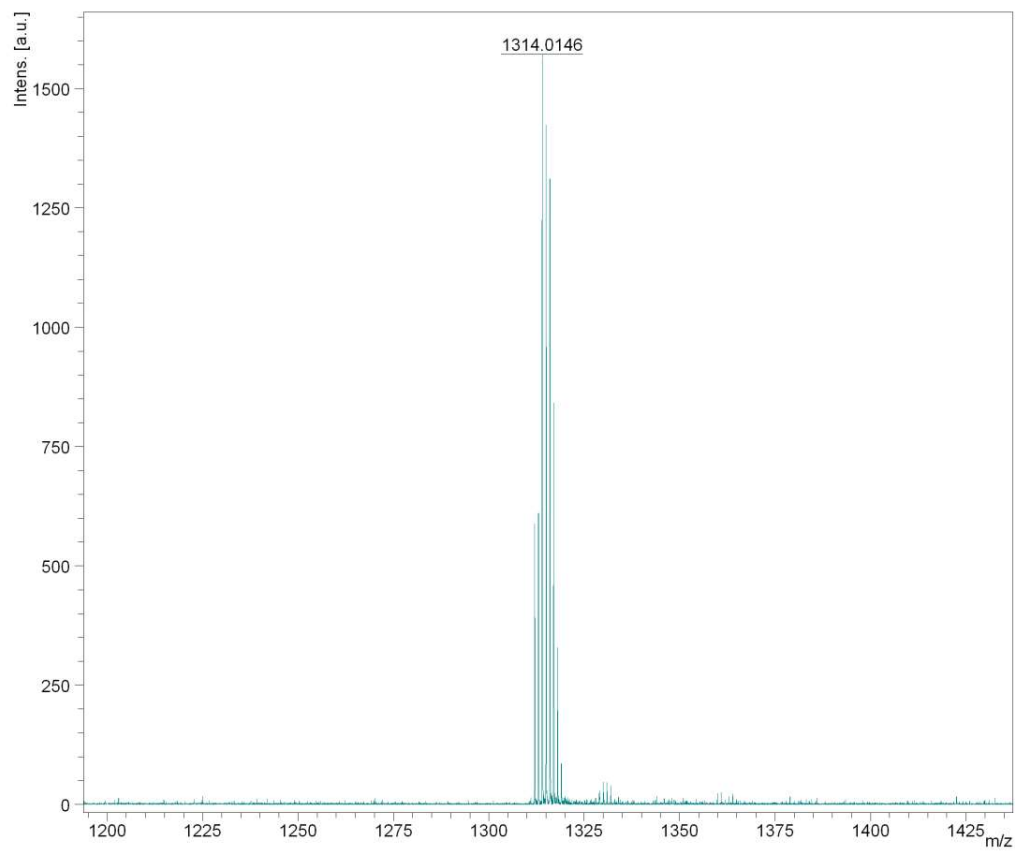

The MALDI-TOF-MS spectrum of **3fi**

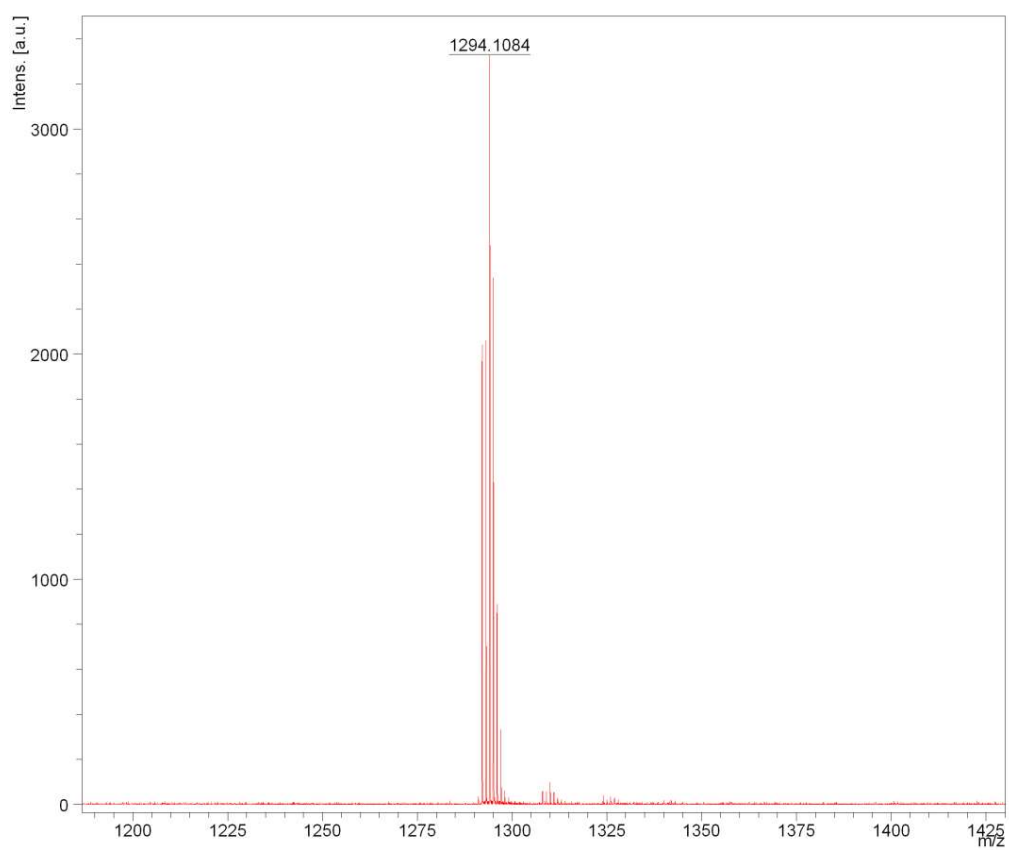

The MALDI-TOF-MS spectrum of **3aj**

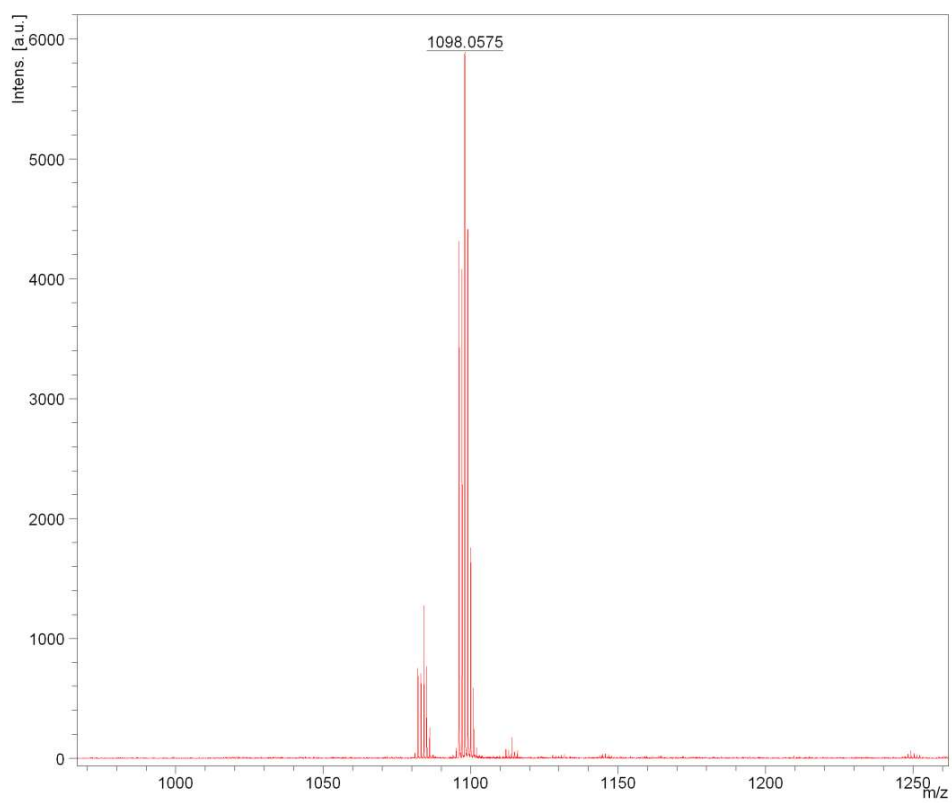

The MALDI-TOF-MS spectrum of **3ak**

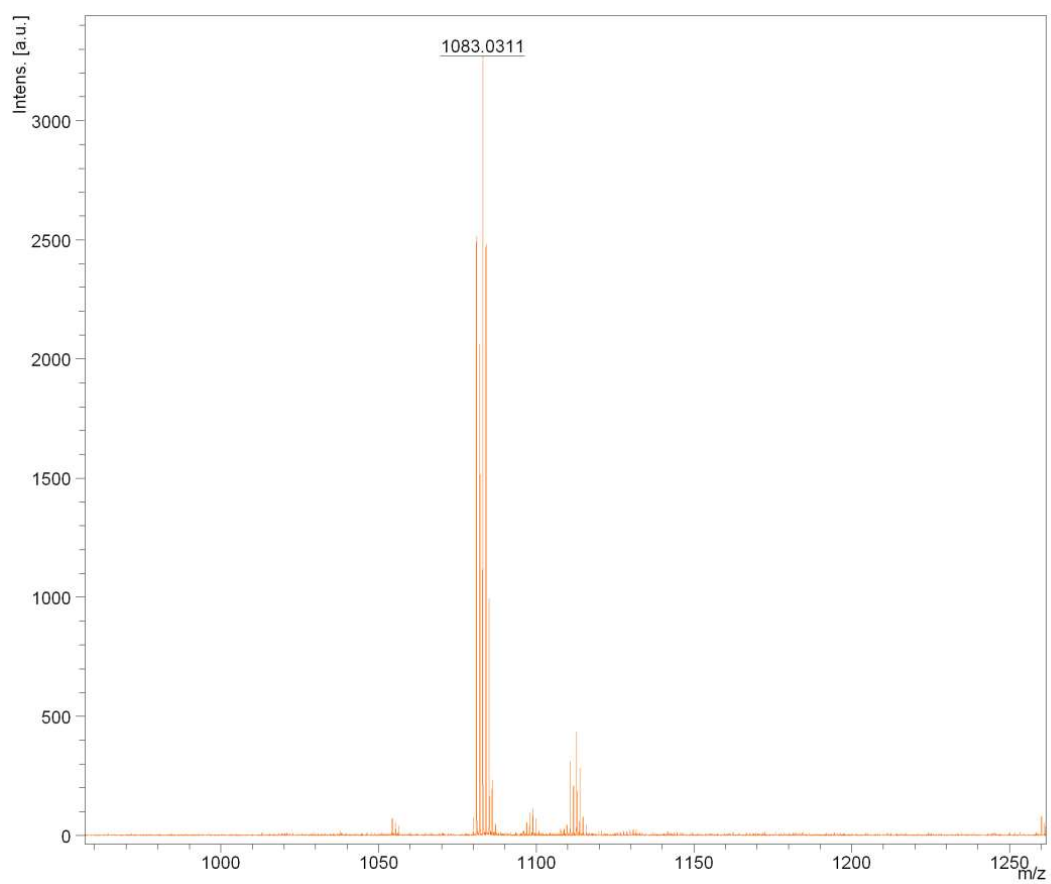

The MALDI-TOF-MS spectrum of **5aa**

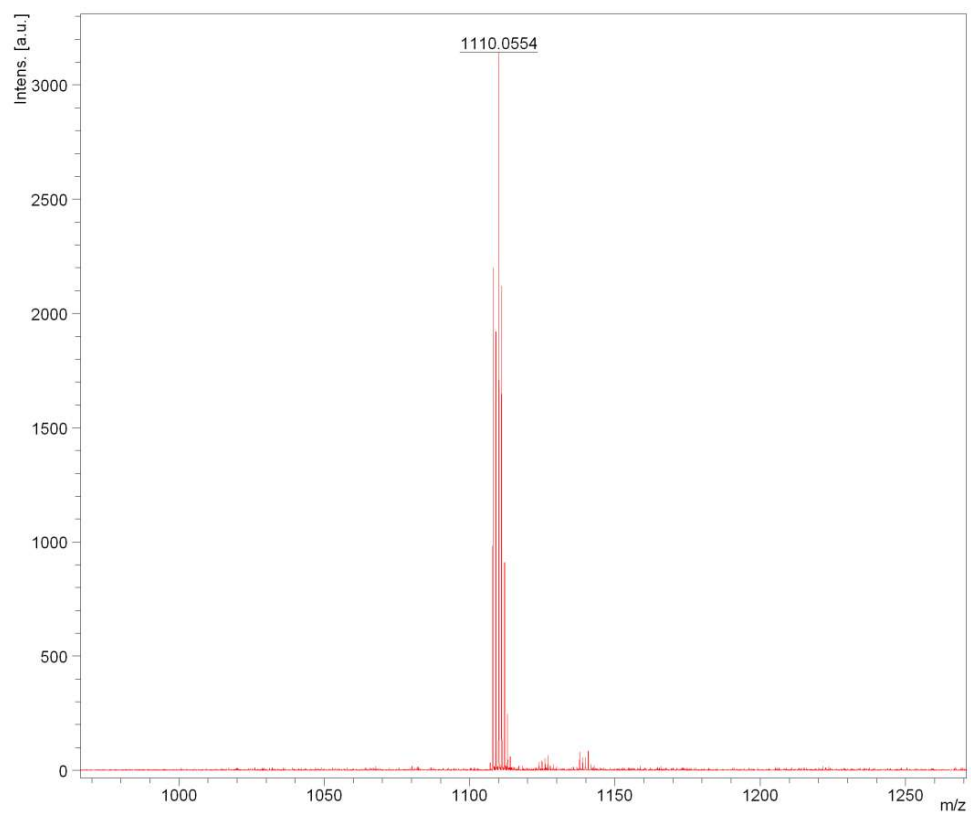

S111

The MALDI-TOF-MS spectrum of **5ab**

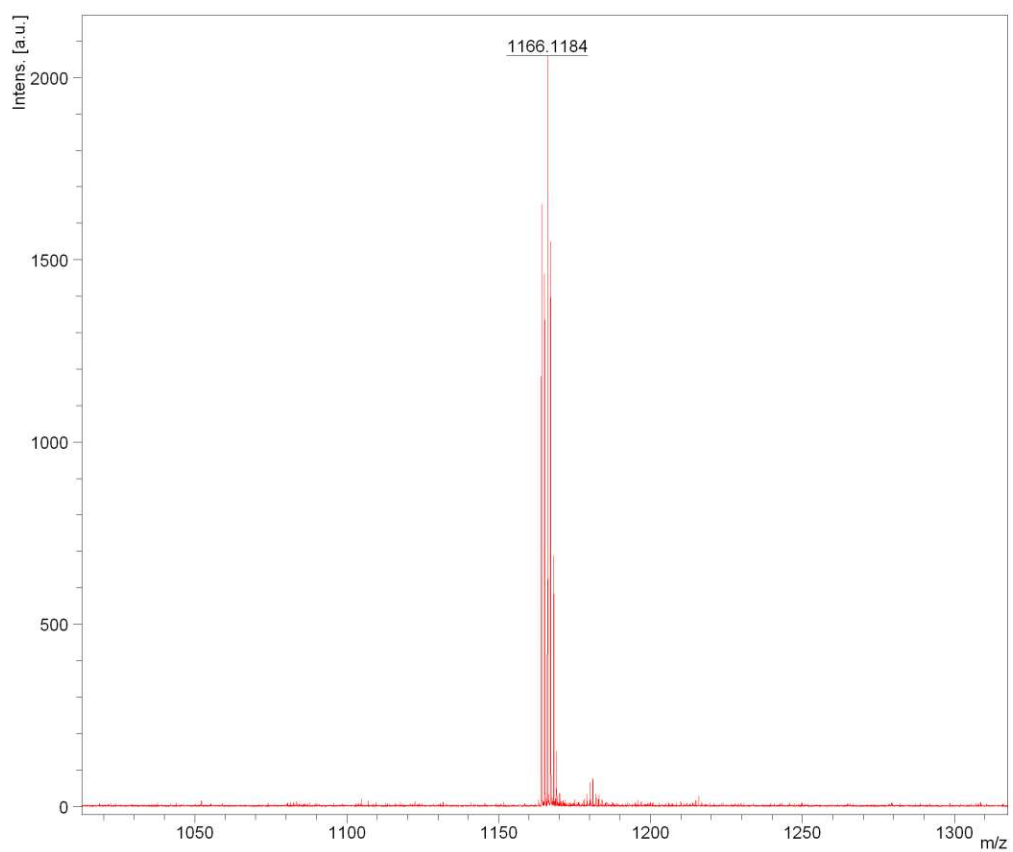

The MALDI-TOF-MS spectrum of **5ac**

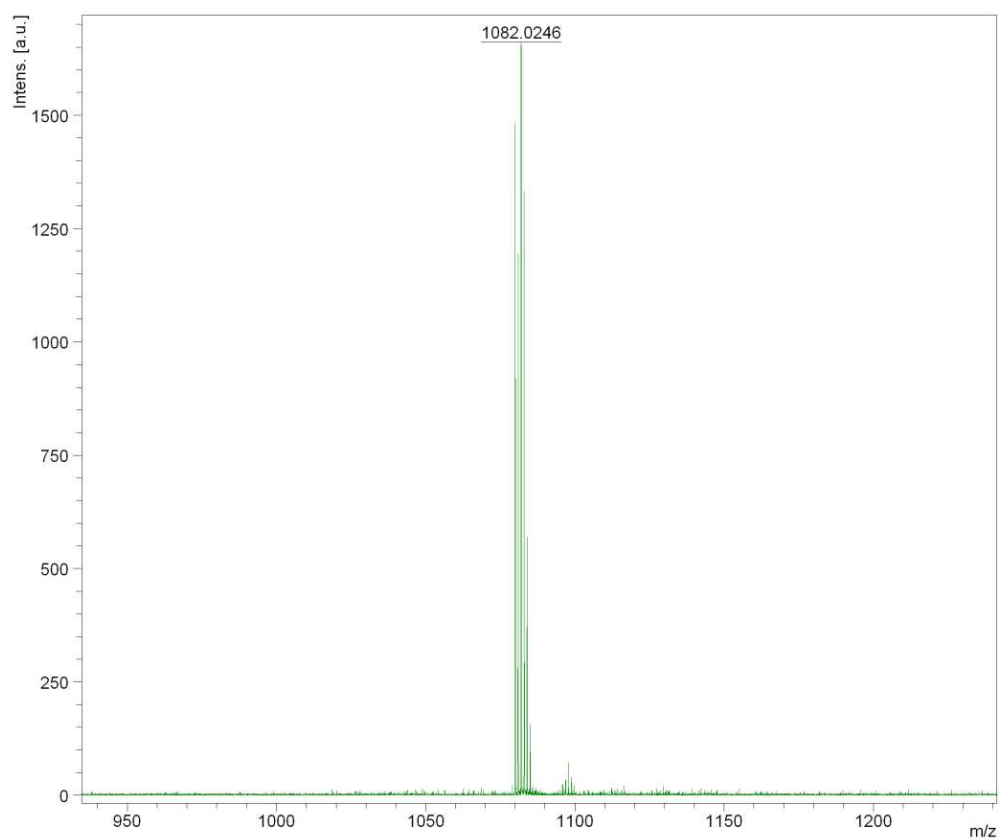



The MALDI-TOF-MS spectrum of **5ad**

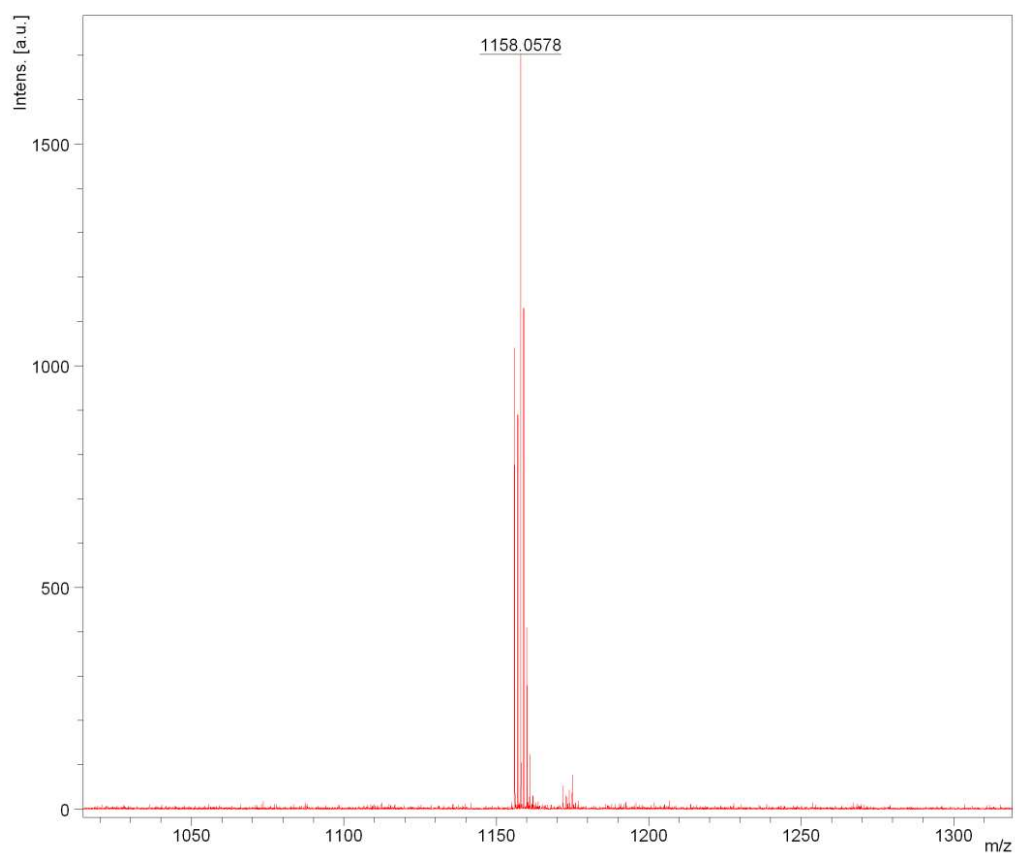

The MALDI-TOF-MS spectrum of **5ae**

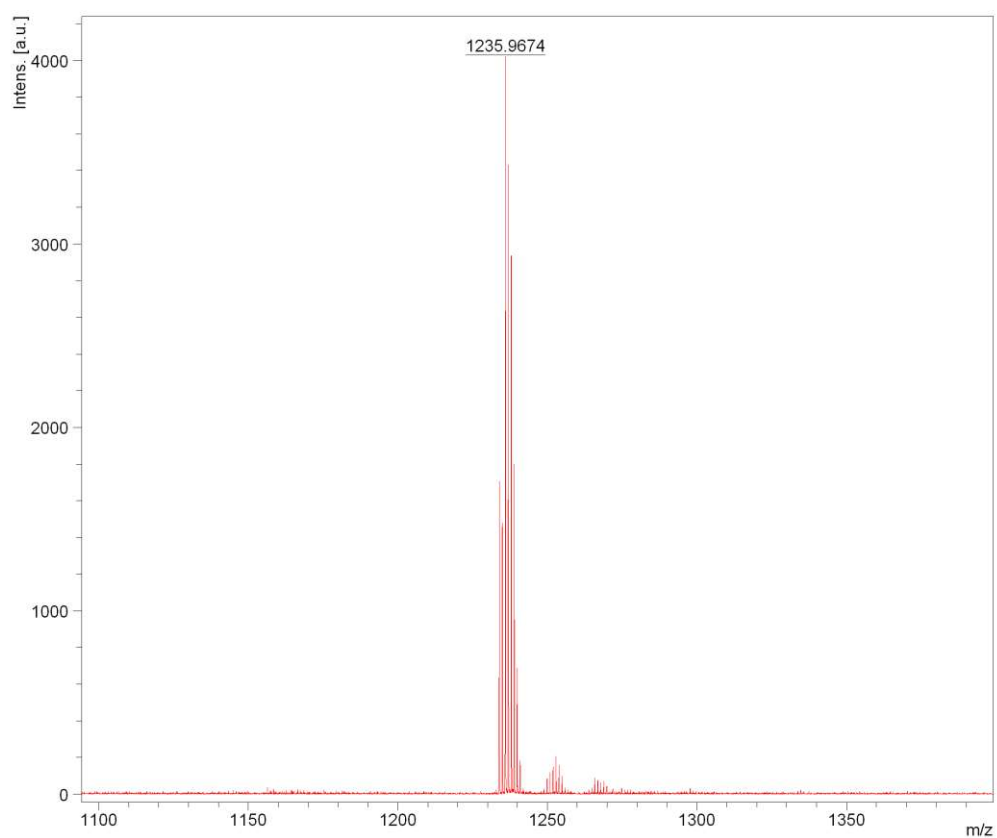

The MALDI-TOF-MS spectrum of **5af**

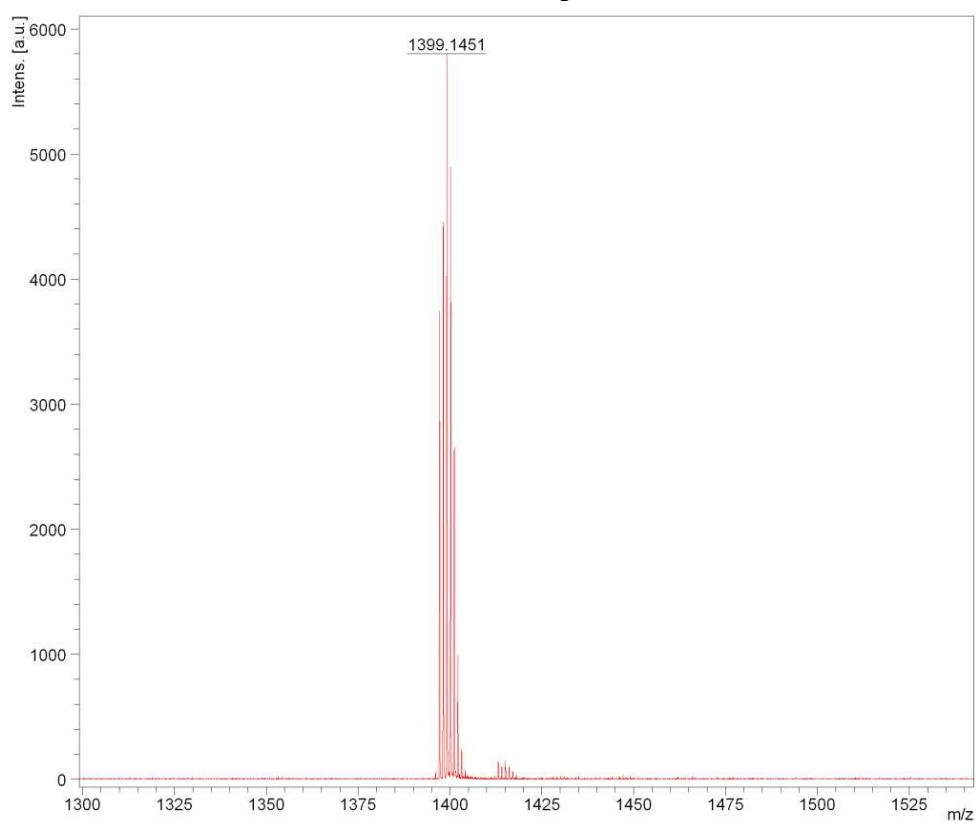

The MALDI-TOF-MS spectrum of **5ag**

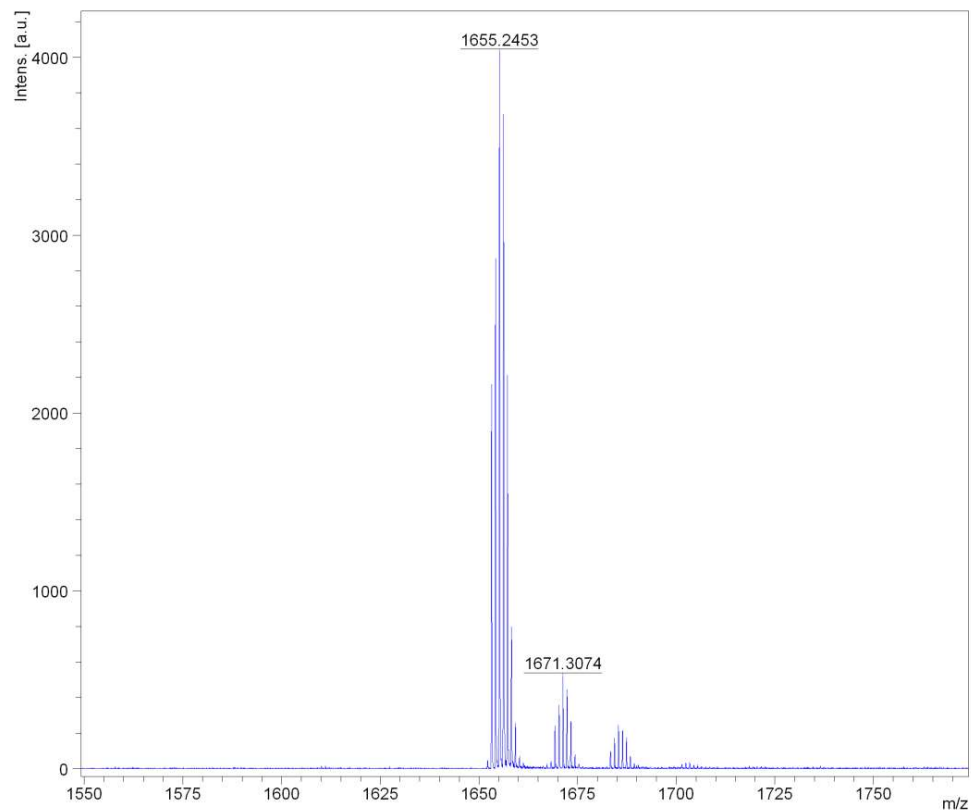

The MALDI-TOF-MS spectrum of **5fg**

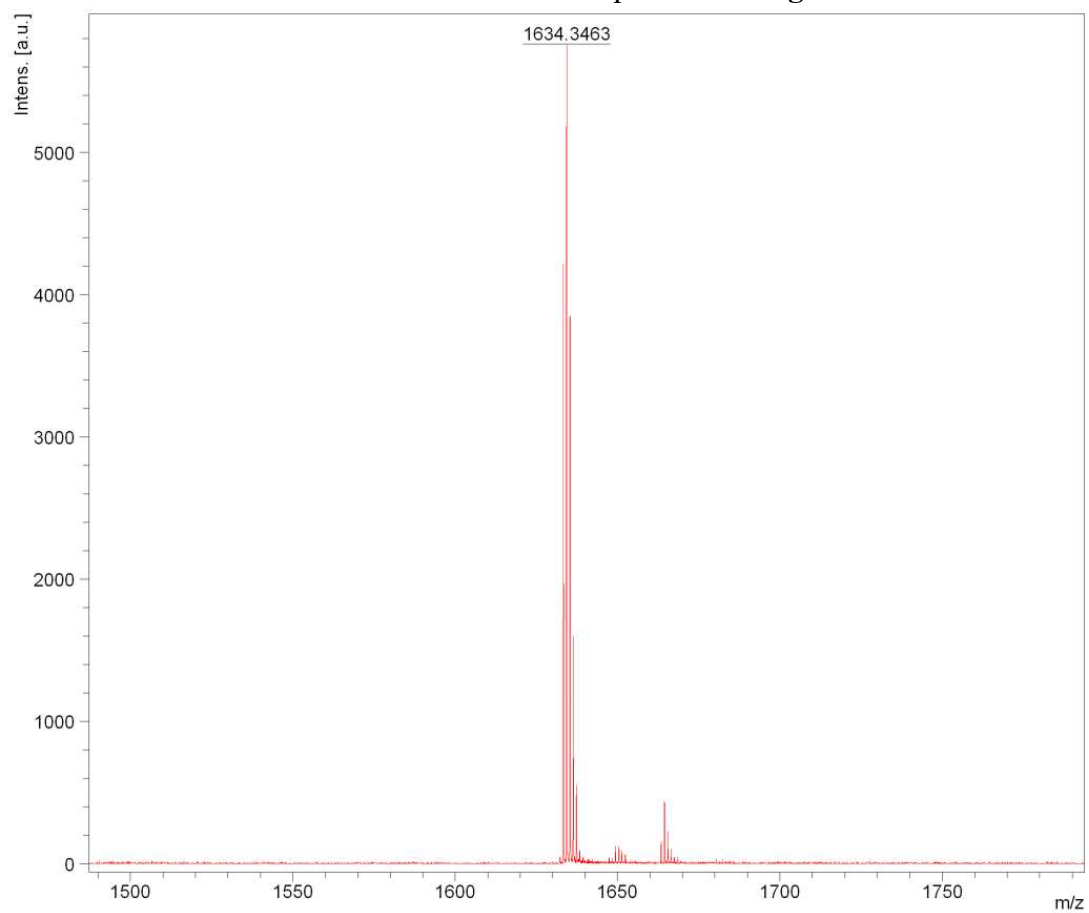

Supplement: d1qo01058a1.pdf [file d1qo01058a1.pdf]
